# Supplementary material for: Shared Molecular Genetic Mechanisms Underlie Endometriosis and Migraine Comorbidity
Source: Genes (Basel). 2020 Feb 29;11(3):268. doi: 10.3390/genes11030268 (PMC7140889; doi:10.3390/genes11030268)
Supplement: Supplementary file 1 [file genes-11-00268-s001.xlsx]

## Sheet: Supplementary_Table1
	Supplementary Table 1: Phenoscaner Results for Mendelian Randomisation instrumental variables
SNP	Reference hg19 coordinates	Reference hg38coordinates	Reference a1	Reference a2	RSID	hg19 coordinates	hg38 coordinates	a1	a2	proxy	r2	Trait	Study	PubMed ID	Ancestry	Year	Beta	SE	P-value	Direction	Sample size	Sample size cases	Sample size controls	Dataset
rs12700667	chr7:25901639	chr7:25862019	A	G	rs12700667	chr7:25901639	chr7:25862019	A	G	0	1	Arm fat-free mass left	Neale B	UKBB	European	2017	-0.009126	0.001764	2.281e-07	-	331159	0	331159	Neale-B_UKBB_EUR_2017
rs12700667	chr7:25901639	chr7:25862019	A	G	rs4722531	chr7:25888015	chr7:25848395	T	C	1	0.90766	Arm fat-free mass left	Neale B	UKBB	European	2017	-0.00873	0.001785	1.01e-06	-	331159	0	331159	Neale-B_UKBB_EUR_2017
rs12700667	chr7:25901639	chr7:25862019	A	G	rs6461887	chr7:25885411	chr7:25845791	C	T	1	0.90758	Arm fat-free mass left	Neale B	UKBB	European	2017	-0.008777	0.001786	8.88e-07	-	331159	0	331159	Neale-B_UKBB_EUR_2017
rs12700667	chr7:25901639	chr7:25862019	A	G	rs979165	chr7:25886478	chr7:25846858	T	G	1	0.90758	Arm fat-free mass left	Neale B	UKBB	European	2017	-0.008851	0.001785	7.091e-07	-	331159	0	331159	Neale-B_UKBB_EUR_2017
rs12700667	chr7:25901639	chr7:25862019	A	G	rs1451385	chr7:25894721	chr7:25855101	C	T	1	0.89802	Arm fat-free mass left	Neale B	UKBB	European	2017	-0.008878	0.001786	6.62e-07	-	331159	0	331159	Neale-B_UKBB_EUR_2017
rs760794	chr6:19790560	chr6:19790329	T	C	rs760794	chr6:19790560	chr6:19790329	T	C	0	1	Arm fat-free mass left	Neale B	UKBB	European	2017	-0.007267	0.001561	3.254e-06	-	331159	0	331159	Neale-B_UKBB_EUR_2017
rs760794	chr6:19790560	chr6:19790329	T	C	rs760796	chr6:19790387	chr6:19790156	T	C	1	1	Arm fat-free mass left	Neale B	UKBB	European	2017	-0.007263	0.001561	3.29e-06	-	331159	0	331159	Neale-B_UKBB_EUR_2017
rs760794	chr6:19790560	chr6:19790329	T	C	rs2223361	chr6:19790809	chr6:19790578	T	C	1	1	Arm fat-free mass left	Neale B	UKBB	European	2017	-0.007282	0.001561	3.106e-06	-	331159	0	331159	Neale-B_UKBB_EUR_2017
rs760794	chr6:19790560	chr6:19790329	T	C	rs6456266	chr6:19791284	chr6:19791053	T	C	1	1	Arm fat-free mass left	Neale B	UKBB	European	2017	-0.007272	0.001561	3.206e-06	-	331159	0	331159	Neale-B_UKBB_EUR_2017
rs12700667	chr7:25901639	chr7:25862019	A	G	rs12700667	chr7:25901639	chr7:25862019	A	G	0	1	Arm fat-free mass right	Neale B	UKBB	European	2017	-0.008051	0.001728	3.194e-06	-	331221	0	331221	Neale-B_UKBB_EUR_2017
rs760794	chr6:19790560	chr6:19790329	T	C	rs760794	chr6:19790560	chr6:19790329	T	C	0	1	Arm fat-free mass right	Neale B	UKBB	European	2017	-0.007332	0.00153	1.661e-06	-	331221	0	331221	Neale-B_UKBB_EUR_2017
rs760794	chr6:19790560	chr6:19790329	T	C	rs760796	chr6:19790387	chr6:19790156	T	C	1	1	Arm fat-free mass right	Neale B	UKBB	European	2017	-0.007319	0.00153	1.727e-06	-	331221	0	331221	Neale-B_UKBB_EUR_2017
rs760794	chr6:19790560	chr6:19790329	T	C	rs2223361	chr6:19790809	chr6:19790578	T	C	1	1	Arm fat-free mass right	Neale B	UKBB	European	2017	-0.007344	0.00153	1.597e-06	-	331221	0	331221	Neale-B_UKBB_EUR_2017
rs760794	chr6:19790560	chr6:19790329	T	C	rs6456266	chr6:19791284	chr6:19791053	T	C	1	1	Arm fat-free mass right	Neale B	UKBB	European	2017	-0.007328	0.00153	1.683e-06	-	331221	0	331221	Neale-B_UKBB_EUR_2017
rs12700667	chr7:25901639	chr7:25862019	A	G	rs12700667	chr7:25901639	chr7:25862019	A	G	0	1	Arm predicted mass left	Neale B	UKBB	European	2017	-0.009369	0.001757	9.698e-08	-	331146	0	331146	Neale-B_UKBB_EUR_2017
rs12700667	chr7:25901639	chr7:25862019	A	G	rs4722531	chr7:25888015	chr7:25848395	T	C	1	0.90766	Arm predicted mass left	Neale B	UKBB	European	2017	-0.008808	0.001779	7.338e-07	-	331146	0	331146	Neale-B_UKBB_EUR_2017
rs12700667	chr7:25901639	chr7:25862019	A	G	rs6461887	chr7:25885411	chr7:25845791	C	T	1	0.90758	Arm predicted mass left	Neale B	UKBB	European	2017	-0.008872	0.001779	6.152e-07	-	331146	0	331146	Neale-B_UKBB_EUR_2017
rs12700667	chr7:25901639	chr7:25862019	A	G	rs979165	chr7:25886478	chr7:25846858	T	G	1	0.90758	Arm predicted mass left	Neale B	UKBB	European	2017	-0.008958	0.001778	4.72e-07	-	331146	0	331146	Neale-B_UKBB_EUR_2017
rs12700667	chr7:25901639	chr7:25862019	A	G	rs1451385	chr7:25894721	chr7:25855101	C	T	1	0.89802	Arm predicted mass left	Neale B	UKBB	European	2017	-0.008954	0.001779	4.818e-07	-	331146	0	331146	Neale-B_UKBB_EUR_2017
rs12700667	chr7:25901639	chr7:25862019	A	G	rs12700667	chr7:25901639	chr7:25862019	A	G	0	1	Arm predicted mass right	Neale B	UKBB	European	2017	-0.007886	0.001722	4.679e-06	-	331216	0	331216	Neale-B_UKBB_EUR_2017
rs760794	chr6:19790560	chr6:19790329	T	C	rs760794	chr6:19790560	chr6:19790329	T	C	0	1	Arm predicted mass right	Neale B	UKBB	European	2017	-0.00719	0.001525	2.418e-06	-	331216	0	331216	Neale-B_UKBB_EUR_2017
rs760794	chr6:19790560	chr6:19790329	T	C	rs760796	chr6:19790387	chr6:19790156	T	C	1	1	Arm predicted mass right	Neale B	UKBB	European	2017	-0.007174	0.001525	2.539e-06	-	331216	0	331216	Neale-B_UKBB_EUR_2017
rs760794	chr6:19790560	chr6:19790329	T	C	rs2223361	chr6:19790809	chr6:19790578	T	C	1	1	Arm predicted mass right	Neale B	UKBB	European	2017	-0.007194	0.001525	2.385e-06	-	331216	0	331216	Neale-B_UKBB_EUR_2017
rs760794	chr6:19790560	chr6:19790329	T	C	rs6456266	chr6:19791284	chr6:19791053	T	C	1	1	Arm predicted mass right	Neale B	UKBB	European	2017	-0.007187	0.001525	2.446e-06	-	331216	0	331216	Neale-B_UKBB_EUR_2017
rs12700667	chr7:25901639	chr7:25862019	A	G	rs12700667	chr7:25901639	chr7:25862019	A	G	0	1	Basal metabolic rate	Neale B	UKBB	European	2017	-0.009541	0.001839	2.134e-07	-	331307	0	331307	Neale-B_UKBB_EUR_2017
rs12700667	chr7:25901639	chr7:25862019	A	G	rs4722531	chr7:25888015	chr7:25848395	T	C	1	0.90766	Basal metabolic rate	Neale B	UKBB	European	2017	-0.009129	0.001862	9.457e-07	-	331307	0	331307	Neale-B_UKBB_EUR_2017
rs12700667	chr7:25901639	chr7:25862019	A	G	rs6461887	chr7:25885411	chr7:25845791	C	T	1	0.90758	Basal metabolic rate	Neale B	UKBB	European	2017	-0.009175	0.001863	8.397e-07	-	331307	0	331307	Neale-B_UKBB_EUR_2017
rs12700667	chr7:25901639	chr7:25862019	A	G	rs979165	chr7:25886478	chr7:25846858	T	G	1	0.90758	Basal metabolic rate	Neale B	UKBB	European	2017	-0.009242	0.001862	6.881e-07	-	331307	0	331307	Neale-B_UKBB_EUR_2017
rs12700667	chr7:25901639	chr7:25862019	A	G	rs1451385	chr7:25894721	chr7:25855101	C	T	1	0.89802	Basal metabolic rate	Neale B	UKBB	European	2017	-0.009193	0.001862	7.941e-07	-	331307	0	331307	Neale-B_UKBB_EUR_2017
rs12037376	chr1:22462111	chr1:22135618	A	G	rs12037376	chr1:22462111	chr1:22135618	A	G	0	1	Bilateral oophorectomy	Neale B	UKBB	European	2017	0.009297	0.001266	2.111e-13	+	178676	14702	163974	Neale-B_UKBB_EUR_2017
rs12037376	chr1:22462111	chr1:22135618	A	G	rs61768001	chr1:22465820	chr1:22139327	C	T	1	0.98377	Bilateral oophorectomy	Neale B	UKBB	European	2017	0.009236	0.001262	2.552e-13	+	178676	14702	163974	Neale-B_UKBB_EUR_2017
rs12037376	chr1:22462111	chr1:22135618	A	G	rs3820282	chr1:22468215	chr1:22141722	T	C	1	0.98377	Bilateral oophorectomy	Neale B	UKBB	European	2017	0.009282	0.001262	1.921e-13	+	178676	14702	163974	Neale-B_UKBB_EUR_2017
rs12037376	chr1:22462111	chr1:22135618	A	G	rs10917151	chr1:22422721	chr1:22096228	A	G	1	0.91394	Bilateral oophorectomy	Neale B	UKBB	European	2017	0.009042	0.001245	3.886e-13	+	178676	14702	163974	Neale-B_UKBB_EUR_2017
rs12037376	chr1:22462111	chr1:22135618	A	G	rs56318008	chr1:22470407	chr1:22143914	T	C	1	0.91134	Bilateral oophorectomy	Neale B	UKBB	European	2017	0.008658	0.001296	2.373e-11	+	178676	14702	163974	Neale-B_UKBB_EUR_2017
rs71575922	chr6:152554014	chr6:152232879	C	G	rs71575922	chr6:152554014	chr6:152232879	C	G	0	1	Bilateral oophorectomy	Neale B	UKBB	European	2017	-0.006164	0.001274	1.313e-06	-	178676	14702	163974	Neale-B_UKBB_EUR_2017
rs71575922	chr6:152554014	chr6:152232879	C	G	rs58415480	chr6:152562271	chr6:152241136	C	G	1	0.91214	Bilateral oophorectomy	Neale B	UKBB	European	2017	-0.006569	0.001283	3.061e-07	-	178676	14702	163974	Neale-B_UKBB_EUR_2017
rs74485684	chr11:30242287	chr11:30220740	C	T	rs74485684	chr11:30242287	chr11:30220740	C	T	0	1	Bilateral oophorectomy	Neale B	UKBB	European	2017	-0.007317	0.001251	5.017e-09	-	178676	14702	163974	Neale-B_UKBB_EUR_2017
rs74485684	chr11:30242287	chr11:30220740	C	T	rs75525300	chr11:30307989	chr11:30286442	G	A	1	1	Bilateral oophorectomy	Neale B	UKBB	European	2017	-0.007366	0.00125	3.851e-09	-	178676	14702	163974	Neale-B_UKBB_EUR_2017
rs74485684	chr11:30242287	chr11:30220740	C	T	rs12278989	chr11:30316822	chr11:30295275	G	A	1	1	Bilateral oophorectomy	Neale B	UKBB	European	2017	-0.007361	0.00125	3.92e-09	-	178676	14702	163974	Neale-B_UKBB_EUR_2017
rs74485684	chr11:30242287	chr11:30220740	C	T	rs11031040	chr11:30317733	chr11:30296186	G	T	1	1	Bilateral oophorectomy	Neale B	UKBB	European	2017	-0.007361	0.00125	3.917e-09	-	178676	14702	163974	Neale-B_UKBB_EUR_2017
rs74485684	chr11:30242287	chr11:30220740	C	T	rs12271187	chr11:30319259	chr11:30297712	A	G	1	1	Bilateral oophorectomy	Neale B	UKBB	European	2017	-0.007361	0.00125	3.916e-09	-	178676	14702	163974	Neale-B_UKBB_EUR_2017
rs12037376	chr1:22462111	chr1:22135618	A	G	rs12037376	chr1:22462111	chr1:22135618	A	G	0	1	Birth weight of first child	Neale B	UKBB	European	2017	0.02918	0.006142	2.03e-06	+	145558	0	145558	Neale-B_UKBB_EUR_2017
rs12037376	chr1:22462111	chr1:22135618	A	G	rs61768001	chr1:22465820	chr1:22139327	C	T	1	0.98377	Birth weight of first child	Neale B	UKBB	European	2017	0.02854	0.006123	3.144e-06	+	145558	0	145558	Neale-B_UKBB_EUR_2017
rs12037376	chr1:22462111	chr1:22135618	A	G	rs3820282	chr1:22468215	chr1:22141722	T	C	1	0.98377	Birth weight of first child	Neale B	UKBB	European	2017	0.02837	0.006122	3.598e-06	+	145558	0	145558	Neale-B_UKBB_EUR_2017
rs12037376	chr1:22462111	chr1:22135618	A	G	rs10917151	chr1:22422721	chr1:22096228	A	G	1	0.91394	Birth weight of first child	Neale B	UKBB	European	2017	0.02839	0.00604	2.594e-06	+	145558	0	145558	Neale-B_UKBB_EUR_2017
rs12037376	chr1:22462111	chr1:22135618	A	G	rs56318008	chr1:22470407	chr1:22143914	T	C	1	0.91134	Birth weight of first child	Neale B	UKBB	European	2017	0.03106	0.006285	7.749e-07	+	145558	0	145558	Neale-B_UKBB_EUR_2017
rs12037376	chr1:22462111	chr1:22135618	A	G	rs3820282	chr1:22468215	chr1:22141722	T	C	1	0.98377	Bone mineral density	GEFOS	28743860	European	2017	0.1077	0.01888	1.125e-08	+	10414	0	10414	GEFOS_BMD_EUR_2017
rs12700667	chr7:25901639	chr7:25862019	A	G	rs12700667	chr7:25901639	chr7:25862019	A	G	0	1	Comparative height size at age 10	Neale B	UKBB	European	2017	-0.0109	0.001894	8.624e-09	-	332021	0	332021	Neale-B_UKBB_EUR_2017
rs12700667	chr7:25901639	chr7:25862019	A	G	rs4722531	chr7:25888015	chr7:25848395	T	C	1	0.90766	Comparative height size at age 10	Neale B	UKBB	European	2017	-0.01055	0.001917	3.716e-08	-	332021	0	332021	Neale-B_UKBB_EUR_2017
rs12700667	chr7:25901639	chr7:25862019	A	G	rs6461887	chr7:25885411	chr7:25845791	C	T	1	0.90758	Comparative height size at age 10	Neale B	UKBB	European	2017	-0.01066	0.001918	2.731e-08	-	332021	0	332021	Neale-B_UKBB_EUR_2017
rs12700667	chr7:25901639	chr7:25862019	A	G	rs979165	chr7:25886478	chr7:25846858	T	G	1	0.90758	Comparative height size at age 10	Neale B	UKBB	European	2017	-0.01072	0.001917	2.198e-08	-	332021	0	332021	Neale-B_UKBB_EUR_2017
rs12700667	chr7:25901639	chr7:25862019	A	G	rs1451385	chr7:25894721	chr7:25855101	C	T	1	0.89802	Comparative height size at age 10	Neale B	UKBB	European	2017	-0.01065	0.001917	2.754e-08	-	332021	0	332021	Neale-B_UKBB_EUR_2017
rs71575922	chr6:152554014	chr6:152232879	C	G	rs71575922	chr6:152554014	chr6:152232879	C	G	0	1	Comparative height size at age 10	Neale B	UKBB	European	2017	0.01041	0.002295	5.767e-06	+	332021	0	332021	Neale-B_UKBB_EUR_2017
rs71575922	chr6:152554014	chr6:152232879	C	G	rs58415480	chr6:152562271	chr6:152241136	C	G	1	0.91214	Comparative height size at age 10	Neale B	UKBB	European	2017	0.01071	0.00231	3.531e-06	+	332021	0	332021	Neale-B_UKBB_EUR_2017
rs71575922	chr6:152554014	chr6:152232879	C	G	rs13206305	chr6:152549309	chr6:152228174	C	T	1	0.81447	Comparative height size at age 10	Neale B	UKBB	European	2017	0.009515	0.00211	6.508e-06	+	332021	0	332021	Neale-B_UKBB_EUR_2017
rs71575922	chr6:152554014	chr6:152232879	C	G	rs12110479	chr6:152554396	chr6:152233261	C	T	1	0.8038	Comparative height size at age 10	Neale B	UKBB	European	2017	0.01027	0.002116	1.217e-06	+	332021	0	332021	Neale-B_UKBB_EUR_2017
rs71575922	chr6:152554014	chr6:152232879	C	G	rs35764603	chr6:152554737	chr6:152233602	G	A	1	0.8038	Comparative height size at age 10	Neale B	UKBB	European	2017	0.01027	0.002115	1.209e-06	+	332021	0	332021	Neale-B_UKBB_EUR_2017
rs12700667	chr7:25901639	chr7:25862019	A	G	rs12700667	chr7:25901639	chr7:25862019	A	G	0	1	Deep ovarian andor rectovaginal disease with dense adhesions	Uimari O	28333195	European	2017	NA	NA	2e-09	NA	-	-	-	NHGRI-EBI_GWAS_Catalog
rs10167914	chr2:113563361	chr2:112805784	A	G	rs10167914	chr2:113563361	chr2:112805784	A	G	0	1	Endometriosis	Sapkota Y	28537267	Mixed	2017	-0.1044	0.01914	5e-08	-	-	-	-	NHGRI-EBI_GWAS_Catalog
rs10167914	chr2:113563361	chr2:112805784	A	G	rs10167914	chr2:113563361	chr2:112805784	A	G	0	1	Endometriosis	Sapkota Y	28537267	Mixed	2017	-0.1133	0.01855	1e-09	-	-	-	-	NHGRI-EBI_GWAS_Catalog
rs11674184	chr2:11721535	chr2:11581409	G	T	rs11674184	chr2:11721535	chr2:11581409	G	T	0	1	Endometriosis	Sapkota Y	28537267	Mixed	2017	-0.1222	0.01447	3e-17	-	-	-	-	NHGRI-EBI_GWAS_Catalog
rs11674184	chr2:11721535	chr2:11581409	G	T	rs11674184	chr2:11721535	chr2:11581409	G	T	0	1	Endometriosis	Sapkota Y	28537267	Mixed	2017	-0.1133	0.01491	3e-14	-	-	-	-	NHGRI-EBI_GWAS_Catalog
rs12037376	chr1:22462111	chr1:22135618	A	G	rs12037376	chr1:22462111	chr1:22135618	A	G	0	1	Endometriosis	Albertsen HM	23472165	European	2013	NA	NA	4.22e-08	NA	14174	-	-	GRASP
rs12037376	chr1:22462111	chr1:22135618	A	G	rs12037376	chr1:22462111	chr1:22135618	A	G	0	1	Endometriosis	Sapkota Y	28537267	Mixed	2017	0.1484	0.01784	9e-17	+	-	-	-	NHGRI-EBI_GWAS_Catalog
rs12037376	chr1:22462111	chr1:22135618	A	G	rs12037376	chr1:22462111	chr1:22135618	A	G	0	1	Endometriosis	Sapkota Y	28537267	Mixed	2017	0.131	0.01838	1e-12	+	-	-	-	NHGRI-EBI_GWAS_Catalog
rs12037376	chr1:22462111	chr1:22135618	A	G	rs12037376	chr1:22462111	chr1:22135618	A	G	0	1	Endometriosis	Sapkota Y	28537267	Mixed	2017	0.2469	0.05193	2e-06	+	-	-	-	NHGRI-EBI_GWAS_Catalog
rs12037376	chr1:22462111	chr1:22135618	A	G	rs61768001	chr1:22465820	chr1:22139327	C	T	1	0.98377	Endometriosis	Albertsen HM	23472165	European	2013	NA	NA	2.48e-08	NA	14174	-	-	GRASP
rs12037376	chr1:22462111	chr1:22135618	A	G	rs3820282	chr1:22468215	chr1:22141722	T	C	1	0.98377	Endometriosis	Nyholt DR	23104006	Mixed	2012	NA	NA	1.6e-10	NA	13997	-	-	GRASP
rs12037376	chr1:22462111	chr1:22135618	A	G	rs3820282	chr1:22468215	chr1:22141722	T	C	1	0.98377	Endometriosis	Albertsen HM	23472165	European	2013	NA	NA	2.66e-08	NA	14174	-	-	GRASP
rs12037376	chr1:22462111	chr1:22135618	A	G	rs10917151	chr1:22422721	chr1:22096228	A	G	1	0.91394	Endometriosis	Albertsen HM	23472165	European	2013	NA	NA	5.63e-10	NA	14174	-	-	GRASP
rs12037376	chr1:22462111	chr1:22135618	A	G	rs10917151	chr1:22422721	chr1:22096228	A	G	1	0.91394	Endometriosis	Albertsen HM	23472165	European	2013	NA	NA	7e-09	NA	-	-	-	NHGRI-EBI_GWAS_Catalog
rs12037376	chr1:22462111	chr1:22135618	A	G	rs10917151	chr1:22422721	chr1:22096228	A	G	1	0.91394	Endometriosis	Albertsen HM	23472165	European	2013	NA	NA	6e-06	NA	-	-	-	NHGRI-EBI_GWAS_Catalog
rs12037376	chr1:22462111	chr1:22135618	A	G	rs10917151	chr1:22422721	chr1:22096228	A	G	1	0.91394	Endometriosis	Albertsen HM	23472165	European	2013	NA	NA	8e-07	NA	-	-	-	NHGRI-EBI_GWAS_Catalog
rs12037376	chr1:22462111	chr1:22135618	A	G	rs56318008	chr1:22470407	chr1:22143914	T	C	1	0.91134	Endometriosis	Nyholt DR	23104006	Mixed	2012	NA	NA	1.3e-10	NA	13997	-	-	GRASP
rs12037376	chr1:22462111	chr1:22135618	A	G	rs56318008	chr1:22470407	chr1:22143914	T	C	1	0.91134	Endometriosis	Albertsen HM	23472165	European	2013	NA	NA	2.93e-08	NA	14174	-	-	GRASP
rs12700667	chr7:25901639	chr7:25862019	A	G	rs12700667	chr7:25901639	chr7:25862019	A	G	0	1	Endometriosis	Painter JN	21151130	European	2010	NA	NA	1.4e-09	NA	10254	-	-	GRASP
rs12700667	chr7:25901639	chr7:25862019	A	G	rs12700667	chr7:25901639	chr7:25862019	A	G	0	1	Endometriosis	Nyholt DR	23104006	Mixed	2012	NA	NA	3.8e-11	NA	13997	-	-	GRASP
rs12700667	chr7:25901639	chr7:25862019	A	G	rs12700667	chr7:25901639	chr7:25862019	A	G	0	1	Endometriosis	Painter JN	21151130	European	2010	0.1823	0.02984	1e-09	+	-	-	-	NHGRI-EBI_GWAS_Catalog
rs12700667	chr7:25901639	chr7:25862019	A	G	rs12700667	chr7:25901639	chr7:25862019	A	G	0	1	Endometriosis	Nyholt DR	23104006	Mixed	2012	0.1655	0.02813	4e-09	+	-	-	-	NHGRI-EBI_GWAS_Catalog
rs12700667	chr7:25901639	chr7:25862019	A	G	rs12700667	chr7:25901639	chr7:25862019	A	G	0	1	Endometriosis	Uimari O	28333195	European	2017	NA	NA	6e-07	NA	-	-	-	NHGRI-EBI_GWAS_Catalog
rs12700667	chr7:25901639	chr7:25862019	A	G	rs12700667	chr7:25901639	chr7:25862019	A	G	0	1	Endometriosis	Sapkota Y	28537267	Mixed	2017	0.09531	0.01556	9e-10	+	-	-	-	NHGRI-EBI_GWAS_Catalog
rs12700667	chr7:25901639	chr7:25862019	A	G	rs12700667	chr7:25901639	chr7:25862019	A	G	0	1	Endometriosis	Sapkota Y	28537267	Mixed	2017	0.08618	0.01536	2e-08	+	-	-	-	NHGRI-EBI_GWAS_Catalog
rs12700667	chr7:25901639	chr7:25862019	A	G	rs12700667	chr7:25901639	chr7:25862019	A	G	0	1	Endometriosis	Painter JN	21151130	European	2010	NA	NA	1e-09	NA	-	-	-	dbGaP
rs1537377	chr9:22169700	chr9:22169701	C	T	rs1537377	chr9:22169700	chr9:22169701	C	T	0	1	Endometriosis	Nyholt DR	23104006	Mixed	2012	NA	NA	5.8e-12	NA	13997	-	-	GRASP
rs1537377	chr9:22169700	chr9:22169701	C	T	rs1537377	chr9:22169700	chr9:22169701	C	T	0	1	Endometriosis	Nyholt DR	23104006	Mixed	2012	0.1398	0.0233	2e-09	+	-	-	-	NHGRI-EBI_GWAS_Catalog
rs1537377	chr9:22169700	chr9:22169701	C	T	rs1537377	chr9:22169700	chr9:22169701	C	T	0	1	Endometriosis	Sapkota Y	28537267	Mixed	2017	0.08618	0.01333	1e-10	+	-	-	-	NHGRI-EBI_GWAS_Catalog
rs1537377	chr9:22169700	chr9:22169701	C	T	rs1537377	chr9:22169700	chr9:22169701	C	T	0	1	Endometriosis	Sapkota Y	28537267	Mixed	2017	0.07696	0.01371	2e-08	+	-	-	-	NHGRI-EBI_GWAS_Catalog
rs1903068	chr4:56008477	chr4:55142310	G	A	rs1903068	chr4:56008477	chr4:55142310	G	A	0	1	Endometriosis	Sapkota Y	28537267	Mixed	2017	-0.1044	0.01556	2e-11	-	-	-	-	NHGRI-EBI_GWAS_Catalog
rs1903068	chr4:56008477	chr4:55142310	G	A	rs1903068	chr4:56008477	chr4:55142310	G	A	0	1	Endometriosis	Sapkota Y	28537267	Mixed	2017	-0.1044	0.01533	1e-11	-	-	-	-	NHGRI-EBI_GWAS_Catalog
rs4762326	chr12:95668951	chr12:95275175	C	T	rs4762326	chr12:95668951	chr12:95275175	C	T	0	1	Endometriosis	Sapkota Y	28537267	Mixed	2017	-0.06766	0.01383	1e-06	-	-	-	-	NHGRI-EBI_GWAS_Catalog
rs4762326	chr12:95668951	chr12:95275175	C	T	rs4762326	chr12:95668951	chr12:95275175	C	T	0	1	Endometriosis	Sapkota Y	28537267	Mixed	2017	-0.07696	0.01283	2e-09	-	-	-	-	NHGRI-EBI_GWAS_Catalog
rs4762326	chr12:95668951	chr12:95275175	C	T	rs4762326	chr12:95668951	chr12:95275175	C	T	0	1	Endometriosis	Sapkota Y	28537267	Mixed	2017	0.1989	0.04312	4e-06	+	-	-	-	NHGRI-EBI_GWAS_Catalog
rs6546324	chr2:67856490	chr2:67629358	A	C	rs6546324	chr2:67856490	chr2:67629358	A	C	0	1	Endometriosis	Sapkota Y	28537267	Mixed	2017	0.07696	0.01502	3e-07	+	-	-	-	NHGRI-EBI_GWAS_Catalog
rs6546324	chr2:67856490	chr2:67629358	A	C	rs6546324	chr2:67856490	chr2:67629358	A	C	0	1	Endometriosis	Sapkota Y	28537267	Mixed	2017	0.07696	0.01389	3e-08	+	-	-	-	NHGRI-EBI_GWAS_Catalog
rs6546324	chr2:67856490	chr2:67629358	A	C	rs4141819	chr2:67864675	chr2:67637543	C	T	1	0.98155	Endometriosis	Nyholt DR	23104006	Mixed	2012	NA	NA	4.1e-08	NA	13997	-	-	GRASP
rs6546324	chr2:67856490	chr2:67629358	A	C	rs4141819	chr2:67864675	chr2:67637543	C	T	1	0.98155	Endometriosis	Nyholt DR	23104006	Mixed	2012	0.1398	0.02614	9e-08	+	-	-	-	NHGRI-EBI_GWAS_Catalog
rs71575922	chr6:152554014	chr6:152232879	C	G	rs71575922	chr6:152554014	chr6:152232879	C	G	0	1	Endometriosis	Sapkota Y	28537267	Mixed	2017	-0.1044	0.0186	2e-08	-	-	-	-	NHGRI-EBI_GWAS_Catalog
rs71575922	chr6:152554014	chr6:152232879	C	G	rs12110479	chr6:152554396	chr6:152233261	C	T	1	0.8038	Endometriosis	Painter JN	21151130	European	2010	NA	NA	9.9e-06	NA	10254	-	-	GRASP
rs74485684	chr11:30242287	chr11:30220740	C	T	rs74485684	chr11:30242287	chr11:30220740	C	T	0	1	Endometriosis	Sapkota Y	28537267	Mixed	2017	-0.1044	0.0186	2e-08	-	-	-	-	NHGRI-EBI_GWAS_Catalog
rs74485684	chr11:30242287	chr11:30220740	C	T	rs74485684	chr11:30242287	chr11:30220740	C	T	0	1	Endometriosis	Sapkota Y	28537267	Mixed	2017	-0.1044	0.01883	3e-08	-	-	-	-	NHGRI-EBI_GWAS_Catalog
rs760794	chr6:19790560	chr6:19790329	T	C	rs760794	chr6:19790560	chr6:19790329	T	C	0	1	Endometriosis	Albertsen HM	23472165	European	2013	NA	NA	1.88e-06	NA	14174	-	-	GRASP
rs760794	chr6:19790560	chr6:19790329	T	C	rs760794	chr6:19790560	chr6:19790329	T	C	0	1	Endometriosis	Sapkota Y	28537267	Mixed	2017	0.07696	0.01428	7e-08	+	-	-	-	NHGRI-EBI_GWAS_Catalog
rs760794	chr6:19790560	chr6:19790329	T	C	rs760794	chr6:19790560	chr6:19790329	T	C	0	1	Endometriosis	Sapkota Y	28537267	Mixed	2017	0.08618	0.01355	2e-10	+	-	-	-	NHGRI-EBI_GWAS_Catalog
rs760794	chr6:19790560	chr6:19790329	T	C	rs760796	chr6:19790387	chr6:19790156	T	C	1	1	Endometriosis	Albertsen HM	23472165	European	2013	NA	NA	3.34e-06	NA	14174	-	-	GRASP
rs760794	chr6:19790560	chr6:19790329	T	C	rs2223361	chr6:19790809	chr6:19790578	T	C	1	1	Endometriosis	Nyholt DR	23104006	Mixed	2012	NA	NA	9.2e-08	NA	13997	-	-	GRASP
rs760794	chr6:19790560	chr6:19790329	T	C	rs2223361	chr6:19790809	chr6:19790578	T	C	1	1	Endometriosis	Albertsen HM	23472165	European	2013	NA	NA	2.44e-06	NA	14174	-	-	GRASP
rs760794	chr6:19790560	chr6:19790329	T	C	rs6456266	chr6:19791284	chr6:19791053	T	C	1	1	Endometriosis	Albertsen HM	23472165	European	2013	NA	NA	3.53e-06	NA	14174	-	-	GRASP
rs12700667	chr7:25901639	chr7:25862019	A	G	rs12700667	chr7:25901639	chr7:25862019	A	G	0	1	Endometriosis Stage III or IV disease	Painter JN	21151130	European	2010	NA	NA	1.5e-09	NA	10254	-	-	GRASP
rs12037376	chr1:22462111	chr1:22135618	A	G	rs3820282	chr1:22468215	chr1:22141722	T	C	1	0.98377	Epithelial ovarian cancer	Kuchenbaecker KB	25581431	European	2015	NA	NA	8e-08	NA	-	-	-	NHGRI-EBI_GWAS_Catalog
rs12037376	chr1:22462111	chr1:22135618	A	G	rs3820282	chr1:22468215	chr1:22141722	T	C	1	0.98377	Epithelial ovarian cancer	Kuchenbaecker KB	25581431	European	2015	NA	NA	2e-08	NA	-	-	-	NHGRI-EBI_GWAS_Catalog
rs71575922	chr6:152554014	chr6:152232879	C	G	rs71575922	chr6:152554014	chr6:152232879	C	G	0	1	Ever had hysterectomy	Neale B	UKBB	European	2017	-0.006426	0.00135	1.94e-06	-	159679	13060	146619	Neale-B_UKBB_EUR_2017
rs71575922	chr6:152554014	chr6:152232879	C	G	rs58415480	chr6:152562271	chr6:152241136	C	G	1	0.91214	Ever had hysterectomy	Neale B	UKBB	European	2017	-0.006793	0.00136	5.84e-07	-	159679	13060	146619	Neale-B_UKBB_EUR_2017
rs74485684	chr11:30242287	chr11:30220740	C	T	rs74485684	chr11:30242287	chr11:30220740	C	T	0	1	Ever had hysterectomy	Neale B	UKBB	European	2017	-0.006113	0.001315	3.327e-06	-	159679	13060	146619	Neale-B_UKBB_EUR_2017
rs74485684	chr11:30242287	chr11:30220740	C	T	rs75525300	chr11:30307989	chr11:30286442	G	A	1	1	Ever had hysterectomy	Neale B	UKBB	European	2017	-0.006106	0.001314	3.349e-06	-	159679	13060	146619	Neale-B_UKBB_EUR_2017
rs74485684	chr11:30242287	chr11:30220740	C	T	rs12278989	chr11:30316822	chr11:30295275	G	A	1	1	Ever had hysterectomy	Neale B	UKBB	European	2017	-0.006099	0.001313	3.424e-06	-	159679	13060	146619	Neale-B_UKBB_EUR_2017
rs74485684	chr11:30242287	chr11:30220740	C	T	rs11031040	chr11:30317733	chr11:30296186	G	T	1	1	Ever had hysterectomy	Neale B	UKBB	European	2017	-0.006099	0.001313	3.423e-06	-	159679	13060	146619	Neale-B_UKBB_EUR_2017
rs74485684	chr11:30242287	chr11:30220740	C	T	rs12271187	chr11:30319259	chr11:30297712	A	G	1	1	Ever had hysterectomy	Neale B	UKBB	European	2017	-0.006099	0.001313	3.422e-06	-	159679	13060	146619	Neale-B_UKBB_EUR_2017
rs74485684	chr11:30242287	chr11:30220740	C	T	rs74485684	chr11:30242287	chr11:30220740	C	T	0	1	Excessive, frequent and irregular menstruation	Neale B	UKBB	European	2017	-0.002517	0.0004647	6.076e-08	-	337199	6882	330317	Neale-B_UKBB_EUR_2017
rs74485684	chr11:30242287	chr11:30220740	C	T	rs75525300	chr11:30307989	chr11:30286442	G	A	1	1	Excessive, frequent and irregular menstruation	Neale B	UKBB	European	2017	-0.002545	0.0004643	4.193e-08	-	337199	6882	330317	Neale-B_UKBB_EUR_2017
rs74485684	chr11:30242287	chr11:30220740	C	T	rs12278989	chr11:30316822	chr11:30295275	G	A	1	1	Excessive, frequent and irregular menstruation	Neale B	UKBB	European	2017	-0.002555	0.0004642	3.704e-08	-	337199	6882	330317	Neale-B_UKBB_EUR_2017
rs74485684	chr11:30242287	chr11:30220740	C	T	rs11031040	chr11:30317733	chr11:30296186	G	T	1	1	Excessive, frequent and irregular menstruation	Neale B	UKBB	European	2017	-0.002555	0.0004642	3.702e-08	-	337199	6882	330317	Neale-B_UKBB_EUR_2017
rs74485684	chr11:30242287	chr11:30220740	C	T	rs12271187	chr11:30319259	chr11:30297712	A	G	1	1	Excessive, frequent and irregular menstruation	Neale B	UKBB	European	2017	-0.002555	0.0004642	3.702e-08	-	337199	6882	330317	Neale-B_UKBB_EUR_2017
rs12037376	chr1:22462111	chr1:22135618	A	G	rs12037376	chr1:22462111	chr1:22135618	A	G	0	1	Female genital prolapse	Neale B	UKBB	European	2017	-0.002753	0.0003961	3.646e-12	-	337199	4840	332359	Neale-B_UKBB_EUR_2017
rs12037376	chr1:22462111	chr1:22135618	A	G	rs61768001	chr1:22465820	chr1:22139327	C	T	1	0.98377	Female genital prolapse	Neale B	UKBB	European	2017	-0.002803	0.0003948	1.258e-12	-	337199	4840	332359	Neale-B_UKBB_EUR_2017
rs12037376	chr1:22462111	chr1:22135618	A	G	rs3820282	chr1:22468215	chr1:22141722	T	C	1	0.98377	Female genital prolapse	Neale B	UKBB	European	2017	-0.002785	0.0003948	1.74e-12	-	337199	4840	332359	Neale-B_UKBB_EUR_2017
rs12037376	chr1:22462111	chr1:22135618	A	G	rs10917151	chr1:22422721	chr1:22096228	A	G	1	0.91394	Female genital prolapse	Neale B	UKBB	European	2017	-0.002628	0.0003895	1.524e-11	-	337199	4840	332359	Neale-B_UKBB_EUR_2017
rs12037376	chr1:22462111	chr1:22135618	A	G	rs56318008	chr1:22470407	chr1:22143914	T	C	1	0.91134	Female genital prolapse	Neale B	UKBB	European	2017	-0.002838	0.0004055	2.614e-12	-	337199	4840	332359	Neale-B_UKBB_EUR_2017
rs12037376	chr1:22462111	chr1:22135618	A	G	rs56318008	chr1:22470407	chr1:22143914	T	C	1	0.91134	Forced expiratory volume in 1-second	Neale B	UKBB	European	2017	0.01396	0.002927	1.828e-06	+	307638	0	307638	Neale-B_UKBB_EUR_2017
rs12037376	chr1:22462111	chr1:22135618	A	G	rs12037376	chr1:22462111	chr1:22135618	A	G	0	1	Forced expiratory volume in 1-second, best measure	Neale B	UKBB	European	2017	0.01548	0.003141	8.331e-07	+	255492	0	255492	Neale-B_UKBB_EUR_2017
rs12037376	chr1:22462111	chr1:22135618	A	G	rs61768001	chr1:22465820	chr1:22139327	C	T	1	0.98377	Forced expiratory volume in 1-second, best measure	Neale B	UKBB	European	2017	0.0152	0.003132	1.219e-06	+	255492	0	255492	Neale-B_UKBB_EUR_2017
rs12037376	chr1:22462111	chr1:22135618	A	G	rs3820282	chr1:22468215	chr1:22141722	T	C	1	0.98377	Forced expiratory volume in 1-second, best measure	Neale B	UKBB	European	2017	0.01499	0.003131	1.688e-06	+	255492	0	255492	Neale-B_UKBB_EUR_2017
rs12037376	chr1:22462111	chr1:22135618	A	G	rs10917151	chr1:22422721	chr1:22096228	A	G	1	0.91394	Forced expiratory volume in 1-second, best measure	Neale B	UKBB	European	2017	0.01576	0.00309	3.374e-07	+	255492	0	255492	Neale-B_UKBB_EUR_2017
rs12037376	chr1:22462111	chr1:22135618	A	G	rs56318008	chr1:22470407	chr1:22143914	T	C	1	0.91134	Forced expiratory volume in 1-second, best measure	Neale B	UKBB	European	2017	0.01817	0.003216	1.598e-08	+	255492	0	255492	Neale-B_UKBB_EUR_2017
rs12037376	chr1:22462111	chr1:22135618	A	G	rs12037376	chr1:22462111	chr1:22135618	A	G	0	1	Forced vital capacity	Neale B	UKBB	European	2017	0.01693	0.002711	4.259e-10	+	307638	0	307638	Neale-B_UKBB_EUR_2017
rs12037376	chr1:22462111	chr1:22135618	A	G	rs61768001	chr1:22465820	chr1:22139327	C	T	1	0.98377	Forced vital capacity	Neale B	UKBB	European	2017	0.0165	0.002702	1.02e-09	+	307638	0	307638	Neale-B_UKBB_EUR_2017
rs12037376	chr1:22462111	chr1:22135618	A	G	rs3820282	chr1:22468215	chr1:22141722	T	C	1	0.98377	Forced vital capacity	Neale B	UKBB	European	2017	0.01629	0.002702	1.643e-09	+	307638	0	307638	Neale-B_UKBB_EUR_2017
rs12037376	chr1:22462111	chr1:22135618	A	G	rs10917151	chr1:22422721	chr1:22096228	A	G	1	0.91394	Forced vital capacity	Neale B	UKBB	European	2017	0.01655	0.002666	5.445e-10	+	307638	0	307638	Neale-B_UKBB_EUR_2017
rs12037376	chr1:22462111	chr1:22135618	A	G	rs56318008	chr1:22470407	chr1:22143914	T	C	1	0.91134	Forced vital capacity	Neale B	UKBB	European	2017	0.01847	0.002775	2.799e-11	+	307638	0	307638	Neale-B_UKBB_EUR_2017
rs12037376	chr1:22462111	chr1:22135618	A	G	rs12037376	chr1:22462111	chr1:22135618	A	G	0	1	Forced vital capacity, best measure	Neale B	UKBB	European	2017	0.01906	0.002974	1.488e-10	+	255492	0	255492	Neale-B_UKBB_EUR_2017
rs12037376	chr1:22462111	chr1:22135618	A	G	rs61768001	chr1:22465820	chr1:22139327	C	T	1	0.98377	Forced vital capacity, best measure	Neale B	UKBB	European	2017	0.01869	0.002965	2.945e-10	+	255492	0	255492	Neale-B_UKBB_EUR_2017
rs12037376	chr1:22462111	chr1:22135618	A	G	rs3820282	chr1:22468215	chr1:22141722	T	C	1	0.98377	Forced vital capacity, best measure	Neale B	UKBB	European	2017	0.01855	0.002965	3.947e-10	+	255492	0	255492	Neale-B_UKBB_EUR_2017
rs12037376	chr1:22462111	chr1:22135618	A	G	rs10917151	chr1:22422721	chr1:22096228	A	G	1	0.91394	Forced vital capacity, best measure	Neale B	UKBB	European	2017	0.01922	0.002925	5.069e-11	+	255492	0	255492	Neale-B_UKBB_EUR_2017
rs12037376	chr1:22462111	chr1:22135618	A	G	rs56318008	chr1:22470407	chr1:22143914	T	C	1	0.91134	Forced vital capacity, best measure	Neale B	UKBB	European	2017	0.02169	0.003045	1.054e-12	+	255492	0	255492	Neale-B_UKBB_EUR_2017
rs12037376	chr1:22462111	chr1:22135618	A	G	rs56318008	chr1:22470407	chr1:22143914	T	C	1	0.91134	Gestational age at birth maternal effect	Zhang G	28877031	European	2017	1.05	0.1382	3e-14	+	-	-	-	NHGRI-EBI_GWAS_Catalog
rs1537377	chr9:22169700	chr9:22169701	C	T	rs1537377	chr9:22169700	chr9:22169701	C	T	0	1	Granulocyte percentage of myeloid white cells	Astle W	27863252	European	2016	-0.01792	0.003641	8.642e-07	-	173480	0	173480	Astle-W_Blood-Cell-Traits_EUR_2016
rs1537377	chr9:22169700	chr9:22169701	C	T	rs5896970	chr9:22170023	chr9:22170024	G	GC	1	1	Granulocyte percentage of myeloid white cells	Astle W	27863252	European	2016	-0.01802	0.003654	8.137e-07	-	173480	0	173480	Astle-W_Blood-Cell-Traits_EUR_2016
rs1537377	chr9:22169700	chr9:22169701	C	T	rs10811669	chr9:22172893	chr9:22172894	C	T	1	0.97072	Granulocyte percentage of myeloid white cells	Astle W	27863252	European	2016	-0.01805	0.00366	8.147e-07	-	173480	0	173480	Astle-W_Blood-Cell-Traits_EUR_2016
rs1537377	chr9:22169700	chr9:22169701	C	T	rs9987548	chr9:22173075	chr9:22173076	A	T	1	0.97072	Granulocyte percentage of myeloid white cells	Astle W	27863252	European	2016	-0.01783	0.00366	1.099e-06	-	173480	0	173480	Astle-W_Blood-Cell-Traits_EUR_2016
rs12037376	chr1:22462111	chr1:22135618	A	G	rs12037376	chr1:22462111	chr1:22135618	A	G	0	1	Heel bone mineral density	Neale B	UKBB	European	2017	-0.03865	0.004265	1.272e-19	-	194398	0	194398	Neale-B_UKBB_EUR_2017
rs12037376	chr1:22462111	chr1:22135618	A	G	rs61768001	chr1:22465820	chr1:22139327	C	T	1	0.98377	Heel bone mineral density	Neale B	UKBB	European	2017	-0.03884	0.004252	6.588e-20	-	194398	0	194398	Neale-B_UKBB_EUR_2017
rs12037376	chr1:22462111	chr1:22135618	A	G	rs3820282	chr1:22468215	chr1:22141722	T	C	1	0.98377	Heel bone mineral density	Neale B	UKBB	European	2017	-0.03902	0.004251	4.48e-20	-	194398	0	194398	Neale-B_UKBB_EUR_2017
rs12037376	chr1:22462111	chr1:22135618	A	G	rs10917151	chr1:22422721	chr1:22096228	A	G	1	0.91394	Heel bone mineral density	Neale B	UKBB	European	2017	-0.03658	0.004195	2.846e-18	-	194398	0	194398	Neale-B_UKBB_EUR_2017
rs12037376	chr1:22462111	chr1:22135618	A	G	rs56318008	chr1:22470407	chr1:22143914	T	C	1	0.91134	Heel bone mineral density	Neale B	UKBB	European	2017	-0.04614	0.004369	4.576e-26	-	194398	0	194398	Neale-B_UKBB_EUR_2017
rs12037376	chr1:22462111	chr1:22135618	A	G	rs12037376	chr1:22462111	chr1:22135618	A	G	0	1	Heel bone mineral density left	Neale B	UKBB	European	2017	-0.03609	0.005744	3.321e-10	-	106254	0	106254	Neale-B_UKBB_EUR_2017
rs12037376	chr1:22462111	chr1:22135618	A	G	rs61768001	chr1:22465820	chr1:22139327	C	T	1	0.98377	Heel bone mineral density left	Neale B	UKBB	European	2017	-0.03759	0.005724	5.144e-11	-	106254	0	106254	Neale-B_UKBB_EUR_2017
rs12037376	chr1:22462111	chr1:22135618	A	G	rs3820282	chr1:22468215	chr1:22141722	T	C	1	0.98377	Heel bone mineral density left	Neale B	UKBB	European	2017	-0.03792	0.005722	3.433e-11	-	106254	0	106254	Neale-B_UKBB_EUR_2017
rs12037376	chr1:22462111	chr1:22135618	A	G	rs10917151	chr1:22422721	chr1:22096228	A	G	1	0.91394	Heel bone mineral density left	Neale B	UKBB	European	2017	-0.03549	0.005645	3.262e-10	-	106254	0	106254	Neale-B_UKBB_EUR_2017
rs12037376	chr1:22462111	chr1:22135618	A	G	rs56318008	chr1:22470407	chr1:22143914	T	C	1	0.91134	Heel bone mineral density left	Neale B	UKBB	European	2017	-0.04103	0.005874	2.851e-12	-	106254	0	106254	Neale-B_UKBB_EUR_2017
rs12037376	chr1:22462111	chr1:22135618	A	G	rs12037376	chr1:22462111	chr1:22135618	A	G	0	1	Heel bone mineral density right	Neale B	UKBB	European	2017	-0.03634	0.005711	1.974e-10	-	106251	0	106251	Neale-B_UKBB_EUR_2017
rs12037376	chr1:22462111	chr1:22135618	A	G	rs61768001	chr1:22465820	chr1:22139327	C	T	1	0.98377	Heel bone mineral density right	Neale B	UKBB	European	2017	-0.03779	0.00569	3.106e-11	-	106251	0	106251	Neale-B_UKBB_EUR_2017
rs12037376	chr1:22462111	chr1:22135618	A	G	rs3820282	chr1:22468215	chr1:22141722	T	C	1	0.98377	Heel bone mineral density right	Neale B	UKBB	European	2017	-0.03789	0.005689	2.731e-11	-	106251	0	106251	Neale-B_UKBB_EUR_2017
rs12037376	chr1:22462111	chr1:22135618	A	G	rs10917151	chr1:22422721	chr1:22096228	A	G	1	0.91394	Heel bone mineral density right	Neale B	UKBB	European	2017	-0.03499	0.005611	4.515e-10	-	106251	0	106251	Neale-B_UKBB_EUR_2017
rs12037376	chr1:22462111	chr1:22135618	A	G	rs56318008	chr1:22470407	chr1:22143914	T	C	1	0.91134	Heel bone mineral density right	Neale B	UKBB	European	2017	-0.0419	0.00584	7.269e-13	-	106251	0	106251	Neale-B_UKBB_EUR_2017
rs12037376	chr1:22462111	chr1:22135618	A	G	rs56318008	chr1:22470407	chr1:22143914	T	C	1	0.91134	Height	Neale B	UKBB	European	2017	0.01256	0.00243	2.36e-07	+	336474	0	336474	Neale-B_UKBB_EUR_2017
rs12700667	chr7:25901639	chr7:25862019	A	G	rs12700667	chr7:25901639	chr7:25862019	A	G	0	1	Height	GIANT	28146470	European	2017	-0.017	0.0028	4.9e-09	-	381625	0	381625	GIANT_Height_EUR_2017
rs12700667	chr7:25901639	chr7:25862019	A	G	rs12700667	chr7:25901639	chr7:25862019	A	G	0	1	Height	GIANT	28146470	Mixed	2017	-0.015	0.0025	2.5e-09	-	458927	0	458927	GIANT_Height_Mixed_2017
rs12700667	chr7:25901639	chr7:25862019	A	G	rs12700667	chr7:25901639	chr7:25862019	A	G	0	1	Height	Neale B	UKBB	European	2017	-0.01588	0.001971	7.856e-16	-	336474	0	336474	Neale-B_UKBB_EUR_2017
rs12700667	chr7:25901639	chr7:25862019	A	G	rs4722531	chr7:25888015	chr7:25848395	T	C	1	0.90766	Height	Neale B	UKBB	European	2017	-0.01601	0.001995	1.032e-15	-	336474	0	336474	Neale-B_UKBB_EUR_2017
rs12700667	chr7:25901639	chr7:25862019	A	G	rs6461887	chr7:25885411	chr7:25845791	C	T	1	0.90758	Height	Neale B	UKBB	European	2017	-0.01597	0.001996	1.248e-15	-	336474	0	336474	Neale-B_UKBB_EUR_2017
rs12700667	chr7:25901639	chr7:25862019	A	G	rs979165	chr7:25886478	chr7:25846858	T	G	1	0.90758	Height	Neale B	UKBB	European	2017	-0.01601	0.001995	1.017e-15	-	336474	0	336474	Neale-B_UKBB_EUR_2017
rs12700667	chr7:25901639	chr7:25862019	A	G	rs1451385	chr7:25894721	chr7:25855101	C	T	1	0.89802	Height	Neale B	UKBB	European	2017	-0.01602	0.001995	9.763e-16	-	336474	0	336474	Neale-B_UKBB_EUR_2017
rs74485684	chr11:30242287	chr11:30220740	C	T	rs74485684	chr11:30242287	chr11:30220740	C	T	0	1	Height	Neale B	UKBB	European	2017	0.01074	0.002349	4.813e-06	+	336474	0	336474	Neale-B_UKBB_EUR_2017
rs74485684	chr11:30242287	chr11:30220740	C	T	rs75525300	chr11:30307989	chr11:30286442	G	A	1	1	Height	Neale B	UKBB	European	2017	0.01073	0.002347	4.8e-06	+	336474	0	336474	Neale-B_UKBB_EUR_2017
rs74485684	chr11:30242287	chr11:30220740	C	T	rs12278989	chr11:30316822	chr11:30295275	G	A	1	1	Height	Neale B	UKBB	European	2017	0.01075	0.002346	4.596e-06	+	336474	0	336474	Neale-B_UKBB_EUR_2017
rs74485684	chr11:30242287	chr11:30220740	C	T	rs11031040	chr11:30317733	chr11:30296186	G	T	1	1	Height	Neale B	UKBB	European	2017	0.01075	0.002346	4.594e-06	+	336474	0	336474	Neale-B_UKBB_EUR_2017
rs74485684	chr11:30242287	chr11:30220740	C	T	rs12271187	chr11:30319259	chr11:30297712	A	G	1	1	Height	Neale B	UKBB	European	2017	0.01075	0.002346	4.593e-06	+	336474	0	336474	Neale-B_UKBB_EUR_2017
rs12037376	chr1:22462111	chr1:22135618	A	G	rs12037376	chr1:22462111	chr1:22135618	A	G	0	1	Hip circumference	Neale B	UKBB	European	2017	0.01628	0.003308	8.521e-07	+	336601	0	336601	Neale-B_UKBB_EUR_2017
rs12037376	chr1:22462111	chr1:22135618	A	G	rs61768001	chr1:22465820	chr1:22139327	C	T	1	0.98377	Hip circumference	Neale B	UKBB	European	2017	0.01613	0.003297	1.002e-06	+	336601	0	336601	Neale-B_UKBB_EUR_2017
rs12037376	chr1:22462111	chr1:22135618	A	G	rs3820282	chr1:22468215	chr1:22141722	T	C	1	0.98377	Hip circumference	Neale B	UKBB	European	2017	0.01638	0.003297	6.782e-07	+	336601	0	336601	Neale-B_UKBB_EUR_2017
rs12037376	chr1:22462111	chr1:22135618	A	G	rs10917151	chr1:22422721	chr1:22096228	A	G	1	0.91394	Hip circumference	Neale B	UKBB	European	2017	0.0166	0.003253	3.355e-07	+	336601	0	336601	Neale-B_UKBB_EUR_2017
rs12037376	chr1:22462111	chr1:22135618	A	G	rs56318008	chr1:22470407	chr1:22143914	T	C	1	0.91134	Hip circumference	Neale B	UKBB	European	2017	0.01602	0.003387	2.235e-06	+	336601	0	336601	Neale-B_UKBB_EUR_2017
rs12037376	chr1:22462111	chr1:22135618	A	G	rs12037376	chr1:22462111	chr1:22135618	A	G	0	1	Impedance of leg left	Neale B	UKBB	European	2017	-0.01471	0.003046	1.366e-06	-	331296	0	331296	Neale-B_UKBB_EUR_2017
rs12037376	chr1:22462111	chr1:22135618	A	G	rs61768001	chr1:22465820	chr1:22139327	C	T	1	0.98377	Impedance of leg left	Neale B	UKBB	European	2017	-0.01429	0.003036	2.501e-06	-	331296	0	331296	Neale-B_UKBB_EUR_2017
rs12037376	chr1:22462111	chr1:22135618	A	G	rs3820282	chr1:22468215	chr1:22141722	T	C	1	0.98377	Impedance of leg left	Neale B	UKBB	European	2017	-0.01425	0.003036	2.697e-06	-	331296	0	331296	Neale-B_UKBB_EUR_2017
rs12037376	chr1:22462111	chr1:22135618	A	G	rs10917151	chr1:22422721	chr1:22096228	A	G	1	0.91394	Impedance of leg left	Neale B	UKBB	European	2017	-0.01576	0.002995	1.421e-07	-	331296	0	331296	Neale-B_UKBB_EUR_2017
rs12037376	chr1:22462111	chr1:22135618	A	G	rs56318008	chr1:22470407	chr1:22143914	T	C	1	0.91134	Impedance of leg left	Neale B	UKBB	European	2017	-0.01655	0.003119	1.126e-07	-	331296	0	331296	Neale-B_UKBB_EUR_2017
rs12037376	chr1:22462111	chr1:22135618	A	G	rs12037376	chr1:22462111	chr1:22135618	A	G	0	1	Impedance of leg right	Neale B	UKBB	European	2017	-0.01463	0.003022	1.29e-06	-	331301	0	331301	Neale-B_UKBB_EUR_2017
rs12037376	chr1:22462111	chr1:22135618	A	G	rs61768001	chr1:22465820	chr1:22139327	C	T	1	0.98377	Impedance of leg right	Neale B	UKBB	European	2017	-0.01443	0.003013	1.667e-06	-	331301	0	331301	Neale-B_UKBB_EUR_2017
rs12037376	chr1:22462111	chr1:22135618	A	G	rs3820282	chr1:22468215	chr1:22141722	T	C	1	0.98377	Impedance of leg right	Neale B	UKBB	European	2017	-0.01434	0.003012	1.932e-06	-	331301	0	331301	Neale-B_UKBB_EUR_2017
rs12037376	chr1:22462111	chr1:22135618	A	G	rs10917151	chr1:22422721	chr1:22096228	A	G	1	0.91394	Impedance of leg right	Neale B	UKBB	European	2017	-0.01589	0.002972	8.948e-08	-	331301	0	331301	Neale-B_UKBB_EUR_2017
rs12037376	chr1:22462111	chr1:22135618	A	G	rs56318008	chr1:22470407	chr1:22143914	T	C	1	0.91134	Impedance of leg right	Neale B	UKBB	European	2017	-0.01717	0.003095	2.909e-08	-	331301	0	331301	Neale-B_UKBB_EUR_2017
rs12037376	chr1:22462111	chr1:22135618	A	G	rs3820282	chr1:22468215	chr1:22141722	T	C	1	0.98377	Lean body mass	GEFOS	28743860	European	2017	0.1077	0.01888	1.125e-08	+	10414	0	10414	GEFOS_LBM_EUR_2017
rs12037376	chr1:22462111	chr1:22135618	A	G	rs12037376	chr1:22462111	chr1:22135618	A	G	0	1	Leg fat-free mass left	Neale B	UKBB	European	2017	0.01135	0.0022	2.473e-07	+	331258	0	331258	Neale-B_UKBB_EUR_2017
rs12037376	chr1:22462111	chr1:22135618	A	G	rs61768001	chr1:22465820	chr1:22139327	C	T	1	0.98377	Leg fat-free mass left	Neale B	UKBB	European	2017	0.01109	0.002193	4.27e-07	+	331258	0	331258	Neale-B_UKBB_EUR_2017
rs12037376	chr1:22462111	chr1:22135618	A	G	rs3820282	chr1:22468215	chr1:22141722	T	C	1	0.98377	Leg fat-free mass left	Neale B	UKBB	European	2017	0.01108	0.002192	4.321e-07	+	331258	0	331258	Neale-B_UKBB_EUR_2017
rs12037376	chr1:22462111	chr1:22135618	A	G	rs10917151	chr1:22422721	chr1:22096228	A	G	1	0.91394	Leg fat-free mass left	Neale B	UKBB	European	2017	0.01168	0.002163	6.675e-08	+	331258	0	331258	Neale-B_UKBB_EUR_2017
rs12037376	chr1:22462111	chr1:22135618	A	G	rs56318008	chr1:22470407	chr1:22143914	T	C	1	0.91134	Leg fat-free mass left	Neale B	UKBB	European	2017	0.01257	0.002252	2.385e-08	+	331258	0	331258	Neale-B_UKBB_EUR_2017
rs12037376	chr1:22462111	chr1:22135618	A	G	rs12037376	chr1:22462111	chr1:22135618	A	G	0	1	Leg fat-free mass right	Neale B	UKBB	European	2017	0.0118	0.002199	7.959e-08	+	331285	0	331285	Neale-B_UKBB_EUR_2017
rs12037376	chr1:22462111	chr1:22135618	A	G	rs61768001	chr1:22465820	chr1:22139327	C	T	1	0.98377	Leg fat-free mass right	Neale B	UKBB	European	2017	0.01161	0.002192	1.173e-07	+	331285	0	331285	Neale-B_UKBB_EUR_2017
rs12037376	chr1:22462111	chr1:22135618	A	G	rs3820282	chr1:22468215	chr1:22141722	T	C	1	0.98377	Leg fat-free mass right	Neale B	UKBB	European	2017	0.01156	0.002191	1.322e-07	+	331285	0	331285	Neale-B_UKBB_EUR_2017
rs12037376	chr1:22462111	chr1:22135618	A	G	rs10917151	chr1:22422721	chr1:22096228	A	G	1	0.91394	Leg fat-free mass right	Neale B	UKBB	European	2017	0.01219	0.002162	1.74e-08	+	331285	0	331285	Neale-B_UKBB_EUR_2017
rs12037376	chr1:22462111	chr1:22135618	A	G	rs56318008	chr1:22470407	chr1:22143914	T	C	1	0.91134	Leg fat-free mass right	Neale B	UKBB	European	2017	0.01347	0.002252	2.171e-09	+	331285	0	331285	Neale-B_UKBB_EUR_2017
rs12700667	chr7:25901639	chr7:25862019	A	G	rs12700667	chr7:25901639	chr7:25862019	A	G	0	1	Leg fat-free mass right	Neale B	UKBB	European	2017	-0.008188	0.001826	7.311e-06	-	331285	0	331285	Neale-B_UKBB_EUR_2017
rs12037376	chr1:22462111	chr1:22135618	A	G	rs12037376	chr1:22462111	chr1:22135618	A	G	0	1	Leg predicted mass left	Neale B	UKBB	European	2017	0.011	0.002185	4.788e-07	+	331253	0	331253	Neale-B_UKBB_EUR_2017
rs12037376	chr1:22462111	chr1:22135618	A	G	rs61768001	chr1:22465820	chr1:22139327	C	T	1	0.98377	Leg predicted mass left	Neale B	UKBB	European	2017	0.01075	0.002178	7.967e-07	+	331253	0	331253	Neale-B_UKBB_EUR_2017
rs12037376	chr1:22462111	chr1:22135618	A	G	rs3820282	chr1:22468215	chr1:22141722	T	C	1	0.98377	Leg predicted mass left	Neale B	UKBB	European	2017	0.01074	0.002177	8.059e-07	+	331253	0	331253	Neale-B_UKBB_EUR_2017
rs12037376	chr1:22462111	chr1:22135618	A	G	rs10917151	chr1:22422721	chr1:22096228	A	G	1	0.91394	Leg predicted mass left	Neale B	UKBB	European	2017	0.01128	0.002149	1.518e-07	+	331253	0	331253	Neale-B_UKBB_EUR_2017
rs12037376	chr1:22462111	chr1:22135618	A	G	rs56318008	chr1:22470407	chr1:22143914	T	C	1	0.91134	Leg predicted mass left	Neale B	UKBB	European	2017	0.01217	0.002237	5.357e-08	+	331253	0	331253	Neale-B_UKBB_EUR_2017
rs12700667	chr7:25901639	chr7:25862019	A	G	rs12700667	chr7:25901639	chr7:25862019	A	G	0	1	Leg predicted mass left	Neale B	UKBB	European	2017	-0.008105	0.001814	7.918e-06	-	331253	0	331253	Neale-B_UKBB_EUR_2017
rs12037376	chr1:22462111	chr1:22135618	A	G	rs12037376	chr1:22462111	chr1:22135618	A	G	0	1	Leg predicted mass right	Neale B	UKBB	European	2017	0.01187	0.002184	5.538e-08	+	331285	0	331285	Neale-B_UKBB_EUR_2017
rs12037376	chr1:22462111	chr1:22135618	A	G	rs61768001	chr1:22465820	chr1:22139327	C	T	1	0.98377	Leg predicted mass right	Neale B	UKBB	European	2017	0.0117	0.002178	7.823e-08	+	331285	0	331285	Neale-B_UKBB_EUR_2017
rs12037376	chr1:22462111	chr1:22135618	A	G	rs3820282	chr1:22468215	chr1:22141722	T	C	1	0.98377	Leg predicted mass right	Neale B	UKBB	European	2017	0.01165	0.002177	8.75e-08	+	331285	0	331285	Neale-B_UKBB_EUR_2017
rs12037376	chr1:22462111	chr1:22135618	A	G	rs10917151	chr1:22422721	chr1:22096228	A	G	1	0.91394	Leg predicted mass right	Neale B	UKBB	European	2017	0.01225	0.002148	1.194e-08	+	331285	0	331285	Neale-B_UKBB_EUR_2017
rs12037376	chr1:22462111	chr1:22135618	A	G	rs56318008	chr1:22470407	chr1:22143914	T	C	1	0.91134	Leg predicted mass right	Neale B	UKBB	European	2017	0.01356	0.002237	1.342e-09	+	331285	0	331285	Neale-B_UKBB_EUR_2017
rs12700667	chr7:25901639	chr7:25862019	A	G	rs12700667	chr7:25901639	chr7:25862019	A	G	0	1	Leg predicted mass right	Neale B	UKBB	European	2017	-0.008289	0.001814	4.883e-06	-	331285	0	331285	Neale-B_UKBB_EUR_2017
rs71575922	chr6:152554014	chr6:152232879	C	G	rs71575922	chr6:152554014	chr6:152232879	C	G	0	1	Leiomyoma of uterus	Neale B	UKBB	European	2017	-0.002429	0.0003786	1.392e-10	-	337199	4351	332848	Neale-B_UKBB_EUR_2017
rs71575922	chr6:152554014	chr6:152232879	C	G	rs58415480	chr6:152562271	chr6:152241136	C	G	1	0.91214	Leiomyoma of uterus	Neale B	UKBB	European	2017	-0.002541	0.0003811	2.585e-11	-	337199	4351	332848	Neale-B_UKBB_EUR_2017
rs71575922	chr6:152554014	chr6:152232879	C	G	rs13206305	chr6:152549309	chr6:152228174	C	T	1	0.81447	Leiomyoma of uterus	Neale B	UKBB	European	2017	-0.001855	0.0003481	9.815e-08	-	337199	4351	332848	Neale-B_UKBB_EUR_2017
rs71575922	chr6:152554014	chr6:152232879	C	G	rs12110479	chr6:152554396	chr6:152233261	C	T	1	0.8038	Leiomyoma of uterus	Neale B	UKBB	European	2017	-0.001937	0.000349	2.862e-08	-	337199	4351	332848	Neale-B_UKBB_EUR_2017
rs71575922	chr6:152554014	chr6:152232879	C	G	rs35764603	chr6:152554737	chr6:152233602	G	A	1	0.8038	Leiomyoma of uterus	Neale B	UKBB	European	2017	-0.001934	0.000349	2.981e-08	-	337199	4351	332848	Neale-B_UKBB_EUR_2017
rs74485684	chr11:30242287	chr11:30220740	C	T	rs74485684	chr11:30242287	chr11:30220740	C	T	0	1	Length of menstrual cycle	Neale B	UKBB	European	2017	0.1201	0.009786	1.544e-34	+	30245	0	30245	Neale-B_UKBB_EUR_2017
rs74485684	chr11:30242287	chr11:30220740	C	T	rs75525300	chr11:30307989	chr11:30286442	G	A	1	1	Length of menstrual cycle	Neale B	UKBB	European	2017	0.1194	0.009783	3.654e-34	+	30245	0	30245	Neale-B_UKBB_EUR_2017
rs74485684	chr11:30242287	chr11:30220740	C	T	rs12278989	chr11:30316822	chr11:30295275	G	A	1	1	Length of menstrual cycle	Neale B	UKBB	European	2017	0.1191	0.009782	5.15e-34	+	30245	0	30245	Neale-B_UKBB_EUR_2017
rs74485684	chr11:30242287	chr11:30220740	C	T	rs11031040	chr11:30317733	chr11:30296186	G	T	1	1	Length of menstrual cycle	Neale B	UKBB	European	2017	0.1191	0.009782	5.163e-34	+	30245	0	30245	Neale-B_UKBB_EUR_2017
rs74485684	chr11:30242287	chr11:30220740	C	T	rs12271187	chr11:30319259	chr11:30297712	A	G	1	1	Length of menstrual cycle	Neale B	UKBB	European	2017	0.1191	0.009782	5.168e-34	+	30245	0	30245	Neale-B_UKBB_EUR_2017
rs1537377	chr9:22169700	chr9:22169701	C	T	rs1537377	chr9:22169700	chr9:22169701	C	T	0	1	Monocyte count	Astle W	27863252	European	2016	0.0234	0.00364	1.288e-10	+	173480	0	173480	Astle-W_Blood-Cell-Traits_EUR_2016
rs1537377	chr9:22169700	chr9:22169701	C	T	rs5896970	chr9:22170023	chr9:22170024	G	GC	1	1	Monocyte count	Astle W	27863252	European	2016	0.02338	0.003653	1.563e-10	+	173480	0	173480	Astle-W_Blood-Cell-Traits_EUR_2016
rs1537377	chr9:22169700	chr9:22169701	C	T	rs10811669	chr9:22172893	chr9:22172894	C	T	1	0.97072	Monocyte count	Astle W	27863252	European	2016	0.0235	0.003659	1.337e-10	+	173480	0	173480	Astle-W_Blood-Cell-Traits_EUR_2016
rs1537377	chr9:22169700	chr9:22169701	C	T	rs9987548	chr9:22173075	chr9:22173076	A	T	1	0.97072	Monocyte count	Astle W	27863252	European	2016	0.02343	0.003659	1.504e-10	+	173480	0	173480	Astle-W_Blood-Cell-Traits_EUR_2016
rs1537377	chr9:22169700	chr9:22169701	C	T	rs10122243	chr9:22158924	chr9:22158925	T	C	1	0.95852	Monocyte count	Astle W	27863252	European	2016	0.02292	0.003616	2.331e-10	+	173480	0	173480	Astle-W_Blood-Cell-Traits_EUR_2016
rs1537377	chr9:22169700	chr9:22169701	C	T	rs1537377	chr9:22169700	chr9:22169701	C	T	0	1	Monocyte percentage of white cells	Astle W	27863252	European	2016	0.0191	0.003631	1.444e-07	+	173480	0	173480	Astle-W_Blood-Cell-Traits_EUR_2016
rs1537377	chr9:22169700	chr9:22169701	C	T	rs5896970	chr9:22170023	chr9:22170024	G	GC	1	1	Monocyte percentage of white cells	Astle W	27863252	European	2016	0.01933	0.003643	1.129e-07	+	173480	0	173480	Astle-W_Blood-Cell-Traits_EUR_2016
rs1537377	chr9:22169700	chr9:22169701	C	T	rs10811669	chr9:22172893	chr9:22172894	C	T	1	0.97072	Monocyte percentage of white cells	Astle W	27863252	European	2016	0.01945	0.003649	9.766e-08	+	173480	0	173480	Astle-W_Blood-Cell-Traits_EUR_2016
rs1537377	chr9:22169700	chr9:22169701	C	T	rs9987548	chr9:22173075	chr9:22173076	A	T	1	0.97072	Monocyte percentage of white cells	Astle W	27863252	European	2016	0.01929	0.003649	1.246e-07	+	173480	0	173480	Astle-W_Blood-Cell-Traits_EUR_2016
rs1537377	chr9:22169700	chr9:22169701	C	T	rs10122243	chr9:22158924	chr9:22158925	T	C	1	0.95852	Monocyte percentage of white cells	Astle W	27863252	European	2016	0.01745	0.003607	1.306e-06	+	173480	0	173480	Astle-W_Blood-Cell-Traits_EUR_2016
rs12037376	chr1:22462111	chr1:22135618	A	G	rs12037376	chr1:22462111	chr1:22135618	A	G	0	1	Number of live births	Neale B	UKBB	European	2017	-0.02654	0.005281	5.04e-07	-	180952	0	180952	Neale-B_UKBB_EUR_2017
rs12037376	chr1:22462111	chr1:22135618	A	G	rs61768001	chr1:22465820	chr1:22139327	C	T	1	0.98377	Number of live births	Neale B	UKBB	European	2017	-0.02652	0.005264	4.709e-07	-	180952	0	180952	Neale-B_UKBB_EUR_2017
rs12037376	chr1:22462111	chr1:22135618	A	G	rs3820282	chr1:22468215	chr1:22141722	T	C	1	0.98377	Number of live births	Neale B	UKBB	European	2017	-0.02681	0.005263	3.503e-07	-	180952	0	180952	Neale-B_UKBB_EUR_2017
rs12037376	chr1:22462111	chr1:22135618	A	G	rs10917151	chr1:22422721	chr1:22096228	A	G	1	0.91394	Number of live births	Neale B	UKBB	European	2017	-0.0263	0.005194	4.131e-07	-	180952	0	180952	Neale-B_UKBB_EUR_2017
rs12037376	chr1:22462111	chr1:22135618	A	G	rs56318008	chr1:22470407	chr1:22143914	T	C	1	0.91134	Number of live births	Neale B	UKBB	European	2017	-0.02724	0.005404	4.66e-07	-	180952	0	180952	Neale-B_UKBB_EUR_2017
rs74485684	chr11:30242287	chr11:30220740	C	T	rs74485684	chr11:30242287	chr11:30220740	C	T	0	1	Part of a multiple birth	Neale B	UKBB	European	2017	-0.002305	0.0004923	2.835e-06	-	332317	7382	324935	Neale-B_UKBB_EUR_2017
rs74485684	chr11:30242287	chr11:30220740	C	T	rs75525300	chr11:30307989	chr11:30286442	G	A	1	1	Part of a multiple birth	Neale B	UKBB	European	2017	-0.002332	0.0004919	2.125e-06	-	332317	7382	324935	Neale-B_UKBB_EUR_2017
rs74485684	chr11:30242287	chr11:30220740	C	T	rs12278989	chr11:30316822	chr11:30295275	G	A	1	1	Part of a multiple birth	Neale B	UKBB	European	2017	-0.002331	0.0004918	2.151e-06	-	332317	7382	324935	Neale-B_UKBB_EUR_2017
rs74485684	chr11:30242287	chr11:30220740	C	T	rs11031040	chr11:30317733	chr11:30296186	G	T	1	1	Part of a multiple birth	Neale B	UKBB	European	2017	-0.002331	0.0004918	2.151e-06	-	332317	7382	324935	Neale-B_UKBB_EUR_2017
rs74485684	chr11:30242287	chr11:30220740	C	T	rs12271187	chr11:30319259	chr11:30297712	A	G	1	1	Part of a multiple birth	Neale B	UKBB	European	2017	-0.002331	0.0004918	2.152e-06	-	332317	7382	324935	Neale-B_UKBB_EUR_2017
rs1537377	chr9:22169700	chr9:22169701	C	T	rs1537377	chr9:22169700	chr9:22169701	C	T	0	1	Platelet count	Astle W	27863252	European	2016	0.02027	0.003713	4.789e-08	+	173480	0	173480	Astle-W_Blood-Cell-Traits_EUR_2016
rs1537377	chr9:22169700	chr9:22169701	C	T	rs5896970	chr9:22170023	chr9:22170024	G	GC	1	1	Platelet count	Astle W	27863252	European	2016	0.02024	0.003727	5.601e-08	+	173480	0	173480	Astle-W_Blood-Cell-Traits_EUR_2016
rs1537377	chr9:22169700	chr9:22169701	C	T	rs10811669	chr9:22172893	chr9:22172894	C	T	1	0.97072	Platelet count	Astle W	27863252	European	2016	0.02005	0.003733	7.851e-08	+	173480	0	173480	Astle-W_Blood-Cell-Traits_EUR_2016
rs1537377	chr9:22169700	chr9:22169701	C	T	rs9987548	chr9:22173075	chr9:22173076	A	T	1	0.97072	Platelet count	Astle W	27863252	European	2016	0.02009	0.003733	7.375e-08	+	173480	0	173480	Astle-W_Blood-Cell-Traits_EUR_2016
rs1537377	chr9:22169700	chr9:22169701	C	T	rs10122243	chr9:22158924	chr9:22158925	T	C	1	0.95852	Platelet count	Astle W	27863252	European	2016	0.0191	0.00369	2.274e-07	+	173480	0	173480	Astle-W_Blood-Cell-Traits_EUR_2016
rs1537377	chr9:22169700	chr9:22169701	C	T	rs1537377	chr9:22169700	chr9:22169701	C	T	0	1	Plateletcrit	Astle W	27863252	European	2016	0.01919	0.003724	2.564e-07	+	173480	0	173480	Astle-W_Blood-Cell-Traits_EUR_2016
rs1537377	chr9:22169700	chr9:22169701	C	T	rs5896970	chr9:22170023	chr9:22170024	G	GC	1	1	Plateletcrit	Astle W	27863252	European	2016	0.01914	0.003737	3.015e-07	+	173480	0	173480	Astle-W_Blood-Cell-Traits_EUR_2016
rs1537377	chr9:22169700	chr9:22169701	C	T	rs10811669	chr9:22172893	chr9:22172894	C	T	1	0.97072	Plateletcrit	Astle W	27863252	European	2016	0.01923	0.003743	2.778e-07	+	173480	0	173480	Astle-W_Blood-Cell-Traits_EUR_2016
rs1537377	chr9:22169700	chr9:22169701	C	T	rs9987548	chr9:22173075	chr9:22173076	A	T	1	0.97072	Plateletcrit	Astle W	27863252	European	2016	0.01918	0.003743	3.01e-07	+	173480	0	173480	Astle-W_Blood-Cell-Traits_EUR_2016
rs1537377	chr9:22169700	chr9:22169701	C	T	rs10122243	chr9:22158924	chr9:22158925	T	C	1	0.95852	Plateletcrit	Astle W	27863252	European	2016	0.0183	0.003701	7.598e-07	+	173480	0	173480	Astle-W_Blood-Cell-Traits_EUR_2016
rs12037376	chr1:22462111	chr1:22135618	A	G	rs12037376	chr1:22462111	chr1:22135618	A	G	0	1	Self-reported endometriosis	Neale B	UKBB	European	2017	0.00151	0.0003021	5.764e-07	+	337159	2782	334377	Neale-B_UKBB_EUR_2017
rs12037376	chr1:22462111	chr1:22135618	A	G	rs61768001	chr1:22465820	chr1:22139327	C	T	1	0.98377	Self-reported endometriosis	Neale B	UKBB	European	2017	0.001523	0.0003012	4.257e-07	+	337159	2782	334377	Neale-B_UKBB_EUR_2017
rs12037376	chr1:22462111	chr1:22135618	A	G	rs3820282	chr1:22468215	chr1:22141722	T	C	1	0.98377	Self-reported endometriosis	Neale B	UKBB	European	2017	0.001524	0.0003011	4.195e-07	+	337159	2782	334377	Neale-B_UKBB_EUR_2017
rs12037376	chr1:22462111	chr1:22135618	A	G	rs10917151	chr1:22422721	chr1:22096228	A	G	1	0.91394	Self-reported endometriosis	Neale B	UKBB	European	2017	0.001378	0.0002971	3.514e-06	+	337159	2782	334377	Neale-B_UKBB_EUR_2017
rs12037376	chr1:22462111	chr1:22135618	A	G	rs56318008	chr1:22470407	chr1:22143914	T	C	1	0.91134	Self-reported endometriosis	Neale B	UKBB	European	2017	0.001513	0.0003093	9.941e-07	+	337159	2782	334377	Neale-B_UKBB_EUR_2017
rs74485684	chr11:30242287	chr11:30220740	C	T	rs74485684	chr11:30242287	chr11:30220740	C	T	0	1	Self-reported endometriosis	Neale B	UKBB	European	2017	-0.001419	0.000299	2.084e-06	-	337159	2782	334377	Neale-B_UKBB_EUR_2017
rs74485684	chr11:30242287	chr11:30220740	C	T	rs75525300	chr11:30307989	chr11:30286442	G	A	1	1	Self-reported endometriosis	Neale B	UKBB	European	2017	-0.001415	0.0002987	2.165e-06	-	337159	2782	334377	Neale-B_UKBB_EUR_2017
rs74485684	chr11:30242287	chr11:30220740	C	T	rs12278989	chr11:30316822	chr11:30295275	G	A	1	1	Self-reported endometriosis	Neale B	UKBB	European	2017	-0.001422	0.0002987	1.911e-06	-	337159	2782	334377	Neale-B_UKBB_EUR_2017
rs74485684	chr11:30242287	chr11:30220740	C	T	rs11031040	chr11:30317733	chr11:30296186	G	T	1	1	Self-reported endometriosis	Neale B	UKBB	European	2017	-0.001422	0.0002987	1.912e-06	-	337159	2782	334377	Neale-B_UKBB_EUR_2017
rs74485684	chr11:30242287	chr11:30220740	C	T	rs12271187	chr11:30319259	chr11:30297712	A	G	1	1	Self-reported endometriosis	Neale B	UKBB	European	2017	-0.001422	0.0002987	1.912e-06	-	337159	2782	334377	Neale-B_UKBB_EUR_2017
rs12037376	chr1:22462111	chr1:22135618	A	G	rs12037376	chr1:22462111	chr1:22135618	A	G	0	1	Self-reported uterine fibroids	Neale B	UKBB	European	2017	0.00253	0.000409	6.128e-10	+	337159	5168	331991	Neale-B_UKBB_EUR_2017
rs12037376	chr1:22462111	chr1:22135618	A	G	rs61768001	chr1:22465820	chr1:22139327	C	T	1	0.98377	Self-reported uterine fibroids	Neale B	UKBB	European	2017	0.002501	0.0004077	8.557e-10	+	337159	5168	331991	Neale-B_UKBB_EUR_2017
rs12037376	chr1:22462111	chr1:22135618	A	G	rs3820282	chr1:22468215	chr1:22141722	T	C	1	0.98377	Self-reported uterine fibroids	Neale B	UKBB	European	2017	0.002528	0.0004076	5.584e-10	+	337159	5168	331991	Neale-B_UKBB_EUR_2017
rs12037376	chr1:22462111	chr1:22135618	A	G	rs10917151	chr1:22422721	chr1:22096228	A	G	1	0.91394	Self-reported uterine fibroids	Neale B	UKBB	European	2017	0.002472	0.0004022	7.914e-10	+	337159	5168	331991	Neale-B_UKBB_EUR_2017
rs12037376	chr1:22462111	chr1:22135618	A	G	rs56318008	chr1:22470407	chr1:22143914	T	C	1	0.91134	Self-reported uterine fibroids	Neale B	UKBB	European	2017	0.002675	0.0004187	1.674e-10	+	337159	5168	331991	Neale-B_UKBB_EUR_2017
rs71575922	chr6:152554014	chr6:152232879	C	G	rs71575922	chr6:152554014	chr6:152232879	C	G	0	1	Self-reported uterine fibroids	Neale B	UKBB	European	2017	-0.002691	0.0004117	6.326e-11	-	337159	5168	331991	Neale-B_UKBB_EUR_2017
rs71575922	chr6:152554014	chr6:152232879	C	G	rs58415480	chr6:152562271	chr6:152241136	C	G	1	0.91214	Self-reported uterine fibroids	Neale B	UKBB	European	2017	-0.002667	0.0004144	1.228e-10	-	337159	5168	331991	Neale-B_UKBB_EUR_2017
rs71575922	chr6:152554014	chr6:152232879	C	G	rs13206305	chr6:152549309	chr6:152228174	C	T	1	0.81447	Self-reported uterine fibroids	Neale B	UKBB	European	2017	-0.002479	0.0003785	5.763e-11	-	337159	5168	331991	Neale-B_UKBB_EUR_2017
rs71575922	chr6:152554014	chr6:152232879	C	G	rs12110479	chr6:152554396	chr6:152233261	C	T	1	0.8038	Self-reported uterine fibroids	Neale B	UKBB	European	2017	-0.002531	0.0003795	2.559e-11	-	337159	5168	331991	Neale-B_UKBB_EUR_2017
rs71575922	chr6:152554014	chr6:152232879	C	G	rs35764603	chr6:152554737	chr6:152233602	G	A	1	0.8038	Self-reported uterine fibroids	Neale B	UKBB	European	2017	-0.002527	0.0003794	2.742e-11	-	337159	5168	331991	Neale-B_UKBB_EUR_2017
rs12037376	chr1:22462111	chr1:22135618	A	G	rs12037376	chr1:22462111	chr1:22135618	A	G	0	1	Self-reported vaginal prolapse or uterine prolapse	Neale B	UKBB	European	2017	-0.001191	0.0002483	1.608e-06	-	337159	1870	335289	Neale-B_UKBB_EUR_2017
rs12037376	chr1:22462111	chr1:22135618	A	G	rs61768001	chr1:22465820	chr1:22139327	C	T	1	0.98377	Self-reported vaginal prolapse or uterine prolapse	Neale B	UKBB	European	2017	-0.001214	0.0002475	9.299e-07	-	337159	1870	335289	Neale-B_UKBB_EUR_2017
rs12037376	chr1:22462111	chr1:22135618	A	G	rs3820282	chr1:22468215	chr1:22141722	T	C	1	0.98377	Self-reported vaginal prolapse or uterine prolapse	Neale B	UKBB	European	2017	-0.001216	0.0002475	8.909e-07	-	337159	1870	335289	Neale-B_UKBB_EUR_2017
rs12037376	chr1:22462111	chr1:22135618	A	G	rs10917151	chr1:22422721	chr1:22096228	A	G	1	0.91394	Self-reported vaginal prolapse or uterine prolapse	Neale B	UKBB	European	2017	-0.001101	0.0002442	6.551e-06	-	337159	1870	335289	Neale-B_UKBB_EUR_2017
rs12037376	chr1:22462111	chr1:22135618	A	G	rs56318008	chr1:22470407	chr1:22143914	T	C	1	0.91134	Self-reported vaginal prolapse or uterine prolapse	Neale B	UKBB	European	2017	-0.001183	0.0002542	3.276e-06	-	337159	1870	335289	Neale-B_UKBB_EUR_2017
rs12037376	chr1:22462111	chr1:22135618	A	G	rs12037376	chr1:22462111	chr1:22135618	A	G	0	1	Sitting height	Neale B	UKBB	European	2017	0.02874	0.002582	8.871e-29	+	336172	0	336172	Neale-B_UKBB_EUR_2017
rs12037376	chr1:22462111	chr1:22135618	A	G	rs61768001	chr1:22465820	chr1:22139327	C	T	1	0.98377	Sitting height	Neale B	UKBB	European	2017	0.02852	0.002573	1.513e-28	+	336172	0	336172	Neale-B_UKBB_EUR_2017
rs12037376	chr1:22462111	chr1:22135618	A	G	rs3820282	chr1:22468215	chr1:22141722	T	C	1	0.98377	Sitting height	Neale B	UKBB	European	2017	0.02855	0.002573	1.341e-28	+	336172	0	336172	Neale-B_UKBB_EUR_2017
rs12037376	chr1:22462111	chr1:22135618	A	G	rs10917151	chr1:22422721	chr1:22096228	A	G	1	0.91394	Sitting height	Neale B	UKBB	European	2017	0.02756	0.002539	1.916e-27	+	336172	0	336172	Neale-B_UKBB_EUR_2017
rs12037376	chr1:22462111	chr1:22135618	A	G	rs56318008	chr1:22470407	chr1:22143914	T	C	1	0.91134	Sitting height	Neale B	UKBB	European	2017	0.03172	0.002643	3.475e-33	+	336172	0	336172	Neale-B_UKBB_EUR_2017
rs12037376	chr1:22462111	chr1:22135618	A	G	rs56318008	chr1:22470407	chr1:22143914	T	C	1	0.91134	Total body bone mineral density	Medina-Gomez C	29304378	European	2018	0.0838	0.008042	2e-25	+	-	-	-	NHGRI-EBI_GWAS_Catalog
rs12700667	chr7:25901639	chr7:25862019	A	G	rs12700667	chr7:25901639	chr7:25862019	A	G	0	1	Trunk fat-free mass	Neale B	UKBB	European	2017	-0.01168	0.001747	2.315e-11	-	331030	0	331030	Neale-B_UKBB_EUR_2017
rs12700667	chr7:25901639	chr7:25862019	A	G	rs4722531	chr7:25888015	chr7:25848395	T	C	1	0.90766	Trunk fat-free mass	Neale B	UKBB	European	2017	-0.01122	0.001769	2.254e-10	-	331030	0	331030	Neale-B_UKBB_EUR_2017
rs12700667	chr7:25901639	chr7:25862019	A	G	rs6461887	chr7:25885411	chr7:25845791	C	T	1	0.90758	Trunk fat-free mass	Neale B	UKBB	European	2017	-0.01124	0.001769	2.12e-10	-	331030	0	331030	Neale-B_UKBB_EUR_2017
rs12700667	chr7:25901639	chr7:25862019	A	G	rs979165	chr7:25886478	chr7:25846858	T	G	1	0.90758	Trunk fat-free mass	Neale B	UKBB	European	2017	-0.01134	0.001768	1.453e-10	-	331030	0	331030	Neale-B_UKBB_EUR_2017
rs12700667	chr7:25901639	chr7:25862019	A	G	rs1451385	chr7:25894721	chr7:25855101	C	T	1	0.89802	Trunk fat-free mass	Neale B	UKBB	European	2017	-0.01132	0.001769	1.58e-10	-	331030	0	331030	Neale-B_UKBB_EUR_2017
rs760794	chr6:19790560	chr6:19790329	T	C	rs760794	chr6:19790560	chr6:19790329	T	C	0	1	Trunk fat-free mass	Neale B	UKBB	European	2017	-0.007303	0.001547	2.354e-06	-	331030	0	331030	Neale-B_UKBB_EUR_2017
rs760794	chr6:19790560	chr6:19790329	T	C	rs760796	chr6:19790387	chr6:19790156	T	C	1	1	Trunk fat-free mass	Neale B	UKBB	European	2017	-0.007301	0.001547	2.363e-06	-	331030	0	331030	Neale-B_UKBB_EUR_2017
rs760794	chr6:19790560	chr6:19790329	T	C	rs2223361	chr6:19790809	chr6:19790578	T	C	1	1	Trunk fat-free mass	Neale B	UKBB	European	2017	-0.007325	0.001547	2.19e-06	-	331030	0	331030	Neale-B_UKBB_EUR_2017
rs760794	chr6:19790560	chr6:19790329	T	C	rs6456266	chr6:19791284	chr6:19791053	T	C	1	1	Trunk fat-free mass	Neale B	UKBB	European	2017	-0.007302	0.001547	2.36e-06	-	331030	0	331030	Neale-B_UKBB_EUR_2017
rs12700667	chr7:25901639	chr7:25862019	A	G	rs12700667	chr7:25901639	chr7:25862019	A	G	0	1	Trunk predicted mass	Neale B	UKBB	European	2017	-0.01165	0.001742	2.243e-11	-	330995	0	330995	Neale-B_UKBB_EUR_2017
rs12700667	chr7:25901639	chr7:25862019	A	G	rs4722531	chr7:25888015	chr7:25848395	T	C	1	0.90766	Trunk predicted mass	Neale B	UKBB	European	2017	-0.01119	0.001763	2.167e-10	-	330995	0	330995	Neale-B_UKBB_EUR_2017
rs12700667	chr7:25901639	chr7:25862019	A	G	rs6461887	chr7:25885411	chr7:25845791	C	T	1	0.90758	Trunk predicted mass	Neale B	UKBB	European	2017	-0.01121	0.001764	2.056e-10	-	330995	0	330995	Neale-B_UKBB_EUR_2017
rs12700667	chr7:25901639	chr7:25862019	A	G	rs979165	chr7:25886478	chr7:25846858	T	G	1	0.90758	Trunk predicted mass	Neale B	UKBB	European	2017	-0.01131	0.001763	1.413e-10	-	330995	0	330995	Neale-B_UKBB_EUR_2017
rs12700667	chr7:25901639	chr7:25862019	A	G	rs1451385	chr7:25894721	chr7:25855101	C	T	1	0.89802	Trunk predicted mass	Neale B	UKBB	European	2017	-0.0113	0.001763	1.491e-10	-	330995	0	330995	Neale-B_UKBB_EUR_2017
rs760794	chr6:19790560	chr6:19790329	T	C	rs760794	chr6:19790560	chr6:19790329	T	C	0	1	Trunk predicted mass	Neale B	UKBB	European	2017	-0.007218	0.001542	2.852e-06	-	330995	0	330995	Neale-B_UKBB_EUR_2017
rs760794	chr6:19790560	chr6:19790329	T	C	rs760796	chr6:19790387	chr6:19790156	T	C	1	1	Trunk predicted mass	Neale B	UKBB	European	2017	-0.007218	0.001542	2.857e-06	-	330995	0	330995	Neale-B_UKBB_EUR_2017
rs760794	chr6:19790560	chr6:19790329	T	C	rs2223361	chr6:19790809	chr6:19790578	T	C	1	1	Trunk predicted mass	Neale B	UKBB	European	2017	-0.007242	0.001542	2.644e-06	-	330995	0	330995	Neale-B_UKBB_EUR_2017
rs760794	chr6:19790560	chr6:19790329	T	C	rs6456266	chr6:19791284	chr6:19791053	T	C	1	1	Trunk predicted mass	Neale B	UKBB	European	2017	-0.00722	0.001542	2.843e-06	-	330995	0	330995	Neale-B_UKBB_EUR_2017
rs12700667	chr7:25901639	chr7:25862019	A	G	rs12700667	chr7:25901639	chr7:25862019	A	G	0	1	Waist circumference adjusted for BMI	GIANT	25673412	Mixed	2015	-0.023	0.0038	2e-09	-	236430	0	236430	GIANT_WCadjBMI_Mixed_2015
rs12700667	chr7:25901639	chr7:25862019	A	G	rs979165	chr7:25886478	chr7:25846858	T	G	1	0.90758	Waist circumference adjusted for BMI	GIANT	25673412	Mixed	2015	-0.025	0.0037	7.4e-12	-	243310	0	243310	GIANT_WCadjBMI_Mixed_2015
rs12700667	chr7:25901639	chr7:25862019	A	G	rs1451385	chr7:25894721	chr7:25855101	C	T	1	0.89802	Waist circumference adjusted for BMI	GIANT	25673412	Mixed	2015	-0.024	0.0036	3.3e-11	-	245619	0	245619	GIANT_WCadjBMI_Mixed_2015
rs12700667	chr7:25901639	chr7:25862019	A	G	rs12700667	chr7:25901639	chr7:25862019	A	G	0	1	Waist circumference adjusted for physical activity	GIANT	28448500	European	2017	-0.0274	0.0043	1.94e-10	-	163288	0	163288	GIANT_Waist-adjusted-PA_EUR_2017
rs12700667	chr7:25901639	chr7:25862019	A	G	rs12700667	chr7:25901639	chr7:25862019	A	G	0	1	Waist circumference adjusted for physical activity	GIANT	28448500	Mixed	2017	-0.0267	0.004	3.77e-11	-	178736	0	178736	GIANT_Waist-adjusted-PA_Mixed_2017
rs12700667	chr7:25901639	chr7:25862019	A	G	rs979165	chr7:25886478	chr7:25846858	T	G	1	0.90758	Waist circumference adjusted for physical activity	GIANT	28448500	European	2017	-0.0289	0.0043	1.79e-11	-	164735	0	164735	GIANT_Waist-adjusted-PA_EUR_2017
rs12700667	chr7:25901639	chr7:25862019	A	G	rs979165	chr7:25886478	chr7:25846858	T	G	1	0.90758	Waist circumference adjusted for physical activity	GIANT	28448500	Mixed	2017	-0.0267	0.0042	1.74e-10	-	171242	0	171242	GIANT_Waist-adjusted-PA_Mixed_2017
rs12700667	chr7:25901639	chr7:25862019	A	G	rs1451385	chr7:25894721	chr7:25855101	C	T	1	0.89802	Waist circumference adjusted for physical activity	GIANT	28448500	European	2017	-0.0278	0.0043	6.79e-11	-	166816	0	166816	GIANT_Waist-adjusted-PA_EUR_2017
rs12700667	chr7:25901639	chr7:25862019	A	G	rs1451385	chr7:25894721	chr7:25855101	C	T	1	0.89802	Waist circumference adjusted for physical activity	GIANT	28448500	Mixed	2017	-0.0264	0.004	3.13e-11	-	186772	0	186772	GIANT_Waist-adjusted-PA_Mixed_2017
rs12700667	chr7:25901639	chr7:25862019	A	G	rs12700667	chr7:25901639	chr7:25862019	A	G	0	1	Waist circumference adjusted for smoking	GIANT	28443625	European	2017	-0.0237	0.0045	1.238e-07	-	162431	0	162431	GIANT_Waist-adjusted-Smoking_EUR_2017
rs12700667	chr7:25901639	chr7:25862019	A	G	rs12700667	chr7:25901639	chr7:25862019	A	G	0	1	Waist circumference adjusted for smoking	GIANT	28443625	Mixed	2017	-0.0219	0.0042	1.495e-07	-	179745	0	179745	GIANT_Waist-adjusted-Smoking_Mixed_2017
rs12700667	chr7:25901639	chr7:25862019	A	G	rs979165	chr7:25886478	chr7:25846858	T	G	1	0.90758	Waist circumference adjusted for smoking	GIANT	28443625	European	2017	-0.0266	0.0043	4.198e-10	-	180677	0	180677	GIANT_Waist-adjusted-Smoking_EUR_2017
rs12700667	chr7:25901639	chr7:25862019	A	G	rs979165	chr7:25886478	chr7:25846858	T	G	1	0.90758	Waist circumference adjusted for smoking	GIANT	28443625	Mixed	2017	-0.0245	0.0041	3.547e-09	-	188956	0	188956	GIANT_Waist-adjusted-Smoking_Mixed_2017
rs12700667	chr7:25901639	chr7:25862019	A	G	rs1451385	chr7:25894721	chr7:25855101	C	T	1	0.89802	Waist circumference adjusted for smoking	GIANT	28443625	European	2017	-0.0261	0.0042	5.759e-10	-	182899	0	182899	GIANT_Waist-adjusted-Smoking_EUR_2017
rs12700667	chr7:25901639	chr7:25862019	A	G	rs1451385	chr7:25894721	chr7:25855101	C	T	1	0.89802	Waist circumference adjusted for smoking	GIANT	28443625	Mixed	2017	-0.0236	0.0039	9.674e-10	-	204984	0	204984	GIANT_Waist-adjusted-Smoking_Mixed_2017
rs12700667	chr7:25901639	chr7:25862019	A	G	rs12700667	chr7:25901639	chr7:25862019	A	G	0	1	Waist circumference adjusted for smoking in females	GIANT	28443625	Mixed	2017	-0.0288	0.0059	9.519e-07	-	82077	0	82077	GIANT_WHR-adjusted-Smoking-F_Mixed_2017
rs12700667	chr7:25901639	chr7:25862019	A	G	rs12700667	chr7:25901639	chr7:25862019	A	G	0	1	Waist circumference adjusted for smoking in females	GIANT	28443625	Mixed	2017	-0.0313	0.0057	3.38e-08	-	91510	0	91510	GIANT_Waist-adjusted-Smoking-F_Mixed_2017
rs12700667	chr7:25901639	chr7:25862019	A	G	rs979165	chr7:25886478	chr7:25846858	T	G	1	0.90758	Waist circumference adjusted for smoking in females	GIANT	28443625	Mixed	2017	-0.0329	0.0054	1.031e-09	-	98592	0	98592	GIANT_WHR-adjusted-Smoking-F_Mixed_2017
rs12700667	chr7:25901639	chr7:25862019	A	G	rs979165	chr7:25886478	chr7:25846858	T	G	1	0.90758	Waist circumference adjusted for smoking in females	GIANT	28443625	Mixed	2017	-0.0333	0.0051	8.617e-11	-	109208	0	109208	GIANT_Waist-adjusted-Smoking-F_Mixed_2017
rs12700667	chr7:25901639	chr7:25862019	A	G	rs1451385	chr7:25894721	chr7:25855101	C	T	1	0.89802	Waist circumference adjusted for smoking in females	GIANT	28443625	Mixed	2017	-0.0316	0.0051	6.989e-10	-	106628	0	106628	GIANT_WHR-adjusted-Smoking-F_Mixed_2017
rs12700667	chr7:25901639	chr7:25862019	A	G	rs1451385	chr7:25894721	chr7:25855101	C	T	1	0.89802	Waist circumference adjusted for smoking in females	GIANT	28443625	Mixed	2017	-0.0323	0.005	1.11e-10	-	116115	0	116115	GIANT_Waist-adjusted-Smoking-F_Mixed_2017
rs12700667	chr7:25901639	chr7:25862019	A	G	rs12700667	chr7:25901639	chr7:25862019	A	G	0	1	Waist circumference in female non-smokers	GIANT	28443625	Mixed	2017	-0.0319	0.0064	5.1e-07	-	74510	0	74510	GIANT_Waist-Non-smokers-F_Mixed_2017
rs12700667	chr7:25901639	chr7:25862019	A	G	rs979165	chr7:25886478	chr7:25846858	T	G	1	0.90758	Waist circumference in female non-smokers	GIANT	28443625	Mixed	2017	-0.0361	0.0058	3.583e-10	-	90752	0	90752	GIANT_Waist-Non-smokers-F_Mixed_2017
rs12700667	chr7:25901639	chr7:25862019	A	G	rs1451385	chr7:25894721	chr7:25855101	C	T	1	0.89802	Waist circumference in female non-smokers	GIANT	28443625	Mixed	2017	-0.0347	0.0055	3.116e-10	-	96418	0	96418	GIANT_Waist-Non-smokers-F_Mixed_2017
rs12700667	chr7:25901639	chr7:25862019	A	G	rs12700667	chr7:25901639	chr7:25862019	A	G	0	1	Waist circumference in non-smokers	GIANT	28443625	European	2017	-0.0277	0.005	3.964e-08	-	127023	0	127023	GIANT_Waist-Non-smokers_EUR_2017
rs12700667	chr7:25901639	chr7:25862019	A	G	rs12700667	chr7:25901639	chr7:25862019	A	G	0	1	Waist circumference in non-smokers	GIANT	28443625	Mixed	2017	-0.0246	0.0046	9.153e-08	-	142231	0	142231	GIANT_Waist-Non-smokers_Mixed_2017
rs12700667	chr7:25901639	chr7:25862019	A	G	rs979165	chr7:25886478	chr7:25846858	T	G	1	0.90758	Waist circumference in non-smokers	GIANT	28443625	European	2017	-0.0321	0.0048	1.468e-11	-	143850	0	143850	GIANT_Waist-Non-smokers_EUR_2017
rs12700667	chr7:25901639	chr7:25862019	A	G	rs979165	chr7:25886478	chr7:25846858	T	G	1	0.90758	Waist circumference in non-smokers	GIANT	28443625	Mixed	2017	-0.0294	0.0046	1.861e-10	-	151088	0	151088	GIANT_Waist-Non-smokers_Mixed_2017
rs12700667	chr7:25901639	chr7:25862019	A	G	rs1451385	chr7:25894721	chr7:25855101	C	T	1	0.89802	Waist circumference in non-smokers	GIANT	28443625	European	2017	-0.0314	0.0047	2.779e-11	-	145047	0	145047	GIANT_Waist-Non-smokers_EUR_2017
rs12700667	chr7:25901639	chr7:25862019	A	G	rs1451385	chr7:25894721	chr7:25855101	C	T	1	0.89802	Waist circumference in non-smokers	GIANT	28443625	Mixed	2017	-0.0277	0.0043	1.105e-10	-	164438	0	164438	GIANT_Waist-Non-smokers_Mixed_2017
rs12700667	chr7:25901639	chr7:25862019	A	G	rs12700667	chr7:25901639	chr7:25862019	A	G	0	1	Waist circumference in physically active indivdiuals	GIANT	28448500	European	2017	-0.0266	0.0049	5.67e-08	-	126668	0	126668	GIANT_Waist-Active_EUR_2017
rs12700667	chr7:25901639	chr7:25862019	A	G	rs12700667	chr7:25901639	chr7:25862019	A	G	0	1	Waist circumference in physically active indivdiuals	GIANT	28448500	Mixed	2017	-0.0264	0.0047	1.81e-08	-	135135	0	135135	GIANT_Waist-Active_Mixed_2017
rs12700667	chr7:25901639	chr7:25862019	A	G	rs979165	chr7:25886478	chr7:25846858	T	G	1	0.90758	Waist circumference in physically active indivdiuals	GIANT	28448500	European	2017	-0.0285	0.0049	5.83e-09	-	126417	0	126417	GIANT_Waist-Active_EUR_2017
rs12700667	chr7:25901639	chr7:25862019	A	G	rs1451385	chr7:25894721	chr7:25855101	C	T	1	0.89802	Waist circumference in physically active indivdiuals	GIANT	28448500	European	2017	-0.0274	0.0049	2.06e-08	-	127666	0	127666	GIANT_Waist-Active_EUR_2017
rs12700667	chr7:25901639	chr7:25862019	A	G	rs1451385	chr7:25894721	chr7:25855101	C	T	1	0.89802	Waist circumference in physically active indivdiuals	GIANT	28448500	Mixed	2017	-0.0259	0.0046	1.74e-08	-	139597	0	139597	GIANT_Waist-Active_Mixed_2017
rs12700667	chr7:25901639	chr7:25862019	A	G	rs12700667	chr7:25901639	chr7:25862019	A	G	0	1	Waist hip ratio	GIANT	25673412	European	2015	-0.019	0.0039	1.3e-06	-	207915	0	207915	GIANT_WHR_EUR_2015
rs12700667	chr7:25901639	chr7:25862019	A	G	rs12700667	chr7:25901639	chr7:25862019	A	G	0	1	Waist hip ratio	GIANT	25673412	Mixed	2015	-0.017	0.0037	6.6e-06	-	218687	0	218687	GIANT_WHR_Mixed_2015
rs12700667	chr7:25901639	chr7:25862019	A	G	rs979165	chr7:25886478	chr7:25846858	T	G	1	0.90758	Waist hip ratio	Heid IM	20935629	European	2010	NA	NA	4.57e-06	NA	77167	0	77167	GIANT_WHR_EUR_2010
rs12700667	chr7:25901639	chr7:25862019	A	G	rs979165	chr7:25886478	chr7:25846858	T	G	1	0.90758	Waist hip ratio	GIANT	25673412	European	2015	-0.022	0.0038	9.1e-09	-	209884	0	209884	GIANT_WHR_EUR_2015
rs12700667	chr7:25901639	chr7:25862019	A	G	rs979165	chr7:25886478	chr7:25846858	T	G	1	0.90758	Waist hip ratio	GIANT	25673412	Mixed	2015	-0.019	0.0037	1.6e-07	-	224273	0	224273	GIANT_WHR_Mixed_2015
rs12700667	chr7:25901639	chr7:25862019	A	G	rs979165	chr7:25886478	chr7:25846858	T	G	1	0.90758	Waist hip ratio	Heid IM	20935629	European	2010	NA	NA	4.57e-06	NA	77167	-	-	GRASP
rs12700667	chr7:25901639	chr7:25862019	A	G	rs1451385	chr7:25894721	chr7:25855101	C	T	1	0.89802	Waist hip ratio	Heid IM	20935629	European	2010	NA	NA	4.13e-06	NA	77167	0	77167	GIANT_WHR_EUR_2010
rs12700667	chr7:25901639	chr7:25862019	A	G	rs1451385	chr7:25894721	chr7:25855101	C	T	1	0.89802	Waist hip ratio	GIANT	25673412	European	2015	-0.022	0.0038	9.5e-09	-	212155	0	212155	GIANT_WHR_EUR_2015
rs12700667	chr7:25901639	chr7:25862019	A	G	rs1451385	chr7:25894721	chr7:25855101	C	T	1	0.89802	Waist hip ratio	GIANT	25673412	Mixed	2015	-0.02	0.0037	8.6e-08	-	226547	0	226547	GIANT_WHR_Mixed_2015
rs12700667	chr7:25901639	chr7:25862019	A	G	rs1451385	chr7:25894721	chr7:25855101	C	T	1	0.89802	Waist hip ratio	Heid IM	20935629	European	2010	NA	NA	5.93e-08	NA	77167	-	-	GRASP
rs12037376	chr1:22462111	chr1:22135618	A	G	rs3820282	chr1:22468215	chr1:22141722	T	C	1	0.98377	Waist hip ratio adjusted for BMI	GIANT	25673412	Mixed	2015	-0.028	0.0059	1.8e-06	-	142118	0	142118	GIANT_WHRadjBMI_Mixed_2015
rs12700667	chr7:25901639	chr7:25862019	A	G	rs12700667	chr7:25901639	chr7:25862019	A	G	0	1	Waist hip ratio adjusted for BMI	GIANT	25673412	Mixed	2015	-0.023	0.0038	1.2e-09	-	216293	0	216293	GIANT_WHRadjBMI_Mixed_2015
rs12700667	chr7:25901639	chr7:25862019	A	G	rs979165	chr7:25886478	chr7:25846858	T	G	1	0.90758	Waist hip ratio adjusted for BMI	GIANT	25673412	Mixed	2015	-0.026	0.0038	4.2e-12	-	222055	0	222055	GIANT_WHRadjBMI_Mixed_2015
rs12700667	chr7:25901639	chr7:25862019	A	G	rs1451385	chr7:25894721	chr7:25855101	C	T	1	0.89802	Waist hip ratio adjusted for BMI	GIANT	25673412	Mixed	2015	-0.026	0.0038	3e-12	-	224328	0	224328	GIANT_WHRadjBMI_Mixed_2015
rs12700667	chr7:25901639	chr7:25862019	A	G	rs979165	chr7:25886478	chr7:25846858	T	G	1	0.90758	Waist hip ratio adjusted for BMI in females greater than 50 years of age	GIANT	26426971	European	2015	-0.031	0.0066	2.1e-06	-	70827	0	70827	GIANT_WHRadjBMI-F-GT-50_EUR_2015
rs12700667	chr7:25901639	chr7:25862019	A	G	rs1451385	chr7:25894721	chr7:25855101	C	T	1	0.89802	Waist hip ratio adjusted for BMI in females greater than 50 years of age	GIANT	26426971	European	2015	-0.032	0.0066	1.3e-06	-	71912	0	71912	GIANT_WHRadjBMI-F-GT-50_EUR_2015
rs12700667	chr7:25901639	chr7:25862019	A	G	rs12700667	chr7:25901639	chr7:25862019	A	G	0	1	Waist hip ratio adjusted for BMI in females less than or equal to 50 years of age	GIANT	26426971	European	2015	-0.044	0.0083	1.2e-07	-	43301	0	43301	GIANT_WHRadjBMI-F-LE-50_EUR_2015
rs12700667	chr7:25901639	chr7:25862019	A	G	rs979165	chr7:25886478	chr7:25846858	T	G	1	0.90758	Waist hip ratio adjusted for BMI in females less than or equal to 50 years of age	GIANT	26426971	European	2015	-0.048	0.0083	9e-09	-	42968	0	42968	GIANT_WHRadjBMI-F-LE-50_EUR_2015
rs12700667	chr7:25901639	chr7:25862019	A	G	rs1451385	chr7:25894721	chr7:25855101	C	T	1	0.89802	Waist hip ratio adjusted for BMI in females less than or equal to 50 years of age	GIANT	26426971	European	2015	-0.047	0.0081	7.8e-09	-	44410	0	44410	GIANT_WHRadjBMI-F-LE-50_EUR_2015
rs12700667	chr7:25901639	chr7:25862019	A	G	rs12700667	chr7:25901639	chr7:25862019	A	G	0	1	Waist hip ratio adjusted for physical activity	GIANT	28448500	European	2017	-0.0285	0.0046	4e-10	-	145968	0	145968	GIANT_WHR-adjusted-PA_EUR_2017
rs12700667	chr7:25901639	chr7:25862019	A	G	rs12700667	chr7:25901639	chr7:25862019	A	G	0	1	Waist hip ratio adjusted for physical activity	GIANT	28448500	Mixed	2017	-0.0263	0.0043	1.2e-09	-	160052	0	160052	GIANT_WHR-adjusted-PA_Mixed_2017
rs12700667	chr7:25901639	chr7:25862019	A	G	rs979165	chr7:25886478	chr7:25846858	T	G	1	0.90758	Waist hip ratio adjusted for physical activity	GIANT	28448500	European	2017	-0.0307	0.0046	2.11e-11	-	147421	0	147421	GIANT_WHR-adjusted-PA_EUR_2017
rs12700667	chr7:25901639	chr7:25862019	A	G	rs1451385	chr7:25894721	chr7:25855101	C	T	1	0.89802	Waist hip ratio adjusted for physical activity	GIANT	28448500	European	2017	-0.0295	0.0045	7.14e-11	-	149495	0	149495	GIANT_WHR-adjusted-PA_EUR_2017
rs12700667	chr7:25901639	chr7:25862019	A	G	rs1451385	chr7:25894721	chr7:25855101	C	T	1	0.89802	Waist hip ratio adjusted for physical activity	GIANT	28448500	Mixed	2017	-0.0268	0.0042	1.2e-10	-	168062	0	168062	GIANT_WHR-adjusted-PA_Mixed_2017
rs12700667	chr7:25901639	chr7:25862019	A	G	rs12700667	chr7:25901639	chr7:25862019	A	G	0	1	Waist hip ratio adjusted for physical activity in females	GIANT	28448500	Mixed	2017	-0.0313	0.0056	1.79e-08	-	90160	0	90160	GIANT_WHR-adjusted-PA-F_Mixed_2017
rs12700667	chr7:25901639	chr7:25862019	A	G	rs1451385	chr7:25894721	chr7:25855101	C	T	1	0.89802	Waist hip ratio adjusted for physical activity in females	GIANT	28448500	Mixed	2017	-0.0315	0.0054	5.4e-09	-	95765	0	95765	GIANT_WHR-adjusted-PA-F_Mixed_2017
rs12700667	chr7:25901639	chr7:25862019	A	G	rs979165	chr7:25886478	chr7:25846858	T	G	1	0.90758	Waist hip ratio in females	GIANT	25673412	Mixed	2015	-0.026	0.005	2.3e-07	-	122324	0	122324	GIANT_WHR-F_Mixed_2015
rs12700667	chr7:25901639	chr7:25862019	A	G	rs1451385	chr7:25894721	chr7:25855101	C	T	1	0.89802	Waist hip ratio in females	GIANT	25673412	Mixed	2015	-0.026	0.0049	2.1e-07	-	124562	0	124562	GIANT_WHR-F_Mixed_2015
rs12037376	chr1:22462111	chr1:22135618	A	G	rs3820282	chr1:22468215	chr1:22141722	T	C	1	0.98377	Waist hip ratio in non-smokers	GIANT	28443625	European	2017	-0.0332	0.007	1.867e-06	-	99899	0	99899	GIANT_WHR-Non-smokers_EUR_2017
rs12700667	chr7:25901639	chr7:25862019	A	G	rs12700667	chr7:25901639	chr7:25862019	A	G	0	1	Waist hip ratio in physically active females	GIANT	28448500	Mixed	2017	-0.0357	0.0064	1.94e-08	-	69064	0	69064	GIANT_WHR-Active-F_Mixed_2017
rs12700667	chr7:25901639	chr7:25862019	A	G	rs1451385	chr7:25894721	chr7:25855101	C	T	1	0.89802	Waist hip ratio in physically active females	GIANT	28448500	Mixed	2017	-0.0375	0.0062	1.16e-09	-	72668	0	72668	GIANT_WHR-Active-F_Mixed_2017
rs12700667	chr7:25901639	chr7:25862019	A	G	rs12700667	chr7:25901639	chr7:25862019	A	G	0	1	Waist hip ratio in physically active indivdiuals	GIANT	28448500	European	2017	-0.0319	0.0052	7.15e-10	-	113266	0	113266	GIANT_WHR-Active_EUR_2017
rs12700667	chr7:25901639	chr7:25862019	A	G	rs12700667	chr7:25901639	chr7:25862019	A	G	0	1	Waist hip ratio in physically active indivdiuals	GIANT	28448500	Mixed	2017	-0.0307	0.005	6.96e-10	-	120657	0	120657	GIANT_WHR-Active_Mixed_2017
rs12700667	chr7:25901639	chr7:25862019	A	G	rs979165	chr7:25886478	chr7:25846858	T	G	1	0.90758	Waist hip ratio in physically active indivdiuals	GIANT	28448500	European	2017	-0.0341	0.0052	5.4e-11	-	113021	0	113021	GIANT_WHR-Active_EUR_2017
rs12700667	chr7:25901639	chr7:25862019	A	G	rs1451385	chr7:25894721	chr7:25855101	C	T	1	0.89802	Waist hip ratio in physically active indivdiuals	GIANT	28448500	European	2017	-0.0336	0.0051	6.86e-11	-	114263	0	114263	GIANT_WHR-Active_EUR_2017
rs12700667	chr7:25901639	chr7:25862019	A	G	rs1451385	chr7:25894721	chr7:25855101	C	T	1	0.89802	Waist hip ratio in physically active indivdiuals	GIANT	28448500	Mixed	2017	-0.0313	0.0048	7.38e-11	-	125100	0	125100	GIANT_WHR-Active_Mixed_2017
rs12700667	chr7:25901639	chr7:25862019	A	G	rs12700667	chr7:25901639	chr7:25862019	A	G	0	1	Whole body fat-free mass	Neale B	UKBB	European	2017	-0.01018	0.001754	6.468e-09	-	331291	0	331291	Neale-B_UKBB_EUR_2017
rs12700667	chr7:25901639	chr7:25862019	A	G	rs4722531	chr7:25888015	chr7:25848395	T	C	1	0.90766	Whole body fat-free mass	Neale B	UKBB	European	2017	-0.009735	0.001776	4.197e-08	-	331291	0	331291	Neale-B_UKBB_EUR_2017
rs12700667	chr7:25901639	chr7:25862019	A	G	rs6461887	chr7:25885411	chr7:25845791	C	T	1	0.90758	Whole body fat-free mass	Neale B	UKBB	European	2017	-0.00977	0.001776	3.793e-08	-	331291	0	331291	Neale-B_UKBB_EUR_2017
rs12700667	chr7:25901639	chr7:25862019	A	G	rs979165	chr7:25886478	chr7:25846858	T	G	1	0.90758	Whole body fat-free mass	Neale B	UKBB	European	2017	-0.009841	0.001775	2.972e-08	-	331291	0	331291	Neale-B_UKBB_EUR_2017
rs12700667	chr7:25901639	chr7:25862019	A	G	rs1451385	chr7:25894721	chr7:25855101	C	T	1	0.89802	Whole body fat-free mass	Neale B	UKBB	European	2017	-0.009823	0.001776	3.187e-08	-	331291	0	331291	Neale-B_UKBB_EUR_2017
rs760794	chr6:19790560	chr6:19790329	T	C	rs760794	chr6:19790560	chr6:19790329	T	C	0	1	Whole body fat-free mass	Neale B	UKBB	European	2017	-0.00687	0.001553	9.73e-06	-	331291	0	331291	Neale-B_UKBB_EUR_2017
rs760794	chr6:19790560	chr6:19790329	T	C	rs760796	chr6:19790387	chr6:19790156	T	C	1	1	Whole body fat-free mass	Neale B	UKBB	European	2017	-0.006863	0.001553	9.92e-06	-	331291	0	331291	Neale-B_UKBB_EUR_2017
rs760794	chr6:19790560	chr6:19790329	T	C	rs2223361	chr6:19790809	chr6:19790578	T	C	1	1	Whole body fat-free mass	Neale B	UKBB	European	2017	-0.00689	0.001553	9.158e-06	-	331291	0	331291	Neale-B_UKBB_EUR_2017
rs760794	chr6:19790560	chr6:19790329	T	C	rs6456266	chr6:19791284	chr6:19791053	T	C	1	1	Whole body fat-free mass	Neale B	UKBB	European	2017	-0.006866	0.001553	9.826e-06	-	331291	0	331291	Neale-B_UKBB_EUR_2017
rs12037376	chr1:22462111	chr1:22135618	A	G	rs56318008	chr1:22470407	chr1:22143914	T	C	1	0.91134	Whole body water mass	Neale B	UKBB	European	2017	0.009796	0.002166	6.128e-06	+	331315	0	331315	Neale-B_UKBB_EUR_2017
rs12700667	chr7:25901639	chr7:25862019	A	G	rs12700667	chr7:25901639	chr7:25862019	A	G	0	1	Whole body water mass	Neale B	UKBB	European	2017	-0.01002	0.001757	1.161e-08	-	331315	0	331315	Neale-B_UKBB_EUR_2017
rs12700667	chr7:25901639	chr7:25862019	A	G	rs4722531	chr7:25888015	chr7:25848395	T	C	1	0.90766	Whole body water mass	Neale B	UKBB	European	2017	-0.009628	0.001778	6.166e-08	-	331315	0	331315	Neale-B_UKBB_EUR_2017
rs12700667	chr7:25901639	chr7:25862019	A	G	rs6461887	chr7:25885411	chr7:25845791	C	T	1	0.90758	Whole body water mass	Neale B	UKBB	European	2017	-0.00966	0.001779	5.627e-08	-	331315	0	331315	Neale-B_UKBB_EUR_2017
rs12700667	chr7:25901639	chr7:25862019	A	G	rs979165	chr7:25886478	chr7:25846858	T	G	1	0.90758	Whole body water mass	Neale B	UKBB	European	2017	-0.009734	0.001778	4.389e-08	-	331315	0	331315	Neale-B_UKBB_EUR_2017
rs12700667	chr7:25901639	chr7:25862019	A	G	rs1451385	chr7:25894721	chr7:25855101	C	T	1	0.89802	Whole body water mass	Neale B	UKBB	European	2017	-0.009709	0.001779	4.792e-08	-	331315	0	331315	Neale-B_UKBB_EUR_2017
rs760794	chr6:19790560	chr6:19790329	T	C	rs760794	chr6:19790560	chr6:19790329	T	C	0	1	Whole body water mass	Neale B	UKBB	European	2017	-0.006916	0.001555	8.734e-06	-	331315	0	331315	Neale-B_UKBB_EUR_2017
rs760794	chr6:19790560	chr6:19790329	T	C	rs760796	chr6:19790387	chr6:19790156	T	C	1	1	Whole body water mass	Neale B	UKBB	European	2017	-0.006907	0.001555	8.956e-06	-	331315	0	331315	Neale-B_UKBB_EUR_2017
rs760794	chr6:19790560	chr6:19790329	T	C	rs2223361	chr6:19790809	chr6:19790578	T	C	1	1	Whole body water mass	Neale B	UKBB	European	2017	-0.006936	0.001555	8.22e-06	-	331315	0	331315	Neale-B_UKBB_EUR_2017
rs760794	chr6:19790560	chr6:19790329	T	C	rs6456266	chr6:19791284	chr6:19791053	T	C	1	1	Whole body water mass	Neale B	UKBB	European	2017	-0.006914	0.001555	8.796e-06	-	331315	0	331315	Neale-B_UKBB_EUR_2017
rs74485684	chr11:30242287	chr11:30220740	C	T	rs74485684	chr11:30242287	chr11:30220740	C	T	0	1	Years since last cervical smear test	Neale B	UKBB	European	2017	-0.02099	0.003965	1.202e-07	-	139363	0	139363	Neale-B_UKBB_EUR_2017
rs74485684	chr11:30242287	chr11:30220740	C	T	rs75525300	chr11:30307989	chr11:30286442	G	A	1	1	Years since last cervical smear test	Neale B	UKBB	European	2017	-0.02103	0.003962	1.107e-07	-	139363	0	139363	Neale-B_UKBB_EUR_2017
rs74485684	chr11:30242287	chr11:30220740	C	T	rs12278989	chr11:30316822	chr11:30295275	G	A	1	1	Years since last cervical smear test	Neale B	UKBB	European	2017	-0.02089	0.003961	1.348e-07	-	139363	0	139363	Neale-B_UKBB_EUR_2017
rs74485684	chr11:30242287	chr11:30220740	C	T	rs11031040	chr11:30317733	chr11:30296186	G	T	1	1	Years since last cervical smear test	Neale B	UKBB	European	2017	-0.02089	0.003961	1.348e-07	-	139363	0	139363	Neale-B_UKBB_EUR_2017
rs74485684	chr11:30242287	chr11:30220740	C	T	rs12271187	chr11:30319259	chr11:30297712	A	G	1	1	Years since last cervical smear test	Neale B	UKBB	European	2017	-0.02089	0.003961	1.348e-07	-	139363	0	139363	Neale-B_UKBB_EUR_2017

## Sheet: Supplementary_Table2
Supplementary Table 2: Meta-analysis of the IEC Endometriosis GWAS data and the 2016 IHGC migraine GWAS data
S/N	SNP	CHR	BP	Gene	EA	NEA	FE Meta-analysis		RE2 Meta-analysis		Endometriosis IEC		Migraine IHGC		LD with rs74485684
							OR	P-value	OR	P-value	OR	P-value	OR	P-value	R2
1	rs10835649	11	30329175	ARL14EP	A	G	1.06	8.31e-08	1.07	2.03e-08	1.11	4.7e-08	1.04	0.00681	1
2	rs11031005	11	30226356	FSHB	T	C	1.07	3.27e-08	1.08	1.28e-08	1.12	6.24e-08	1.04	0.00381	0.821
3	rs11031006	11	30226528	ARL14EP	G	A	0.94	4.48e-08	0.93	1.93e-08	0.9	8.57e-08	1.04	0.00424	0.828
4	rs11031040	11	30317733	ARL14EP	T	G	1.06	7.87e-08	1.07	2.3e-08	1.11	5.8e-08	1.04	0.0069	1
5	rs11031047	11	30337523	ARL14EP	C	T	0.94	9.26e-08	0.93	2.83e-08	0.9	7.44e-08	1.04	0.00715	1
6	rs12223987	11	30395871	RP4-710M3.1; ARL14EP	C	T	0.94	4.51e-08	0.93	4.55e-08	0.91	1.31e-06	1.05	0.00139	0.694
7	rs12271187	11	30319259	ARL14EP	G	A	0.94	6.31e-08	0.93	1.89e-08	0.9	4.95e-08	1.04	0.00648	1
8	rs12271300	11	30319433	ARL14EP	G	A	0.94	6.39e-08	0.93	1.91e-08	0.9	4.95e-08	1.04	0.00654	1
9	rs12278989	11	30316822	ARL14EP	A	G	1.06	7.36e-08	1.07	2.21e-08	1.11	5.97e-08	1.04	0.00653	1
10	rs12363824	11	30342150	ARL14EP	G	A	0.94	4.72e-08	0.93	1.5e-08	0.9	4.33e-08	1.04	0.00567	1
11	rs3858429	11	30343757	ARL14EP	C	T	0.94	8.21e-08	0.93	2.33e-08	0.9	5.63e-08	1.04	0.00719	1
12	rs4071558	11	30344591	ARL14EP	C	T	0.94	8.04e-08	0.93	2.27e-08	0.9	5.47e-08	1.04	0.00717	1
13	rs4071559	11	30344725	ARL14EP	C	T	0.94	5.59e-08	0.93	1.81e-08	0.9	5.16e-08	1.04	0.00595	1
FE: Fixed effect; SNP: Single nucleotide polymorphism; CHR: Chromosome; BP: Base position; EA: Effect allele; NEA: Non-effect allele; RE2: Modified random effect; IEC: International endogene consortium; IHGC: International headache genetic consortium; OR: Odds ratio.
R2: Correlation between endometriosis lead SNP and signals identified in the present study

## Sheet: Supplementary_Table3
Supplementary Table 3: Suggestive genome-wide significant SNPs in the meta-analysis of the IEC Endometriosis GWAS data and the 2016 IHGC migraine GWAS data
SNP	Chr	Position	GenomicLocus	EA	NEA	OR_FE	PVALUE_FE	OR_RE2	PVALUE_RE2	OR_endo	endo_Pvalue	OR_Migr	Migr_Pvalue	Column1
rs79270576	1	5286927	1	C	T	1.17	1.9e-06	1.18	2.12e-06	1.26	2.05e-05	0.89	0.00549
rs7544256	1	115824398	2	A	G	1.05	1.08e-07	1.05	1.28e-07	1.05	0.00144	1.05	2.11e-05
rs112332086	2	67453726	3	T	A	1.09	8.08e-06	1.09	9.85e-06	1.09	0.00466	0.92	0.000551
rs112796779	2	141306630	4	A	G	1.15	5.13e-06	1.15	6.27e-06	1.17	0.00124	1.14	0.00117
rs4346346	2	150670364	5	C	A	0.96	1.01e-06	0.96	1.24e-06	0.96	0.00328	1.04	9.33e-05
rs13409739	2	212580184	6	G	A	1.04	6.28e-06	1.04	7.7e-06	1.03	0.0312	0.96	5.3e-05
rs162212	3	7839477	7	A	G	1.04	4.94e-06	1.04	6.05e-06	1.04	0.00846	1.04	0.000187
rs4955263	3	32264364	8	C	A	1.12	7.11e-06	1.12	8.69e-06	1.08	0.0871	0.87	1.64e-05
rs6549387	3	71432139	9	T	C	1.08	1.45e-06	1.08	1.78e-06	1.09	0.0013	1.07	0.000294
rs143943961	3	76541854	10	C	T	1.17	1.66e-06	1.17	2.02e-06	1.21	0.000772	0.87	0.000507
rs12714497	3	80308261	11	G	A	1.07	3.74e-06	1.07	4.58e-06	1.05	0.0506	0.92	1.22e-05
rs13062850	3	187789708	12	T	A	1.12	5.76e-06	1.12	7.05e-06	1.16	0.000217	0.91	0.00456
rs1445920	5	86093950	13	A	C	0.95	4.51e-06	0.95	5.52e-06	0.94	0.000307	0.96	0.00273
rs17400865	5	103533329	14	T	C	1.06	2.1e-06	1.06	2.57e-06	1.05	0.0117	1.06	5.4e-05
rs11960401	5	133229955	15	C	T	1.09	7.62e-06	1.09	9.3e-06	1.08	0.0158	0.92	0.000155
rs146462216	5	142825005	16	A	G	0.96	7.79e-06	0.96	9.5e-06	0.97	0.0778	1.05	1.96e-05
rs3097165	5	172592710	17	G	A	1.18	3.22e-06	1.18	3.95e-06	1.15	0.0111	0.84	7.99e-05
rs72809316	5	173176479	18	A	G	1.05	5.18e-06	1.05	6.34e-06	1.04	0.0198	1.05	7.44e-05
rs4700924	5	179645870	19	C	A	0.96	2.13e-06	0.96	2.61e-06	0.95	0.000794	1.04	0.000693
rs17135931	6	625188	20	A	C	1.06	5.55e-08	1.06	6.44e-08	1.06	0.000341	0.95	4.21e-05
rs112495680	6	34223098	21	A	G	0.94	4.44e-06	0.94	5.44e-06	0.93	0.000512	0.95	0.00194
rs1873291	6	66344855	22	C	T	0.96	2.37e-06	0.96	2.91e-06	0.95	0.000681	1.04	0.000855
rs9486705	6	97058931	23	T	C	0.9	5.28e-06	0.9	6.46e-06	0.92	0.0186	0.9	8.78e-05
rs2397690	6	100443291	24	T	C	1.05	6.47e-06	1.05	7.92e-06	1.04	0.0114	0.95	0.000174
rs725964	7	13988523	25	C	A	0.96	7.4e-06	0.96	9.04e-06	0.96	0.0504	1.05	4.91e-05
rs718737	7	116883591	26	C	G	0.95	4.34e-06	0.95	5.31e-06	0.95	0.00149	0.95	0.000819
rs56325297	7	153548314	27	A	T	0.9	6.58e-07	0.9	7.97e-07	0.91	0.0017	0.9	0.000111
rs35698191	8	25321845	28	T	A	0.96	5.13e-06	0.96	6.27e-06	0.95	0.000524	1.04	0.00206
rs114323125	8	82740948	29	T	C	0.92	1.61e-06	0.92	1.97e-06	0.91	0.00316	0.92	0.000153
rs721839	9	83216969	30	T	C	0.96	4.32e-06	0.96	5.29e-06	0.96	0.00537	0.95	0.000256
rs495828	9	136154867	31	G	T	1.04	9.68e-06	1.05	9.51e-06	1.07	2.14e-05	0.97	0.0228
rs10795984	10	12856057	32	G	A	0.96	9.96e-07	0.96	1.22e-06	0.97	0.0152	1.05	1.56e-05
rs12251016	10	21821918	33	A	T	0.96	3.78e-07	0.95	4.56e-07	0.94	2.91e-05	0.97	0.00141
rs151257179	10	31084456	34	G	A	1.16	1.36e-06	1.17	1.62e-06	1.25	2.18e-05	0.89	0.0046
rs2474725	10	33484266	35	T	C	0.94	4.55e-06	0.94	5.57e-06	0.95	0.0164	0.93	7.75e-05
rs9645504	10	71560396	36	C	A	1.07	5.77e-06	1.07	7.06e-06	1.07	0.00805	0.93	0.000225
rs7073342	10	73970837	37	C	T	0.96	6.76e-06	0.96	8.27e-06	0.96	0.00662	1.04	0.000331
rs7084339	10	96043732	38	A	G	1.04	5.55e-06	1.04	6.78e-06	1.03	0.0789	1.05	1.05e-05
rs59479500	11	10032985	39	T	G	0.93	5.15e-06	0.93	6.3e-06	0.93	0.00397	0.93	0.000407
rs6488439	12	11774155	40	C	A	0.93	3.81e-06	0.93	4.67e-06	0.9	7.34e-05	1.06	0.00585
rs11836750	12	59105745	41	G	A	1.13	6.5e-06	1.13	7.96e-06	1.11	0.0206	0.87	9.48e-05
rs10859847	12	95591533	42	A	G	0.93	4.52e-06	0.93	5.54e-06	0.92	0.000414	0.94	0.00264
rs938875	15	67952922	43	A	G	1.04	2.88e-06	1.04	3.52e-06	1.04	0.00319	1.04	0.000278
rs12936464	17	7403942	44	A	C	0.99	0.295	1	2.22e-06	1.06	0.000311	1.05	3.37e-05
rs35722758	17	43004835	45	G	C	1.12	8.02e-06	1.14	6.04e-06	1.22	1.3e-05	0.93	0.0169
rs35863760	17	77535069	46	T	C	0.95	7.99e-06	0.95	9.74e-06	0.95	0.017	0.94	0.000134
rs8089784	18	60929065	47	T	G	0.84	7.41e-06	0.84	9.04e-06	0.86	0.006	0.82	0.000329
		SNP: Single Nucleotide Polymorphism; Chr: Chromosome; EA: Effect alleles; NEA: Non effect allele; OR: Odds Ratio; FE: Fixed Effect; RE2: Modified Random Effect
		Endo: Endometriosis; Migr: Migraine

## Sheet: Supplementary_Table4
Supplementary Table 4: Nominally significant (P < 0.05) Vegas2-generated genes for endometriosis
Chr	Gene	nSNPs	nSims	Start Position	Stop Position	Test	Pvalue	TopSNP	TopSNP-pvalue
11	ARL14EP	35	1000000	30344648	30359165	29.4957	9.99999e-07	rs4071559	5.604e-08
12	VEZT	253	1000000	95611521	95696566	35.7871	9.99999e-07	rs4762326	2.201e-09
1	CDC42	88	1000000	22379119	22419436	65.2757	9.99999e-07	rs2268179	6.512e-16
1	LINC00339	40	1000000	22351683	22357717	57.9519	9.99999e-07	rs3768579	2.686e-14
1	WNT4	77	1000000	22443797	22469519	69.2062	9.99999e-07	rs12037376	8.869e-17
2	GREB1	295	1000000	11674241	11782912	71.5773	9.99999e-07	rs11674184	2.666e-17
2	IL1A	27	1000000	113531491	113542971	32.7007	9.99999e-07	rs3783525	1.075e-08
12	FGD6	396	1000000	95470524	95611240	33.627	2e-06	rs6538618	6.676e-09
4	KDR	95	1000000	55944425	55991762	32.8047	2e-06	rs73236104	1.019e-08
6	CCDC170	486	1000000	151815174	151942328	30.2798	4e-06	rs1971256	3.74e-08
12	HOXC-AS1	2	1000000	54392805	54393794	20.8144	7.99999e-06	rs56154542	5.06e-06
2	FN1	202	1000000	216225178	216300791	28.5933	7.99999e-06	rs1250244	8.929e-08
6	SYNE1	1585	1000000	152442818	152958534	31.4743	8.99999e-06	rs71575922	2.021e-08
1	LOC101928846	11	1000000	114466622	114472147	24.3413	9.99999e-06	rs2476598	8.069e-07
3	LINC00620	322	1000000	13692220	13788132	27.7298	1.4e-05	rs6788293	1.395e-07
1	HIPK1	49	1000000	114471995	114520491	24.3325	1.7e-05	rs7551215	8.106e-07
9	CDKN2B-AS1	221	1000000	21994789	22121093	26.5291	1.8e-05	rs10757272	2.596e-07
9	CDKN2A	28	1000000	21967750	21994490	23.5438	2e-05	rs3731211	1.221e-06
17	SKAP1	642	1000000	46210801	46507594	26.9223	2.5e-05	rs2305433	2.118e-07
19	ZNF653	65	1000000	11594241	11616738	22.0561	3.4e-05	rs10417716	2.648e-06
19	LONP1	78	1000000	5691844	5720463	23.7605	3.7e-05	rs12978313	1.091e-06
3	SEC61A1	45	1000000	127771211	127790526	21.1865	4e-05	rs9847934	4.167e-06
1	ATP1B1	86	1000000	169075946	169101960	24.0487	4.1e-05	rs77977611	9.393e-07
5	CWC27	429	1000000	64064754	64314590	24.7227	5.29999e-05	rs10050854	6.62e-07
15	SRP14-AS1	49	1000000	40331511	40359710	21.5192	5.79999e-05	rs749749	3.503e-06
15	FEM1B	18	1000000	68570140	68588203	19.4943	6.89999e-05	rs79903143	1.009e-05
1	DNM3OS	9	1000000	172106018	172113975	18.7969	7.19999e-05	rs2819530	1.454e-05
20	SEC23B	155	1000000	18488187	18542059	22.6685	7.19999e-05	rs6075358	1.925e-06
12	HOXC9	5	1000000	54393876	54397120	17.2593	7.69999e-05	rs1867297	3.261e-05
6	ESR1	1145	1000000	152011630	152424408	26.4326	9.59999e-05	rs2206949	2.729e-07
4	SMR3A	38	1000000	71226492	71232823	20.2848	0.000115	rs17148805	6.673e-06
3	RUVBL1	78	1000000	127799799	127842671	20.0327	0.000119	rs9821568	7.613e-06
12	PARPBP	128	1000000	102513955	102591298	21.2031	0.000121	rs11519706	4.131e-06
8	GDAP1	55	1000000	75262617	75279335	19.6337	0.000123	rs13277749	9.38e-06
12	NUP37	84	1000000	102467972	102512361	20.6158	0.000125	rs11111165	5.613e-06
3	C3orf62	9	1000000	49306029	49314508	17.2047	0.000128	rs6809851	3.356e-05
16	LINC00921	3	1000000	3313767	3317566	15.6811	0.000159	rs224241	7.497e-05
6	FOXC1	2	1000000	1610680	1614129	15.4573	0.000166	rs984253	8.439e-05
10	CASC10	3	1000000	21783420	21786213	16.0058	0.000167	rs12770228	6.315e-05
12	IGF1	125	1000000	102789644	102874378	21.4341	0.000168	rs11111267	3.662e-06
4	SMR3B	43	1000000	71248794	71255961	18.8993	0.000168	rs72655133	1.378e-05
16	MEFV	39	1000000	3292027	3306627	18.2641	0.000178	rs224215	1.923e-05
7	HOXA10	10	1000000	27210209	27219880	17.3951	0.000191	rs6970537	3.036e-05
3	C3orf84	14	1000000	49215068	49229291	16.938	0.000194	rs7429661	3.862e-05
5	C5orf30	37	1000000	102594441	102614361	17.3421	0.000206	rs366437	3.122e-05
10	SKIDA1	6	1000000	21802408	21814611	16.3005	0.000209	rs946711	5.405e-05
19	ECSIT	43	1000000	11616730	11639987	18.1883	0.000215	rs149959265	2.001e-05
16	ZNF263	9	1000000	3333486	3341459	15.7827	0.00022	rs220380	7.105e-05
3	KLHDC8B	7	1000000	49209017	49213919	15.612	0.000223	rs7617480	7.776e-05
7	CALD1	458	1000000	134464163	134655480	23.2507	0.000223	rs12707189	1.422e-06
16	TIGD7	3	1000000	3348807	3355439	14.9967	0.000233	rs7185015	0.0001077
1	RABGAP1L_2	31	1000000	174933904	174964445	18.1265	0.000236	rs55774740	2.067e-05
3	CCDC71	4	1000000	49199967	49203785	15.2012	0.000236	rs4499638	9.664e-05
1	DNM3	1191	1000000	171810617	172381857	24.3511	0.000239	rs495590	8.028e-07
22	APOBEC3F	33	1000000	39436672	39451975	17.7668	0.000245	rs142389364	2.497e-05
1	MRPS14	15	1000000	174982093	174992591	17.3983	0.000258	rs7554767	3.031e-05
22	PLXNB2	53	1000000	50713407	50746001	19.3893	0.000263	rs28718510	1.066e-05
16	PKD1L2	788	1000000	81134483	81253975	23.8694	0.000267	rs4889251	1.031e-06
15	BMF	33	1000000	40380090	40401085	19.0656	0.000275	rs648289	1.263e-05
19	TINCR	18	1000000	5558177	5568005	17.8798	0.000284	rs12983488	2.353e-05
22	SYN3	1519	1000000	32908539	33454377	25.2739	0.00029	rs5754269	4.974e-07
8	NRG1	3255	1000000	31497267	32622558	25.5751	0.000329	rs7000590	4.255e-07
17	CEP112	1835	1000000	63631657	64188212	23.0812	0.000335	rs12601958	1.553e-06
13	NALCN	1174	1000000	101706129	102068813	24.0438	0.000339	rs946025	9.417e-07
12	CCDC53	92	1000000	102406716	102455899	18.605	0.000344	rs79076266	1.608e-05
1	CACYBP	16	1000000	174968570	174981163	16.5808	0.000348	rs1034462	4.662e-05
3	EEFSEC	419	1000000	127872312	128127489	20.3842	0.000348	rs2811472	6.335e-06
11	WT1	172	1000000	32409321	32457081	19.5594	0.000374	rs1569776	9.752e-06
2	LOC101929633	22	1000000	165697258	165705906	16.5719	0.0004	rs2305519	4.684e-05
17	EFTUD2	136	1000000	42927654	42976993	19.6803	0.000403	rs35653192	9.154e-06
1	HAX1	3	1000000	154245038	154248355	14.4439	0.000418	rs13796	0.0001444
16	ZNF75A	18	1000000	3355432	3368576	15.2626	0.000421	rs8054928	9.355e-05
7	HOXA10-HOXA9	23	1000000	27202056	27219880	17.3951	0.000432	rs6970537	3.036e-05
17	KIF18B	65	1000000	43002078	43025079	19.009	0.000439	rs35722758	1.301e-05
1	F5	297	1000000	169481191	169555769	19.9417	0.000442	rs6025	7.984e-06
8	AGO2	258	1000000	141541263	141645646	21.0378	0.000452	rs7832054	4.503e-06
3	TCTA	4	1000000	49449638	49453909	14.2273	0.000457	rs7620024	0.000162
17	SCIMP	80	1000000	5112215	5138155	18.7761	0.000458	rs2585274	1.47e-05
3	CCDC36	60	1000000	49235860	49295537	16.9375	0.000458	rs4384984	3.863e-05
9	HEMGN	29	1000000	100689072	100707197	16.5992	0.000465	rs35527067	4.617e-05
6	RSPO3	112	1000000	127440047	127520626	17.5971	0.000483	rs9285458	2.73e-05
11	FSHB	12	1000000	30252562	30256824	14.5102	0.000486	rs676349	0.0001394
8	NRG1-IT3	5	1000000	32298261	32300241	15.2813	0.000489	rs2347485	9.263e-05
10	SLC18A2	98	1000000	119000583	119038941	18.9428	0.00049	rs363393	1.347e-05
6	FYN	516	1000000	111981534	112194655	21.305	0.000496	rs11153311	3.917e-06
11	PDZD3	3	1000000	119056165	119060932	14.0661	0.000511999	rs73564493	0.0001765
20	BCAS4	260	1000000	49411430	49493714	20.3274	0.000529999	rs6096117	6.526e-06
17	LOC100130950	111	1000000	5095378	5138931	18.7761	0.000531999	rs2585274	1.47e-05
10	MLLT10	115	1000000	21823100	22032559	19.3662	0.000542999	rs7894565	1.079e-05
3	GHSR	16	1000000	172161080	172166246	15.5206	0.000548999	rs482204	8.161e-05
19	THEG5	12	1000000	32079094	32084456	11.7891	0.000549999	rs11882691	0.0005958
19	CATSPERD	106	1000000	5720687	5778742	19.2214	0.000550999	rs34254251	1.164e-05
13	RNF6	8	1000000	26786904	26796508	14.6476	0.000552999	rs1830	0.0001296
20	DTD1	573	1000000	18568555	18744560	20.4739	0.000577999	rs6075413	6.045e-06
7	STYXL1	95	1000000	75625654	75677321	18.0322	0.000590999	rs28634426	2.172e-05
13	MLNR	2	1000000	49794473	49796513	12.0704	0.000602999	rs9568169	0.0005123
17	ZNF594	18	1000000	5082830	5095178	15.7899	0.000609999	rs4115657	7.078e-05
1	DENND1B	256	1000000	197473878	197744623	18.749	0.000641999	rs7548454	1.491e-05
3	APEH	6	1000000	49711434	49720934	13.6666	0.000645999	rs4855882	0.0002183
6	C6orf211	44	1000000	151773392	151791234	15.9447	0.000648999	rs13201167	6.522e-05
19	ARHGAP35	76	1000000	47421932	47508333	16.6802	0.000684999	rs311376	4.424e-05
1	RABGAP1L_1	1501	1000000	174128551	174964445	20.7922	0.000693999	rs4480415	5.119e-06
22	APOL6	51	1000000	36044423	36064456	15.8195	0.000702999	rs5755827	6.968e-05
22	GAB4	171	1000000	17442826	17489112	17.9215	0.000724999	rs5748766	2.302e-05
20	ZNF133	78	1000000	18268926	18297640	17.8108	0.000734999	rs2300816	2.44e-05
7	LOC101926943	28	1000000	74103270	74143256	15.1824	0.000760999	rs74910854	9.761e-05
15	ITGA11	428	1000000	68594041	68724492	20.436	0.000783999	rs113650185	6.166e-06
7	BET1	20	1000000	93620999	93633690	14.2192	0.000799999	rs10257333	0.0001627
9	NR5A1	30	1000000	127243514	127269699	14.5749	0.000813999	rs4838191	0.0001347
17	USP6	88	1000000	5031686	5078324	16.7671	0.000828999	rs3890286	4.226e-05
12	SRRM4	643	1000000	119419299	119600856	20.7751	0.000842999	rs67000224	5.165e-06
1	LOC101928043	8	1000000	22350486	22352541	13.9414	0.000849999	rs2255282	0.0001886
3	NICN1	7	1000000	49459765	49466757	14.596	0.000851999	rs1464569	0.0001332
2	PSD4	99	1000000	113931559	113960677	17.982	0.000895999	rs45488697	2.23e-05
3	USP4	59	1000000	49314576	49377536	16.3434	0.000899999	rs4955414	5.284e-05
8	LINC00977	96	1000000	130228712	130253486	16.8506	0.000904999	rs10096552	4.044e-05
6	SCGN	150	1000000	25652428	25702008	18.3731	0.000944999	rs79368815	1.816e-05
7	GTF2I	59	100000	74071990	74175022	15.1824	0.00098999	rs74910854	9.761e-05
19	SAFB2	69	1000000	5587009	5622938	17.0312	0.000999999	rs2285963	3.677e-05
11	NLRX1	11	100000	119039042	119054726	14.7037	0.00100999	rs45439091	0.0001258
11	CCDC153	10	1000000	119060962	119066584	14.5156	0.001024	rs45514102	0.000139
12	HOXC6	19	100000	54410635	54424607	14.7022	0.00104999	rs736825	0.0001259
3	UBA7	7	100000	49842637	49851391	12.7749	0.00105999	rs1799844	0.0003513
3	RPL24	9	100000	101399933	101405563	14.1037	0.00107999	rs2303473	0.000173
14	LINC00618	7	100000	97409915	97411731	13.5044	0.00108999	rs58881967	0.000238
7	RPS2P32	2	100000	23530006	23531031	11.5723	0.00112999	rs62468795	0.0006694
11	WT1-AS	26	100000	32457284	32461620	15.1142	0.00113999	rs10835908	0.0001012
14	SERPINA2	11	100000	94829974	94833039	14.5693	0.00114999	rs4592582	0.0001351
17	CYB561	14	100000	61509664	61523722	14.319	0.00114999	rs2286572	0.0001543
10	LINC00959	114	100000	131862161	131909081	16.8455	0.00117999	rs78683405	4.055e-05
18	ANKRD30B	57	100000	14748238	14852737	15.0055	0.00117999	rs3903023	0.0001072
2	CKAP2L	37	100000	113495443	113522254	14.6932	0.00118999	rs6753803	0.0001265
1	CRB1	327	100000	197170591	197447585	18.6998	0.00120999	rs76128976	1.53e-05
2	COBLL1	476	100000	165536694	165698678	18.8035	0.00120999	rs355812	1.449e-05
19	MAP2K7	22	100000	7968764	7979363	15.0196	0.00122999	rs2303699	0.0001064
11	RCOR2	5	100000	63678692	63684316	12.3906	0.00123999	rs12292160	0.0004315
12	HOXC5	28	100000	54410635	54429144	14.7022	0.00125999	rs736825	0.0001259
16	SETD6	15	100000	58549382	58554431	14.0789	0.00126999	rs56321292	0.0001753
6	RMND1	164	100000	151725896	151773316	18.1404	0.00126999	rs9371521	2.052e-05
3	USP19	8	100000	49145478	49158371	13.2205	0.00133999	rs4292260	0.0002769
11	CCDC87	2	100000	66357639	66360554	11.2237	0.00134999	rs62000969	0.0008076
17	ZNF232	35	100000	5009030	5026397	15.5538	0.00136999	rs3931085	8.019e-05
11	H19	14	100000	2016405	2019065	13.2287	0.00142999	rs3825028	0.0002757
20	BLCAP	11	100000	36145818	36156333	13.3531	0.00145999	rs6066727	0.000258
2	IL37	39	100000	113670547	113676458	13.5219	0.00147999	rs2723177	0.0002358
1	COL16A1	81	100000	32117847	32169768	16.502	0.00149999	rs4949456	4.86e-05
2	HPCAL1	482	100000	10443029	10567743	19.6112	0.00154998	rs76999946	9.491e-06
2	LAPTM4A	45	100000	20232410	20251789	15.0037	0.00157998	rs79723860	0.0001073
17	SLC35G6	6	100000	7384720	7386383	13.0162	0.00158998	rs9891297	0.0003088
1	ZNF436	23	100000	23685940	23696357	12.9217	0.00161998	rs3795308	0.0003248
1	CPSF3L	2	100000	1246964	1260067	10.0218	0.00165998	rs141612519	0.001547
7	SLC25A13	232	100000	95749531	95951459	17.5916	0.00168998	rs141478780	2.738e-05
11	SIGIRR	16	100000	405715	417397	13.0345	0.00170998	rs10902161	0.0003058
3	RHOA	74	100000	49396578	49449526	15.1635	0.00172998	rs6796147	9.859e-05
19	ELAVL3	46	100000	11562142	11591803	15.2254	0.00173998	rs112113003	9.541e-05
3	OSBPL10-AS1	49	100000	31745704	31763078	14.8746	0.00173998	rs62237308	0.0001149
9	ABO	196	100000	136130562	136150630	16.89	0.00175998	rs2519093	3.961e-05
17	SPECC1	596	100000	19912648	20218072	16.6849	0.00176998	rs2703805	4.413e-05
11	DKFZp779M0652	4	100000	45792982	45793909	12.1652	0.00177998	rs78911884	0.0004869
16	CNOT1	284	100000	58553849	58663790	16.115	0.00177998	rs67946456	5.961e-05
19	POP4	46	100000	30097169	30108162	15.4091	0.00178998	rs2042969	8.657e-05
15	AAGAB	88	100000	67493012	67547536	14.7708	0.00179998	rs7167097	0.0001214
1	LINC00970	644	100000	168873142	169056243	19.7009	0.00179998	rs36013507	9.056e-06
11	MRPL23-AS1	27	100000	2004438	2011150	14.0218	0.00181998	rs76028799	0.0001807
3	ZBTB11	40	100000	101368282	101395988	14.0693	0.00181998	rs61685120	0.0001762
8	KCTD9	67	100000	25285363	25315984	14.0544	0.00181998	rs17053711	0.0001776
1	NME7	769	100000	169101767	169337201	17.593	0.00183998	rs1209731	2.736e-05
3	LAMB2	6	100000	49158546	49170599	12.4765	0.00185998	rs9865051	0.0004121
1	AURKAIP1	2	100000	1309109	1310818	10.9198	0.00186998	rs139833628	0.0009514
3	CDHR4	14	100000	49828166	49837254	13.711	0.00190998	rs6809879	0.0002132
15	IQCH	347	100000	67547137	67794142	17.2628	0.00191998	rs4776924	3.255e-05
3	DAG1	85	100000	49506135	49573051	15.2852	0.00193998	rs7647973	9.244e-05
17	ITGA2B	16	100000	42449549	42466873	13.4677	0.00194998	rs143649376	0.0002427
15	PIAS1	110	100000	68346571	68480404	16.3789	0.00198998	rs117842618	5.186e-05
17	NFE2L1	23	100000	46125685	46138907	14.4478	0.00200998	rs34750858	0.0001441
6	LOC101928516	2013	100000	74779166	75400443	20.2258	0.00200998	rs1578076	6.882e-06
3	MST1	7	100000	49721379	49726196	12.8499	0.00202998	rs3020779	0.0003375
19	ICAM5	21	100000	10400654	10407454	13.849	0.00204998	rs17852402	0.0001981
8	TRPS1	334	100000	116420723	116681255	17.1974	0.00204998	rs2142329	3.369e-05
6	HLA-C	80	100000	31236525	31239913	15.788	0.00208998	rs114536355	7.085e-05
12	PTPRO	552	100000	15475190	15751265	18.7606	0.00212998	rs66716825	1.482e-05
19	SIX5	4	100000	46268042	46272497	11.593	0.00217998	rs2014377	0.000662
3	BSN	125	100000	49591921	49708982	15.1733	0.00218998	rs7625857	9.808e-05
10	ATRNL1	1520	100000	116853123	117708509	19.2495	0.00220998	rs10885768	1.147e-05
7	LINC-PINT_2	388	100000	130626518	130794675	18.282	0.00223998	rs205779	1.905e-05
1	TXNIP	4	100000	145438437	145442628	10.9933	0.00224998	rs7212	0.0009144
17	KRT24	6	100000	38854242	38860002	11.3536	0.00239998	rs874889	0.000753
6	HCG17	301	100000	30201815	30293911	16.6009	0.00241998	rs116810322	4.613e-05
16	DHX38	47	100000	72127614	72146811	14.1157	0.00242998	rs2269918	0.0001719
1	GOLPH3L	100	100000	150618700	150669672	14.5485	0.00243998	rs12731712	0.0001366
22	APOBEC3G	38	100000	39473009	39483748	13.6952	0.00250997	rs12158580	0.000215
1	C1orf213	3	100000	23695463	23698330	11.0246	0.00253997	rs754984	0.0008991
12	RERG	262	100000	15260715	15374411	16.9439	0.00254997	rs17835113	3.85e-05
17	SMARCE1	18	100000	38783975	38804103	12.1705	0.00255997	rs11654834	0.0004855
16	GRIN2A	1651	100000	9847261	10276611	19.9391	0.00258997	rs117578872	7.995e-06
3	NXPE3	74	100000	101498028	101547075	15.2367	0.00261997	rs4683856	9.484e-05
12	HOXC4	50	100000	54410635	54449814	14.7022	0.00262997	rs736825	0.0001259
12	ITGB7	20	100000	53585101	53601091	13.1185	0.00264997	rs7139068	0.0002924
1	POLR3GL	2	100000	145456235	145470387	10.1551	0.00264997	rs2479855	0.001439
7	HOTTIP	11	100000	27240039	27246878	12.0956	0.00272997	rs3807598	0.0005054
16	DDX28	2	100000	68055176	68057770	10.2377	0.00274997	rs237831	0.001376
5	EBF1	720	100000	158122922	158526788	18.9513	0.00279997	rs12153593	1.341e-05
3	FOXP1	1126	100000	71003864	71633140	20.3957	0.00280997	rs17718444	6.297e-06
19	DMPK	16	100000	46272966	46285815	12.6231	0.00285997	rs659444	0.000381
12	CHPT1	71	100000	102091416	102122846	15.1217	0.00287997	rs79513177	0.0001008
12	IL26	61	100000	68595128	68619571	14.6799	0.00287997	rs4913422	0.0001274
13	DLEU1	1035	100000	50656304	51102779	19.2083	0.00290997	rs118169309	1.172e-05
1	MXRA8	8	100000	1288068	1298921	11.2992	0.00291997	rs140427603	0.0007754
1	UBAP2L	63	100000	154192647	154243986	14.4322	0.00291997	rs12354278	0.0001453
8	CDCA2	106	100000	25316512	25365425	14.1344	0.00296997	rs55796651	0.0001702
8	GSDMD	36	100000	144635556	144645231	14.2204	0.00299997	rs1545536	0.0001626
12	KCNA1	17	100000	5019072	5027422	13.143	0.00301997	rs79357862	0.0002886
19	HSD11B1L	7	100000	5680775	5688534	12.0927	0.00301997	rs3097895	0.0005062
1	TMEM57	57	100000	25757348	25826698	10.5387	0.00301997	rs4649086	0.001169
3	QARS	7	100000	49133364	49142562	10.6596	0.00302997	rs4521268	0.001095
14	PPP1R13B	218	100000	104200087	104313927	15.0718	0.00306997	rs61427488	0.0001035
3	BBX	454	100000	107241782	107530176	17.5395	0.00306997	rs9831296	2.814e-05
1	LOC100132111	16	100000	151810944	151816641	12.7638	0.00308997	rs74776487	0.0003534
6	RPP21	8	100000	30312905	30314635	11.8095	0.00311997	rs116471371	0.0005893
17	TNFSF12	32	100000	7452374	7461207	13.7774	0.00312997	rs189650944	0.0002058
8	RHPN1-AS1	3	100000	144448792	144450805	10.0373	0.00319997	rs2467950	0.001534
7	PTN	261	100000	136912091	137028546	17.025	0.00320997	rs322347	3.689e-05
11	SLC37A2	124	100000	124933012	124960412	16.3643	0.00323997	rs10790722	5.226e-05
14	XRCC3	28	100000	104163953	104181823	13.2951	0.00324997	rs861529	0.0002661
18	LINC00683	12	100000	74331733	74335516	12.2867	0.00327997	rs80166024	0.0004562
11	OAF	73	100000	120081746	120100650	14.1985	0.00333997	rs144785834	0.0001645
4	CABS1	6	100000	71200670	71202833	10.897	0.00334997	rs13039	0.0009632
3	CAMKV	15	100000	49895421	49907369	12.0173	0.00335997	rs3796386	0.0005271
17	KRT222	15	100000	38811871	38821416	11.4346	0.00341997	rs67138687	0.0007209
1	PEX11B	2	100000	145516164	145523732	9.85577	0.00342997	rs10910821	0.001693
21	KRTAP10-3	6	100000	45977905	45978643	11.2866	0.00343997	rs448908	0.0007807
2	NMS	52	100000	101086943	101099742	12.0148	0.00343997	rs113797569	0.0005278
7	GNGT1	16	100000	93535819	93540485	12.4648	0.00351996	rs180274	0.0004147
1	TRAF3IP3	77	100000	209929376	209955668	14.2239	0.00352996	rs56057644	0.0001623
3	IP6K1	69	100000	49761727	49823973	13.1307	0.00360996	rs62262730	0.0002905
3	MST1R	21	100000	49924435	49941306	11.8659	0.00360996	rs3733134	0.0005717
15	PEAK1	399	100000	77400497	77712446	16.1757	0.00361996	rs117681417	5.773e-05
14	DLGAP5	71	100000	55614833	55658396	13.6727	0.00364996	rs76123662	0.0002176
17	HOXB1	3	100000	46606806	46608272	8.8099	0.00369996	rs7207109	0.002996
3	RNF123	37	100000	49726949	49758962	12.8394	0.00369996	rs11709734	0.0003394
2	FOSL2	33	100000	28615778	28637516	13.2741	0.00371996	rs4617998	0.0002691
15	OTUD7A	501	100000	31775328	31947542	17.4166	0.00373996	rs77544153	3.002e-05
6	FILIP1	232	100000	76017799	76203545	15.9654	0.00376996	rs12209223	6.451e-05
13	FNDC3A	201	100000	49550047	49783915	15.279	0.00377996	rs9568168	9.274e-05
1	MINOS1-NBL1	156	100000	19923470	19984949	15.2383	0.00380996	rs147430921	9.476e-05
19	ZNF333	93	100000	14800869	14831772	13.558	0.00381996	rs4808304	0.0002313
17	LOC101927166	53	100000	46522194	46543402	13.3633	0.00382996	rs8072770	0.0002566
22	CABP7	31	100000	30116343	30127820	13.3393	0.00386996	rs9614041	0.0002599
12	C12orf71	10	100000	27233989	27235455	11.8604	0.00388996	rs61920403	0.0005734
11	SYT12	23	100000	66790189	66818334	13.6283	0.00389996	rs10896149	0.0002228
22	MYH9	247	100000	36677322	36784063	16.4266	0.00390996	rs11703871	5.057e-05
22	MB	49	100000	36002810	36019401	12.7172	0.00392996	rs5750135	0.0003623
10	ADD3	129	100000	111765725	111895323	14.9061	0.00395996	rs61881617	0.000113
1	FBLIM1	48	100000	16085254	16113084	13.9655	0.00395996	rs867321	0.0001862
22	LOC101927257	6	100000	40917803	40922711	10.0506	0.00397996	rs5757983	0.001523
17	SNX11	48	100000	46184919	46200105	13.8283	0.00403996	rs2072441	0.0002003
16	ABCC6	149	100000	16243421	16317328	15.3874	0.00404996	rs169844	8.757e-05
12	CSAD	22	100000	53551446	53574693	11.3119	0.00410996	rs35014624	0.0007701
19	LRRC8E	38	100000	7953389	7966908	13.5338	0.00410996	rs794454	0.0002343
10	INPP5A	377	100000	134351352	134596984	16.2963	0.00412996	rs2803989	5.417e-05
17	TNFSF12-TNFSF13	38	100000	7452374	7464925	13.7774	0.00415996	rs189650944	0.0002058
18	ROCK1	69	100000	18529702	18691812	12.5771	0.00415996	rs112763730	0.0003905
17	BAIAP2	336	100000	79008946	79091232	17.119	0.00421996	rs4969367	3.511e-05
5	RARS	141	100000	167913462	167946309	13.9574	0.00421996	rs2445785	0.000187
14	OR4E2	4	100000	22133296	22134238	10.227	0.00422996	rs2874103	0.001384
12	AVPR1A	19	100000	63536538	63546590	12.6977	0.00424996	rs117072097	0.0003661
6	HIST1H2AA	5	100000	25726290	25726790	10.6179	0.00426996	rs6940348	0.00112
15	C15orf61	10	100000	67813521	67819641	11.7152	0.00437996	rs62015089	0.0006199
22	SELO	53	100000	50639407	50656045	13.8133	0.00437996	rs2294402	0.0002019
16	DYNC1LI2	48	100000	66754798	66785525	11.3978	0.00438996	rs12600097	0.0007353
15	SRP14	12	100000	40327890	40331389	12.0095	0.00440996	rs2291620	0.0005293
17	POLR2A	116	100000	7387697	7417935	13.9827	0.00440996	rs9890935	0.0001845
13	SLC46A3	25	100000	29274217	29293150	12.2012	0.00444996	rs1306892	0.0004776
7	SNHG15	11	100000	45022626	45026259	11.6559	0.00447996	rs6463256	0.00064
3	MON1A	19	100000	49946301	49967445	12.0975	0.00451995	rs35275715	0.0005049
9	LINC01239	534	100000	22646198	22824212	17.0857	0.00454995	rs10965430	3.573e-05
20	LINC00489	37	100000	36247699	36251521	11.8436	0.00455995	rs4339013	0.0005786
8	NRBP2	6	100000	144915754	144923146	10.7746	0.00457995	rs12550634	0.001029
11	OR4A47	2	100000	48510344	48511274	8.1931	0.00459995	rs7103992	0.004205
11	NLRP10	10	100000	7981155	7985059	11.4545	0.00461995	rs988455	0.0007132
7	TMEM120A	19	100000	75616154	75623992	12.6148	0.00464995	rs11767816	0.0003827
2	PAX8-AS1	119	100000	113993103	114024600	14.5498	0.00465995	rs13405033	0.0001365
7	MDH2	42	100000	75677336	75696827	12.3923	0.00466995	rs144486980	0.0004311
14	JDP2	120	100000	75894508	75939404	15.1428	0.00467995	rs117382013	9.968e-05
19	NCCRP1	9	100000	39687603	39692522	9.51229	0.00467995	rs12985483	0.002041
1	LIX1L	4	100000	145477066	145501669	8.92496	0.00467995	rs7521222	0.002813
17	ATP2A3	107	100000	3827162	3867758	14.2566	0.00468995	rs33997766	0.0001595
5	FAM169A	164	100000	74073398	74162663	13.6813	0.00468995	rs16872364	0.0002166
17	MYH13	229	100000	10204182	10276322	15.7424	0.00469995	rs62060458	7.258e-05
10	ECD	76	100000	74894281	74927853	10.1992	0.00470995	rs7087762	0.001405
1	MINOS1	66	100000	19923470	19956315	12.9327	0.00472995	rs116342788	0.0003229
2	PAX8	210	100000	113973573	114036498	15.3928	0.00473995	rs67802835	8.732e-05
11	KRTAP5-7	2	100000	71238312	71239210	8.3168	0.00476995	rs147685834	0.003928
3	IFRD2	2	100000	50325162	50330026	9.25932	0.00477995	rs138558275	0.002343
11	EIF3M	44	100000	32605312	32624037	12.776	0.00478995	rs201882	0.0003511
6	LOC100132735	212	100000	140092209	140181608	15.1384	0.00483995	rs6940946	9.991e-05
13	ATP8A2	1734	100000	25946208	26595420	18.8448	0.00485995	rs12871941	1.418e-05
4	SPATA5	1051	100000	123844224	124240604	16.4599	0.00485995	rs11098679	4.969e-05
6	FAM120B	273	100000	170599790	170716159	15.4273	0.00488995	rs117327682	8.574e-05
1	CCDC185	7	100000	223566714	223568812	9.35977	0.00489995	rs111306873	0.002218
12	GOLGA3	204	100000	133345494	133405426	15.4654	0.00490995	rs112239823	8.403e-05
13	KLF5	43	100000	73629113	73651680	13.3379	0.00490995	rs9573096	0.0002601
7	PDK4	43	100000	95212808	95225925	12.6374	0.00490995	rs55879823	0.0003781
2	CD28	64	100000	204571197	204603636	13.4136	0.00491995	rs35988305	0.0002498
9	OLFML2A	31	100000	127539436	127577170	11.8912	0.00491995	rs7855360	0.000564
3	TRAIP	35	100000	49866027	49893992	12.1284	0.00492995	rs7649428	0.0004966
1	NBL1	50	100000	19969722	19984949	13.8922	0.00493995	rs3762388	0.0001936
20	PLAGL2	9	100000	30780306	30795546	10.0664	0.00493995	rs3787371	0.00151
1	SPRR3	19	100000	152974222	152976332	10.0542	0.00494995	rs28924721	0.00152
8	LOC100288748	6	100000	95649512	95651695	10.4357	0.00495995	rs2162237	0.001236
17	VPS25	2	100000	40925453	40931618	8.93342	0.00496995	rs2305218	0.0028
7	ELMO1	1657	100000	36892510	37488929	19.3609	0.00498995	rs71539816	1.082e-05
3	ATP2B2	579	100000	10365706	10547268	18.0296	0.00499995	rs34855	2.175e-05
5	LINC00491	180	100000	101944195	102007168	13.5966	0.00507995	rs2657433	0.0002266
7	SHFM1	47	100000	96318078	96339203	13.3278	0.00509995	rs13224800	0.0002615
3	RBM6	223	100000	49977476	50114685	14.2413	0.00511995	rs12488521	0.0001608
3	RBM5	26	100000	50126340	50156397	12.0872	0.00515995	rs1061474	0.0005077
3	CEP97	66	100000	101443493	101486181	13.0358	0.00516995	rs9845802	0.0003056
11	LDLRAD3	879	100000	35965611	36252841	18.2278	0.00517995	rs75505895	1.96e-05
12	FBXO21	140	100000	117581584	117628300	12.5529	0.00519995	rs7489177	0.0003956
12	GNPTAB	150	100000	102139274	102224645	14.5075	0.00520995	rs79493678	0.0001396
14	LOC101929080	41	100000	95795920	95801841	12.5829	0.00520995	rs12885564	0.0003893
16	CA7	11	100000	66878281	66888049	10.7075	0.00524995	rs36685	0.001067
22	TUBGCP6	75	100000	50656117	50683400	14.543	0.00524995	rs11703226	0.000137
1	PEF1	20	100000	32095462	32110838	11.0385	0.00525995	rs6425777	0.0008924
2	ORC4	118	100000	148687965	148779173	13.3214	0.00525995	rs3768684	0.0002624
11	CBL	111	100000	119076985	119178859	13.6761	0.00528995	rs4938644	0.0002172
14	FBXO34	146	100000	55738020	55820329	13.3684	0.00529995	rs79634820	0.0002559
1	EPRS	259	100000	220141941	220220000	14.1837	0.00529995	rs2647458	0.0001658
13	SLC25A30	42	100000	45967453	45992590	12.3949	0.00531995	rs6561228	0.0004305
21	KRTAP10-2	7	100000	45970317	45971388	9.72276	0.00534995	rs233237	0.00182
11	COMMD9	90	100000	36293841	36310999	13.9058	0.00536995	rs11033524	0.0001922
11	BARX2	244	100000	129245880	129322174	16.2551	0.00537995	rs80075684	5.536e-05
1	SLAMF7	27	100000	160708846	160724608	12.0704	0.00538995	rs78937709	0.0005123
1	CA14	4	100000	150230217	150237480	10.1874	0.00540995	rs115624500	0.001414
2	ZSWIM2	92	100000	187692206	187713897	12.2486	0.00543995	rs10191209	0.0004656
15	DAPK2	432	100000	64199234	64338521	15.8326	0.00546995	rs922179	6.92e-05
18	LOC100505592	27	100000	3466247	3478976	11.2401	0.00547995	rs10048393	0.0008005
1	ANKRD34A	3	100000	145470507	145475647	9.75639	0.00550994	rs704984	0.001787
19	SIGLEC6	65	100000	52022783	52035110	12.7141	0.00557994	rs10221457	0.0003629
12	TAS2R19	2	100000	11174270	11175170	8.83876	0.00558994	rs12313469	0.002949
20	TAF4	215	100000	60549853	60640866	13.2651	0.00559994	rs61547040	0.0002704
2	BMPR2	287	100000	203241049	203432474	15.1469	0.00565994	rs111536773	9.946e-05
8	SOX7	24	100000	10581277	10588084	12.4833	0.00568994	rs7005905	0.0004106
14	STRN3	282	100000	31363004	31495607	14.351	0.00570994	rs10138011	0.0001517
5	LOC285593	16	100000	173006636	173012071	11.3683	0.00570994	rs12152984	0.0007471
4	SYNPO2	681	100000	119771842	119982402	17.3555	0.00582994	rs72671610	3.1e-05
2	LOC644838	233	100000	67350488	67442451	15.2479	0.00583994	rs17528091	9.428e-05
11	SCGB1D2	8	100000	62009723	62012280	11.0974	0.00593994	rs3927343	0.0008645
19	FOXA3	18	100000	46367517	46377055	11.8063	0.00600994	rs7254364	0.0005903
2	FIGN	187	100000	164464117	164592513	14.7739	0.00600994	rs60160544	0.0001212
3	GPX1	2	100000	49394608	49395791	7.77651	0.00604994	rs1050450	0.005293
1	LOC100506985	80	100000	24865763	24882515	13.2409	0.00606994	rs147127733	0.0002739
10	RNLS	638	100000	90033620	90343082	16.917	0.00613994	rs792215	3.905e-05
12	CISTR	11	100000	54144230	54150818	11.4726	0.00616994	rs12423000	0.0007063
6	C6orf15	17	100000	31078999	31080332	11.7252	0.00621994	rs2233977	0.0006166
4	KCTD8	587	100000	44175919	44450824	16.7275	0.00622994	rs77298092	4.315e-05
9	GADD45G	2	100000	92219926	92221469	8.59655	0.00623994	rs3138503	0.003368
5	CAST	275	100000	95997740	96110385	15.6628	0.00625994	rs26506	7.57e-05
3	IGSF11-AS1	10	100000	118661922	118667088	10.306	0.00628994	rs28592657	0.001326
17	TANC2	520	100000	61086897	61505067	14.9914	0.00638994	rs3760257	0.000108
6	TRIM39-RPP21	24	100000	30297087	30314635	11.8095	0.00644994	rs116471371	0.0005893
10	DNAJC1	276	100000	22045476	22292650	14.1544	0.00645994	rs3951780	0.0001684
10	NUDT13	40	100000	74870132	74891586	10.6096	0.00646994	rs72812275	0.001125
19	DMWD	17	100000	46286263	46296060	11.6498	0.00647994	rs8110017	0.0006421
5	SLC25A2	5	100000	140682195	140683612	9.54404	0.00653993	rs111702937	0.002006
17	GPATCH8	126	100000	42472644	42580957	13.4416	0.00657993	rs117994523	0.0002461
8	PENK	18	100000	57353512	57359282	10.608	0.00661993	rs2609999	0.001126
16	FAM57B	8	100000	30035747	30042186	9.60546	0.00664993	rs78424502	0.00194
17	ZBTB4	55	100000	7362684	7387568	13.0586	0.00669993	rs59665520	0.0003019
17	CD300LG	24	100000	41924515	41940997	11.6699	0.00673993	rs80053172	0.0006352
14	SERPINA6	77	100000	94770584	94789688	13.5274	0.00677993	rs56252611	0.0002351
11	TSGA10IP	16	100000	65713114	65727434	10.7532	0.00681993	rs67530871	0.001041
6	ALDH8A1	47	100000	135238527	135271260	11.7391	0.00688993	rs1028314	0.000612
16	LOC101928203	35	100000	76668894	76692375	12.198	0.00690993	rs75469918	0.0004784
17	C17orf74	3	100000	7328934	7330886	9.25932	0.00690993	rs72842820	0.002343
11	TALDO1	22	100000	747431	765024	11.8536	0.00694993	rs56340568	0.0005755
11	PKP3	20	100000	394216	404908	11.0162	0.00695993	rs7105848	0.0009032
3	KBTBD12	117	100000	127641901	127706514	13.558	0.00703993	rs9845449	0.0002313
3	NPHP3-AS1	453	100000	132441185	132593050	14.8101	0.00703993	rs74410875	0.0001189
3	SCN11A	227	100000	38887259	38995142	14.3924	0.00704993	rs7433733	0.0001484
20	PMEPA1	122	100000	56223447	56286592	14.1289	0.00705993	rs157082	0.0001707
7	ZNF804B	1845	100000	88388752	88966346	18.3616	0.00705993	rs801836	1.827e-05
6	CMTR1	44	100000	37400906	37449284	12.7829	0.00706993	rs2776910	0.0003498
3	ZMYND10	2	100000	50378536	50383156	7.92227	0.00717993	rs2301639	0.004883
9	RFK	29	100000	79000432	79009444	11.9643	0.00717993	rs11144870	0.0005423
1	HORMAD1	57	100000	150670534	150693364	11.606	0.00719993	rs112126423	0.0006574
4	PDE6B	110	100000	619362	664681	11.9712	0.00719993	rs72613109	0.0005403
6	RUNX2_2	184	100000	45390313	45518819	14.4192	0.00724993	rs6930053	0.0001463
1	RAB13	2	100000	153954092	153958853	8.46774	0.00726993	rs2230324	0.003615
22	RFPL3	56	100000	32750871	32757148	12.4984	0.00726993	rs72620407	0.0004073
1	ZMYM6NB	6	100000	35447126	35450948	7.89141	0.00729993	rs7362	0.004967
14	FOS	8	100000	75745480	75748937	9.93802	0.00732993	rs1063169	0.001619
20	RBBP9	20	100000	18467187	18477887	11.852	0.00741993	rs12481476	0.000576
8	TNKS	743	100000	9413444	9639856	15.3587	0.00743993	rs4338107	8.891e-05
9	NR6A1	73	100000	127279553	127533589	10.334	0.00744993	rs10986358	0.001306
6	LRRC16A	1389	100000	25279655	25620758	17.9457	0.00746993	rs79415097	2.273e-05
1	RHCE	37	100000	25688739	25747363	10.6212	0.00747993	rs2982348	0.001118
20	CHGB	39	100000	5891973	5906005	11.4671	0.00747993	rs742710	0.0007084
1	SRP9	32	100000	225965514	225978168	12.55	0.00749993	rs11583073	0.0003962
3	SSUH2	55	100000	8661085	8693764	13.4778	0.00749993	rs241051	0.0002414
6	PNPLA1	169	100000	36210944	36276372	15.1123	0.00749993	rs7775107	0.0001013
11	OR8G1	98	100000	124120422	124135756	11.3867	0.00751992	rs12805787	0.0007397
12	SMUG1	16	100000	54574141	54582778	10.3973	0.00752992	rs971	0.001262
17	PER1	19	100000	8043787	8055753	11.5992	0.00758992	rs2253820	0.0006598
1	HCRTR1	21	100000	32083300	32092919	10.2164	0.00759992	rs4949449	0.001392
2	LOC101928222	31	100000	20189964	20204567	11.7234	0.00763992	rs11677637	0.0006172
5	MAST4	1228	100000	65892175	66465423	17.5937	0.00767992	rs74911958	2.735e-05
17	TMEM107	14	100000	8076296	8079714	10.5356	0.00769992	rs11655582	0.001171
20	LINC00176	7	100000	62665696	62671315	10.1861	0.00769992	rs3829704	0.001415
10	HSPA14	38	100000	14880158	14913740	11.8174	0.00770992	rs10906772	0.0005868
6	PSORS1C2	19	100000	31105310	31107127	12.2522	0.00770992	rs2072108	0.0004647
11	LOC649133	31	100000	120120467	120136641	11.2522	0.00780992	rs116989966	0.0007953
11	ABCG4	19	100000	119019749	119033374	11.0223	0.00785992	rs4148173	0.0009002
17	PRKAR1A	324	100000	66409763	66547457	15.4047	0.00785992	rs11653551	8.677e-05
4	TMPRSS11B	23	100000	69092370	69111412	10.5074	0.00791992	rs7691640	0.001189
11	TMEM135	1420	100000	86748885	87039876	16.6357	0.00794992	rs2512494	4.529e-05
14	OR6S1	7	100000	21108854	21109850	9.19785	0.00794992	rs45443395	0.002423
3	MIR548H2	714	100000	151347319	151542394	15.9168	0.00795992	rs1520142	6.619e-05
2	NDUFS1	91	100000	206987802	207024243	12.4509	0.00799992	rs141585422	0.0004178
12	MIP	6	100000	56843285	56848435	9.38473	0.00813992	rs1082214	0.002188
20	FLRT3	21	100000	14304638	14318313	11.0972	0.00824992	rs204605	0.0008646
1	PBXIP1	7	100000	154916558	154928567	9.59319	0.00825992	rs2061690	0.001953
5	LOC101929412	34	100000	10493638	10502840	11.7358	0.00825992	rs76532749	0.0006131
11	P2RY2	36	100000	72929342	72953472	12.2571	0.00832992	rs4382936	0.0004635
1	RPS6KA1	81	100000	26856248	26901520	12.6449	0.00837992	rs2296399	0.0003766
17	GFAP	34	100000	42982993	42992920	12.2818	0.00845992	rs2289671	0.0004574
6	VARS2	43	100000	30881981	30894235	10.4583	0.00854991	rs114969940	0.001221
12	ZNF740	17	100000	53574534	53584654	10.0111	0.00867991	rs3814778	0.001556
16	CCDC154	68	100000	1484388	1494490	13.1352	0.00867991	rs4786392	0.0002898
18	OSBPL1A	471	100000	21742010	21977833	16.2486	0.00868991	rs1843830	5.555e-05
1	OLFML3	3	100000	114522012	114524876	8.81661	0.00875991	rs3789614	0.002985
2	AGAP1	1228	100000	236402732	237040444	17.3845	0.00877991	rs7604970	3.053e-05
5	NNT-AS1	49	100000	43573286	43603332	11.0011	0.00880991	rs113386497	0.0009106
6	HDDC2	86	10000	125596495	125623282	11.4663	0.00889911	rs2318093	0.0007087
12	MAP1LC3B2	63	100000	116997185	117014425	13.1983	0.00890991	rs8181674	0.0002802
7	ITGB8	292	10000	20370724	20455382	14.15	0.0089991	rs12700188	0.0001688
15	SMAD3	346	100000	67358194	67487533	15.6535	0.00902991	rs7173811	7.607e-05
19	ICAM1	32	10000	10381516	10397291	12.4495	0.00909909	rs923366	0.0004181
8	RHPN1	39	10000	144451024	144466390	11.8038	0.00909909	rs3812439	0.0005911
11	BSCL2	26	10000	62457733	62477091	10.6817	0.00919908	rs11605489	0.001082
1	WNT3A	74	10000	228194722	228248972	12.2438	0.00919908	rs76933265	0.0004668
17	HLF	111	10000	53342320	53402426	14.0918	0.00929907	rs2270378	0.0001741
17	PFAS	53	10000	8152595	8173809	12.3019	0.00929907	rs4792701	0.0004525
19	SIGLEC12	83	10000	51994480	52005043	13.0785	0.00929907	rs59128868	0.0002987
19	LYPLA2P2	4	100000	7943516	7945117	9.24143	0.00931991	rs12459317	0.002366
6	SCML4	344	100000	108023360	108145521	14.5443	0.00938991	rs72933130	0.0001369
1	PRSS38	101	10000	228003417	228034171	12.4747	0.00939906	rs28660431	0.0004125
15	LYSMD4	19	100000	100267605	100273649	10.8335	0.00941991	rs76746018	0.0009968
17	KSR1	255	100000	25799035	25950718	14.4167	0.00941991	rs9303652	0.0001465
19	ZFP36	2	10000	39897486	39900052	8.18492	0.00949905	rs17885410	0.004224
19	ERICH4	4	100000	41949062	41950670	9.15751	0.0095899	rs3745286	0.002477
11	SLC22A12	33	10000	64358281	64369825	11.0133	0.00959904	rs117280820	0.0009046
12	TM7SF3	113	10000	27124505	27167339	13.5306	0.00959904	rs10842824	0.0002347
17	CBX1	89	10000	46147413	46178883	12.8169	0.00959904	rs12103663	0.0003435
1	MRPL37	40	10000	54665839	54684056	11.5203	0.00959904	rs6693202	0.0006884
2	ZAP70	45	10000	98330030	98356323	12.1325	0.00959904	rs11683207	0.0004955
3	KLHL18	46	10000	47324329	47388306	11.8273	0.00959904	rs295433	0.0005837
4	BMP2K	152	10000	79697531	79833341	11.3767	0.00959904	rs144133371	0.0007437
5	APC	245	10000	112043201	112181936	13.4981	0.00959904	rs62364022	0.0002388
5	SCAMP1	294	10000	77656326	77776562	12.9654	0.00959904	rs147576878	0.0003173
11	OR52N2	9	10000	5841565	5842531	9.03955	0.00969903	rs4758435	0.002642
13	DOCK9	856	10000	99445740	99738660	15.5893	0.00969903	rs7399679	7.87e-05
15	VPS33B	67	10000	91541645	91565851	11.544	0.00969903	rs182789659	0.0006797
1	AK5	953	10000	77747661	78025654	16.7066	0.00969903	rs17378915	4.363e-05
3	SEMA3F	50	100000	50192847	50226508	11.9468	0.0097699	rs12631337	0.0005474
17	CHRNB1	29	10000	7348405	7360932	10.7891	0.00979902	rs7215056	0.001021
1	ARNT	63	10000	150782180	150849244	11.8436	0.00979902	rs11204734	0.0005786
1	PRRX1	111	10000	170633312	170708541	13.3794	0.00979902	rs6701640	0.0002544
3	LRRC2-AS1	14	10000	46598887	46601178	9.65633	0.00979902	rs2280411	0.001887
4	UBE2D3	132	10000	103715539	103790050	11.841	0.00979902	rs28444377	0.0005794
5	CEP72	118	10000	612404	653666	11.9732	0.00979902	rs57334652	0.0005397
5	LOC100996325	22	10000	602283	612325	10.5884	0.00979902	rs58495827	0.001138
17	WIPI1	94	10000	66417421	66453653	13.029	0.00989901	rs3785609	0.0003067
20	TRMT6	47	10000	5918478	5931204	11.1235	0.00989901	rs73596146	0.0008524
3	HRH1	315	10000	11178778	11304939	15.0125	0.00989901	rs11128542	0.0001068
3	QRICH1	38	10000	49067141	49131504	11.1456	0.00989901	rs6787808	0.0008423
5	NSA2	18	10000	74062815	74072737	9.84062	0.00989901	rs5020673	0.001707
8	DDHD2	20	10000	38089008	38120287	9.01345	0.00989901	rs72644707	0.00268
1	IL10	16	10000	206940947	206945839	10.4934	0.009999	rs3024492	0.001198
1	SCYL3	136	10000	169822214	169863100	12.6528	0.009999	rs12117794	0.000375
1	METTL18	6	10000	169761669	169764061	9.41174	0.010099	rs74504221	0.002156
7	COPG2	191	10000	130146079	130353598	13.1645	0.010099	rs2129906	0.0002853
11	EIF1AD	21	100000	65764015	65769637	10.0254	0.0101299	rs72930945	0.001544
12	ANKLE2	124	10000	133302252	133338474	13.7466	0.010199	rs78408032	0.0002092
12	DDX47	37	10000	12966279	12982915	11.7621	0.010199	rs11055086	0.0006045
17	CRK	81	10000	1324646	1359561	11.7593	0.010199	rs75332312	0.0006054
1	TCEA3	104	10000	23707554	23751261	12.3798	0.010199	rs10917375	0.000434
6	TRIM10	15	10000	30119722	30128711	9.98874	0.010199	rs116525154	0.001575
7	MMD2	223	10000	4931875	4998844	14.3988	0.010199	rs7800341	0.0001479
4	ASB5	224	100000	177134825	177190373	14.4348	0.0101999	rs4690676	0.0001451
6	LIN28B	136	10000	105404922	105531207	13.395	0.010299	rs62419627	0.0002523
11	CEND1	5	10000	787109	790126	9.17085	0.010399	rs113628861	0.002459
6	RUNX2_1	429	10000	45296053	45518819	14.4192	0.010399	rs6930053	0.0001463
6	SLC17A1	136	10000	25783125	25832287	12.6608	0.010399	rs9467602	0.0003734
20	MACROD2-IT1	194	100000	14535029	14609554	13.2273	0.0104899	rs73612369	0.0002759
15	PGPEP1L	130	10000	99511458	99551024	13.2266	0.010499	rs144284032	0.000276
4	PDGFRA	118	10000	55095263	55164412	12.4571	0.010499	rs73252949	0.0004164
6	REV3L	340	10000	111620233	111804918	13.7305	0.010499	rs2300660	0.000211
8	FAM49B	313	10000	130851838	131028897	15.1785	0.010499	rs117046451	9.781e-05
11	NRXN2	113	10000	64373645	64490660	11.7772	0.0106989	rs117582772	0.0005996
3	ITGB5	361	10000	124481794	124606144	13.6538	0.0106989	rs2333023	0.0002198
6	AIM1	262	10000	106959729	107018334	14.0618	0.0106989	rs111693188	0.0001769
8	GRINA	4	10000	145064225	145067583	8.268	0.0106989	rs67714660	0.004035
13	DNAJC15	188	100000	43597361	43683306	12.9182	0.0107099	rs73190310	0.0003254
1	PPAP2B	236	100000	56960418	57045257	13.8835	0.0107799	rs1777283	0.0001945
12	DDIT3	3	10000	57910370	57914300	7.2722	0.0107989	rs703836	0.007003
15	RHCG	24	10000	90014639	90039844	10.2471	0.0107989	rs79465116	0.001369
5	FGF18	69	10000	170846666	170884630	12.6804	0.0107989	rs11738946	0.0003695
5	LOC101928539	24	10000	57186157	57194989	10.2457	0.0107989	rs35100619	0.00137
12	RDH16	12	10000	57345215	57351418	10.235	0.0108989	rs746049	0.001378
18	KIAA1328	638	10000	34409079	34805288	14.5945	0.0108989	rs62083211	0.0001333
20	SAMD10	15	10000	62605465	62610995	9.17085	0.0108989	rs817344	0.002459
3	LSMEM2	4	10000	50316517	50325545	8.49921	0.0108989	rs12635953	0.003553
3	SLC25A20	21	10000	48894355	48936426	9.74716	0.0108989	rs7611358	0.001796
14	ZFYVE21	36	10000	104182080	104200005	12.0722	0.0109989	rs2295150	0.0005118
22	APOBEC3A	8	10000	39353526	39359188	9.62736	0.0109989	rs1977069	0.001917
2	E2F6	27	10000	11584500	11606303	10.6681	0.0109989	rs6739146	0.00109
1	KIFAP3	395	10000	169890469	170043879	13.1391	0.0110989	rs140705206	0.0002892
22	MAPK11	16	10000	50702141	50708822	10.3482	0.0110989	rs2076139	0.001296
22	RFPL3S	85	10000	32755892	32767251	12.0433	0.0110989	rs58028985	0.0005198
6	LOC101928519	294	10000	19068773	19180711	13.7332	0.0110989	rs143439730	0.0002107
16	MT1A	8	10000	56672577	56673999	8.23236	0.0111989	rs8049883	0.004115
16	NPRL3	60	10000	135803	188697	11.5271	0.0111989	rs6600233	0.0006859
17	FGF11	6	10000	7342688	7348251	9.07378	0.0111989	rs9906416	0.002593
2	NCOA1	348	10000	24807345	24993570	13.7619	0.0111989	rs11125751	0.0002075
4	PDGFC	247	10000	157682762	157892546	13.5974	0.0111989	rs72683358	0.0002265
5	OXCT1	132	10000	41730166	41870791	12.5877	0.0111989	rs114143386	0.0003883
3	CYB561D2_1	4	10000	50388125	50405628	7.42539	0.0112989	rs77217288	0.006431
10	ASCC1	175	10000	73855789	73976892	12.6513	0.0113989	rs11819693	0.0003753
11	PTPN5	148	10000	18749474	18814268	13.9685	0.0113989	rs921082	0.0001859
10	P4HA1	125	10000	74766979	74856732	9.2422	0.0114989	rs72812271	0.002365
11	ARAP1	175	10000	72396113	72463434	13.457	0.0114989	rs10898870	0.0002441
11	MPPED2	474	10000	30406039	30607930	14.9296	0.0114989	rs10835663	0.0001116
19	ABHD17A	19	10000	1876974	1885518	9.87873	0.0114989	rs11669774	0.001672
19	LOC644189	3	10000	36912075	36913799	6.7832	0.0114989	rs2945948	0.009202
4	SCD5	733	10000	83550689	83720010	15.4794	0.0114989	rs17005990	8.341e-05
6	TFAP2B	63	10000	50786438	50815326	11.7146	0.0114989	rs66462826	0.0006201
8	SCRIB	44	10000	144873089	144897549	11.1281	0.0114989	rs4874099	0.0008503
12	PLXNC1	519	10000	94542498	94701451	15.8239	0.0115988	rs2291331	6.952e-05
16	CCDC79	67	10000	66788878	66835523	10.9794	0.0115988	rs363162	0.0009213
16	TMEM219	14	10000	29973350	29984373	9.34332	0.0115988	rs56357065	0.002238
17	EFNB3	8	10000	7608519	7614693	9.00189	0.0115988	rs72829467	0.002697
2	IL1B	12	10000	113587336	113594356	9.83954	0.0115988	rs1143634	0.001708
5	PPP1R2P3	4	10000	156277548	156279539	7.56115	0.0115988	rs62619239	0.005964
13	LINC00367	47	10000	21512702	21523567	10.534	0.0116988	rs74480820	0.001172
14	LOC102724890	15	10000	27278553	27289909	10.5949	0.0116988	rs79552719	0.001134
16	ITGAX	35	10000	31366454	31394318	11.6423	0.0116988	rs7190997	0.0006447
20	LOC101929698	20	10000	31097761	31108088	10.177	0.0116988	rs293566	0.001422
2	FLJ31356	15	10000	28607275	28617539	10.0591	0.0116988	rs1509396	0.001516
6	CCDC167	30	10000	37450696	37467700	11.44	0.0116988	rs931649	0.0007188
7	DDX56	30	10000	44605015	44614137	9.76671	0.0116988	rs17725305	0.001777
14	LRRC9	211	10000	60386430	60530277	12.0173	0.0117988	rs309004	0.0005271
14	NAA30	19	10000	57857270	57879466	9.96898	0.0117988	rs150361128	0.001592
19	LOC388553	27	10000	46242887	46262748	10.6047	0.0117988	rs725660	0.001128
1	NRD1	119	10000	52254865	52344609	12.125	0.0117988	rs1770791	0.0004975
3	HYAL3	3	10000	50330258	50336899	8.24076	0.0117988	rs74398439	0.004096
5	STARD4	15	10000	110834021	110848157	9.76258	0.0117988	rs17458866	0.001781
6	DOPEY1	134	10000	83777384	83878190	11.6658	0.0117988	rs13218698	0.0006366
6	METTL24	259	10000	110567148	110679475	13.6709	0.0117988	rs2092739	0.0002178
11	BANF1	8	10000	65769549	65771617	9.51589	0.0118988	rs72930967	0.002037
1	HTR6	31	10000	19991779	20007459	10.6886	0.0118988	rs3790757	0.001078
16	NAE1	32	10000	66836780	66864879	10.3726	0.0119988	rs7186114	0.001279
10	CDNF	32	10000	14861250	14879983	11.1456	0.0120988	rs11259359	0.0008423
5	GCNT4	8	10000	74323288	74326724	8.37747	0.0120988	rs34018438	0.003799
5	SLCO6A1	420	10000	101707485	101834720	13.0487	0.0120988	rs56218837	0.0003035
6	TRAF3IP2-AS1	237	10000	111804674	111923497	13.9766	0.0120988	rs80250323	0.0001851
7	GPR146	8	10000	1097140	1098897	8.95772	0.0120988	rs2293523	0.002763
2	TFPI	169	10000	188328957	188419219	13.3157	0.0121988	rs13028645	0.0002632
12	TAS2R31	5	10000	11182985	11184006	8.81417	0.0122988	rs10772423	0.002989
15	MAPK6	37	10000	52311410	52358462	11.526	0.0122988	rs113048394	0.0006863
19	KLF16	26	10000	1852397	1863564	9.95171	0.0122988	rs56289648	0.001607
20	POFUT1	30	10000	30795695	30826467	10.2257	0.0122988	rs6141639	0.001385
3	PRKAR2A-AS1	2	10000	48885369	48889415	7.29648	0.0122988	rs9830636	0.006909
4	FGFRL1	49	10000	1005609	1020686	11.162	0.0122988	rs4647930	0.0008349
1	AK4	177	10000	65613231	65697828	12.477	0.0123988	rs112436703	0.000412
17	NOL11	67	10000	65714060	65740266	10.5658	0.0124988	rs6504526	0.001152
10	ADK	704	10000	75910942	76469061	13.6744	0.0126987	rs7918318	0.0002174
18	FAM69C	67	10000	72102962	72124503	12.4724	0.0126987	rs118108146	0.000413
3	CRELD1	18	10000	9975523	9987097	10.0361	0.0126987	rs36029198	0.001535
12	IFNG	5	10000	68548549	68553521	8.16188	0.0127987	rs2430561	0.004278
10	OBFC1	99	10000	105637317	105678045	11.5128	0.0128987	rs10748858	0.0006912
16	SMG1	265	10000	18816174	18937726	11.6139	0.0128987	rs12447894	0.0006546
2	MATN3	44	10000	20191812	20212455	11.7234	0.0128987	rs11677637	0.0006172
4	AGA	26	10000	178351928	178363657	10.7215	0.0128987	rs4690523	0.001059
12	RPL13P5	3	10000	6993144	6993768	7.24371	0.0129987	rs12817264	0.007115
14	PCNXL4	84	10000	60558628	60601532	10.0922	0.0129987	rs308999	0.001489
10	CTAGE7P	5	10000	131904272	131907101	8.57345	0.0130987	rs1177699	0.003411
11	CCDC73	517	10000	32623625	32816204	13.6325	0.0130987	rs1396995	0.0002223
11	INS	5	10000	2181008	2182439	7.87619	0.0130987	rs689	0.005009
14	TRMT5	8	10000	61438166	61447797	8.13871	0.0130987	rs2296927	0.004333
16	DCUN1D3	58	10000	20869395	20911561	11.1965	0.0130987	rs74978879	0.0008195
6	HGC6.3	2	10000	168376603	168377619	7.2065	0.0130987	rs2516607	0.007264
4	BMP3	47	10000	81952118	81978685	10.0325	0.0131987	rs72868585	0.001538
10	CREM	171	10000	35415768	35501886	11.6861	0.0132987	rs188333977	0.0006297
12	TIMELESS	67	10000	56810156	56843200	10.6834	0.0132987	rs2638286	0.001081
13	LINC00571	208	10000	38624953	38717369	13.7511	0.0132987	rs9315551	0.0002087
17	BPTF	193	10000	65821779	65980494	10.8436	0.0132987	rs118105213	0.0009914
6	TRIM26	65	10000	30152231	30181271	10.7373	0.0132987	rs115640156	0.00105
16	ADAT1	82	10000	75632246	75657221	11.5184	0.0133987	rs79731960	0.0006891
18	LOC101927651	112	10000	74334737	74350968	12.2867	0.0133987	rs80166024	0.0004562
6	ZBTB2	51	10000	151685249	151712677	11.4577	0.0133987	rs6557132	0.000712
12	FAM19A2	1347	10000	62102028	62586620	16.8761	0.0134987	rs10877762	3.99e-05
1	NBPF20	334	10000	144146810	146467744	13.6099	0.0134987	rs833941	0.000225
3	CAV3	48	10000	8775485	8788451	11.5203	0.0134987	rs237875	0.0006884
5	AP3B1	597	10000	77298149	77590579	14.0063	0.0134987	rs28833541	0.0001822
16	LMF1	554	10000	903634	1031318	14.3522	0.0135986	rs71382302	0.0001516
1	NBPF10	334	10000	145293370	146466121	13.6099	0.0135986	rs833941	0.000225
14	LINC00637	27	10000	104314057	104324386	9.41089	0.0136986	rs7140323	0.002157
15	GPR176	222	10000	40091222	40213093	14.0125	0.0136986	rs118051307	0.0001816
21	LOC400863	48	10000	35321229	35336262	10.5466	0.0136986	rs139225221	0.001164
3	CNTN6	1360	10000	1134341	1445292	16.9768	0.0136986	rs58445416	3.784e-05
5	MIER3	93	10000	56215428	56247954	11.3857	0.0136986	rs252897	0.0007401
8	GINS4	40	10000	41386724	41402565	11.2424	0.0136986	rs62507829	0.0007995
8	LINC00208	12	10000	11434043	11438850	8.8593	0.0136986	rs2127128	0.002916
2	UGGT1	222	10000	128848753	128953249	12.1488	0.0137986	rs34362305	0.0004912
5	GIN1	86	10000	102421703	102455842	10.2701	0.0137986	rs154265	0.001352
9	MIR181A2HG	11	10000	127420714	127460907	7.34632	0.0137986	rs10818985	0.00672
19	LPPR3	35	10000	812487	821952	10.6546	0.0138986	rs61504683	0.001098
2	LINC00276	523	10000	14368997	14541082	13.8767	0.0138986	rs1126093	0.0001952
10	LINC00200	22	10000	1205707	1210612	10.0676	0.0139986	rs60248962	0.001509
2	APLF	244	10000	68694690	68807294	12.1374	0.0139986	rs141250842	0.0004942
1	SKINTL	222	10000	48567386	48648100	13.121	0.0140986	rs2134477	0.000292
2	FBXO48	2	10000	68689504	68694390	5.99211	0.0140986	rs113552873	0.01437
6	SFTA2	4	10000	30899126	30899952	7.5506	0.0140986	rs116619003	0.005999
11	B4GALNT4	18	10000	369794	382117	9.02852	0.0141986	rs7483942	0.002658
11	SART1	45	10000	65729159	65747607	10.4919	0.0141986	rs72928828	0.001199
12	TAS2R20	11	10000	11148560	11150474	7.74572	0.0141986	rs12226920	0.005384
1	NDUFS5	31	10000	39491966	39500308	10.3185	0.0141986	rs7546089	0.001317
1	PGD	45	10000	10459084	10480201	10.4061	0.0141986	rs1049887	0.001256
2	IL36RN	44	10000	113816214	113822320	9.11444	0.0141986	rs2278717	0.002536
12	SNRPF	25	10000	96252708	96260238	10.6345	0.0142986	rs74393306	0.00111
3	SKIL	81	10000	170075472	170114637	11.2285	0.0142986	rs116543149	0.0008055
7	CREB5	1507	10000	28338939	28865511	17.3641	0.0142986	rs71539564	3.086e-05
13	ST13P4	2	10000	50746153	50747751	7.26631	0.0143986	rs146228921	0.007026
16	PRSS8	3	10000	31142753	31147151	7.65135	0.0143986	rs147208188	0.005673
1	ALDH4A1	90	10000	19197923	19229293	11.9615	0.0143986	rs77024177	0.0005431
7	UBE2H	367	10000	129470572	129592800	13.0993	0.0143986	rs62489377	0.0002954
12	PXMP2	32	10000	133264191	133281577	10.7675	0.0144986	rs10781630	0.001033
17	NUP88	161	10000	5289345	5323059	11.5431	0.0144986	rs141781082	0.00068
2	CALCRL	221	10000	188206689	188313021	13.0873	0.0144986	rs6744012	0.0002973
2	SNRNP27	15	10000	70121074	70132368	8.79414	0.0145985	rs3752781	0.003022
3	TOPBP1	152	10000	133319448	133380737	12.3135	0.0145985	rs78996709	0.0004497
12	ATP5B	8	10000	57031958	57039852	8.15258	0.0146985	rs2950394	0.0043
19	PRSS57	75	10000	685545	695461	11.1707	0.0146985	rs62131271	0.000831
17	CCDC144CP	45	10000	20224486	20305504	10.9319	0.0147985	rs67217337	0.0009452
18	CCBE1	909	10000	57098170	57364644	15.6446	0.0147985	rs1893957	7.643e-05
2	RGPD4-AS1	6	10000	108439519	108442583	7.86575	0.0147985	rs831989	0.005038
3	TIPARP	52	10000	156392204	156424557	10.7819	0.0147985	rs346003	0.001025
1	SETDB1	49	10000	150898814	150937220	11.1711	0.0148985	rs12735566	0.0008308
20	CASC20	369	10000	6407378	6509106	13.1423	0.0148985	rs75281696	0.0002887
22	TIMP3	116	10000	33196801	33259028	12.6553	0.0148985	rs242085	0.0003745
4	CC2D2A	276	10000	15471488	15603180	14.0396	0.0148985	rs10021522	0.000179
7	CBX3	18	10000	26240830	26253227	8.64645	0.0148985	rs10247665	0.003277
12	LOC101928002	59	10000	70107412	70132348	11.3559	0.0149985	rs76204681	0.0007521
2	LOC102800447	568	10000	67313577	67516376	15.2479	0.0149985	rs17528091	9.428e-05
12	NDUFA12	163	10000	95365103	95397489	12.2422	0.0150985	rs147654736	0.0004672
1	PRKACB	194	10000	84543744	84704181	12.6528	0.0150985	rs2389717	0.000375
21	OLIG1	2	10000	34442449	34444728	6.1924	0.0150985	rs11554600	0.01283
11	KCNE3	32	10000	74165885	74178600	10.7891	0.0151985	rs11236112	0.001021
20	LOC101929526	76	10000	18655038	18679352	11.3365	0.0151985	rs17809054	0.00076
16	MT1E	5	10000	56659584	56661024	8.57505	0.0152985	rs708274	0.003408
5	LINC00492	113	10000	101917071	101953291	10.9343	0.0152985	rs3105477	0.000944
14	ADAM21P1	10	10000	70712469	70714518	9.42883	0.0153985	rs2296918	0.002136
7	NUB1	119	10000	151038846	151075548	12.5099	0.0153985	rs387859	0.0004048
10	ANAPC16	37	10000	73975757	73995618	10.1259	0.0154985	rs7092282	0.001462
1	PHC2	118	10000	33789223	33841194	11.7171	0.0154985	rs12138864	0.0006193
1	UCK2	129	10000	165796731	165880855	12.7188	0.0154985	rs7533364	0.000362
9	COL27A1	545	10000	116918230	117072975	15.9056	0.0154985	rs77404783	6.658e-05
17	LINC00511	152	10000	70594179	70636611	13.1757	0.0155984	rs12951259	0.0002836
19	PAF1	10	10000	39876269	39881835	9.03127	0.0155984	rs117303406	0.002654
8	LSM1	17	10000	38020838	38034248	9.22219	0.0155984	rs2954117	0.002391
8	PTK2	424	10000	141668480	142011412	12.3436	0.0155984	rs6980530	0.0004425
15	SPINT1	36	10000	41136245	41149853	10.2377	0.0156984	rs583031	0.001376
3	TMEM30C	24	10000	99904667	99913030	9.52583	0.0156984	rs6810262	0.002026
4	IDUA	61	10000	980784	998345	12.0197	0.0156984	rs148959726	0.0005264
6	CRISP2	53	10000	49660070	49681303	11.2419	0.0156984	rs141006904	0.0007997
14	HAUS4	18	10000	23415436	23426351	9.29166	0.0157984	rs2295687	0.002302
1	REN	40	10000	204123943	204135465	10.8631	0.0157984	rs11240688	0.000981
3	SPICE1	261	10000	113161564	113234034	11.7315	0.0157984	rs113000505	0.0006145
5	SREK1IP1	63	10000	64013977	64064496	10.2217	0.0157984	rs80017437	0.001388
6	SLC39A7	3	10000	33168602	33172214	7.69807	0.0157984	rs41266701	0.005528
8	LINC00251	50	10000	66073379	66092575	10.7945	0.0157984	rs77476195	0.001018
10	ACTA2	122	10000	90694830	90751147	12.7564	0.0158984	rs41284110	0.0003548
10	HPS6	2	10000	103825123	103827795	7.05532	0.0158984	rs3816	0.007903
11	HNRNPUL2-BSCL2	47	10000	62457733	62494856	10.6817	0.0158984	rs11605489	0.001082
17	HOXB2	7	10000	46620018	46622393	8.19224	0.0158984	rs1042815	0.004207
1	HSD3BP4	30	10000	120106502	120115199	9.71973	0.0158984	rs12731874	0.001823
1	BCAN	20	10000	156611739	156629324	9.48552	0.0159984	rs12118135	0.002071
19	FSD1	49	10000	4304590	4323843	10.8695	0.0160984	rs112598039	0.0009776
3	BSN-AS2	2	10000	49586738	49591799	6.92351	0.0160984	rs3811697	0.008507
12	IGFBP6	4	10000	53491435	53496128	8.01545	0.0161984	rs9658605	0.004638
14	FBXO33	86	10000	39865576	39901704	11.5849	0.0161984	rs34785385	0.0006649
16	TERF2	34	10000	69389463	69419891	10.3468	0.0161984	rs166134	0.001297
1	THEM5	12	10000	151819576	151826173	8.59331	0.0161984	rs116408212	0.003374
20	UCKL1-AS1	4	10000	62584736	62588338	7.47735	0.0161984	rs79599197	0.006248
6	TCF19	31	10000	31126302	31131992	10.3199	0.0161984	rs114471122	0.001316
11	TRIM49B	17	10000	49053151	49059529	8.64311	0.0162984	rs2727042	0.003283
3	LOC100132146	61	10000	46653924	46668033	11.2366	0.0162984	rs112322237	0.000802
17	MFSD6L	5	10000	8700427	8702667	8.1931	0.0163984	rs2242374	0.004205
17	STRA13	7	10000	79976578	79980785	7.73502	0.0163984	rs4077074	0.005416
8	SLC25A32	55	10000	104410865	104427563	10.6546	0.0163984	rs118081385	0.001098
12	POU6F1	66	10000	51580718	51611477	11.6614	0.0164984	rs117427833	0.0006381
16	COG7	73	10000	23399813	23464512	9.17234	0.0164984	rs74661112	0.002457
1	PMVK	19	10000	154897207	154909484	9.1494	0.0164984	rs1109815	0.002488
2	PRR30	4	10000	27359714	27362332	7.67149	0.0164984	rs3795961	0.00561
5	LOC101927023	70	10000	111563979	111593006	11.6867	0.0164984	rs34819608	0.0006295
1	SNAP47	94	10000	227922696	227968932	11.369	0.0165983	rs66969031	0.0007468
8	GOLGA7	53	10000	41348080	41368499	10.6732	0.0165983	rs12545679	0.001087
16	DUS2	61	10000	68056846	68113226	10.2377	0.0166983	rs237831	0.001376
1	LOC440700	40	10000	165667986	165679199	10.7639	0.0166983	rs7537704	0.001035
1	DR1	23	10000	93811477	93828148	9.06885	0.0167983	rs1570528	0.0026
19	OCEL1	25	10000	17337054	17340028	9.6312	0.0168983	rs3745163	0.001913
11	ACAD8	23	10000	134123433	134135746	9.77709	0.0169983	rs74339999	0.001767
17	FAM171A2	7	10000	42431100	42441235	8.29474	0.0169983	rs71371993	0.003976
12	ANHX	18	10000	133794897	133812422	9.3606	0.0170983	rs142613020	0.002217
14	C14orf93	25	10000	23456109	23479410	9.65341	0.0170983	rs3751497	0.00189
9	TMEM252	6	10000	71151497	71155783	7.50846	0.0170983	rs404994	0.006141
11	CABP2	3	10000	67286417	67290899	7.36056	0.0171983	rs2276118	0.006667
11	CLCF1	16	10000	67131638	67141648	9.37221	0.0171983	rs72932730	0.002203
14	RIN3	587	10000	92980124	93155334	15.591	0.0171983	rs734206	7.863e-05
16	PMFBP1	126	10000	72152995	72206349	11.7701	0.0171983	rs8050238	0.0006019
12	GPR182	2	10000	57388354	57390469	5.73184	0.0172983	rs12099695	0.01666
2	LOC101927907	154	10000	77213090	77236914	10.7215	0.0172983	rs4853290	0.001059
5	CTD-2201I18.1	25	10000	79362171	79379488	10.5658	0.0172983	rs17879514	0.001152
20	TSPY26P	3	10000	30776948	30778163	6.73499	0.0173983	rs11907235	0.009454
22	APOBEC3H	61	10000	39493228	39500072	9.96898	0.0173983	rs78724870	0.001592
8	DLGAP2-AS1	228	10000	1513675	1569830	12.3264	0.0173983	rs2956920	0.0004466
9	GCNT1	248	10000	79056581	79122332	13.1057	0.0173983	rs57339182	0.0002944
17	MYO1C	57	10000	1367479	1396001	11.7602	0.0174983	rs76446640	0.0006051
17	SMYD4	168	10000	1682828	1733175	11.5536	0.0174983	rs9893456	0.0006762
3	IGSF11	614	10000	118619478	118864898	14.0832	0.0174983	rs76136755	0.0001749
12	SYT10	188	10000	33528347	33592754	11.8562	0.0175982	rs10844589	0.0005747
19	ARHGEF18	342	10000	7459998	7537371	12.56	0.0175982	rs1968256	0.0003941
19	FSTL3	15	10000	676388	683392	9.65341	0.0175982	rs3826953	0.00189
6	GPLD1	379	10000	24426061	24489850	13.7737	0.0175982	rs7738679	0.0002062
7	FZD1	4	10000	90893782	90898132	7.07929	0.0175982	rs1052015	0.007798
14	AKAP5	10	10000	64932216	64941221	8.88642	0.0176982	rs2230491	0.002873
16	CMIP	959	10000	81478774	81745367	16.3998	0.0176982	rs7192273	5.129e-05
3	P4HTM	8	10000	49027340	49044581	7.58856	0.0176982	rs7434187	0.005874
3	TCAIM	117	10000	44379610	44450940	10.9836	0.0176982	rs7627186	0.0009192
5	ATP6AP1L	18	10000	81601165	81614147	8.94323	0.0176982	rs658912	0.002785
10	LINC00866	38	10000	99588234	99609555	11.2047	0.0177982	rs872570	0.0008159
10	SORCS1	1289	10000	108333420	108924466	16.022	0.0177982	rs11193149	6.261e-05
1	RNU5F-1	611	10000	220046618	220292777	14.1837	0.0178982	rs2647458	0.0001658
10	IDI1	20	10000	1085963	1095061	10.0028	0.0179982	rs2472533	0.001563
15	PHGR1	16	10000	40643233	40648634	9.39566	0.0179982	rs35777573	0.002175
1	MRPS21	46	10000	150266261	150281414	10.1848	0.0179982	rs138496123	0.001416
2	LRP1B	7040	10000	140988995	142889270	19.197	0.0180982	rs10928133	1.179e-05
10	ABCC2	137	10000	101542354	101611949	12.0226	0.0181982	rs28532665	0.0005256
19	ZNF177	37	10000	9473695	9493293	8.15807	0.0181982	rs2217652	0.004287
7	AOAH	574	10000	36552548	36764154	15.0232	0.0181982	rs11971903	0.0001062
9	RPP25L	2	10000	34610481	34612110	6.62247	0.0181982	rs117925060	0.01007
12	LOC101928244	102	10000	117537271	117579294	12.3525	0.0182982	rs73206028	0.0004404
22	APOBEC3A_B	12	10000	39353526	39388783	9.62736	0.0182982	rs1977069	0.001917
4	NUDT6	96	10000	123813798	123844159	10.3639	0.0182982	rs13134412	0.001285
12	PGAM5	38	10000	133287392	133299323	10.973	0.0183982	rs7486453	0.0009245
1	TNR	1081	10000	175291934	175712752	15.7489	0.0183982	rs12036416	7.233e-05
14	SLC38A6	113	10000	61447831	61550451	11.1514	0.0184982	rs7152640	0.0008397
19	ZNF559	35	10000	9434447	9454521	8.64089	0.0184982	rs13535	0.003287
10	AP3M1	56	10000	75880014	75910826	9.46351	0.0185981	rs35601073	0.002096
11	POLD4	4	10000	67118235	67121067	7.28869	0.0185981	rs6560	0.006939
13	HSPH1	54	10000	31709110	31736525	9.29963	0.0185981	rs4943165	0.002292
19	ZNF559-ZNF177	96	10000	9434901	9493293	8.64089	0.0185981	rs13535	0.003287
8	STK3	470	10000	99466858	99954799	13.6632	0.0185981	rs76780722	0.0002187
15	IQCH-AS1	169	10000	67695948	67814182	11.7953	0.0186981	rs56108040	0.0005938
1	THEM4	79	10000	151843342	151882361	10.4417	0.0186981	rs115847329	0.001232
3	AGTR1	111	10000	148415657	148460790	11.5263	0.0186981	rs2638355	0.0006862
8	ZNF696	33	10000	144373558	144382120	9.17682	0.0186981	rs75697679	0.002451
1	WNT9A	59	10000	228109164	228135676	10.5183	0.0187981	rs1418422	0.001182
1	LOC100130093	13	10000	227916239	227922055	8.77492	0.0188981	rs6664307	0.003054
5	GABRA1	132	10000	161274196	161326965	11.5571	0.0188981	rs1457706	0.0006749
10	MINPP1	68	10000	89264222	89313218	10.6989	0.0189981	rs78291708	0.001072
17	RPTOR	1597	10000	78518624	78940173	16.1995	0.0189981	rs8074643	5.701e-05
1	ASCL5	4	10000	201083080	201084500	7.44508	0.0189981	rs3738263	0.006361
1	JMJD4	11	10000	227918889	227923112	9.14646	0.0189981	rs2273938	0.002492
3	RBP2	54	10000	139171725	139195352	8.99648	0.0189981	rs2118981	0.002705
5	AGXT2	179	10000	34998205	35048240	12.608	0.0189981	rs6892674	0.0003841
16	SLC12A4	18	10000	67977376	68002597	8.98906	0.0190981	rs255057	0.002716
18	OACYLP	77	10000	56702970	56720446	11.9916	0.0190981	rs4458107	0.0005344
19	ZNF175	62	10000	52074530	52092991	11.3445	0.0190981	rs145146134	0.0007567
3	AMT	9	10000	49454210	49460111	7.52762	0.0190981	rs10640	0.006076
3	RASSF1	9	10000	50367216	50378367	8.31819	0.0190981	rs79536844	0.003925
9	LINC00950	7	10000	35860270	35865515	8.31265	0.0190981	rs12552435	0.003937
12	SOAT2	91	10000	53497273	53518323	10.7873	0.0191981	rs12825176	0.001022
6	CD83	51	10000	14117486	14137148	11.2278	0.0191981	rs77714440	0.0008058
19	IGSF23	65	10000	45116939	45140081	11.3458	0.0192981	rs79572806	0.0007562
19	PTBP1	40	10000	797391	812327	9.74409	0.0192981	rs351995	0.001799
20	ZNF512B	26	10000	62588056	62601223	9.55413	0.0192981	rs7273242	0.001995
3	MORC1	400	10000	108677086	108836993	12.0707	0.0192981	rs144108186	0.0005122
9	ACO1	151	10000	32384600	32450832	12.7797	0.0192981	rs6476361	0.0003504
2	PTPRN	38	10000	220154344	220174295	9.98174	0.0193981	rs6736979	0.001581
10	NRP1	537	10000	33466418	33623833	14.3117	0.0194981	rs182093735	0.0001549
13	CTAGE10P	18	10000	50464544	50467516	9.86012	0.0194981	rs61747168	0.001689
17	ASPSCR1	34	10000	79935425	79975282	9.63408	0.0194981	rs9912553	0.00191
17	SLC25A35	11	10000	8191081	8198170	9.05833	0.0194981	rs11245	0.002615
3	CCDC12	68	10000	46963219	47023500	10.9461	0.0194981	rs13092573	0.000938
6	EPM2A	218	10000	145946439	146056991	11.4029	0.0194981	rs1292335	0.0007333
8	CLDN23	13	10000	8559665	8561617	8.34148	0.0194981	rs12548737	0.003875
10	NRBF2	36	10000	64893006	64914791	9.54038	0.019598	rs7073746	0.00201
3	SEMA3B	7	10000	50304989	50314602	8.38226	0.019598	rs3755832	0.003789
7	LHFPL3-AS1	16	10000	104436953	104444539	9.31086	0.019598	rs4582489	0.002278
13	DNAJC3	114	10000	96329392	96447243	11.8757	0.019698	rs6492820	0.0005687
14	PTGER2	37	10000	52781015	52795322	9.2314	0.019698	rs11851457	0.002379
3	LSG1	145	10000	194361516	194393206	11.6489	0.019698	rs111430861	0.0006424
5	C5orf34	40	10000	43486802	43515273	9.06815	0.019698	rs6885326	0.002601
16	FLJ26245	3	10000	34980922	34990995	7.07906	0.019798	rs34151874	0.007799
22	ZNRF3-AS1	22	10000	29420986	29427464	9.42626	0.019798	rs8142591	0.002139
8	SDR16C5	34	10000	57212569	57233241	10.3326	0.019798	rs12056722	0.001307
13	LOC101927437	669	10000	100393123	100609419	15.4643	0.019898	rs6491535	8.408e-05
11	LOC100506082	48	10000	4208381	4223883	10.1297	0.019998	rs4910923	0.001459
1	RBM8A	2	10000	145507556	145513535	6.55483	0.019998	rs147038428	0.01046
20	POLR3F	39	10000	18448032	18465292	9.80963	0.019998	rs73108909	0.001736
6	HMGA1	12	10000	34204576	34214008	7.89871	0.019998	rs73744859	0.004947
7	TMED4	7	10000	44618761	44621827	7.70953	0.019998	rs3750098	0.005493
8	TRPA1	216	10000	72933485	72987819	11.775	0.019998	rs10111216	0.0006003
10	TRUB1	56	10000	116697951	116737439	9.87653	0.020098	rs77087468	0.001674
11	USP2	47	10000	119225924	119252436	10.7075	0.020098	rs11217253	0.001067
5	GFM2	86	10000	74017028	74063196	10.1297	0.020098	rs6453075	0.001459
6	GMDS	1395	10000	1624034	2245868	16.1548	0.020098	rs3800046	5.837e-05
12	RAD52	95	10000	1021254	1058863	10.8411	0.020198	rs4987208	0.0009927
16	DEXI	17	10000	11022747	11036257	10.0482	0.020198	rs6498135	0.001525
17	TMEM95	3	10000	7258496	7260538	7.02633	0.020198	rs3744406	0.008032
1	IRF6	55	10000	209958967	209979520	9.72074	0.020198	rs2013196	0.001822
2	ITGB6	289	10000	160956176	161056824	12.708	0.020198	rs75394489	0.0003641
5	N4BP3	25	10000	177540555	177553107	9.90534	0.020198	rs55727122	0.001648
1	LOR	6	10000	153232178	153234600	8.33867	0.020298	rs1143390	0.003881
3	DALRD3	4	10000	49052920	49058504	7.39103	0.020298	rs3087866	0.006555
5	C5orf22	59	10000	31532372	31555165	10.7267	0.020298	rs12658729	0.001056
11	GAL3ST3	14	10000	65808235	65816651	8.73535	0.020398	rs4930170	0.003121
19	FBXO46	19	10000	46213886	46234151	9.74307	0.020398	rs6509234	0.0018
1	FAM131C	42	10000	16384263	16400127	9.83954	0.020398	rs77818589	0.001708
3	ARHGEF3-AS1	68	10000	56974067	56994880	10.0579	0.020398	rs142046236	0.001517
3	WDR6	5	10000	49044636	49053386	7.35652	0.020398	rs7100	0.006682
6	MLLT4	334	10000	168227670	168372700	11.4829	0.020398	rs9505710	0.0007024
14	MAP4K5	145	10000	50885210	50999376	11.1722	0.020498	rs12881869	0.0008303
22	MKL1	316	10000	40806284	41032723	12.4185	0.020498	rs34503826	0.0004251
1	SPRR1B	17	10000	153003678	153005376	6.50618	0.0205979	rs59969719	0.01075
19	PPP1R14A	16	10000	38741876	38747231	8.30023	0.0206979	rs8100395	0.003964
20	FAM65C	258	10000	49202644	49308067	12.7417	0.0206979	rs60070831	0.0003576
5	MAPK9	143	10000	179660594	179719071	12.164	0.0206979	rs6877489	0.0004872
16	LMF1-AS1	85	10000	971032	984524	10.4996	0.0207979	rs11248955	0.001194
2	HNRNPLL	62	10000	38790327	38830178	10.495	0.0207979	rs77480198	0.001197
13	CLYBL	818	10000	100258917	100561713	15.4643	0.0208979	rs6491535	8.408e-05
13	PAN3-AS1	3	10000	28710979	28713311	6.70227	0.0208979	rs61260403	0.009629
13	RNF113B	3	10000	98828038	98829521	5.65759	0.0208979	rs628778	0.01738
1	SPRR2D	3	10000	153012200	153013594	5.59323	0.0208979	rs1048296	0.01803
2	TRAF3IP1	225	10000	239229184	239309541	11.882	0.0208979	rs6716870	0.0005668
3	RPL35A	10	10000	197677051	197682721	7.36921	0.0208979	rs61215870	0.006635
19	DPRX	6	10000	54135309	54140263	6.84078	0.0209979	rs11672792	0.00891
20	LINC00493	8	10000	18548072	18550203	7.94164	0.0209979	rs6075366	0.004831
12	GNN	435	10000	104237526	104323989	12.6739	0.0210979	rs1992207	0.0003708
1	LOC653160	3	10000	35441299	35444307	5.76591	0.0210979	rs12562704	0.01634
3	FSTL1	155	10000	120113060	120169918	11.7716	0.0211979	rs1259339	0.0006014
1	NMNAT2	396	10000	183217371	183387634	13.1823	0.0212979	rs2276879	0.0002826
3	SCAP	42	10000	47455183	47517445	10.2579	0.0212979	rs11712590	0.001361
7	WBSCR17	1832	10000	70597522	71178586	16.4165	0.0212979	rs4719152	5.084e-05
13	ARGLU1	17	10000	107195661	107220514	8.84185	0.0213979	rs144119373	0.002944
3	EMC3-AS1	61	10000	10028576	10048687	9.63889	0.0213979	rs6786231	0.001905
4	CISD2	41	10000	103790134	103813963	9.31327	0.0213979	rs113827356	0.002275
13	LINC00297	63	10000	30446749	30462542	10.3482	0.0214979	rs80056801	0.001296
9	LRRC8A	53	10000	131644390	131680317	9.78648	0.0214979	rs75370325	0.001758
10	CUBN	1130	10000	16865964	17171816	15.4676	0.0215978	rs1801232	8.393e-05
11	SCGB1D4	10	10000	62063753	62066536	8.6604	0.0215978	rs56196602	0.003252
15	HDC	52	10000	50534145	50558162	10.6395	0.0215978	rs854163	0.001107
2	ABHD1	8	10000	27346656	27353680	7.99372	0.0215978	rs2304678	0.004694
6	SMLR1	40	10000	131148544	131158276	9.92668	0.0215978	rs9402291	0.001629
6	TRAF3IP2	128	10000	111876580	111927477	11.9585	0.0215978	rs74954073	0.000544
20	TM9SF4	105	10000	30697308	30755061	9.87653	0.0216978	rs6089190	0.001674
10	C10orf62	3	10000	99349449	99350691	6.21741	0.0217978	rs11540693	0.01265
11	TRIM64C	13	10000	49075265	49080664	8.22356	0.0217978	rs2773242	0.004135
12	MBD6	7	10000	57916658	57923931	7.27734	0.0217978	rs2620679	0.006983
12	ZNF891	29	10000	133696554	133707059	8.79776	0.0217978	rs7975140	0.003016
2	LINC01247	36	10000	6506141	6515554	9.37221	0.0217978	rs1026612	0.002203
7	INTS1	87	10000	1509912	1544018	8.90751	0.0217978	rs111391955	0.00284
8	INTS9	185	10000	28625174	28747698	12.0357	0.0217978	rs78479460	0.0005219
11	FGF19	4	10000	69513005	69519106	7.49589	0.0218978	rs72475636	0.006184
11	MMP12	21	10000	102733463	102745764	9.89643	0.0218978	rs11225443	0.001656
12	LOC100240734	2	10000	54495992	54496483	5.38677	0.0218978	rs12308675	0.02029
13	ERCC5	68	10000	103498190	103528351	11.0123	0.0218978	rs4150374	0.0009051
3	CISH	7	10000	50643884	50649262	8.21001	0.0218978	rs78292306	0.004166
5	ARRDC3-AS1	34	10000	90676163	90716532	8.96103	0.0218978	rs2042339	0.002758
11	PRRG4	74	10000	32851480	32879669	10.4223	0.0219978	rs80113380	0.001245
17	SPDYE4	11	10000	8656423	8661877	8.22488	0.0220978	rs76500808	0.004132
16	MAF	17	10000	79627744	79634622	9.80118	0.0221978	rs1046958	0.001744
3	AADAC	78	10000	151531860	151546276	10.0971	0.0221978	rs73016413	0.001485
5	PAIP1	48	10000	43526369	43557521	9.44609	0.0221978	rs113835829	0.002116
1	RGS1	9	10000	192544856	192549159	8.65984	0.0222978	rs3790365	0.003253
11	PDDC1	28	10000	767222	777487	9.56058	0.0223978	rs4963161	0.001988
11	SLC25A22	6	10000	790474	798269	7.59779	0.0223978	rs111277421	0.005844
14	RGS6	2124	10000	72398816	73033238	16.6403	0.0223978	rs4902980	4.518e-05
19	RSPH6A	56	10000	46298967	46318605	10.3827	0.0223978	rs112400363	0.001272
1	PBX1	581	10000	164528596	164821060	14.8116	0.0223978	rs12081132	0.0001188
6	SIM1	135	10000	100836749	100911551	11.4671	0.0223978	rs3798515	0.0007084
16	ITFG1	145	10000	47189297	47495015	10.4903	0.0224978	rs11863453	0.0012
1	SPATA21	91	10000	16725137	16763919	11.1602	0.0224978	rs140673580	0.0008357
2	LOC284950	45	10000	86042252	86053911	9.79907	0.0224978	rs72842027	0.001746
5	DCP2	97	10000	112312406	112357892	11.2317	0.0224978	rs4705530	0.0008041
12	ZNF268	69	10000	133757994	133783697	9.47228	0.0225977	rs11147296	0.002086
1	RIIAD1	15	10000	151694012	151702082	8.82704	0.0225977	rs6587615	0.002968
3	LOC101928790	43	10000	179615981	179639687	9.42969	0.0225977	rs34508522	0.002135
12	USP30-AS1	4	10000	109489845	109491770	6.09064	0.0226977	rs12426673	0.01359
15	DENND4A	214	10000	65952956	66084631	10.8589	0.0226977	rs17810074	0.0009832
1	C1orf112	194	10000	169764549	169822229	10.739	0.0226977	rs10489176	0.001049
2	INO80D	176	10000	206858444	206950906	11.6699	0.0226977	rs7565764	0.0006352
5	ELL2	141	10000	95220801	95297775	10.4857	0.0226977	rs76469191	0.001203
6	MTCH1	77	10000	36935910	36954327	10.5198	0.0226977	rs3822972	0.001181
8	GNRH1	5	10000	25276773	25282556	7.83374	0.0226977	rs6185	0.005128
1	PEX19	5	10000	160246598	160254941	7.86145	0.0227977	rs41265791	0.00505
22	MIAT	74	10000	27053445	27072440	10.811	0.0227977	rs6519660	0.001009
2	MBD5	907	10000	148778579	149271044	14.409	0.0227977	rs10928377	0.0001471
15	SPTBN5	139	10000	42140343	42186275	12.1261	0.0229977	rs56198158	0.0004972
2	ATL2	147	10000	38522028	38604432	11.4444	0.0229977	rs6987	0.0007171
6	LINC01108	9	10000	14280357	14285685	8.69377	0.0229977	rs57903468	0.003193
8	RRS1	3	10000	67341262	67342968	6.49464	0.0229977	rs3739337	0.01082
9	DMRT3	43	10000	976967	991732	9.46088	0.0229977	rs7021244	0.002099
10	PPRC1	17	10000	103892750	103910090	9.29484	0.0230977	rs4919611	0.002298
17	MPO	13	10000	56347216	56358296	9.31086	0.0230977	rs2071409	0.002278
3	HYAL1	13	10000	50337319	50349812	8.6972	0.0230977	rs140499428	0.003187
10	GPR158	1504	10000	25464289	25891157	15.401	0.0231977	rs4749018	8.694e-05
20	SALL4	69	10000	50400582	50419048	10.3871	0.0231977	rs13044034	0.001269
3	DCLK3	49	10000	36753912	36781352	10.4598	0.0231977	rs55888784	0.00122
4	LRIT3	47	10000	110769339	110793471	9.58756	0.0231977	rs56005838	0.001959
10	CUEDC2	12	10000	104183001	104192423	8.25187	0.0233977	rs1044476	0.004071
16	DNAJA2	7	10000	46989273	47007625	7.29596	0.0233977	rs12719758	0.006911
19	CPAMD8	311	10000	17003761	17137625	13.5123	0.0233977	rs4808061	0.000237
1	ACP6	60	10000	147119167	147142634	10.0798	0.0233977	rs12025871	0.001499
1	ZMYM1	53	10000	35525386	35581459	8.94651	0.0233977	rs149319988	0.00278
2	IMP4	4	10000	131100488	131104197	6.8262	0.0233977	rs11542414	0.008983
8	LINC00599	6	10000	9757573	9760839	7.37981	0.0233977	rs2272026	0.006596
20	CST7	54	10000	24929865	24940564	8.92042	0.0234977	rs79484729	0.00282
1	SERTAD4-AS1	3	10000	210404803	210407466	6.25276	0.0235976	rs2473814	0.0124
2	PREB	6	10000	27353624	27357542	7.71216	0.0235976	rs2289359	0.005485
16	CLEC16A	622	10000	11038344	11276046	13.5613	0.0236976	rs12925631	0.0002309
1	VAV3	1147	10000	108113781	108507545	15.1394	0.0236976	rs12752530	9.986e-05
20	TTI1	49	10000	36611422	36661833	9.90869	0.0236976	rs6013651	0.001645
11	CATSPER1	21	10000	65784222	65793988	9.16714	0.0237976	rs2845570	0.002464
1	CAMSAP2	215	10000	200708685	200829831	11.6063	0.0237976	rs114130390	0.0006573
2	WDR35	174	10000	20110028	20189884	10.8326	0.0237976	rs13406648	0.0009973
7	SUMF2	41	10000	56131916	56148365	9.92555	0.0237976	rs13247558	0.00163
9	C9orf47	11	10000	91605777	91611057	8.87438	0.0237976	rs62551536	0.002892
14	LINC00341	8	10000	95873603	95876427	8.06333	0.0238976	rs1599965	0.004517
2	ACVR2A	82	10000	148602085	148688396	10.0872	0.0238976	rs13430086	0.001493
6	CCHCR1	146	10000	31110215	31126015	11.7	0.0238976	rs114792155	0.000625
19	KLK10	48	10000	51515999	51523431	9.59225	0.0239976	rs78117875	0.001954
22	DUSP18	22	10000	31058038	31063872	10.1992	0.0239976	rs145308917	0.001405
9	SPTAN1	61	10000	131314836	131395944	8.07581	0.0239976	rs11790032	0.004486
1	KIF1B	489	10000	10270763	10441661	11.8968	0.0240976	rs3748578	0.0005623
3	NBEAL2	37	10000	47021172	47051194	8.93734	0.0240976	rs13081418	0.002794
4	NPFFR2	256	10000	72897520	73013918	10.6954	0.0240976	rs10012800	0.001074
8	FAM183CP	80	10000	29779028	29811123	10.0005	0.0240976	rs6994901	0.001565
8	MFHAS1	446	10000	8641998	8751131	13.4302	0.0240976	rs11249891	0.0002476
10	IDI2-AS1	57	10000	1068576	1090141	9.58756	0.0241976	rs12768746	0.001959
16	NETO2	33	10000	47115430	47177936	8.40495	0.0241976	rs3095622	0.003742
17	LINC00324	7	10000	8123947	8127361	7.51521	0.0241976	rs77224069	0.006118
4	FRG1	15	10000	190861973	190884359	6.75663	0.0241976	rs1138726	0.00934
15	CEP152	110	10000	49030134	49103343	11.0296	0.0242976	rs966251	0.0008967
17	MPP3	39	10000	41878166	41910547	9.8288	0.0242976	rs117930744	0.001718
16	MT1JP	9	10000	56669650	56670998	7.84967	0.0243976	rs7201401	0.005083
16	NDRG4	92	10000	58497548	58547523	11.7529	0.0243976	rs867583	0.0006075
20	PRPF6	72	10000	62612430	62664453	9.49618	0.0243976	rs2427587	0.002059
4	RRH	39	10000	110749149	110765861	8.44474	0.0243976	rs13128244	0.003661
8	CHMP4C	62	10000	82644687	82671748	10.5982	0.0243976	rs17706460	0.001132
12	SELPLG	28	10000	109015679	109027670	10.3958	0.0245975	rs3782522	0.001263
12	TAS2R50	3	10000	11138511	11139511	6.94956	0.0245975	rs1376251	0.008384
15	AP4E1	220	10000	51200868	51298097	11.3216	0.0245975	rs118111761	0.0007661
8	NAT2	44	10000	18248754	18258723	10.0433	0.0246975	rs6984200	0.001529
10	FOXI2	6	10000	129535537	129539450	5.65456	0.0247975	rs7075733	0.01741
11	PC	179	10000	66615996	66725847	11.669	0.0247975	rs56803995	0.0006355
17	YWHAE	185	10000	1247833	1303556	11.4842	0.0247975	rs74969261	0.0007019
20	EDN3	20	10000	57875498	57901047	8.95112	0.0247975	rs6070768	0.002773
22	ENTHD1	152	10000	40139048	40289794	11.0807	0.0247975	rs117519595	0.0008723
3	GNAT1	3	10000	50229042	50235129	5.83505	0.0247975	rs34877766	0.01571
3	PLCH1	629	10000	155197670	155421997	12.9315	0.0247975	rs9814642	0.0003231
3	TDGF1	38	10000	46616044	46623952	9.08298	0.0247975	rs79553417	0.00258
5	LOC101928569	56	10000	57403458	57418168	9.50243	0.0247975	rs11743580	0.002052
6	C6orf1	7	10000	34214156	34216885	7.99603	0.0247975	rs77988055	0.004688
7	SLC26A4-AS1	14	10000	107296960	107302243	7.12374	0.0248975	rs2701684	0.007607
7	TRA2A	42	10000	23544400	23571660	10.219	0.0248975	rs78380988	0.00139
11	SIAE	38	10000	124505684	124546199	8.28472	0.0249975	rs1942662	0.003998
14	SERPINA1	59	10000	94843083	94857029	10.9505	0.0249975	rs11628917	0.0009358
17	CCDC42	50	10000	8633245	8648154	9.64856	0.0250975	rs112414721	0.001895
17	PHF23	3	10000	7138346	7142825	6.54634	0.0250975	rs77234976	0.01051
1	LOC100131564	76	10000	93775665	93811368	9.7339	0.0250975	rs4847239	0.001809
2	SGPP2	274	10000	223289321	223423617	12.9542	0.0250975	rs6751616	0.0003192
5	FOXD1	2	10000	72742084	72744352	6.18414	0.0250975	rs2972191	0.01289
13	SMAD9	141	10000	37418967	37494409	11.1602	0.0251975	rs9576135	0.0008357
2	TEX37	11	10000	88824168	88829103	7.5512	0.0251975	rs62159806	0.005997
11	C11orf42	5	10000	6226797	6232365	7.43464	0.0252975	rs10742968	0.006398
1	SRM	8	10000	11114648	11120091	7.522	0.0252975	rs13616	0.006095
1	C1orf35	3	10000	228288427	228291022	6.87766	0.0253975	rs2295995	0.008728
12	KCTD10	118	10000	109886459	109915155	10.2784	0.0254975	rs61941583	0.001346
14	PPM1A	81	10000	60712469	60765805	9.61971	0.0254975	rs60610663	0.001925
1	MGC27382	421	10000	78695282	78835147	13.0766	0.0254975	rs12142416	0.000299
5	PDGFRB	111	10000	149493401	149535422	11.8301	0.0254975	rs12515782	0.0005828
7	HIPK2	324	10000	139246315	139477693	12.6993	0.0254975	rs28469460	0.0003658
10	DDIT4	2	10000	74033676	74035797	5.07953	0.0255974	rs8316	0.02421
14	PGF	13	10000	75408532	75422467	8.65257	0.0255974	rs759059	0.003266
3	TF	106	10000	133464976	133497850	11.1216	0.0255974	rs181412842	0.0008533
17	COPZ2	21	10000	46103532	46115168	8.60197	0.0256974	rs8078698	0.003358
19	PAK4	107	10000	39616419	39670046	10.7945	0.0256974	rs35857821	0.001018
1	SPRR4	3	10000	152943127	152945069	5.83057	0.0256974	rs3170863	0.01575
6	TMEM181	296	10000	158957467	159056467	12.6114	0.0256974	rs4709237	0.0003834
11	OR4X1	4	10000	48285412	48286330	6.59788	0.0257974	rs10838852	0.01021
13	ITGBL1	740	10000	102104943	102373207	14.6045	0.0257974	rs3899633	0.0001326
5	UBE2QL1	153	10000	6448735	6496834	12.1397	0.0257974	rs114385280	0.0004936
10	MMP21	7	10000	127455026	127464390	7.91894	0.0258974	rs12775804	0.004892
15	SNX22	6	10000	64443915	64449680	7.69415	0.0258974	rs145215991	0.00554
20	GMEB2	129	10000	62218954	62258381	10.1221	0.0258974	rs6011924	0.001465
21	GRIK1	1091	10000	30909253	31312282	14.4941	0.0258974	rs3015828	0.0001406
22	ASCC2	126	10000	30184596	30234293	10.7197	0.0258974	rs60665668	0.00106
8	ERICH1-AS1	1452	10000	687604	1087777	16.3036	0.0258974	rs71516154	5.396e-05
17	RNF167	9	10000	4843629	4848517	7.9914	0.0259974	rs11871232	0.0047
11	C11orf80	69	10000	66512206	66610987	10.92	0.0260974	rs80323225	0.0009513
11	MCAM	7	10000	119179233	119187840	8.14332	0.0260974	rs6589734	0.004322
19	TMED1	4	10000	10942742	10946983	7.13532	0.0260974	rs59746253	0.007558
1	CACNA1S	237	10000	201008639	201081694	13.5362	0.0260974	rs1325313	0.000234
7	ZNF862	42	10000	149535508	149564568	9.56798	0.0260974	rs6974897	0.00198
14	LOC101927062	76	10000	27244700	27291326	10.5949	0.0261974	rs79552719	0.001134
16	TXNL4B	35	10000	72118755	72128215	8.92431	0.0261974	rs10492813	0.002814
1	SLC6A9	55	10000	44462154	44497164	10.2838	0.0261974	rs113551349	0.001342
7	KLHDC10	151	10000	129710348	129775560	11.384	0.0262974	rs6467282	0.0007408
20	CTCFL	91	10000	56071020	56100708	11.6878	0.0263974	rs56384690	0.0006291
5	HAND1	9	10000	153854531	153857824	8.74413	0.0263974	rs924581	0.003106
7	HOXA11-AS	4	10000	27225026	27228912	7.36894	0.0263974	rs17427875	0.006636
17	GJC1	46	10000	42875815	42908179	9.43572	0.0264974	rs1231641	0.002128
1	OSBPL9	91	10000	52082545	52254891	10.1297	0.0264974	rs12736315	0.001459
12	NACA	20	10000	57106210	57119326	8.49614	0.0265973	rs2926743	0.003559
19	CALM3	15	10000	47104511	47114039	8.84993	0.0265973	rs10113	0.002931
5	PCDHB2	7	10000	140474190	140476964	7.23113	0.0266973	rs145066448	0.007165
5	EPB41L4A-AS1	6	10000	111496222	111498198	6.89701	0.0267973	rs3816657	0.008634
11	OR8G5	7	10000	124134722	124135763	7.0393	0.0269973	rs2466701	0.007974
12	LOC101928420	22	10000	81156932	81164494	8.61339	0.0269973	rs12425895	0.003337
12	POU5F1P3	2	10000	8286364	8287448	4.88889	0.0269973	rs11043498	0.02703
19	ZNF404	11	10000	44376514	44384288	7.55753	0.0269973	rs171238	0.005976
19	ZNF699	15	10000	9405985	9415795	7.00307	0.0269973	rs10854142	0.008137
1	HNRNPR	28	10000	23636275	23670853	9.20542	0.0269973	rs1535179	0.002413
10	ZCCHC24	213	10000	81142082	81205383	12.1973	0.0270973	rs4979863	0.0004786
1	TFAP2E	11	10000	36038970	36060927	7.4991	0.0270973	rs12563326	0.006173
10	FAM24B	19	10000	124608609	124639157	9.5096	0.0271973	rs61872297	0.002044
11	OR8D2	2	10000	124189157	124190093	4.81886	0.0271973	rs2466620	0.02815
2	IL1F10	38	10000	113825546	113833427	9.91093	0.0271973	rs10165797	0.001643
10	REEP3	209	10000	65281122	65384883	10.9361	0.0272973	rs7075302	0.0009431
10	STAM-AS1	12	10000	17683282	17685917	8.77612	0.0272973	rs112589999	0.003052
11	C11orf16	33	10000	8941622	8954553	8.96235	0.0272973	rs79360333	0.002756
17	TBC1D3P5	49	10000	25745030	25758649	8.89853	0.0272973	rs149029874	0.002854
18	RAB12	82	10000	8609442	8639380	10.0218	0.0272973	rs138784383	0.001547
7	OGDH	180	10000	44646120	44748669	11.1936	0.0272973	rs757702	0.0008208
8	C8orf31	44	10000	144120678	144135720	7.64405	0.0272973	rs7006485	0.005696
19	SNRPD2	7	10000	46190711	46195443	7.29726	0.0273973	rs34078197	0.006906
1	VANGL2	49	10000	160370363	160398468	10.0182	0.0273973	rs115492172	0.00155
20	KIF3B	68	10000	30865453	30922811	9.11732	0.0273973	rs6141668	0.002532
9	KDM4C	1882	10000	6720862	7175648	15.8693	0.0273973	rs79628303	6.787e-05
11	MUC6	35	10000	1012823	1036706	9.61876	0.0274973	rs76600772	0.001926
10	SVIL	1087	10000	29746276	30024730	14.9949	0.0275972	rs3004231	0.0001078
11	UBE4A	52	10000	118230295	118269926	9.63793	0.0275972	rs11216859	0.001906
12	LOC101927058	183	10000	43009304	43040300	10.6715	0.0275972	rs10748333	0.001088
14	PRMT5	12	10000	23389719	23398794	7.43718	0.0275972	rs8006409	0.006389
17	CCDC43	5	10000	42754804	42767165	6.86806	0.0275972	rs4793140	0.008775
19	CCDC106	11	10000	56158953	56164526	7.94127	0.0275972	rs11670173	0.004832
19	CCDC155	63	10000	49891474	49921256	8.70925	0.0275972	rs11668208	0.003166
9	TRIM32	27	10000	119449580	119463579	8.72254	0.0275972	rs11793648	0.003143
12	ALKBH2	10	10000	109525992	109531293	7.78849	0.0276972	rs10775004	0.005258
16	LINC00922	712	10000	65318401	65610203	14.0789	0.0276972	rs1494756	0.0001753
17	GPRC5C	35	10000	72427666	72443568	10.0639	0.0276972	rs4351086	0.001512
3	GMNC	31	10000	190570525	190580465	8.8947	0.0276972	rs7340660	0.00286
4	POU4F2	5	10000	147560044	147563623	6.77565	0.0276972	rs3827594	0.009241
9	ELAVL2	322	10000	23690102	23826063	12.7401	0.0276972	rs3829088	0.0003579
9	ODF2	47	10000	131217433	131263571	8.45821	0.0276972	rs143995258	0.003634
9	SYK	423	10000	93563961	93660842	13.3314	0.0276972	rs290208	0.000261
1	PTGS2	15	10000	186640943	186649559	8.71097	0.0277972	rs689470	0.003163
2	KHK	12	10000	27309610	27323619	6.45726	0.0277972	rs6742004	0.01105
9	SLC46A2	23	10000	115641199	115653193	9.18055	0.0277972	rs3802493	0.002446
20	TMEM189	34	10000	48740273	48770335	9.42027	0.0278972	rs78516455	0.002146
2	PARD3B	2262	10000	205410515	206484886	16.3672	0.0278972	rs112822178	5.218e-05
5	RAB24	5	10000	176728190	176730745	7.16548	0.0278972	rs80237806	0.007432
7	C7orf57	76	10000	48075107	48100894	9.86886	0.0278972	rs112084119	0.001681
9	ANP32B	33	10000	100745488	100778224	9.53947	0.0278972	rs148729492	0.002011
12	ZNF10	61	10000	133707213	133736049	8.77134	0.0279972	rs7294506	0.00306
19	KLK9	15	10000	51505768	51512890	8.27205	0.0279972	rs10404395	0.004026
6	PACRG-AS1	57	10000	163731016	163745505	10.1411	0.0279972	rs12197625	0.00145
8	LOC100128993	254	10000	19041185	19103032	13.1843	0.0279972	rs115662107	0.0002823
9	PRDM12	45	10000	133539980	133558384	10.0242	0.0279972	rs10751506	0.001545
1	CELA3B	93	10000	22303417	22315847	10.9111	0.0280972	rs6700770	0.0009559
10	RASGEF1A	219	10000	43689980	43762367	11.9238	0.0281972	rs74995870	0.0005542
17	C17orf105	13	10000	41857802	41862054	7.62264	0.0281972	rs57227660	0.005764
20	LOC149950	45	10000	31175280	31196694	9.75537	0.0281972	rs56827178	0.001788
21	LINC00649	101	10000	35303515	35343487	10.5466	0.0281972	rs139225221	0.001164
2	ALLC	175	10000	3705785	3750260	11.5671	0.0281972	rs6754703	0.0006713
17	MPDU1	7	10000	7486964	7491527	8.04657	0.0282972	rs72827584	0.004559
17	PEMT	208	10000	17408876	17495017	11.4131	0.0282972	rs897456	0.0007293
1	RHOU	188	10000	228780393	228882416	11.6831	0.0282972	rs61825705	0.0006307
11	KCNQ1	895	10000	2466220	2870340	15.4591	0.0283972	rs2283177	8.431e-05
12	VPS33A	51	10000	122716093	122751068	9.28451	0.0284972	rs61954364	0.002311
15	SPRED1	319	10000	38545051	38649450	11.1846	0.0284972	rs10152231	0.0008248
16	PRSS22	11	10000	2902727	2908171	7.89871	0.0284972	rs12786	0.004947
17	PRR15L	18	10000	46029333	46035243	8.43533	0.0284972	rs3096	0.00368
19	AZU1	16	10000	827830	832017	8.24653	0.0284972	rs649411	0.004083
3	GOLIM4	186	10000	167727653	167813417	11.1527	0.0284972	rs4591536	0.0008391
5	THBS4	106	10000	79331169	79379107	10.5658	0.0284972	rs17879514	0.001152
19	SPACA6P	30	10000	52196592	52208443	9.14133	0.0285971	rs10408429	0.002499
1	SELENBP1	9	10000	151336777	151345210	8.00222	0.0285971	rs744459	0.004672
19	TNFSF14	21	10000	6663147	6670599	9.31973	0.0286971	rs2291668	0.002267
14	NOVA1	199	10000	26915088	27066960	10.1335	0.0287971	rs17583632	0.001456
19	EMR1	281	10000	6887559	6940464	11.7128	0.0287971	rs10402513	0.0006207
17	LINC00671	6	10000	41026690	41050751	7.65198	0.0288971	rs77386381	0.005671
22	MAPK12	38	10000	50691330	50700089	9.92104	0.0288971	rs2272857	0.001634
16	CYLD	73	10000	50775960	50835846	10.0373	0.0289971	rs7194167	0.001534
1	GUCA2B	7	10000	42619091	42621495	7.77583	0.0289971	rs80206942	0.005295
2	LOC102800315	27	10000	6766240	6774838	9.24608	0.0289971	rs6714052	0.00236
19	DNAJB1	11	10000	14625581	14629201	7.92079	0.0290971	rs74182230	0.004887
11	KCNQ1DN	6	10000	2891262	2893336	7.82319	0.0291971	rs2289488	0.005158
16	MT1M	8	10000	56666533	56667898	7.58151	0.0291971	rs1827210	0.005897
17	LRRC45	4	10000	79981279	79989027	6.62424	0.0291971	rs4072801	0.01006
1	ANKRD35	36	10000	145549208	145568526	9.13621	0.0291971	rs138990014	0.002506
2	PDE6D	96	10000	232597134	232646037	9.28055	0.0291971	rs62197241	0.002316
2	POLR1A	166	10000	86253450	86333278	10.7675	0.0291971	rs3770081	0.001033
19	SYMPK	178	10000	46318699	46366548	10.5245	0.0292971	rs112655992	0.001178
1	BCL9	185	10000	147013270	147098020	12.1825	0.0292971	rs61838402	0.0004824
6	TRIM39	16	10000	30294620	30311506	8.11957	0.0292971	rs115431024	0.004379
7	FAM221A	65	10000	23719748	23742269	9.44869	0.0292971	rs11763528	0.002113
13	ANKRD20A19P	220	10000	24481422	24523454	10.6345	0.0293971	rs74041458	0.00111
13	NBEA	1624	10000	35516423	36246874	14.7278	0.0293971	rs73167756	0.0001242
14	LOC101926933	61	10000	23398817	23423901	9.29166	0.0293971	rs2295687	0.002302
11	FGF3	41	10000	69624735	69634192	8.60305	0.0294971	rs11263589	0.003356
17	ZNF287	16	10000	16453630	16472520	7.23867	0.0294971	rs7217433	0.007135
9	C9orf57	21	10000	74666296	74675521	8.92886	0.0294971	rs10869089	0.002807
7	RFC2	21	10000	73645831	73668788	8.06454	0.029597	rs34200032	0.004514
7	RHBDD2	15	10000	75508316	75518244	8.55804	0.029597	rs7223	0.00344
17	SLC2A4	6	10000	7185053	7191367	7.03594	0.029697	rs5418	0.007989
5	ANKH	382	10000	14704908	14871887	13.0723	0.029697	rs174018	0.0002997
1	MRPL20	2	10000	1337275	1342693	4.71791	0.029797	rs112491004	0.02985
5	BOD1	31	10000	173034147	173043666	8.7058	0.029797	rs10866666	0.003172
7	ATG9B	19	10000	150709296	150721586	9.55229	0.029797	rs1835428	0.001997
16	MT1F	2	10000	56691854	56693215	5.90127	0.029897	rs2291956	0.01513
7	POP7	3	10000	100303675	100305123	4.74638	0.029897	rs112721366	0.02936
12	SLC6A13	117	10000	329786	372039	11.2899	0.029997	rs525631	0.0007793
17	FXR2	36	10000	7494547	7518215	9.80223	0.029997	rs112715785	0.001743
1	RGS18	26	10000	192127591	192154945	8.31912	0.029997	rs10754003	0.003923
7	TRIM24	164	10000	138145078	138270332	11.1929	0.029997	rs62485263	0.0008211
12	MYO1A	48	10000	57422300	57444549	9.35647	0.030097	rs138851352	0.002222
17	RFNG	14	10000	80005777	80009650	7.16041	0.030097	rs8069068	0.007453
2	PTMA	13	10000	232573234	232578250	8.20827	0.030097	rs2241742	0.00417
14	SEC23A	158	10000	39501122	39572437	11.0527	0.030197	rs34984050	0.0008856
1	PUM1	216	10000	31404352	31538564	11.1749	0.030197	rs139767195	0.0008291
1	SPATA6	282	10000	48761043	48937880	11.432	0.030197	rs6700461	0.0007219
2	KYNU	334	10000	143635194	143799885	11.7837	0.030197	rs6716587	0.0005975
3	OSBPL10	945	10000	31702316	32023342	14.8746	0.030197	rs62237308	0.0001149
6	HBS1L	186	10000	135281516	135376036	10.017	0.030197	rs7750574	0.001551
6	MUC22	305	10000	30973728	31003179	11.8672	0.030197	rs114840969	0.0005713
8	DLGAP2	861	10000	1449531	1656642	14.4517	0.030197	rs2404632	0.0001438
8	TOP1MT	146	10000	144391496	144442147	10.553	0.030197	rs2450749	0.00116
11	SENCR	10	10000	128561566	128565918	7.98679	0.030297	rs45525840	0.004712
20	LOC102606466	4	10000	12915525	12917611	6.75377	0.030297	rs34579138	0.009355
21	PAXBP1-AS1	19	10000	34100424	34115433	9.12022	0.030297	rs78789702	0.002528
4	TRIML2	78	10000	189012426	189026408	9.96205	0.030297	rs28615703	0.001598
12	ELK3	149	10000	96588206	96661606	12.1617	0.030397	rs77132416	0.0004878
1	TIMM17A	37	10000	201924618	201939789	9.12384	0.030397	rs79172735	0.002523
2	MFSD2B	28	10000	24232952	24247145	9.23988	0.030397	rs77959151	0.002368
5	ZNF366	151	10000	71739233	71803249	11.4366	0.030397	rs9293306	0.0007201
12	GPRC5D	24	10000	13093708	13103318	9.38977	0.030497	rs17212430	0.002182
14	TGFB3	40	10000	76424441	76448092	8.92561	0.030497	rs2268626	0.002812
19	SAFB	61	10000	5623045	5668489	9.48375	0.030497	rs10518245	0.002073
1	TMEM39B	29	10000	32538502	32568467	8.33914	0.030497	rs12409772	0.00388
6	IYD	220	10000	150690027	150725765	11.8417	0.030497	rs60702386	0.0005792
13	GTF2F2	225	10000	45694630	45858239	10.1992	0.0306969	rs146671677	0.001405
3	SSR3	45	10000	156257928	156272973	8.95046	0.0306969	rs79341213	0.002774
12	LOC374443	113	10000	9769879	9811010	10.0885	0.0307969	rs118016605	0.001492
17	HOXB-AS1	9	10000	46621712	46628603	7.9182	0.0307969	rs56128659	0.004894
2	LOC101927406	69	10000	195208992	195284355	9.13621	0.0307969	rs73046778	0.002506
3	COL7A1	21	10000	48601505	48632593	9.10868	0.0307969	rs1264194	0.002544
6	EXOC2	630	10000	485137	693141	13.7902	0.0307969	rs2073007	0.0002044
1	CLCA2	161	10000	86889768	86922240	11.016	0.0308969	rs145374623	0.0009033
2	HECW2	888	10000	197063976	197457335	13.9454	0.0308969	rs11692884	0.0001882
1	PIGR	34	10000	207101866	207119811	8.60088	0.0309969	rs115899229	0.00336
16	ABCC12	22	10000	48116883	48180681	8.61612	0.0310969	rs41280923	0.003332
17	LINC01180	7	10000	42723731	42727717	7.02789	0.0310969	rs62065976	0.008025
11	SLC35C1	27	10000	45825622	45834567	9.53764	0.0311969	rs3808976	0.002013
22	CHKB-AS1	55	10000	51021454	51033710	9.50511	0.0311969	rs6010016	0.002049
12	LIN7A	379	10000	81191170	81331694	11.9843	0.0312969	rs79208386	0.0005365
17	PEX12	7	10000	33901813	33905656	7.86718	0.0312969	rs321600	0.005034
5	TARS	73	10000	33440801	33468196	9.43917	0.0312969	rs7261	0.002124
12	PRH1	738	10000	11033559	11324222	10.9041	0.0313969	rs7957791	0.0009595
12	SPSB2	6	10000	6980099	6982521	7.07516	0.0313969	rs35535772	0.007816
17	VAMP2	5	10000	8062464	8066293	7.09591	0.0313969	rs1061032	0.007726
2	MXD1	41	10000	70142172	70170076	8.09164	0.0313969	rs6750488	0.004447
3	TNIK	910	10000	170780291	171178197	14.7309	0.0313969	rs7611574	0.000124
10	LOC399715	12	10000	6368506	6377943	8.07702	0.0314969	rs7096921	0.004483
19	CD37	8	10000	49838676	49843861	5.70673	0.0314969	rs354021	0.0169
1	CHRM3-AS2	21	10000	239870425	239882419	8.08513	0.0314969	rs7516378	0.004463
3	EIF4A2	10	10000	186501360	186507685	8.29657	0.0314969	rs57904146	0.003972
12	PRH1-PRR4	812	10000	10998447	11324224	10.9041	0.0315968	rs7957791	0.0009595
19	TEAD2	36	10000	49843852	49865714	8.53073	0.0315968	rs112770107	0.003492
2	CNRIP1	81	10000	68511302	68547183	10.6395	0.0315968	rs57021525	0.001107
19	MOB3A	27	10000	2071034	2096269	9.1843	0.0316968	rs12460442	0.002441
1	AKIRIN1	46	10000	39456915	39471737	9.1986	0.0316968	rs6694920	0.002422
9	DEC1	877	10000	117904096	118164923	14.0897	0.0316968	rs1335352	0.0001743
17	KCTD11	3	10000	7255207	7258262	6.44285	0.0317968	rs3809831	0.01114
11	CELF1	80	10000	47487488	47574792	10.4965	0.0318968	rs74445441	0.001196
8	PARP10	15	10000	145051319	145060635	7.02009	0.0318968	rs1134027	0.00806
10	TACC2	920	10000	123748688	124014060	15.1388	0.0319968	rs72840854	9.989e-05
10	TCTN3	62	10000	97423152	97453900	9.71873	0.0319968	rs41291572	0.001824
14	LOC100506700	21	10000	81908330	81916501	7.78678	0.0320968	rs7145713	0.005263
1	PALMD	118	10000	100111430	100160097	10.4447	0.0320968	rs3766580	0.00123
5	SLC36A3	116	10000	150655925	150683334	9.73187	0.0320968	rs10063518	0.001811
11	SCGB2A2	5	10000	62037626	62040629	7.05419	0.0322968	rs4963488	0.007908
15	FMN1_1	1766	10000	33057744	33486934	15.6315	0.0322968	rs139443078	7.696e-05
12	HSD17B6	25	10000	57157001	57181574	8.68522	0.0323968	rs10459247	0.003208
16	SOX8	22	10000	1031807	1036979	8.32794	0.0323968	rs11542179	0.003904
2	AHCTF1P1	6	10000	162355577	162364413	6.68587	0.0323968	rs12620974	0.009718
19	ZIK1	12	10000	58095627	58103758	7.41729	0.0324968	rs150043908	0.00646
2	ACYP2	542	10000	54342409	54532435	12.8801	0.0324968	rs843675	0.0003321
11	SC5D	20	10000	121163387	121184119	7.85466	0.0325967	rs74900182	0.005069
11	TH	17	10000	2185158	2193035	8.37939	0.0325967	rs11564713	0.003795
14	NIN	249	10000	51186480	51297839	12.6305	0.0325967	rs12885688	0.0003795
16	C16orf70	24	10000	67143914	67182442	8.09001	0.0325967	rs9033	0.004451
1	PPOX	7	10000	161136180	161141010	7.10312	0.0325967	rs36013429	0.007695
2	ITGAV	120	10000	187454789	187545629	10.6478	0.0325967	rs2682857	0.001102
12	TMEM194A	30	10000	57449425	57472574	9.09792	0.0326967	rs7135297	0.002559
20	LOC101926987	24	10000	35136104	35201678	9.19785	0.0326967	rs35036147	0.002423
2	SLC16A14	108	10000	230899689	230933715	10.6868	0.0326967	rs4973251	0.001079
17	UBE2G1	104	10000	4172511	4269969	9.15751	0.0327967	rs9889739	0.002477
22	USP18	62	10000	18632757	18660162	9.25152	0.0327967	rs62229505	0.002353
2	COPS7B	40	10000	232646380	232673964	8.22927	0.0327967	rs115821152	0.004122
3	PRKAR2A	42	10000	48788092	48885270	8.69948	0.0327967	rs7611628	0.003183
12	LOC101927592	344	10000	127399773	127544942	12.082	0.0328967	rs12296715	0.0005091
4	C4orf45	359	10000	159814683	159956333	11.8468	0.0328967	rs62337374	0.0005776
6	SLC17A3	79	10000	25845327	25874471	10.2363	0.0328967	rs146464750	0.001377
11	PHF21A	280	10000	45950869	46142985	11.4797	0.0329967	rs11600515	0.0007036
17	LOC100134391	133	10000	71733992	71752696	10.3228	0.0329967	rs77896001	0.001314
1	TMED5	45	10000	93615298	93646246	8.26126	0.0329967	rs546	0.00405
6	MRS2	102	10000	24403135	24426422	9.80013	0.0329967	rs7750377	0.001745
10	FAM178A	68	10000	102672325	102724891	9.5105	0.0330967	rs11190760	0.002043
10	TUBAL3	39	10000	5435060	5446793	8.04101	0.0330967	rs10795273	0.004573
16	CASC16	120	10000	52585998	52640887	9.25776	0.0330967	rs45453598	0.002345
2	RGPD4	18	10000	108443387	108509000	7.8176	0.0330967	rs7576738	0.005174
2	RNF103	45	10000	86830515	86851000	8.78992	0.0330967	rs13394423	0.003029
3	PLA1A	116	10000	119316694	119348658	10.4238	0.0330967	rs2280580	0.001244
5	ARRDC3	11	10000	90664540	90679149	7.69122	0.0330967	rs62376563	0.005549
12	ZBTB39	11	10000	57392616	57400297	7.93753	0.0331967	rs754398	0.004842
19	HSPBP1	31	10000	55773590	55791751	8.9597	0.0331967	rs67113555	0.00276
20	CABLES2	82	10000	60963685	60982339	9.19106	0.0331967	rs2427312	0.002432
3	XIRP1	14	10000	39224705	39234085	8.08067	0.0331967	rs112894855	0.004474
6	LINC01012	31	10000	27661813	27678001	9.2766	0.0331967	rs75693983	0.002321
15	EHD4	199	10000	42191638	42264755	11.6382	0.0333967	rs4923919	0.0006461
17	PNPO	18	10000	46018888	46026674	9.22832	0.0333967	rs11079803	0.002383
1	ALX3	16	10000	110602996	110613322	7.87583	0.0333967	rs481420	0.00501
2	KCNH7	693	10000	163227916	163695257	12.6911	0.0333967	rs2060448	0.0003674
8	NRG1-IT1	233	10000	31883251	31996993	11.6006	0.0333967	rs1481735	0.0006593
10	LIPF	35	10000	90424145	90438572	8.94061	0.0334967	rs814623	0.002789
15	SLC27A2	199	10000	50474392	50528589	11.6088	0.0334967	rs74014933	0.0006564
7	CCL24	18	10000	75441113	75443033	8.74296	0.0334967	rs11465303	0.003108
9	ANXA1	34	10000	75766780	75785307	9.28768	0.0334967	rs2795117	0.002307
12	ERP27	72	10000	15066975	15091463	8.69149	0.0335966	rs11612751	0.003197
1	UFC1	8	10000	161123533	161128646	7.19714	0.0335966	rs76617482	0.007302
8	UG0898H09	23	10000	63890419	63897460	8.07662	0.0335966	rs57802569	0.004484
10	PTEN	116	10000	89623194	89728532	10.922	0.0336966	rs17431184	0.0009503
14	SYT16	437	10000	62462540	62568427	13.3114	0.0336966	rs10143347	0.0002638
20	DLGAP4	164	10000	34894244	35157040	11.7134	0.0336966	rs6028949	0.0006205
9	UNQ6494	356	10000	92254697	92334674	12.1299	0.0336966	rs12555625	0.0004962
11	CD248	2	10000	66081957	66084515	4.88507	0.0337966	rs3741367	0.02709
1	LHX9	32	10000	197881634	197899273	8.35797	0.0337966	rs12029707	0.00384
1	PPP1R15B	5	10000	204372491	204380945	6.28593	0.0337966	rs56124156	0.01217
5	ADAM19	310	10000	156904311	157002831	12.1973	0.0337966	rs72811314	0.0004786
12	NEDD1	75	10000	97301000	97347469	9.46526	0.0338966	rs75453831	0.002094
20	GGTLC1	11	10000	23965689	23969416	8.03547	0.0338966	rs150377656	0.004587
2	SCLY	124	10000	238969564	239008054	9.95057	0.0338966	rs74001551	0.001608
4	ANTXR2	426	10000	80822770	80994626	11.2705	0.0338966	rs62298642	0.0007875
7	OR2F1	3	10000	143657019	143658108	5.88159	0.0338966	rs2072164	0.0153
11	TRIM6	93	10000	5617330	5634188	11.4527	0.0339966	rs146070868	0.0007139
15	NR2F2-AS1	106	10000	96809615	96870590	10.8752	0.0339966	rs3743466	0.0009746
3	PRR23A	2	10000	138722803	138725110	5.43297	0.0339966	rs1553877	0.01976
5	GMCL1P1	24	10000	177611510	177614433	8.02327	0.0339966	rs9286053	0.004618
6	DDR1	28	10000	30851860	30867933	8.55381	0.0339966	rs116750686	0.003448
15	TNFAIP8L3	100	10000	51348798	51397473	10.534	0.0340966	rs117781673	0.001172
4	PDLIM5	452	10000	95373007	95589378	12.0393	0.0340966	rs1493112	0.0005209
4	RBM47	464	10000	40425271	40631883	13.9058	0.0340966	rs3114382	0.0001922
12	HEBP1	61	10000	13127798	13153243	9.87543	0.0341966	rs850946	0.001675
4	LOC101927186	191	10000	62937472	63027483	11.608	0.0341966	rs10009359	0.0006567
18	PIGN	508	10000	59711457	59854289	11.7565	0.0342966	rs1025423	0.0006063
6	SPATS1	59	10000	44310396	44344904	9.28055	0.0342966	rs79988153	0.002316
13	DIS3	42	10000	73329539	73356266	8.84061	0.0343966	rs142950839	0.002946
16	ZNF423	982	10000	49524514	49891830	15.0178	0.0343966	rs8063842	0.0001065
18	LOC645355	93	10000	5748817	5795900	11.1814	0.0343966	rs3764460	0.0008262
19	C5AR1	7	10000	47813103	47825327	6.89742	0.0343966	rs4577202	0.008632
5	FAM172A	524	10000	92953430	93447404	12.2362	0.0343966	rs115751571	0.0004687
10	ALDH18A1	175	10000	97365685	97416567	10.2797	0.0344966	rs17111041	0.001345
15	FSD2	99	10000	83424116	83474822	10.2593	0.0344966	rs11637448	0.00136
5	LOC100506548	2	10000	40825364	40829244	5.61179	0.0344966	rs389737	0.01784
5	UBLCP1	37	10000	158690088	158713048	8.68807	0.0345965	rs62378742	0.003203
8	NSMAF	145	10000	59496063	59572404	10.3973	0.0345965	rs117703176	0.001262
17	YBX2	13	10000	7191570	7197876	7.09475	0.0346965	rs1910323	0.007731
21	MAP3K7CL	284	10000	30449791	30548210	10.4357	0.0346965	rs3787660	0.001236
2	LRRFIP1	576	10000	238536223	238690290	12.4594	0.0346965	rs10177762	0.0004159
8	LOC100130301	42	10000	74153658	74171737	8.62489	0.0346965	rs28848590	0.003316
11	SLC3A2	21	10000	62623483	62656355	8.48595	0.0347965	rs35657900	0.003579
12	IQCD	41	10000	113633245	113658899	8.08797	0.0348965	rs61943565	0.004456
14	NFKBIA	12	10000	35870715	35873960	8.09164	0.0348965	rs1957106	0.004447
17	COASY	4	10000	40714091	40718299	5.5052	0.0348965	rs668799	0.01896
6	NT5E	63	10000	86159301	86205509	9.68479	0.0348965	rs4593336	0.001858
7	ABCB8	46	10000	150725508	150744869	8.86055	0.0348965	rs6979693	0.002914
8	PUF60	18	10000	144898513	144911556	7.83374	0.0348965	rs6985555	0.005128
13	CDK8	284	10000	26828755	26978569	10.7819	0.0349965	rs34937489	0.001025
14	ATL1	148	10000	50999799	51099784	10.0421	0.0349965	rs117783723	0.00153
17	RABEP1	307	10000	5185557	5289659	11.7525	0.0349965	rs8703	0.0006076
10	NDUFB8	6	10000	102283485	102289680	5.81279	0.0350965	rs74210981	0.01591
13	SOX1	4	10000	112721912	112726020	6.63134	0.0350965	rs571564	0.01002
5	LINC01184	71	10000	127357243	127418766	10.2606	0.0350965	rs114537516	0.001359
8	SULF1	453	10000	70378858	70573147	13.2657	0.0350965	rs4737281	0.0002703
13	DZIP1	73	10000	96230455	96296960	10.1901	0.0351965	rs1197891	0.001412
3	TGFBR2	278	10000	30647993	30735633	12.841	0.0351965	rs9310940	0.0003391
13	NUDT15	20	10000	48611702	48621282	8.3368	0.0352965	rs74875668	0.003885
3	PFKFB4	32	10000	48555116	48594227	9.15013	0.0352965	rs2267846	0.002487
17	ATP1B2	13	10000	7554253	7561089	8.32608	0.0353965	rs1050533	0.003908
14	HIF1A-AS2	3	10000	62213756	62215807	5.99457	0.0355964	rs6573399	0.01435
17	CLDN7	4	10000	7163221	7166512	6.48481	0.0355964	rs222857	0.01088
14	TRAPPC6B	61	10000	39617014	39639634	8.86682	0.0356964	rs10483541	0.002904
3	RAD54L2	57	10000	51575595	51697612	9.26088	0.0356964	rs6445793	0.002341
21	C21orf49	55	10000	34144410	34170016	9.35564	0.0357964	rs111842929	0.002223
3	KLHL6	123	10000	183205318	183273499	10.3813	0.0357964	rs1553693	0.001273
5	GFPT2	230	10000	179727699	179780315	12.0953	0.0357964	rs7725605	0.0005055
11	WEE1	25	10000	9595227	9611313	8.72719	0.0358964	rs10840264	0.003135
12	LRTM2	31	10000	1929432	1945918	9.33352	0.0358964	rs11061994	0.00225
12	OR10AD1	9	10000	48596121	48597075	5.88044	0.0358964	rs75531856	0.01531
5	LOC102467216	84	10000	111992124	112018585	9.07378	0.0358964	rs17285400	0.002593
12	POLE	182	10000	133200347	133264110	9.58288	0.0359964	rs6560895	0.001964
19	ZFP14	80	10000	36825354	36870105	8.39333	0.0359964	rs8106095	0.003766
3	STT3B	151	10000	31574490	31677556	9.11372	0.0359964	rs147281541	0.002537
6	RXRB	12	10000	33161361	33168630	7.65708	0.0359964	rs5030979	0.005655
19	PRPF31	53	10000	54618789	54635150	9.64953	0.0360964	rs254276	0.001894
20	TASP1	523	10000	13370035	13619583	11.5939	0.0360964	rs6109854	0.0006617
10	PSTK	28	10000	124739555	124749907	8.47329	0.0361964	rs6599639	0.003604
11	ARHGAP32	408	10000	128834954	129062093	11.9272	0.0361964	rs79273071	0.0005532
10	PDE6C	170	10000	95372344	95425429	11.0343	0.0362964	rs12217346	0.0008944
13	BIVM-ERCC5	174	10000	103459495	103528351	11.0123	0.0362964	rs4150374	0.0009051
22	SGSM3	44	10000	40766594	40806293	8.57666	0.0362964	rs11704314	0.003405
11	PTPRJ	302	10000	48002109	48192394	11.3045	0.0363964	rs34972471	0.0007732
12	SPRYD3	26	10000	53458099	53473204	8.85617	0.0363964	rs7302636	0.002921
5	ZSWIM6	278	10000	60628099	60841999	11.3559	0.0363964	rs78948561	0.0007521
14	ANKRD9	7	10000	102973197	102976128	6.86094	0.0364964	rs3742445	0.00881
4	GALNTL6	2468	10000	172734574	173961558	15.2294	0.0364964	rs6825635	9.521e-05
16	PRSS53	9	10000	31094744	31100130	6.33917	0.0365963	rs11150606	0.01181
1	CTSS	44	10000	150702671	150738433	8.74707	0.0365963	rs3754212	0.003101
12	LOC400043	18	10000	54519854	54526626	7.24775	0.0366963	rs56242321	0.007099
20	LOC100287792	29	10000	36305311	36311636	7.81969	0.0366963	rs6020131	0.005168
4	NMU	126	10000	56461395	56502865	10.1071	0.0366963	rs35771241	0.001477
8	C8orf44	12	10000	67579786	67593377	7.30848	0.0367963	rs2976262	0.006863
9	COQ4	20	10000	131084790	131096351	7.83656	0.0367963	rs12345148	0.00512
12	NR2C1	111	10000	95414004	95467404	10.3185	0.0368963	rs35582	0.001317
13	ALG5	72	10000	37523907	37573504	8.89597	0.0368963	rs11620412	0.002858
17	XAF1	39	10000	6659155	6678964	9.09008	0.0368963	rs35682891	0.00257
1	ACAP3	4	10000	1227763	1243269	4.40185	0.0368963	rs115928552	0.0359
3	EFCAB12	48	10000	129120163	129147494	7.6018	0.0368963	rs4273365	0.005831
10	DLG5-AS1	4	10000	79686569	79689583	6.34067	0.0369963	rs1650146	0.0118
12	MRPL42	108	10000	93861265	93897548	9.31247	0.0369963	rs7967526	0.002276
17	DUSP3	30	10000	41843488	41856368	8.05214	0.0369963	rs1230397	0.004545
3	SLC9C1	641	10000	111859751	112013074	11.3038	0.0369963	rs4682369	0.0007735
7	PSPH	88	10000	56078743	56119268	9.75228	0.0369963	rs191374507	0.001791
11	NADSYN1	170	10000	71164216	71212581	9.31166	0.0370963	rs12807827	0.002277
9	SPATA31D1	7	10000	84603686	84610171	6.75548	0.0370963	rs113761190	0.009346
14	AP4S1	158	10000	31494311	31565656	11.3825	0.0371963	rs7150642	0.0007414
5	NR2F1-AS1	106	10000	92745061	92917026	9.57263	0.0371963	rs12652461	0.001975
12	C12orf60	44	10000	14956505	14976791	9.23679	0.0372963	rs71532848	0.002372
1	EIF2B3	305	10000	45316193	45452394	10.811	0.0372963	rs364482	0.001009
6	HUS1B	4	10000	655938	656964	6.3035	0.0372963	rs1211554	0.01205
6	TRIM40	62	10000	30103884	30116512	8.07783	0.0372963	rs116679269	0.004481
8	ADAM7	159	10000	24298508	24367077	10.5658	0.0372963	rs974696	0.001152
8	FGFR1	67	10000	38268655	38326352	10.0218	0.0372963	rs12114071	0.001547
15	LINC00928	49	10000	90048160	90067265	9.73086	0.0373963	rs185312251	0.001812
19	KLK15	11	10000	51328544	51334779	7.99642	0.0373963	rs3212810	0.004687
1	B4GALT3	7	10000	161141099	161147758	7.24068	0.0373963	rs3813619	0.007127
5	NNT	220	10000	43602790	43705668	10.0603	0.0373963	rs78997882	0.001515
5	SLC12A2	148	10000	127419482	127525380	10.6495	0.0373963	rs78797627	0.001101
6	SHPRH	104	10000	146205944	146285233	9.12094	0.0373963	rs2247571	0.002527
12	LRRC10	5	10000	70002344	70004942	7.26836	0.0374963	rs145823585	0.007018
13	VWA8	919	10000	42140960	42535221	13.228	0.0374963	rs1887745	0.0002758
17	PIK3R6	107	10000	8706040	8770994	10.9319	0.0374963	rs12951637	0.0009452
19	QPCTL	24	10000	46195740	46207248	8.98235	0.0374963	rs7256920	0.002726
1	LINC00853	2	10000	47644921	47646011	5.52655	0.0374963	rs2245116	0.01873
6	PSORS1C1	295	10000	31082607	31107869	12.2522	0.0374963	rs2072108	0.0004647
1	ACBD3	81	10000	226332379	226374423	9.57728	0.0375962	rs58416350	0.00197
22	KCNJ4	62	10000	38822332	38851205	9.66512	0.0375962	rs62228861	0.001878
14	ZFYVE1	234	10000	73436152	73493920	10.8165	0.0376962	rs997667	0.001006
17	RCVRN	41	10000	9801026	9808684	8.9857	0.0376962	rs77617442	0.002721
1	CENPF	193	10000	214776531	214837914	10.6047	0.0376962	rs3795522	0.001128
2	EMILIN1	4	10000	27301434	27309265	5.9425	0.0376962	rs2011616	0.01478
19	CDC37	17	10000	10501808	10514271	7.98256	0.0377962	rs2633973	0.004723
1	TMCC2	119	10000	205197037	205242471	9.72074	0.0377962	rs12119587	0.001822
1	MED8	2	10000	43849578	43855483	5.37392	0.0378962	rs12140829	0.02044
20	ASXL1	84	10000	30946146	31027122	8.70407	0.0378962	rs2377474	0.003175
20	NOL4L	180	10000	31030861	31172875	10.177	0.0378962	rs293566	0.001422
1	TMEM50A	12	10000	25664788	25688852	5.94012	0.0379962	rs9689	0.0148
7	PHKG1	42	10000	56147975	56160689	8.94192	0.0379962	rs13223519	0.002787
12	RARG	34	10000	53604349	53626040	9.44349	0.0380962	rs3741434	0.002119
22	CBX7	56	10000	39526778	39548538	7.56175	0.0380962	rs73884827	0.005962
15	TM6SF1	30	10000	83776323	83806111	8.82888	0.0381962	rs140917511	0.002965
7	KIAA1147	65	10000	141356527	141401953	8.95904	0.0381962	rs12674057	0.002761
8	BLK	254	10000	11351520	11422108	11.7897	0.0381962	rs1478890	0.0005956
10	C10orf131	97	10000	97667721	97698415	10.472	0.0382962	rs71482389	0.001212
11	TEX40	5	10000	64067862	64072239	6.03311	0.0382962	rs2286614	0.01404
13	FAM155A-IT1	147	10000	108439708	108487806	11.5698	0.0382962	rs3858805	0.0006703
13	MYO16	2118	10000	109248499	109860355	15.5742	0.0382962	rs4771601	7.933e-05
18	LOC400655	249	10000	70821292	70931733	11.6265	0.0382962	rs57548743	0.0006502
1	EXOC8	7	10000	231468481	231473578	6.17593	0.0382962	rs953	0.01295
10	STAM	302	10000	17686123	17758821	10.3354	0.0383962	rs116638061	0.001305
1	ZNF362	68	10000	33722173	33766320	9.17085	0.0383962	rs12041371	0.002459
2	FAM110C	12	10000	38813	46588	7.51551	0.0384962	rs62114730	0.006117
10	LRRC37A6P	15	10000	27534781	27541235	7.49472	0.0385961	rs7896532	0.006188
11	PICALM	307	10000	85668213	85780923	11.4504	0.0385961	rs79237445	0.0007148
17	FBXO39	52	10000	6679551	6690965	9.56706	0.0385961	rs34749260	0.001981
17	SLC16A6	55	10000	66263166	66287405	9.38977	0.0385961	rs73351335	0.002182
5	PPIP5K2	143	10000	102455957	102539224	9.20542	0.0386961	rs466325	0.002413
8	GLI4	30	10000	144349606	144359101	7.74841	0.0386961	rs2293924	0.005376
1	UBE2J2	33	10000	1189291	1209234	8.13203	0.0387961	rs41307035	0.004349
1	ZMYM6	71	10000	35451766	35497569	8.00843	0.0387961	rs75424261	0.004656
10	PRLHR	7	10000	120352915	120355160	6.98012	0.0388961	rs36054377	0.008242
11	CTR9	40	10000	10772810	10801290	9.20163	0.0388961	rs11042957	0.002418
1	GLIS1	505	10000	53971905	54199877	12.2051	0.0388961	rs57651758	0.0004766
1	PRKAA2	240	10000	57110989	57181008	10.1809	0.0388961	rs3738567	0.001419
11	POU2F3	182	10000	120107348	120190653	11.2522	0.0389961	rs116989966	0.0007953
17	JMJD6	17	10000	74708913	74722881	8.27838	0.0389961	rs1014390	0.004012
20	APMAP	78	10000	24943579	24973425	8.76242	0.0389961	rs6050218	0.003075
2	FZD7	7	10000	202899309	202903160	7.30273	0.0389961	rs4673222	0.006885
4	FAM53A	124	10000	1641607	1685988	9.9563	0.0389961	rs139146274	0.001603
6	PARK2	4663	10000	161768589	163148834	17.022	0.0389961	rs10945757	3.695e-05
1	RC3H1	86	10000	173900351	173962210	8.81051	0.0390961	rs78519408	0.002995
7	LOC101927446	19	10000	89964536	89973408	7.90311	0.0390961	rs42637	0.004935
7	MYO1G	35	10000	45002259	45018704	8.20088	0.0390961	rs3735485	0.004187
10	HIF1AN	36	10000	102295640	102313681	7.36813	0.0391961	rs11816840	0.006639
19	ZNF134	17	10000	58125829	58133636	7.21542	0.0391961	rs10403965	0.007228
9	LOC101448202	185	10000	137711260	137764464	11.8481	0.0391961	rs72776319	0.0005772
10	MICU1	308	10000	74127083	74385949	9.43917	0.0393961	rs12356915	0.002124
17	C1QTNF1	64	10000	77019015	77045870	8.90944	0.0393961	rs35035542	0.002837
1	FCRL6	48	10000	159770300	159786047	8.07339	0.0393961	rs4301626	0.004492
21	SYNJ1	119	10000	34001068	34100351	9.91317	0.0393961	rs147026419	0.001641
2	MOGAT1	115	10000	223536456	223574649	10.1667	0.0393961	rs35676483	0.00143
3	TRMT10C	11	10000	101280679	101285290	7.09684	0.0393961	rs13072301	0.007722
8	BAALC-AS1	54	10000	104169217	104184368	9.80646	0.0393961	rs7839419	0.001739
10	MIR1256_10	260	10000	74119697	74336541	9.43917	0.039596	rs12356915	0.002124
11	TMEM218	62	10000	124964265	124981659	9.99695	0.039596	rs4245061	0.001568
9	C9orf91	164	10000	117373705	117408703	10.4298	0.039596	rs79468361	0.00124
11	HINFP	29	10000	118992232	119005765	7.45672	0.039696	rs141270315	0.00632
3	FAM43A	10	10000	194406621	194409766	6.90199	0.039696	rs79296405	0.00861
4	MANBA	171	10000	103552642	103682151	10.3496	0.039696	rs12152655	0.001295
9	URM1	28	10000	131133597	131154295	7.21815	0.039696	rs12346596	0.007217
15	FMN1_2	136	10000	33441984	33486934	10.9622	0.039896	rs76540084	0.0009299
16	CORO1A	3	10000	30194730	30200397	5.55386	0.039896	rs35900366	0.01844
4	TNRC18P1	5	10000	141562344	141564234	6.94679	0.039896	rs12642653	0.008397
5	LOC100505878	8	10000	86042634	86045589	6.88196	0.039896	rs1363339	0.008707
21	PAXBP1	42	10000	34106209	34144169	9.12022	0.039996	rs78789702	0.002528
10	FAM24B-CUZD1	33	10000	124591670	124639157	9.5096	0.040096	rs61872297	0.002044
16	LOC100129697	10	10000	89006446	89017932	6.72839	0.040096	rs9922120	0.009489
20	RPRD1B	94	10000	36661947	36720766	9.09721	0.040196	rs6068632	0.00256
3	RTP3	9	10000	46539484	46542439	6.24848	0.040196	rs7430431	0.01243
9	NTRK2	851	10000	87283372	87641985	13.6521	0.040196	rs55977431	0.00022
15	LOC253044	8	10000	77934105	77941581	7.34098	0.040296	rs118095146	0.00674
16	SLC38A7	64	10000	58700297	58718674	9.09721	0.040296	rs12448028	0.00256
13	LATS2	234	10000	21547175	21635722	10.5027	0.040396	rs117749733	0.001192
15	MEF2A	213	10000	100106132	100256629	10.7425	0.040396	rs325380	0.001047
8	TIGD5	5	10000	144680073	144682485	7.00836	0.040396	rs58573550	0.008113
11	PTPRCAP	2	10000	67202980	67205153	5.0455	0.040496	rs12787021	0.02469
13	MED4-AS1	11	10000	48651272	48654129	7.2635	0.040496	rs117871044	0.007037
14	ZC3H14	74	10000	89029252	89079853	9.93802	0.040496	rs76127010	0.001619
19	PLIN3	108	10000	4838345	4867780	10.59	0.040496	rs1055919	0.001137
2	TMEM214	5	10000	27255773	27264565	5.69431	0.040496	rs13021112	0.01702
9	SPATA31D5P	5	10000	84528351	84534842	6.1732	0.040496	rs1999662	0.01297
17	AURKB	13	10000	8108048	8113944	7.87872	0.0405959	rs1059476	0.005002
3	GNAI2	22	10000	50264119	50296786	8.06695	0.0405959	rs10510755	0.004508
4	SHROOM3	935	10000	77356252	77704405	13.69	0.0405959	rs10017318	0.0002156
8	IMPA1	72	10000	82569150	82598589	9.60262	0.0405959	rs117790335	0.001943
11	TRIM5	123	10000	5684424	5706339	10.2297	0.0406959	rs11601507	0.001382
1	MCOLN2	226	10000	85391265	85462796	10.475	0.0407959	rs76624861	0.00121
8	DMTN	98	10000	21911080	21940036	9.31973	0.0407959	rs9657287	0.002267
8	FGF17	13	10000	21900427	21906319	8.28336	0.0407959	rs3176297	0.004001
12	ZNF140	7	10000	133657036	133684258	5.90243	0.0408959	rs188993048	0.01512
3	KCNAB1	941	10000	155838336	156256927	13.3057	0.0408959	rs33959074	0.0002646
5	CCNH	18	10000	86690078	86708850	7.57693	0.0408959	rs2230641	0.005912
10	ENO4	32	10000	118609022	118642112	8.85992	0.0409959	rs9421250	0.002915
10	IDI2	28	10000	1064846	1071799	8.29566	0.0409959	rs3750729	0.003974
1	PEA15	4	10000	160175124	160185162	6.15691	0.0409959	rs114296300	0.01309
1	TYW3	110	10000	75198835	75232360	9.23525	0.0409959	rs72677727	0.002374
8	DEFA5	6	10000	6912828	6914259	6.67727	0.0409959	rs2272719	0.009765
11	MEN1	7	10000	64570985	64578766	5.86214	0.0410959	rs679946	0.01547
19	LENG9	3	10000	54972978	54974894	5.43121	0.0410959	rs10423424	0.01978
8	DOCK5	504	10000	25042286	25270619	12.3699	0.0410959	rs4872310	0.0004363
9	MIRLET7DHG	56	10000	96938851	96966848	8.91589	0.0410959	rs10993093	0.002827
15	MAP2K5	511	10000	67835020	68099455	11.4834	0.0411959	rs3784688	0.0007022
5	PAM	218	10000	102201526	102366808	10.0325	0.0411959	rs1650501	0.001538
10	USP54	56	10000	75257295	75335433	7.31977	0.0412959	rs61548896	0.00682
19	SAMD4B	96	10000	39833107	39875537	8.72312	0.0412959	rs146134490	0.003142
1	VAMP3	34	10000	7831328	7841492	9.3173	0.0412959	rs1776352	0.00227
2	ATRAID	10	10000	27434898	27440046	6.40343	0.0412959	rs4617	0.01139
10	LINC00703	60	10000	4426437	4452804	9.66414	0.0413959	rs10508282	0.001879
20	LOC284788	43	10000	22380970	22401281	7.58304	0.0413959	rs4629222	0.005892
10	ITPRIP	50	10000	106069453	106098251	8.64589	0.0414959	rs147944114	0.003278
12	ZDHHC17	260	10000	77157853	77247474	10.5738	0.0414959	rs78920157	0.001147
15	FAM81A	228	10000	59730371	59815751	10.78	0.0414959	rs35195175	0.001026
17	TRPV1	141	10000	3468739	3512705	11.2424	0.0414959	rs112908146	0.0007995
19	OR10H4	4	10000	16059817	16060768	4.27927	0.0414959	rs16980994	0.03858
8	DEFB134	9	10000	11851488	11853760	6.99736	0.0414959	rs11250186	0.008163
1	IFFO2	127	10000	19230773	19282826	10.6146	0.0415958	rs17492693	0.001122
3	HCLS1	72	10000	121350244	121379795	8.6315	0.0415958	rs62268732	0.003304
12	NUDT4P1	54	10000	93771745	93796052	8.53595	0.0416958	rs11107004	0.003482
19	TPM3P9	98	10000	53935226	53947925	10.4268	0.0416958	rs73043387	0.001242
4	SLC10A7	486	10000	147175136	147443123	12.0744	0.0416958	rs12711436	0.0005112
17	GLP2R	184	10000	9729380	9793022	9.67394	0.0417958	rs62066044	0.001869
2	LOC101927661	73	10000	67440539	67471706	10.3639	0.0417958	rs76208056	0.001285
5	EPB41L4A	690	10000	111498314	111755010	13.0431	0.0417958	rs13358904	0.0003044
6	C6orf229	3	10000	24797548	24799124	6.13409	0.0417958	rs2251702	0.01326
11	TMEM9B-AS1	25	10000	8986221	8997830	7.89287	0.0418958	rs59454329	0.004963
7	ANKIB1	100	10000	91875547	92030698	8.84682	0.0418958	rs2888876	0.002936
8	MYBL1	52	10000	67474409	67525480	7.99719	0.0418958	rs117045962	0.004685
1	LOC100505768	53	10000	87819209	87837338	9.63793	0.0419958	rs10873834	0.001906
2	REEP1	376	10000	86441119	86565206	10.475	0.0419958	rs2276625	0.00121
2	SLC9A4	242	10000	103089761	103150431	10.523	0.0419958	rs35181686	0.001179
2	TEX41	626	10000	145425533	145834291	12.5968	0.0419958	rs1830319	0.0003864
3	LMCD1	225	10000	8543492	8609811	11.0888	0.0419958	rs17049255	0.0008685
6	DKFZp451B082	53	10000	163759373	163768065	9.23448	0.0419958	rs4370339	0.002375
6	CD109	365	10000	74405807	74538041	11.3908	0.0420958	rs6907989	0.0007381
4	CFI	161	10000	110661847	110723335	10.0934	0.0422958	rs28762207	0.001488
11	NPAS4	4	10000	66188474	66194177	5.52189	0.0423958	rs77600363	0.01878
7	HNRNPA2B1	17	10000	26229555	26240413	7.55843	0.0423958	rs10261965	0.005973
9	ATP6V1G1	23	10000	117349993	117361152	8.51619	0.0423958	rs149791957	0.00352
14	DHRS7	58	10000	60611499	60632211	7.71183	0.0424958	rs380342	0.005486
6	LOC101928491	23	10000	17501595	17511496	7.90751	0.0424958	rs2328107	0.004923
13	METTL21C	47	10000	103338096	103346871	10.1146	0.0425957	rs7990562	0.001471
14	AJUBA_2	4	10000	23447820	23451851	5.92825	0.0425957	rs8009811	0.0149
22	RTCB	88	10000	32783561	32808274	9.27897	0.0425957	rs5754069	0.002318
2	ASB1	95	10000	239335625	239360891	8.90687	0.0425957	rs1044561	0.002841
6	TREML2	48	10000	41157486	41168925	9.27739	0.0425957	rs34346157	0.00232
12	FBRSL1	344	10000	133067156	133161773	11.5569	0.0426957	rs10870471	0.000675
17	GPS1	7	10000	80009762	80015346	5.85759	0.0426957	rs7212485	0.01551
20	CSRP2BP	141	10000	18122867	18169031	10.9193	0.0426957	rs1205210	0.0009517
13	UCHL3	148	10000	76123615	76180156	9.56706	0.0427957	rs9543976	0.001981
19	SBK3	9	10000	56052022	56056909	7.3638	0.0427957	rs74881819	0.006655
3	LINC00888	23	10000	183165395	183173800	7.17856	0.0427957	rs10845	0.007378
3	NFKBIZ	30	10000	101546833	101579869	9.30203	0.0428957	rs9841857	0.002289
3	RFC4	28	10000	186507681	186524484	8.38563	0.0428957	rs1047148	0.003782
12	SMCO3	22	10000	14957583	14967116	8.20566	0.0429957	rs71532844	0.004176
1	CAPZA1	53	10000	113162074	113214241	8.64645	0.0429957	rs12025785	0.003277
11	INCENP	121	10000	61891444	61920635	9.48286	0.0430957	rs117392689	0.002074
17	TTC19	64	10000	15902693	15932723	7.4448	0.0430957	rs2301652	0.006362
4	LINC01093	6	10000	185814153	185820615	6.92961	0.0430957	rs68186293	0.008478
6	LOC101927950	70	10000	5665219	5695505	9.06604	0.0430957	rs10484317	0.002604
9	ENTPD2	12	10000	139942550	139948503	7.05737	0.0430957	rs7861020	0.007894
11	GSTP1	11	10000	67351065	67354124	7.17394	0.0431957	rs4147581	0.007397
6	VIP	11	10000	153071931	153080902	7.27451	0.0431957	rs3823082	0.006994
11	LOC100130987	74	10000	67085309	67159158	9.37221	0.0432957	rs72932730	0.002203
14	SPATA7	51	10000	88851987	88904804	8.8518	0.0432957	rs79584445	0.002928
15	LDHAL6B	14	10000	59499014	59500785	6.98382	0.0432957	rs3809530	0.008225
16	LOC101928446	374	10000	82806923	82863243	12.7643	0.0432957	rs56277310	0.0003533
4	GAB1	210	10000	144257982	144395718	10.6096	0.0432957	rs300916	0.001125
6	NUP43	27	10000	150045451	150067708	6.01684	0.0432957	rs12212415	0.01417
12	WIBG	21	10000	56295196	56321697	6.74464	0.0433957	rs12827688	0.009403
1	OSCP1	124	10000	36883506	36916086	8.65648	0.0433957	rs16822958	0.003259
9	PHYHD1	35	10000	131683173	131704320	7.51551	0.0434957	rs78928678	0.006117
5	SH3PXD2B	396	10000	171760502	171881527	11.0084	0.0435956	rs111330621	0.000907
7	CCT6A	26	10000	56119377	56131682	8.20827	0.0435956	rs12555	0.00417
11	C11orf68	3	10000	65684282	65686531	4.04509	0.0436956	rs7947504	0.0443
12	MYO1H	280	10000	109826523	109886176	10.6096	0.0436956	rs3825393	0.001125
17	EIF4A1	19	10000	7476023	7482324	8.07743	0.0436956	rs62059823	0.004482
19	MIR6796	2	10000	40875752	40875814	4.37079	0.0436956	rs3745198	0.03656
9	SH3GLB2	21	10000	131770071	131790632	7.99835	0.0436956	rs117277684	0.004682
6	SNX9	311	10000	158244202	158366109	11.2575	0.0437956	rs28575464	0.000793
17	SLC4A1	39	10000	42325757	42345502	9.34168	0.0438956	rs45445495	0.00224
10	NPM3	3	10000	103541081	103543170	5.07024	0.0439956	rs3816354	0.02434
15	SNURF	27	10000	25200069	25223729	7.51374	0.0439956	rs8027709	0.006123
10	VCL	136	10000	75757871	75879914	9.83524	0.0440956	rs2131959	0.001712
14	LINC00645	55	10000	28081793	28108842	8.98436	0.0440956	rs77103147	0.002723
19	PPP1R15A	20	10000	49375648	49379319	7.09197	0.0441956	rs610308	0.007743
1	LOC101928009	14	10000	153146993	153164152	6.24563	0.0441956	rs55964025	0.01245
13	IRS2	100	10000	110406183	110438914	10.1259	0.0442956	rs7999797	0.001462
1	FMO2	147	10000	171154387	171181822	9.20239	0.0442956	rs10912524	0.002417
3	PRRT3	4	10000	9987225	9994078	5.37819	0.0442956	rs55847233	0.02039
11	CHID1	78	10000	867858	915058	9.42198	0.0443956	rs7942362	0.002144
1	STRIP1	20	10000	110574198	110597263	8.23104	0.0444956	rs1965990	0.004118
3	SELT	50	10000	150321065	150348234	9.15603	0.0445955	rs6802114	0.002479
5	C5orf63	60	10000	126378249	126409184	7.22413	0.0445955	rs17165249	0.007193
19	ZFP30	38	10000	38123388	38146313	8.50743	0.0446955	rs149781827	0.003537
1	METTL11B	57	10000	170115187	170136923	8.67616	0.0446955	rs146675755	0.003224
8	ERICH1	361	10000	614199	681226	12.3044	0.0446955	rs3824148	0.0004519
19	FARSA	17	10000	13033283	13044558	7.51964	0.0447955	rs66630592	0.006103
2	CDC42EP3	95	10000	37869024	37899678	9.93234	0.0447955	rs12468059	0.001624
9	SNX30	334	10000	115513133	115637267	10.9384	0.0447955	rs4979149	0.0009419
10	ARHGAP12	195	10000	32094325	32217804	10.3326	0.0448955	rs75468282	0.001307
16	CLCN7	170	10000	1494933	1525085	10.7232	0.0448955	rs2745006	0.001058
16	LOC100506655	18	10000	25151891	25160353	5.97258	0.0450955	rs78078136	0.01453
1	KDM4A-AS1	3	10000	44165408	44173012	5.15048	0.0450955	rs56319043	0.02324
2	AMMECR1L	35	10000	128619206	128643514	8.49768	0.0450955	rs13423029	0.003556
2	C2orf43	278	10000	20883773	21022890	11.4519	0.0450955	rs4971546	0.0007142
2	SULT6B1	200	10000	37394962	37415690	10.0482	0.0450955	rs6710676	0.001525
15	USP50	143	10000	50792758	50838902	9.94371	0.0451955	rs62019154	0.001614
20	HELZ2	56	10000	62189438	62205592	9.28134	0.0451955	rs45463297	0.002315
22	SGSM1	469	10000	25202135	25322813	12.5757	0.0451955	rs9612790	0.0003908
2	C2orf83	172	10000	228474805	228498036	10.4842	0.0451955	rs2063850	0.001204
3	LINC00488	16	10000	108897011	108904108	7.5494	0.0451955	rs1183647	0.006003
5	PFDN1	78	10000	139624634	139682689	8.50846	0.0451955	rs10041530	0.003535
12	H3F3C	6	10000	31944118	31945175	7.01566	0.0452955	rs36058687	0.00808
22	CRELD2	81	10000	50312277	50321188	8.29155	0.0452955	rs74510325	0.003983
3	PHC3	103	10000	169805367	169899537	9.28451	0.0452955	rs79098732	0.002311
1	LMOD1	120	10000	201865583	201915716	10.6903	0.0453955	rs72744814	0.001077
2	PPP1R21	198	10000	48667907	48742531	11.0604	0.0453955	rs74372386	0.0008819
8	FAM167A	230	10000	11278972	11324276	11.1873	0.0453955	rs12156009	0.0008236
11	TMPRSS4	163	10000	117947726	117990556	10.4179	0.0454955	rs10750126	0.001248
13	KATNAL1	325	10000	30776766	30881624	11.5643	0.0454955	rs9550549	0.0006723
20	GHRH	2	10000	35879489	35885299	4.04967	0.0454955	rs116031038	0.04418
5	SRP19	95	10000	112196884	112228776	8.61121	0.0454955	rs34512377	0.003341
11	MRPL23	29	10000	1968501	1977839	8.80808	0.0455954	rs34134444	0.002999
16	LINC00917	106	10000	86365455	86379285	10.6212	0.0455954	rs13333446	0.001118
1	EXOSC10	92	10000	11126675	11159938	7.58121	0.0455954	rs12136825	0.005898
12	PIWIL1	102	10000	130822432	130856877	10.1071	0.0456954	rs74518629	0.001477
19	STXBP2	19	10000	7701986	7712760	6.89143	0.0456954	rs55954306	0.008661
10	ADAM12	1283	10000	127700953	128077127	14.5568	0.0457954	rs10901551	0.000136
11	SCN4B	46	10000	118004091	118023630	8.77731	0.0457954	rs1793137	0.00305
12	NUDT4P2	54	10000	93771701	93796045	8.53595	0.0457954	rs11107004	0.003482
3	ATG7	555	10000	11314009	11599139	11.9084	0.0457954	rs2122031	0.0005588
17	TNFSF13	4	10000	7461608	7464925	6.15961	0.0458954	rs11552708	0.01307
1	CKS1B	2	10000	154947117	154951725	5.13264	0.0458954	rs12087657	0.02348
11	CCDC81	160	10000	86085777	86134151	10.732	0.0459954	rs148290359	0.001053
14	GPHB5	29	10000	63779548	63785593	7.69415	0.0459954	rs77850489	0.00554
14	ZBTB1	73	10000	64971291	65000408	8.1039	0.0459954	rs12385910	0.004417
5	C5orf28	68	10000	43444353	43483992	8.41567	0.0459954	rs6884864	0.00372
5	RASA1	120	10000	86564069	86687743	9.61209	0.0459954	rs62368950	0.001933
6	DYNLT1	12	10000	159057506	159065818	7.23816	0.0459954	rs3799195	0.007137
12	DCTN2	22	10000	57923832	57941114	7.38446	0.0460954	rs7964074	0.006579
19	EMR4P	131	10000	6952510	6990857	9.82988	0.0461954	rs141607497	0.001717
19	ZNF549	7	10000	58038692	58052244	6.31235	0.0461954	rs2360751	0.01199
1	OR10J1	5	10000	159409511	159410600	6.61541	0.0461954	rs35634161	0.01011
7	NPTX2	13	10000	98246596	98259181	6.95362	0.0461954	rs705315	0.008365
9	INSL4	4	10000	5231418	5233967	4.26741	0.0461954	rs3780383	0.03885
15	C15orf32	81	10000	93014906	93044347	10.1209	0.0462954	rs8040009	0.001466
19	ZNF577	178	10000	52359055	52391229	9.1828	0.0463954	rs142109457	0.002443
1	PPCS	33	10000	42922011	42939049	7.3861	0.0463954	rs16829572	0.006573
12	LINC00940	21	10000	2038367	2045742	8.72893	0.0464954	rs2470407	0.003132
14	KLC1	133	10000	104095524	104167888	9.38725	0.0464954	rs861540	0.002185
1	B3GALT2	8	10000	193147859	193155743	6.09976	0.0464954	rs1539725	0.01352
3	PRRT3-AS1	8	10000	9989087	9996471	5.37819	0.0464954	rs55847233	0.02039
4	TACR3	338	10000	104510624	104640973	11.1109	0.0464954	rs74677393	0.0008582
11	FOLH1	162	10000	49168186	49230222	9.49262	0.0465953	rs202668	0.002063
11	PLCB3	25	10000	64018994	64036924	8.6315	0.0465953	rs589030	0.003304
16	RBL2	85	10000	53468350	53525560	7.65644	0.0465953	rs11642335	0.005657
1	TEX38	3	10000	47137496	47139256	5.16022	0.0465953	rs614486	0.02311
20	R3HDML	51	10000	42965797	42979432	8.00843	0.0466953	rs141954097	0.004656
5	CCNO	4	10000	54526980	54529508	5.77995	0.0466953	rs231622	0.01621
16	ZNF785	3	10000	30591993	30597092	5.74879	0.0467953	rs74249949	0.0165
3	CTDSPL	222	10000	37903668	38025960	10.6063	0.0467953	rs34054543	0.001127
5	SLCO4C1	216	10000	101569691	101632253	10.5835	0.0468953	rs10515323	0.001141
14	NKX2-1-AS1	9	10000	36988482	36992221	7.01854	0.0469953	rs144821377	0.008067
19	LOC100631378	51	10000	38314362	38345836	8.69149	0.0469953	rs138381411	0.003197
1	PANK4	30	10000	2439974	2458035	7.53446	0.0469953	rs1980789	0.006053
20	SPTLC3	720	10000	12989626	13147411	12.1675	0.0469953	rs2327750	0.0004863
3	TMA7	9	10000	48481685	48485537	5.38935	0.0469953	rs4858820	0.02026
7	MUC17	85	10000	100663363	100702140	9.68479	0.0469953	rs4729655	0.001858
7	ADCY1	376	10000	45613738	45762714	11.7599	0.0470953	rs4724425	0.0006052
8	CHCHD7	4	10000	57124314	57131176	6.27143	0.0470953	rs6474051	0.01227
10	JMJD1C	522	10000	64926980	65225761	11.0412	0.0471953	rs7895610	0.0008911
11	ALKBH3-AS1	27	10000	43930838	43942494	8.17935	0.0471953	rs10768995	0.004237
11	CWF19L2	413	10000	107197071	107328572	11.0882	0.0471953	rs35743606	0.0008688
3	ZBTB11-AS1	5	10000	101395273	101398057	5.04761	0.0471953	rs3806652	0.02466
13	EBPL	141	10000	50234811	50265623	9.86121	0.0472953	rs148461715	0.001688
19	DDA1	56	10000	17420336	17434106	9.19407	0.0472953	rs10423120	0.002428
7	ACTB	8	10000	5566778	5570232	6.62601	0.0472953	rs11546939	0.01005
7	SLC35B4	73	10000	133974089	134001827	7.83233	0.0472953	rs148035419	0.005132
12	PTGES3	42	10000	57057124	57082192	8.48189	0.0473953	rs2958153	0.003587
6	ENPP4	44	10000	46097700	46114436	7.61172	0.0473953	rs1048077	0.005799
8	DUSP26	14	10000	33448853	33457439	6.34821	0.0473953	rs150791479	0.01175
8	ERICH5	57	10000	99076749	99105838	9.84386	0.0473953	rs2444861	0.001704
8	PINX1	401	10000	10622470	10697409	10.6647	0.0473953	rs11250075	0.001092
19	ZNF321P	25	10000	53430387	53445847	7.1805	0.0474953	rs7250641	0.00737
2	SLC5A6	18	10000	27422454	27435175	6.52113	0.0474953	rs56970590	0.01066
11	MMP8	63	10000	102582525	102595685	9.08298	0.0475952	rs145609471	0.00258
17	ALOX12	42	10000	6899383	6914055	7.8618	0.0475952	rs11078658	0.005049
5	SOX30	66	10000	157052686	157079428	8.23854	0.0475952	rs35793864	0.004101
7	EIF4H	10	10000	73588705	73611429	6.28157	0.0475952	rs150880	0.0122
8	ZFP41	36	10000	144328990	144344875	8.07299	0.0475952	rs3750213	0.004493
4	SLC9B2	31	10000	103946651	103998170	8.2716	0.0476952	rs66819851	0.004027
12	WNK1	294	10000	862088	1020618	10.4135	0.0477952	rs140036384	0.001251
15	C15orf53	20	10000	38988798	38992239	7.48341	0.0477952	rs17654449	0.006227
1	TUFT1	82	10000	151512780	151556059	9.2648	0.0477952	rs3748606	0.002336
9	GABBR2	1421	10000	101050363	101471479	14.7615	0.0477952	rs774342	0.000122
10	PBLD	160	10000	70042416	70092684	9.22755	0.0478952	rs6480327	0.002384
18	LOC100505549	139	10000	55297533	55336508	10.5754	0.0478952	rs62094186	0.001146
4	RAB28	279	10000	13369346	13485989	9.15751	0.0478952	rs4956003	0.002477
11	PRDX5	3	10000	64085559	64089295	5.78212	0.0479952	rs1047206	0.01619
17	KCNH4	22	10000	40308909	40333296	8.09735	0.0479952	rs9912576	0.004433
1	MYOG	7	10000	203052256	203055166	6.99342	0.0479952	rs923950	0.008181
5	LHFPL2	319	10000	77781037	77944648	11.1821	0.0480952	rs114178254	0.0008259
19	ZNF266	68	10000	9523101	9546254	6.47504	0.0481952	rs1978435	0.01094
1	CTSK	10	10000	150768683	150780917	6.79683	0.0481952	rs149447143	0.009132
20	DSTN	74	10000	17550598	17588652	7.77242	0.0481952	rs4814627	0.005305
1	C1orf123	11	10000	53679771	53686289	6.66146	0.0482952	rs436887	0.009852
8	SNX16	130	10000	82711817	82754521	8.7179	0.0482952	rs114323125	0.003151
16	CMTM3	22	10000	66637934	66647795	7.72206	0.0483952	rs3743718	0.005455
17	WDR81	53	10000	1619816	1641893	8.33961	0.0483952	rs11652502	0.003879
9	TRUB2	14	10000	131071395	131084697	7.49531	0.0483952	rs28636742	0.006186
13	SOX21-AS1	6	10000	95364969	95368199	6.53622	0.0484952	rs11617760	0.01057
2	LIMS2	160	10000	128395995	128439360	11.1787	0.0484952	rs73954691	0.0008274
4	LOC100144602	92	10000	66535678	66559104	9.21912	0.0484952	rs77509384	0.002395
14	CHMP4A	6	10000	24678786	24683036	6.45405	0.0485951	rs2295322	0.01107
1	EMBP1	18	10000	121260909	121313686	6.36337	0.0485951	rs11249433	0.01165
11	MSANTD4	22	10000	105878628	105892954	7.522	0.0486951	rs72981237	0.006095
15	MYO5A	548	10000	52599479	52821247	11.0219	0.0486951	rs34908689	0.0009004
6	GCM2	15	10000	10873455	10882098	7.84222	0.0486951	rs2076257	0.005104
8	ASAP1	1132	10000	131064350	131455906	12.4975	0.0486951	rs11781752	0.0004075
12	CAPRIN2	116	10000	30862485	30907448	8.88705	0.0487951	rs12320609	0.002872
1	MAB21L3	52	10000	116654375	116677861	8.8369	0.0488951	rs116298431	0.002952
20	UCKL1	19	10000	62571181	62587800	7.8697	0.0488951	rs817310	0.005027
3	LINC01267	15	10000	14389950	14394068	7.5488	0.0488951	rs4685139	0.006005
6	GTF2H4	13	10000	30875976	30881880	6.05461	0.0488951	rs116194834	0.01387
15	LINS	153	10000	101109427	101142445	9.9632	0.0489951	rs28862879	0.001597
2	ELMOD3	80	10000	85581842	85618875	9.43399	0.0489951	rs6731223	0.00213
7	MAGI2	4920	10000	77646373	79082890	16.5679	0.0489951	rs66650670	4.694e-05
11	ANO9	52	10000	417929	442011	8.69035	0.0490951	rs11600020	0.003199
11	CD3D	6	10000	118209788	118213459	5.85759	0.0490951	rs3181261	0.01551
14	LOC102723809	67	10000	64980868	65007086	8.1039	0.0490951	rs12385910	0.004417
20	DEFB132	15	10000	238376	241736	6.6207	0.0490951	rs73892099	0.01008
5	NIPAL4	45	10000	156887026	156901730	8.48951	0.0492951	rs72809283	0.003572
10	DNMBP	373	10000	101635333	101769676	10.8691	0.0493951	rs7910794	0.0009778
19	HAMP	5	10000	35773409	35776045	6.25705	0.0493951	rs55863037	0.01237
19	ZNF818P	7	10000	53716200	53719355	5.13634	0.0493951	rs59782712	0.02343
4	ANKRD37	12	10000	186317839	186321390	5.93536	0.0493951	rs1053218	0.01484
9	PLAA	137	10000	26903367	26947468	9.45043	0.0493951	rs77921995	0.002111
12	SUOX	9	10000	56391042	56399309	6.98883	0.0494951	rs75207464	0.008202
17	STAT5B	59	10000	40351194	40428424	9.13183	0.0494951	rs9900213	0.002512
19	LOC101928295	77	10000	49871961	49891338	7.26887	0.0494951	rs76029565	0.007016
1	FAM71A	7	10000	212797788	212800120	7.01344	0.0494951	rs79381401	0.00809
5	FST	10	10000	52776263	52782304	7.33273	0.0494951	rs78453036	0.006771
6	LOC100996634	114	10000	109557816	109591717	8.90494	0.0494951	rs62436601	0.002844
11	VPS26B	28	10000	134094560	134117686	8.26755	0.049595	rs117101984	0.004036
2	SLC30A3	7	10000	27477439	27485960	6.02058	0.049595	rs73924411	0.01414
6	ARG1	16	10000	131894343	131905472	6.96844	0.049595	rs73778022	0.008296
8	GEM	29	10000	95261484	95274547	7.65421	0.049595	rs2623166	0.005664
1	PAPPA2	701	10000	176432306	176811970	12.1108	0.049695	rs6701132	0.0005013
2	GRB14	180	10000	165349322	165478360	10.4781	0.049695	rs1521522	0.001208
6	C6orf147	123	10000	73983861	74020088	8.88769	0.049695	rs13203622	0.002871
8	C8orf12	279	10000	11225910	11296166	11.1873	0.049695	rs12156009	0.0008236
10	BICC1	535	10000	60272903	60588845	11.0186	0.049795	rs2393455	0.000902
15	FBXO22	44	10000	76196199	76227608	8.3108	0.049795	rs28636006	0.003941
17	CDK5RAP3	30	10000	46047893	46059152	8.34477	0.049795	rs17617053	0.003868
7	SSPO	143	10000	149473130	149531053	10.0028	0.049795	rs6960187	0.001563
8	JPH1	143	10000	75146938	75233562	10.4507	0.049795	rs4237013	0.001226
12	OASL	44	10000	121458094	121477045	8.99986	0.049895	rs2708081	0.0027
19	SIRT2	36	10000	39369194	39390502	8.92626	0.049895	rs73043807	0.002811
2	ADCY3	352	10000	25042038	25142055	11.0238	0.049895	rs10195271	0.0008995
9	UNC13B	316	10000	35161988	35405332	11.2239	0.049895	rs117421354	0.0008075
10	ATOH7	2	10000	69990351	69991870	4.63096	0.049995	rs61854782	0.0314
13	COMMD6	69	10000	76099349	76123575	9.25464	0.049995	rs56084319	0.002349
5	DROSHA	293	10000	31400601	31532282	11.335	0.049995	rs2330702	0.0007606
8	VCPIP1	41	10000	67542487	67579452	7.96654	0.049995	rs142006084	0.004765

## Sheet: Supplementary_Table5
Supplementary Table 5: Nominally significant (P < 0.05) Vegas2-generated genes for migraine
Chr	Gene	nSNPs	nSims	Start Position	Stop Position	Test	Pvalue	TopSNP	TopSNP-pvalue
10	PLCE1	577	1000000	95753745	96088148	33.5741	9.99999e-07	rs2274224	6.86e-09
10	PLCE1-AS1	15	1000000	96039046	96046827	33.5741	9.99999e-07	rs2274224	6.86e-09
11	MRVI1	344	1000000	10594637	10715535	45.1771	9.99999e-07	rs4910165	1.8e-11
12	LRP1	93	1000000	57522281	57607125	104.033	9.99999e-07	rs11172113	1.99e-24
12	STAT6	20	1000000	57489186	57505196	65.4469	9.99999e-07	rs324012	5.97e-16
1	MEF2D	52	1000000	156433512	156470634	46.2143	9.99999e-07	rs2274319	1.06e-11
1	PRDM16	1097	1000000	2985741	3355185	73.0408	9.99999e-07	rs10218452	1.27e-17
2	MROH2A	219	1000000	234684324	234742069	32.9471	9.99999e-07	rs13425899	9.47e-09
2	TRPM8	307	1000000	234826042	234928166	63.4922	9.99999e-07	rs10170399	1.61e-15
5	POC5	161	1000000	74970023	75013313	32.621	9.99999e-07	rs145639541	1.12e-08
6	FHL5	130	1000000	97010423	97064512	57.7149	9.99999e-07	rs11153082	3.03e-14
6	KCNK5	126	1000000	39156746	39197251	35.3675	9.99999e-07	rs10456100	2.73e-09
6	PHACTR1	1204	1000000	12717036	13288075	37.2863	9.99999e-07	rs9349379	1.02e-09
6	UFL1	36	1000000	96969701	97003151	51.9237	9.99999e-07	rs9486467	5.77e-13
19	TMEM91	30	1000000	41869870	41889987	25.5548	2e-06	rs11670739	4.3e-07
2	MSL3P1	7	1000000	234774089	234777055	25.6561	2e-06	rs213544	4.08e-07
5	ANKDD1B	143	1000000	74907300	74967671	29.7285	2e-06	rs42854	4.97e-08
12	PRR13	2	1000000	53835432	53840427	23.4833	3e-06	rs8652	1.26e-06
19	TGFB1	27	1000000	41836435	41859838	26.2241	3e-06	rs10406816	3.04e-07
7	SUGCT	1044	1000000	40174574	40900366	33.9585	3e-06	rs10234636	5.63e-09
9	ASTN2	2887	1000000	119187503	120177317	33.8444	5e-06	rs34979631	5.97e-09
9	TRIM32	27	1000000	119449580	119463579	24.5743	5e-06	rs76973802	7.15e-07
19	B9D2	16	1000000	41860321	41870078	22.9647	6.99999e-06	rs4803457	1.65e-06
12	MAP3K12	11	1000000	53874275	53893444	24.1721	7.99999e-06	rs3816806	8.81e-07
12	PCBP2	22	1000000	53845885	53874946	25.3107	8.99999e-06	rs12828029	4.88e-07
2	HJURP	66	1000000	234745346	234763212	25.2561	8.99999e-06	rs685139	5.02e-07
6	HEY2	19	1000000	126070731	126082415	23.4381	9.99999e-06	rs1811852	1.29e-06
12	SP1	64	1000000	53773978	53810226	25.45	1.3e-05	rs12818938	4.54e-07
10	ARMS2	13	1000000	124214178	124216868	21.7786	1.5e-05	rs36212733	3.06e-06
14	FLJ31306	41	1000000	58732082	58764855	23.2132	1.9e-05	rs2145600	1.45e-06
14	PSMA3	36	1000000	58711522	58738727	22.9187	2.3e-05	rs7158746	1.69e-06
14	ACTR10	55	1000000	58666832	58702353	23.909	2.5e-05	rs1212694	1.01e-06
10	HTRA1	178	1000000	124221040	124274424	25.0315	2.9e-05	rs11200643	5.64e-07
14	ARID4A	73	1000000	58765221	58840451	23.5772	3.1e-05	rs57044214	1.2e-06
12	AMHR2	14	1000000	53817638	53825318	18.967	4.3e-05	rs12368222	1.33e-05
6	LOC643623	148	1000000	125995498	126041364	22.595	4.5e-05	rs1268070	2e-06
10	HPSE2	1691	1000000	100216833	100995632	27.2913	5.19999e-05	rs112255710	1.75e-07
1	HOOK1	117	1000000	60280532	60342050	22.8082	5.69999e-05	rs113133506	1.79e-06
7	LMOD2	15	1000000	123295860	123304147	19.9451	5.69999e-05	rs7809453	7.97e-06
10	CNNM1	124	1000000	101088855	101154087	23.3938	7.89999e-05	rs4917860	1.32e-06
17	SLC35G6	6	1000000	7384720	7386383	17.9992	9.39999e-05	rs8065577	2.21e-05
8	TMEM66	31	1000000	29920527	29940724	19.0702	9.49999e-05	rs16876410	1.26e-05
3	PLXNB1	15	1000000	48445260	48471460	17.4888	0.000111	rs9817615	2.89e-05
12	NAB2	9	1000000	57482676	57489259	18.6874	0.000112	rs324020	1.54e-05
9	LOC100128505	197	1000000	119266561	119324572	21.9975	0.000115	rs4836746	2.73e-06
8	LEPROTL1	74	1000000	29952921	29995222	20.3321	0.000124	rs4733354	6.51e-06
6	NCOA7	241	1000000	126102306	126253176	22.9187	0.000126	rs9388453	1.69e-06
5	PRR7-AS1	10	1000000	176864889	176874945	15.3889	0.000155	rs335434	8.75e-05
20	ZNF831	134	1000000	57766074	57834167	21.6395	0.000199	rs194869	3.29e-06
17	POLR2A	116	1000000	7387697	7417935	19.9499	0.0002	rs9906630	7.95e-06
19	ATP5SL	12	1000000	41937222	41945843	15.3717	0.000205	rs13346603	8.83e-05
7	WASL	132	1000000	123321980	123389125	20.3767	0.000226	rs3779260	6.36e-06
19	B3GNT8	6	1000000	41931263	41934635	15.0446	0.000233	rs284662	0.000105
19	EXOSC5	16	1000000	41892275	41903256	15.7787	0.000246	rs10853751	7.12e-05
11	NDUFS3	5	1000000	47600561	47606115	16.3556	0.000258	rs71475924	5.25e-05
4	SLIT2-IT1	6	1000000	20393811	20396479	16.5939	0.000259	rs60472094	4.63e-05
17	TNFSF13	4	1000000	7461608	7464925	15.9165	0.000262	rs143094271	6.62e-05
8	MIR548O2	423	1000000	29920257	30108213	21.1577	0.000271	rs112147334	4.23e-06
19	BCKDHA	60	1000000	41903693	41930910	17.0714	0.000277	rs12982607	3.6e-05
12	MYF6	5	1000000	81101407	81103256	15.2616	0.0003	rs79738065	9.36e-05
12	LOC101927653	413	1000000	58959741	59175498	21.663	0.000303	rs7138579	3.25e-06
15	FES	25	1000000	91427664	91439006	16.9001	0.00031	rs76792278	3.94e-05
20	SLC24A3	1339	1000000	19193289	19703541	24.0473	0.000311	rs6046147	9.4e-07
2	SRD5A2	89	1000000	31749655	31806040	19.5326	0.000315	rs72794638	9.89e-06
11	FNBP4	68	1000000	47738068	47788993	18.4113	0.000316	rs11039361	1.78e-05
11	DKFZp779M0652	4	1000000	45792982	45793909	15.5821	0.000319	rs79229167	7.9e-05
12	SDR9C7	34	1000000	57316937	57328189	18.133	0.000319	rs840161	2.06e-05
6	QKI	282	1000000	163835674	163999628	19.6707	0.000336	rs74978444	9.2e-06
11	MDK	3	1000000	46402333	46405387	14.6858	0.000339	rs35324223	0.000127
3	TMPPE	4	1000000	33131907	33138293	15.3107	0.000345	rs61749982	9.12e-05
22	BRD1	94	1000000	50166936	50218452	18.5443	0.000356	rs57072226	1.66e-05
12	MYO1A	48	1000000	57422300	57444549	18.034	0.000361	rs4759272	2.17e-05
17	ZBTB4	55	1000000	7362684	7387568	18.8287	0.000364	rs8076791	1.43e-05
1	KIAA0754	10	1000000	39875175	39882154	15.9657	0.000383	rs17343193	6.45e-05
1	ECM1	11	1000000	150480486	150486265	16.0223	0.000411	rs13294	6.26e-05
17	TP53	44	1000000	7571719	7590868	18.0605	0.000412	rs35850753	2.14e-05
5	PRR7	7	1000000	176873795	176883287	14.3105	0.000412	rs466256	0.000155
5	GRK6	19	1000000	176853686	176869850	16.352	0.000417	rs1130857	5.26e-05
5	PPIC	34	1000000	122359077	122372425	17.7798	0.000423	rs11241668	2.48e-05
8	CLDN23	13	1000000	8559665	8561617	15.5583	0.000426	rs61754959	8e-05
11	PACSIN3	14	1000000	47199072	47208010	15.7602	0.000427	rs79215096	7.19e-05
9	HRCT1	3	1000000	35906188	35907138	14.4754	0.000431	rs79284865	0.000142
1	CCDC17	8	1000000	46085715	46089731	14.3473	0.000436	rs3014241	0.000152
1	LINC00568	2	1000000	150488232	150490508	13.8595	0.000443	rs7513247	0.000197
9	LOC441461	37	1000000	102648599	102668883	16.8905	0.000469	rs7029481	3.96e-05
12	ATF7	190	1000000	53901639	54020199	19.0854	0.000473	rs11170566	1.25e-05
16	GPR139	158	1000000	20043042	20085100	19.455	0.000477	rs889203	1.03e-05
7	LOC102724555	17	1000000	123254214	123265011	17.1033	0.000489	rs11769381	3.54e-05
1	PRPF3	76	1000000	150293927	150325704	17.1744	0.000498	rs2794684	3.41e-05
17	GIP	43	1000000	47035917	47045955	17.2774	0.000509999	rs1973408	3.23e-05
10	NRP1	537	1000000	33466418	33623833	21.6221	0.000510999	rs2506142	3.32e-06
1	BMP8A	61	1000000	39957317	39995541	18.422	0.000532999	rs60069508	1.77e-05
22	RBX1	12	1000000	41347350	41369019	15.2236	0.000542999	rs2413631	9.55e-05
13	MCF2L-AS1	4	1000000	113621797	113622952	14.4754	0.000555999	rs2993272	0.000142
11	HARBI1	7	1000000	46624855	46638777	13.6865	0.000558999	rs7924401	0.000216
1	RPRD2	297	1000000	150336989	150449041	18.8556	0.000589999	rs1617829	1.41e-05
6	RAET1L	24	1000000	150341265	150346668	16.5255	0.000610999	rs56761194	4.8e-05
11	MYEOV	10	1000000	69061621	69064754	15.0446	0.000619999	rs11228610	0.000105
5	DBN1	17	1000000	176883613	176900694	14.671	0.000665999	rs28837979	0.000128
7	ASB15	60	1000000	123241920	123277934	17.8502	0.000670999	rs34030532	2.39e-05
1	TARS2	55	1000000	150459839	150480085	17.3011	0.000714999	rs12023378	3.19e-05
3	CCDC51	8	1000000	48473579	48481529	13.1469	0.000715999	rs13069724	0.000288
1	LOC101926944	32	1000000	60238466	60254501	16.5857	0.000718999	rs80053041	4.65e-05
2	EDAR	202	1000000	109510926	109605828	19.3468	0.000720999	rs115730255	1.09e-05
17	TAOK1	233	1000000	27717942	27878921	17.6465	0.000724999	rs118090463	2.66e-05
19	ALKBH7	9	1000000	6372443	6375261	14.1037	0.000727999	rs114241482	0.000173
15	NR2F2-AS1	106	1000000	96809615	96870590	18.4656	0.000746999	rs1437588	1.73e-05
16	PAM16	13	1000000	4390251	4401373	15.4593	0.000755999	rs495664	8.43e-05
19	SAE1	50	1000000	47634079	47713893	16.502	0.000767999	rs6509314	4.86e-05
12	RPL6	3	1000000	112842993	112847443	12.8088	0.000773999	rs2233861	0.000345
1	MACF1	660	1000000	39549838	39952810	20.5432	0.000779999	rs114333084	5.83e-06
11	MRGPRE	19	1000000	3249040	3253616	15.9193	0.000783999	rs11026051	6.61e-05
3	GLB1	327	1000000	33038099	33138694	19.7753	0.000786999	rs56340842	8.71e-06
1	ELF3	9	1000000	201979689	201986315	14.6858	0.000806999	rs55666208	0.000127
14	BRMS1L	57	1000000	36295596	36341169	15.7471	0.000836999	rs55905084	7.24e-05
3	ATRIP	15	1000000	48488113	48507054	14.1366	0.000843999	rs6442124	0.00017
9	PAPPA-AS1	6	1000000	119160436	119162885	13.7939	0.000882999	rs8653	0.000204
20	LOC101926955	18	1000000	25936447	25949924	14.4231	0.000892999	rs34843733	0.000146
20	NINL	263	1000000	25433337	25566153	18.034	0.000957999	rs6138584	2.17e-05
9	PTCH1	109	100000	98205263	98279247	16.418	0.00096999	rs145965565	5.08e-05
1	PPIEL	79	100000	39987951	40025370	17.5971	0.00097999	rs755249	2.73e-05
3	TREX1	2	1000000	48506918	48509044	12.2311	0.000985999	rs11797	0.00047
10	HELLS	103	1000000	96305523	96361856	16.3665	0.000988999	rs61886179	5.22e-05
13	ATP4B	13	100000	114303121	114312513	15.171	0.00098999	rs4076410	9.82e-05
19	GTF2F1	38	100000	6379579	6393291	14.613	0.00098999	rs17625356	0.000132
1	PTPRVP	85	100000	202137178	202158577	15.5989	0.00098999	rs12401678	7.83e-05
1	MRPS21	46	1000000	150266261	150281414	15.5893	0.000992999	rs471464	7.87e-05
10	SUV39H2	33	100000	14920781	14946304	16.2131	0.00100999	rs11594111	5.66e-05
17	FKBP10	20	100000	39968961	39979469	15.3231	0.00101999	rs4796709	9.06e-05
20	C20orf96	120	100000	251503	271419	18.1609	0.00101999	rs61354763	2.03e-05
10	NOC3L	72	1000000	96092988	96122683	16.5137	0.00102	rs11187895	4.83e-05
11	ALX4	159	100000	44282277	44331716	18.4328	0.00102999	rs2863056	1.76e-05
19	ZC3H4	38	100000	47567446	47617009	15.3696	0.00102999	rs138753258	8.84e-05
12	LOC101927415	6	100000	124065631	124068874	13.704	0.00104999	rs4930714	0.000214
10	TBC1D12	182	100000	96162185	96296089	17.6537	0.00105999	rs11598846	2.65e-05
4	KIAA1211	466	100000	57036360	57196890	20.218	0.00107999	rs13127195	6.91e-06
14	TMEM251	2	100000	93651295	93653431	11.7452	0.00112999	rs1268371	0.00061
16	TMEM170A	60	100000	75480922	75498584	15.6454	0.00112999	rs1030261	7.64e-05
1	IQGAP3	79	100000	156495196	156542396	16.9439	0.00112999	rs59359496	3.85e-05
3	TMA7	9	100000	48481685	48485537	12.2351	0.00112999	rs7126	0.000469
8	MBOAT4	37	100000	29989186	30002200	15.4548	0.00112999	rs2134559	8.45e-05
17	UBE2Z	54	100000	46985730	47006422	15.0446	0.00113999	rs35929648	0.000105
8	KIAA1456	523	100000	12803182	12887284	19.9427	0.00113999	rs2946503	7.98e-06
21	ADAMTS5	131	100000	28290230	28339439	17.4433	0.00116999	rs7283210	2.96e-05
12	TAC3	10	100000	57403780	57410344	13.4424	0.00118999	rs2122694	0.000246
5	NR3C1	206	100000	142657495	142815077	18.0964	0.00118999	rs12655166	2.1e-05
11	AGBL2	77	100000	47681142	47736928	16.0901	0.00120999	rs7941404	6.04e-05
16	CFDP1	412	100000	75327607	75467387	17.6609	0.00121999	rs77505915	2.64e-05
17	SPDYE4	11	100000	8656423	8661877	13.45	0.00122999	rs72848105	0.000245
17	TNFSF12-TNFSF13	38	100000	7452374	7464925	15.9165	0.00125999	rs143094271	6.62e-05
7	ING3	32	100000	120590816	120615711	13.7484	0.00125999	rs2721354	0.000209
7	TSPAN12	89	100000	120427373	120498177	16.0013	0.00125999	rs6953454	6.33e-05
3	FBXW12	36	100000	48413708	48436190	12.5652	0.00126999	rs7635522	0.000393
10	TAF5	18	100000	105127723	105148822	14.543	0.00131999	rs10883859	0.000137
2	IL36B	87	100000	113779667	113810444	16.4903	0.00132999	rs34976770	4.89e-05
9	NR4A3	35	100000	102584136	102629173	15.2118	0.00135999	rs1131339	9.61e-05
14	DLST	45	100000	75348593	75370450	13.8405	0.00136999	rs55707505	0.000199
15	MAN2A2	41	100000	91447419	91465815	15.1481	0.00138999	rs1266492	9.94e-05
5	MIR548AO	23	100000	92922830	92957593	14.8404	0.00138999	rs114489117	0.000117
12	MPHOSPH9	168	100000	123640942	123717785	16.2435	0.00139999	rs1790125	5.57e-05
16	EXOC3L1	5	100000	67218281	67224107	11.1931	0.00140999	rs116152273	0.000821
20	GINS1	81	100000	25388322	25429191	16.0375	0.00140999	rs2482908	6.21e-05
5	ADAMTS16	751	100000	5140442	5320412	20.7956	0.00140999	rs10068364	5.11e-06
11	C11orf70	73	100000	101918168	101955291	15.5371	0.00142999	rs78005354	8.09e-05
15	LOC100507472	6	100000	101847455	101849509	12.0497	0.00143999	rs735163	0.000518
16	TPPP3	8	100000	67423709	67427438	13.3531	0.00143999	rs11075657	0.000258
20	PTK6	21	100000	62159775	62168723	14.0821	0.00143999	rs182303666	0.000175
22	EP300-AS1	10	100000	41581218	41593505	13.8217	0.00143999	rs9607782	0.000201
9	FXN	242	100000	71650478	71715094	18.0873	0.00143999	rs10781392	2.11e-05
10	CALHM1	11	100000	105213143	105218648	14.3848	0.00144999	rs4918016	0.000149
15	CHSY1	250	100000	101715927	101792137	17.712	0.00144999	rs116643984	2.57e-05
5	LOC100505841	26	100000	121495870	121518358	14.4887	0.00144999	rs17432743	0.000141
5	SNX24	468	100000	122181159	122344902	17.8186	0.00144999	rs2447820	2.43e-05
7	ISPD-AS1	166	100000	16250110	16310229	17.5153	0.00144999	rs73291495	2.85e-05
11	SLC22A8	31	100000	62760295	62783317	15.8136	0.00147999	rs34701054	6.99e-05
5	LOC101929645	39	100000	29065350	29073330	13.9176	0.00147999	rs594904	0.000191
20	ZNF337	38	100000	25653830	25677540	14.6273	0.00149999	rs6050790	0.000131
20	NANP	27	100000	25593572	25604648	14.4622	0.00150998	rs6138616	0.000143
19	PLEKHJ1	3	100000	2233154	2236328	10.9109	0.00154998	rs191615952	0.000956
10	CNNM2	371	100000	104678074	104838344	17.8502	0.00156998	rs6584534	2.39e-05
22	THOC5	107	100000	29904155	29949736	16.3665	0.00156998	rs12167058	5.22e-05
3	SCN11A	227	100000	38887259	38995142	17.1578	0.00156998	rs4320030	3.44e-05
5	FAM172A	524	100000	92953430	93447404	18.8287	0.00156998	rs10055389	1.43e-05
6	SAYSD1	23	100000	39071839	39082865	15.2556	0.00156998	rs41273118	9.39e-05
8	MYBL1	52	100000	67474409	67525480	14.4754	0.00159998	rs79752382	0.000142
14	RALGAPA1P	305	100000	36007960	36278350	17.2892	0.00160998	rs28672082	3.21e-05
1	MANEAL	4	100000	38259773	38267278	12.304	0.00162998	rs72661832	0.000452
21	DSCR10	2	100000	39578249	39580738	11.164	0.00163998	rs55870334	0.000834
5	RANBP17	732	100000	170288895	170727019	17.7569	0.00165998	rs1862549	2.51e-05
10	DNAJB12	51	100000	74092587	74114907	12.9672	0.00167998	rs9416018	0.000317
12	CNTN1	1088	100000	41086243	41466213	19.879	0.00172998	rs116901033	8.25e-06
17	ATP5G1	6	100000	46970147	46973232	12.1082	0.00172998	rs519537	0.000502
9	TMEM8B	37	100000	35829221	35854844	14.613	0.00172998	rs77395154	0.000132
16	NOL3	3	100000	67204399	67209640	11.1006	0.00174998	rs75280012	0.000863
12	ADAM1A	3	100000	112336866	112339706	9.92555	0.00175998	rs3742000	0.00163
14	RALGAPA1	305	100000	36007557	36278432	17.2892	0.00176998	rs28672082	3.21e-05
12	MAPKAPK5-AS1	2	100000	112277572	112280706	9.74103	0.00177998	rs2879603	0.001802
12	TMEM194A	30	100000	57449425	57472574	14.8404	0.00177998	rs61937566	0.000117
2	IL36RN	44	100000	113816214	113822320	13.6952	0.00177998	rs114189538	0.000215
10	NT5C2	223	100000	104847773	104953063	16.7035	0.00178998	rs3736922	4.37e-05
11	ARHGAP1	21	100000	46698624	46722215	14.2625	0.00180998	rs78301405	0.000159
20	PYGB	156	100000	25228705	25278648	16.0013	0.00181998	rs2281559	6.33e-05
5	KCTD16	493	100000	143550436	143856944	18.3794	0.00181998	rs6580315	1.81e-05
11	PRDM11	281	100000	45115563	45256675	17.6973	0.00182998	rs10838428	2.59e-05
7	SPAM1	106	100000	123565285	123611461	16.5939	0.00182998	rs2402678	4.63e-05
1	ZBTB17	46	100000	16268363	16302627	15.0267	0.00185998	rs4661674	0.000106
5	ADRA1B	137	100000	159343739	159400017	16.6353	0.00187998	rs10515805	4.53e-05
16	TRADD	3	100000	67188088	67193812	11.2436	0.00188998	rs13312723	0.000799
19	NDUFB7	11	100000	14676889	14682889	13.2958	0.00188998	rs35189199	0.000266
8	NEFM	3	100000	24771273	24776606	11.5106	0.00189998	rs196864	0.000692
17	CHRNB1	29	100000	7348405	7360932	13.7939	0.00192998	rs111972643	0.000204
16	ELMO3	7	100000	67233027	67237927	11.801	0.00193998	rs114080435	0.000592
5	LOC553103	166	100000	131646968	131705608	15.3589	0.00194998	rs146950191	8.89e-05
8	FAM49B	313	100000	130851838	131028897	18.4766	0.00198998	rs76215390	1.72e-05
11	ATG13	36	100000	46638825	46697568	13.869	0.00199998	rs7108770	0.000196
9	POMT1	71	100000	134378288	134399193	14.2984	0.00203998	rs11243406	0.000156
11	SYT13	98	100000	45261852	45307884	15.6829	0.00204998	rs11038372	7.49e-05
5	MRPS36	32	100000	68513572	68525985	13.5524	0.00204998	rs13178023	0.000232
1	PABPC4	31	100000	40026484	40042521	14.5156	0.00205998	rs3768321	0.000139
7	ZMIZ2	27	100000	44788529	44809479	14.5707	0.00205998	rs56077345	0.000135
11	SLC25A22	6	100000	790474	798269	12.0934	0.00207998	rs112750986	0.000506
5	CENPH	40	100000	68485374	68506184	13.4809	0.00208998	rs350092	0.000241
12	TMED2	39	100000	124069075	124082688	13.8311	0.00210998	rs7973766	0.0002
16	KCTD19	29	100000	67323392	67360661	13.6435	0.00213998	rs10852437	0.000221
9	LOC100507346	14	100000	98225890	98232301	12.2192	0.00214998	rs2036963	0.000473
22	NIPSNAP1	68	100000	29950797	29977326	14.7007	0.00216998	rs62227968	0.000126
16	LRRC29	15	100000	67241041	67260901	12.2551	0.00218998	rs59137598	0.000464
1	FLJ37453	34	100000	16160709	16174642	13.9176	0.00218998	rs12135073	0.000191
9	GABBR2	1421	100000	101050363	101471479	21.0822	0.00218998	rs10986740	4.4e-06
2	LOC100130451	12	100000	214141276	214148929	11.8748	0.00220998	rs34258369	0.000569
6	FUT9	635	100000	96463844	96663488	18.4877	0.00221998	rs716192	1.71e-05
13	LINC00448	421	100000	63246417	63381492	17.9992	0.00225998	rs4283106	2.21e-05
18	LOC101927642	2	100000	14969605	14970467	10.4735	0.00227998	rs786021	0.001211
16	SLC9A5	14	100000	67282854	67306094	12.5416	0.00230998	rs8053227	0.000398
22	ARVCF	176	100000	19957401	20004309	16.2435	0.00231998	rs2073746	5.57e-05
5	HMGCR	31	100000	74632992	74657926	13.4197	0.00233998	rs4704209	0.000249
11	FKBP2	2	100000	64008412	64011607	10.288	0.00235998	rs2070765	0.001339
7	MAGI2-AS3	53	100000	79082272	79100524	13.4121	0.00236998	rs7802883	0.00025
12	EIF2B1	34	100000	124105569	124118323	13.1404	0.00238998	rs9919	0.000289
3	CDC25A	19	100000	48198667	48229801	12.633	0.00238998	rs3731553	0.000379
17	LEPREL4	21	100000	39958204	39968451	12.8582	0.00239998	rs1061843	0.000336
5	NR2F1	4	100000	92919042	92930315	10.5851	0.00239998	rs3776601	0.00114
11	KBTBD4	2	100000	47593748	47600567	10.4811	0.00242998	rs2280231	0.001206
21	CHODL	908	100000	19289656	19639687	19.8175	0.00242998	rs73316218	8.52e-06
16	KIAA0895L	5	100000	67209504	67217883	11.317	0.00244998	rs61733768	0.000768
19	NCCRP1	9	100000	39687603	39692522	10.7075	0.00244998	rs12610064	0.001067
11	PPP1R14B	4	100000	64011950	64014413	10.4223	0.00245998	rs12798333	0.001245
16	UBE2I	86	100000	1359153	1377019	14.777	0.00246998	rs2369700	0.000121
11	ZNF408	5	100000	46722316	46727466	11.3194	0.00248998	rs12574918	0.000767
9	LINC00094	11	100000	136890560	136896719	12.2153	0.00248998	rs58289869	0.000474
10	PDCD11	60	100000	105156411	105206019	14.9228	0.00252997	rs10883865	0.000112
20	ENTPD6	88	100000	25176338	25207360	15.3252	0.00253997	rs2179638	9.05e-05
11	AMBRA1	109	100000	46417961	46615619	14.9914	0.00254997	rs7932866	0.000108
20	ABHD12	192	100000	25275378	25371618	15.8163	0.00255997	rs2500403	6.98e-05
17	SERPINF1	62	100000	1665258	1680859	13.7847	0.00260997	rs5008945	0.000205
1	EIF2D	51	100000	206764973	206785904	14.2863	0.00261997	rs10863727	0.000157
12	OGFOD2	5	100000	123459353	123464588	10.6954	0.00264997	rs883563	0.001074
1	INPP5B	158	100000	38326368	38412729	15.7289	0.00265997	rs28470722	7.31e-05
14	FCF1	15	100000	75179849	75203390	12.0824	0.00266997	rs8007145	0.000509
5	NR2F1-AS1	106	100000	92745061	92917026	14.974	0.00272997	rs6860632	0.000109
15	ATP10A	716	100000	25923859	26108349	19.3644	0.00273997	rs8024828	1.08e-05
10	RPEL1	3	100000	105005643	105007773	10.964	0.00275997	rs4917386	0.000929
21	DSCR8	77	100000	39493544	39528605	13.6182	0.00276997	rs35513716	0.000224
11	LRP4	84	100000	46878267	46940173	14.671	0.00277997	rs116855242	0.000128
16	SLC7A6	48	100000	68298418	68335726	13.9675	0.00277997	rs77517043	0.000186
11	TMEM126B	11	100000	85339616	85347583	12.6379	0.00279997	rs17850847	0.000378
7	SSPO	143	100000	149473130	149531053	15.7628	0.00280997	rs12534509	7.18e-05
10	MCU	108	100000	74451888	74647452	13.3242	0.00286997	rs7911632	0.000262
14	SERPINA6	77	100000	94770584	94789688	15.0993	0.00286997	rs61980636	0.000102
16	CBFB	64	100000	67063049	67134958	12.6729	0.00287997	rs7198767	0.000371
22	TANGO2	157	100000	20004522	20053449	16.1866	0.00289997	rs79693817	5.74e-05
12	MLXIP	171	100000	122516633	122631894	13.9275	0.00290997	rs7487608	0.00019
15	HDDC3	3	100000	91474147	91475799	10.177	0.00290997	rs1052535	0.001422
1	MYBPH	20	100000	203136938	203144942	13.2748	0.00290997	rs2642531	0.000269
16	CORO7-PAM16	129	100000	4390251	4466962	15.4593	0.00292997	rs495664	8.43e-05
5	HINT1	20	100000	130494975	130501041	12.2113	0.00293997	rs10036296	0.000475
1	C1orf195	27	100000	15490691	15498120	13.1731	0.00294997	rs72640791	0.000284
20	PHF20	386	100000	34359922	34538288	15.0993	0.00295997	rs6121045	0.000102
8	SNX16	130	100000	82711817	82754521	14.3227	0.00298997	rs114323125	0.000154
1	TPRG1L	10	100000	3541555	3546694	11.8585	0.00299997	rs4648541	0.000574
15	RCCD1	28	100000	91498105	91506355	13.5044	0.00302997	rs1105291	0.000238
1	SF3A3	66	100000	38422651	38455761	13.6099	0.00304997	rs111411614	0.000225
11	ARFGAP2	20	100000	47185848	47198676	13.4654	0.00306997	rs61897848	0.000243
1	CIART	6	100000	150255228	150259501	11.5106	0.00308997	rs9126	0.000692
20	APCDD1L-AS1	288	100000	57090434	57194948	17.4562	0.00308997	rs117367859	2.94e-05
7	ETV1	330	100000	13930855	14031050	17.1578	0.00309997	rs2282868	3.44e-05
1	KIAA0040	99	100000	175126122	175162229	14.7461	0.00311997	rs10912903	0.000123
5	LINC00847	5	100000	180257956	180262726	10.6031	0.00313997	rs79222378	0.001129
10	DCLRE1C	100	100000	14946609	14996431	15.7787	0.00314997	rs35654459	7.12e-05
12	DDX55	71	100000	124086671	124105482	13.8124	0.00316997	rs34097324	0.000202
14	RPS6KL1	46	100000	75370656	75389145	13.869	0.00319997	rs3742783	0.000196
16	NMRAL1	39	100000	4511694	4524896	12.2153	0.00319997	rs4785967	0.000474
1	LINC00982	10	100000	2976180	2984289	12.509	0.00325997	rs2075969	0.000405
22	LOC90834	7	100000	50171537	50173958	11.0393	0.00325997	rs4824095	0.000892
16	E2F4	6	100000	67226067	67232821	11.2693	0.00326997	rs3730408	0.000788
16	LRRC36	83	100000	67360746	67419109	13.3898	0.00327997	rs17686630	0.000253
11	HSD17B12	324	100000	43702142	43878169	15.9775	0.00328997	rs118099236	6.41e-05
7	SFRP4	52	100000	37945534	37956525	13.2678	0.00329997	rs1802074	0.00027
14	INSM2	2	100000	36003247	36006260	9.38473	0.00330997	rs1952391	0.002188
16	DNAJA3	50	100000	4475805	4506775	13.6606	0.00330997	rs8046837	0.000219
5	CDK7	95	100000	68530621	68573257	13.2266	0.00332997	rs7711657	0.000276
1	HIST2H2BE	2	100000	149856009	149858232	8.56016	0.00335997	rs15931	0.003436
10	LOC100129055	60	100000	38464598	38503273	12.5463	0.00337997	rs2505217	0.000397
2	LINC01126	3	100000	43454349	43455994	10.6212	0.00338997	rs116570228	0.001118
16	PLEKHG4	12	100000	67311412	67323403	12.0861	0.00340997	rs61738731	0.000508
10	LINC00502	77	100000	92805564	92821916	13.3242	0.00341997	rs7917503	0.000262
10	MTRNR2L7	8	100000	37890365	37891859	11.1841	0.00341997	rs77081466	0.000825
1	MTMR11	11	100000	149900542	149908791	11.164	0.00343997	rs78420505	0.000834
8	ELP3	209	100000	27947747	28048669	15.4041	0.00344997	rs73228808	8.68e-05
9	ABO	196	100000	136130562	136150630	15.3024	0.00346997	rs647800	9.16e-05
10	AS3MT	107	100000	104629209	104661655	15.009	0.00347997	rs10748835	0.000107
16	C16orf70	24	100000	67143914	67182442	12.2271	0.00347997	rs58843677	0.000471
1	SF3B4	9	100000	149895208	149900144	9.50064	0.00350996	rs17643644	0.002054
14	SNX6	153	100000	35030617	35099366	14.5707	0.00356996	rs28454795	0.000135
19	ZNF317	85	100000	9251055	9274091	12.8863	0.00358996	rs8109550	0.000331
16	GLG1	356	100000	74481325	74641042	16.6103	0.00359996	rs6564147	4.59e-05
4	KLHL8	88	100000	88081255	88141760	14.4231	0.00359996	rs6840470	0.000146
11	YAP1	230	100000	101981191	102104154	15.5185	0.00362996	rs12421242	8.17e-05
16	FHOD1	15	100000	67263291	67281425	11.9791	0.00362996	rs28730536	0.000538
1	EPHA10	184	100000	38181645	38230824	15.2296	0.00364996	rs113014554	9.52e-05
2	CARF	119	100000	203776940	203851208	13.9776	0.00370996	rs72926788	0.000185
3	IL5RA	110	100000	3108007	3152058	16.1281	0.00375996	rs3804793	5.92e-05
12	PITPNM2	68	100000	123468026	123594975	13.3458	0.00376996	rs940904	0.000259
5	ARL15	1252	100000	53180613	53606403	19.4182	0.00379996	rs156439	1.05e-05
11	SBF2	1600	100000	9800213	10315754	18.6874	0.00382996	rs139275268	1.54e-05
11	F2	45	100000	46740742	46761056	12.4366	0.00393996	rs61884307	0.000421
12	ATP2B1	102	100000	89981825	90049844	14.4231	0.00393996	rs111337717	0.000146
11	CKAP5	103	100000	46765083	46867859	14.0607	0.00394996	rs79625022	0.000177
7	PER4	5	100000	9673899	9675447	10.1209	0.00395996	rs2062925	0.001466
17	DCAF7	25	100000	61627795	61671642	12.8196	0.00396996	rs143469918	0.000343
1	YRDC	11	100000	38268613	38273865	11.5052	0.00402996	rs2291297	0.000694
2	YIPF4	33	100000	32502957	32531658	13.5686	0.00405996	rs72798734	0.00023
11	DGKZ	35	100000	46354454	46402104	13.2064	0.00406996	rs2046768	0.000279
17	NLE1	8	100000	33458340	33469334	11.733	0.00406996	rs67146623	0.000614
9	CCL19	4	100000	34689566	34691274	10.2593	0.00409996	rs3176813	0.00136
1	SPEN	121	100000	16174358	16266950	13.585	0.00412996	rs12121918	0.000228
10	C10orf32-ASMT	140	100000	104613966	104661655	15.009	0.00416996	rs10748835	0.000107
12	TMEM120B	150	100000	122150657	122219974	15.171	0.00416996	rs61952240	9.82e-05
18	MPPE1	76	100000	11883471	11908796	14.974	0.00416996	rs149175678	0.000109
1	RASSF5	176	100000	206680862	206762616	15.5371	0.00417996	rs7535580	8.09e-05
14	KIAA0586	89	100000	58894102	59015549	15.0627	0.00418996	rs74244882	0.000104
17	LOC101928418	109	100000	12575178	12609452	14.3848	0.00418996	rs139910819	0.000149
4	HOPX	100	100000	57514153	57547872	14.5988	0.00418996	rs6836932	0.000133
8	DLC1_2	1270	100000	13162115	13372429	18.8828	0.00418996	rs13279822	1.39e-05
6	LINC01277	167	100000	143287558	143358719	15.6013	0.00419996	rs9484682	7.82e-05
22	NF2	148	100000	29999544	30094589	15.1595	0.00421996	rs2857646	9.88e-05
22	CHADL	17	100000	41625513	41636935	12.2793	0.00424996	rs5751069	0.000458
17	METTL2A	12	100000	60501245	60527454	10.5435	0.00429996	rs11651893	0.001166
19	UBE2S	8	100000	55912649	55919325	11.0352	0.00429996	rs11672075	0.000894
12	NOP2	11	100000	6666035	6677498	11.0665	0.00431996	rs11064254	0.000879
11	PCSK7	82	100000	117075786	117103241	14.5021	0.00432996	rs236916	0.00014
2	DBIL5P2	4	100000	63344985	63346677	10.1171	0.00435996	rs4671457	0.001469
5	LOC100505878	8	100000	86042634	86045589	11.0064	0.00438996	rs1422236	0.000908
17	FGF11	6	100000	7342688	7348251	10.9109	0.00439996	rs9906416	0.000956
5	BTNL9	48	100000	180467224	180488523	13.2198	0.00441996	rs2277935	0.000277
19	CLEC17A	86	100000	14693895	14721956	14.6418	0.00443996	rs34711726	0.00013
14	PROX2	19	100000	75319735	75330537	12.1996	0.00446996	rs17102847	0.000478
14	EAPP	69	100000	34985134	35008943	12.875	0.00449996	rs7797	0.000333
6	DEFB114	12	100000	49928004	49931818	10.6937	0.00450995	rs73737275	0.001075
6	HMGA1	12	100000	34204576	34214008	10.5136	0.00450995	rs1011905	0.001185
17	KRT18P55	32	100000	26603011	26634408	13.5282	0.00451995	rs646019	0.000235
16	CDIP1	54	100000	4560676	4588816	11.6414	0.00453995	rs7195209	0.000645
10	MICU1	308	100000	74127083	74385949	13.7574	0.00454995	rs12777811	0.000208
5	GABRP	88	100000	170210722	170241050	13.869	0.00458995	rs12515575	0.000196
7	TMED4	7	100000	44618761	44621827	10.306	0.00460995	rs3750098	0.001326
12	HNF1A-AS1	4	100000	121407640	121410095	10.3553	0.00466995	rs79710799	0.001291
10	BTBD16	228	100000	124030820	124097676	15.4841	0.00467995	rs12763004	8.32e-05
1	LRRC8C	137	100000	90098643	90185094	14.3597	0.00468995	rs10801771	0.000151
22	BMS1P20	48	100000	22652462	22677324	12.4233	0.00472995	rs1044437	0.000424
17	KCNH6	37	100000	61600694	61626338	13.2748	0.00473995	rs147130580	0.000269
22	HORMAD2	183	100000	30476452	30573062	14.5707	0.00482995	rs73164714	0.000135
4	MSX1	19	100000	4861391	4865660	11.9826	0.00483995	rs3116581	0.000537
1	PEAR1	66	100000	156863522	156886226	14.0607	0.00486995	rs61813833	0.000177
1	TMEM69	9	100000	46153846	46160108	9.40835	0.00488995	rs61784795	0.00216
12	MSRB3	257	100000	65672422	65860687	15.0267	0.00492995	rs3858644	0.000106
19	CLPP	24	100000	6361462	6368915	11.4787	0.00493995	rs1049343	0.000704
5	LOC100652758	6	100000	151149353	151151069	9.93347	0.00493995	rs2964577	0.001623
7	SLC35B4	73	100000	133974089	134001827	12.0354	0.00493995	rs1646702	0.000522
1	PDPN	86	100000	13910251	13944452	14.7927	0.00494995	rs74226261	0.00012
6	BCLAF1	9	100000	136578000	136610989	8.6739	0.00497995	rs703192	0.003228
12	LOC643339	916	100000	93397533	93771512	18.3173	0.00503995	rs111403185	1.87e-05
7	ISPD	976	100000	16127151	16460947	17.5153	0.00503995	rs73291495	2.85e-05
5	LOC101928136	157	100000	173134601	173173212	15.0809	0.00504995	rs4868312	0.000103
15	PRC1-AS1	67	100000	91509598	91531854	12.2232	0.00505995	rs2301825	0.000472
1	NASP	39	100000	46049659	46084578	12.367	0.00506995	rs2991980	0.000437
12	MBD6	7	100000	57916658	57923931	9.88645	0.00507995	rs61741508	0.001665
12	LOC100652999	2	100000	53907767	53911392	9.13329	0.00512995	rs11170567	0.00251
5	SNX2	202	100000	122110690	122170234	14.4887	0.00514995	rs12513640	0.000141
20	LOC339568	22	100000	37842423	37853391	12.9731	0.00518995	rs149320554	0.000316
5	CDKN2AIPNL	5	100000	133737755	133747598	10.0194	0.00518995	rs328043	0.001549
5	LOC101927379	290	100000	121964646	122066255	15.2616	0.00523995	rs13172078	9.36e-05
5	TIGD6	13	100000	149372685	149380730	11.5133	0.00523995	rs973078	0.000691
16	ATP6V0D1	31	100000	67471916	67515089	10.8424	0.00524995	rs116254322	0.000992
1	C1orf54	11	100000	150245182	150253335	10.966	0.00524995	rs10157197	0.000928
9	PAPPA	299	100000	118916070	119164600	16.352	0.00529995	rs978201	5.26e-05
20	GATA5	28	100000	61038552	61051026	12.6478	0.00532995	rs6061550	0.000376
10	INA	19	100000	105036919	105050108	12.007	0.00533995	rs1163085	0.00053
2	HOXD10	3	100000	176981491	176984670	9.72984	0.00533995	rs72923454	0.001813
5	SREK1	43	100000	65440045	65479444	12.0497	0.00533995	rs1651831	0.000518
2	C2orf42	81	100000	70377016	70418151	12.7034	0.00534995	rs7569453	0.000365
2	B3GALT1	63	100000	168675181	168727366	13.8217	0.00538995	rs10194405	0.000201
11	LRP4-AS1	33	100000	46867961	46895967	11.9279	0.00543995	rs60940896	0.000553
12	GTF2H3	61	100000	124118285	124147151	11.8879	0.00543995	rs12816883	0.000565
12	LINC00936	5	100000	90102731	90105729	10.5498	0.00545995	rs2280715	0.001162
13	PCDH9-AS3	12	100000	67551520	67559908	11.6617	0.00546995	rs9571706	0.000638
9	CREB3	3	100000	35732316	35737005	9.76982	0.00546995	rs10814274	0.001774
2	HOXD3	23	100000	177028804	177037826	11.5404	0.00548995	rs116220032	0.000681
18	LOC400644	41	100000	14946265	14973755	10.4735	0.00549995	rs786021	0.001211
17	FXR2	36	100000	7494547	7518215	13.1599	0.00554994	rs34416693	0.000286
19	CEACAM5	46	100000	42212529	42234341	12.979	0.00561994	rs75582708	0.000315
22	ASCC2	126	100000	30184596	30234293	13.6865	0.00561994	rs5763529	0.000216
16	DPEP3	5	100000	68009565	68014452	10.0146	0.00569994	rs255048	0.001553
2	HOXD9	3	100000	176987412	176989645	8.94192	0.00570994	rs711822	0.002787
6	GPR126	146	100000	142623055	142767403	13.4424	0.00570994	rs7774095	0.000246
6	HDGFL1	4	100000	22569677	22570750	9.72984	0.00572994	rs2076506	0.001813
4	EPGN	11	100000	75174186	75182520	9.22909	0.00573994	rs72654839	0.002382
10	LARP4B	233	100000	852853	977645	14.7309	0.00574994	rs112691179	0.000124
1	INTS3	52	100000	153700566	153746555	12.6085	0.00574994	rs9426891	0.000384
11	MTCH2	18	100000	47638857	47664206	11.4292	0.00575994	rs7118178	0.000723
6	C6orf1	7	100000	34214156	34216885	10.8276	0.00576994	rs34410712	0.001
14	OR4E2	4	100000	22133296	22134238	9.62928	0.00577994	rs970382	0.001915
1	ADORA1	111	100000	203096835	203136533	14.1146	0.00578994	rs12565957	0.000172
9	RGP1	4	100000	35749276	35753264	9.47668	0.00579994	rs1570249	0.002081
19	ZNF805	81	100000	57752052	57774106	13.1863	0.00580994	rs77109307	0.000282
11	PLCB3	25	100000	64018994	64036924	12.5136	0.00582994	rs28395876	0.000404
17	LOC101929767	31	100000	41300383	41322420	10.5498	0.00583994	rs35029972	0.001162
22	TUG1	7	100000	31365196	31375380	10.6562	0.00583994	rs7284767	0.001097
9	UCK1	17	100000	134399182	134406662	11.733	0.00584994	rs10793887	0.000614
12	CHD4	63	100000	6679247	6716551	12.4015	0.00585994	rs11064262	0.000429
19	ZNF419	20	100000	57999078	58006048	10.3298	0.00589994	rs6510082	0.001309
1	TMEM56-RWDD3	352	100000	95583478	95710509	15.7134	0.00589994	rs145925412	7.37e-05
5	YIPF5	38	100000	143537722	143550278	11.6099	0.00589994	rs1833501	0.000656
1	SERINC2	67	100000	31882411	31907527	13.0211	0.00592994	rs140137989	0.000308
10	HSPA14	38	100000	14880158	14913740	12.367	0.00593994	rs17268499	0.000437
6	MCHR2-AS1	145	100000	100441913	100524295	14.1146	0.00595994	rs72940354	0.000172
15	PRC1	87	100000	91509267	91537881	12.2232	0.00596994	rs2301825	0.000472
14	YLPM1	109	100000	75230068	75304013	12.6085	0.00599994	rs8022046	0.000384
16	LINC00311	16	100000	85316563	85321685	11.5874	0.00603994	rs143245313	0.000664
12	PAH	258	100000	103232103	103311381	14.7309	0.00606994	rs7138986	0.000124
13	KLHL1	1625	100000	70274724	70682625	18.1893	0.00607994	rs61964236	2e-05
17	KLHL11	23	100000	40009798	40021629	11.4011	0.00610994	rs4796723	0.000734
16	CES4A	15	100000	67022491	67043659	10.6478	0.00611994	rs79631548	0.001102
11	NUP160	96	100000	47799669	47870057	12.75	0.00612994	rs34228231	0.000356
2	LOC101929231	661	100000	150443871	150704748	16.3484	0.00612994	rs711886	5.27e-05
16	CRYM	84	100000	21269838	21314404	13.003	0.00614994	rs9938449	0.000311
11	KRTAP5-10	4	100000	71276608	71277666	9.31247	0.00616994	rs66487667	0.002276
17	TLK2	97	100000	60556385	60692841	12.3415	0.00620994	rs11657101	0.000443
3	CPOX	32	100000	98298289	98312455	12.4998	0.00621994	rs66531283	0.000407
11	KDM2A	94	100000	66886739	67025550	13.193	0.00626994	rs1253778	0.000281
10	DMBT1	39	100000	124320180	124403252	11.6043	0.00634994	rs2742224	0.000658
21	KCNJ15	209	100000	39601836	39673746	14.0084	0.00635994	rs2836226	0.000182
1	ARHGEF11	214	100000	156904631	157015162	13.9374	0.00638994	rs16837847	0.000189
10	PLEKHA1	133	100000	124134093	124191871	13.9275	0.00640994	rs184800107	0.00019
8	VDAC3	11	100000	42249278	42263455	10.3411	0.00646994	rs6773	0.001301
3	EAF1	19	100000	15469063	15484120	11.6675	0.00647994	rs73144120	0.000636
16	RFWD3	144	100000	74655296	74700779	13.8787	0.00650993	rs4888270	0.000195
1	NDUFS5	31	100000	39491966	39500308	11.7916	0.00652993	rs6691796	0.000595
1	NGF	169	100000	115828536	115880857	15.1179	0.00655993	rs6328	0.000101
6	MCHR2	156	100000	100367785	100442114	13.9275	0.00655993	rs2397688	0.00019
10	CYP2C18	138	100000	96443250	96495947	13.6099	0.00656993	rs61886201	0.000225
6	LOC101928519	294	100000	19068773	19180711	14.777	0.00665993	rs77981680	0.000121
8	KLF10	11	100000	103661004	103668130	11.1114	0.00669993	rs13275089	0.000858
15	FURIN	22	100000	91411821	91426688	10.7927	0.00670993	rs1573643	0.001019
15	TGM7	32	100000	43568478	43594453	11.9178	0.00670993	rs117578063	0.000556
13	RAB20	183	100000	111175412	111214071	14.6858	0.00671993	rs57878500	0.000127
8	SLC25A37	242	100000	23386362	23430063	15.0446	0.00675993	rs2942202	0.000105
11	TRIM22	138	100000	5710816	5732093	14.671	0.00676993	rs7935564	0.000128
11	DDB2	53	100000	47236492	47260769	12.2753	0.00677993	rs4647709	0.000459
11	C11orf49	233	100000	46958239	47185931	14.1928	0.00680993	rs1352307	0.000165
14	RNF31	18	100000	24616658	24629870	12.1231	0.00681993	rs743272	0.000498
11	OR4A15	3	100000	55135359	55136394	8.65201	0.00685993	rs1425193	0.003267
1	CAMTA1	2379	100000	6845383	7829766	19.7996	0.00686993	rs10158342	8.6e-06
20	LINC00029	27	100000	61665568	61668380	9.23294	0.00694993	rs3746749	0.002377
16	MGRN1	212	100000	4674824	4740975	14.2625	0.00696993	rs841171	0.000159
1	OTUD7B	44	100000	149912228	149982686	11.4655	0.00699993	rs11205308	0.000709
4	SNHG8	3	100000	119199916	119200978	9.21302	0.00700993	rs658642	0.002403
12	VPS37B	27	100000	123349874	123380712	10.8276	0.00703993	rs12811983	0.001
15	HAPLN3	79	100000	89420518	89438770	13.1275	0.00704993	rs8040399	0.000291
22	MORC2-AS1	9	100000	31318294	31322640	10.6445	0.00704993	rs7290078	0.001104
10	GUCY2GP	135	100000	114067935	114116353	13.2198	0.00707993	rs10787444	0.000277
11	VEGFB	9	100000	64002055	64006736	10.168	0.00707993	rs12794145	0.001429
15	LOC101929655	192	100000	81616673	81735417	13.8124	0.00707993	rs11634288	0.000202
10	USMG5	7	100000	105148808	105156270	10.3074	0.00711993	rs7093039	0.001325
9	RPL35	5	100000	127620157	127624240	8.85305	0.00711993	rs2067553	0.002926
8	DLC1_1	2153	100000	12940871	13372429	18.8828	0.00713993	rs13279822	1.39e-05
1	GPBP1L1	96	100000	46092975	46152302	11.6156	0.00715993	rs1135850	0.000654
12	RDH16	12	100000	57345215	57351418	10.732	0.00716993	rs11172074	0.001053
11	DCDC5	136	100000	30885149	31014233	12.5604	0.00722993	rs10835727	0.000394
6	DEFB133	8	100000	49913813	49917157	10.053	0.00722993	rs56015791	0.001521
11	MS4A15	25	100000	60524339	60544204	12.3122	0.00725993	rs4939452	0.00045
14	IRF9	4	100000	24630421	24635774	9.4126	0.00727993	rs2236350	0.002155
16	VASN	19	100000	4421848	4433529	11.1886	0.00739993	rs76813374	0.000823
1	LINC00862	88	100000	200311671	200342920	12.1306	0.00739993	rs2808508	0.000496
6	EXOC2	630	100000	485137	693141	16.7519	0.00743993	rs17135931	4.26e-05
7	ASNS	60	100000	97481428	97501854	12.7659	0.00748993	rs12669125	0.000353
13	GAS6	72	100000	114523521	114567046	11.6501	0.00749993	rs6602903	0.000642
9	ARPC5L	5	100000	127631483	127639696	8.63591	0.00754992	rs1999589	0.003296
10	CYP2C9	179	100000	96698414	96749148	13.5443	0.00762992	rs28371678	0.000233
15	SENP8	35	100000	72406598	72433311	10.954	0.00766992	rs36074415	0.000934
18	DSC2	48	100000	28645941	28682388	12.7344	0.00768992	rs1789057	0.000359
3	METTL6	41	100000	15451376	15469042	11.391	0.00770992	rs73144111	0.000738
10	ARHGAP12	195	100000	32094325	32217804	13.7216	0.00771992	rs118076480	0.000212
17	HLF	111	100000	53342320	53402426	14.3722	0.00772992	rs11650482	0.00015
1	MIR4427	2	100000	233759897	233759965	8.28654	0.00772992	rs701214	0.003994
19	BBC3	5	100000	47724078	47736023	9.96666	0.00775992	rs2032810	0.001594
14	LINC00618	7	100000	97409915	97411731	9.54312	0.00779992	rs78892879	0.002007
7	ZNF107	90	100000	64126460	64171960	12.1306	0.00787992	rs13231070	0.000496
10	OIT3	22	100000	74653338	74692787	9.57728	0.00788992	rs7100001	0.00197
5	PPP2CA	77	100000	133532147	133561950	11.5762	0.00789992	rs4299778	0.000668
19	GLTSCR2	32	100000	48248792	48260323	10.9363	0.00795992	rs55813323	0.000943
11	TAGLN	17	100000	117070039	117075508	11.1954	0.00799992	rs494356	0.00082
17	SMYD4	168	100000	1682828	1733175	13.0829	0.00803992	rs72822450	0.000298
16	HMOX2	89	100000	4524703	4560348	11.6472	0.00804992	rs7195361	0.000643
13	ATXN8OS	108	100000	70681344	70713885	13.4272	0.00805992	rs12585505	0.000248
9	FAM221B	18	100000	35817013	35828744	10.7819	0.00810992	rs2281646	0.001025
1	ADSS	83	100000	244571793	244615436	12.0318	0.00814992	rs3127462	0.000523
4	AFF1	421	100000	87856153	88062206	15.0267	0.00814992	rs342462	0.000106
11	HBE1	2	100000	5289579	5291373	7.21765	0.00816992	rs67385638	0.007219
12	HMGA2	177	100000	66218239	66360071	14.1701	0.00816992	rs1563834	0.000167
19	CD22	55	100000	35820068	35838264	13.7574	0.00819992	rs56212031	0.000208
11	EPS8L2	55	100000	706119	727727	13.4348	0.00820992	rs11246286	0.000247
7	DDX56	30	100000	44605015	44614137	10.306	0.00821992	rs17725305	0.001326
19	AMH	7	100000	2249112	2252072	10.0017	0.00829992	rs61736572	0.001564
11	DNAJC4	6	100000	63997752	64001753	9.8256	0.00834992	rs35090903	0.001721
1	RWDD3	30	100000	95699710	95712781	11.2459	0.00834992	rs72966572	0.000798
5	GDNF	76	100000	37812778	37839782	13.1339	0.00838992	rs2910700	0.00029
3	CRTAP	65	100000	33155449	33189265	12.6379	0.00845992	rs76821069	0.000378
11	OR4C45	17	100000	48366899	48373999	10.972	0.00846992	rs11039691	0.000925
17	EVI2B	13	100000	29630787	29641130	9.43227	0.00847992	rs9807077	0.002132
9	IGFBPL1	78	100000	38406524	38424444	13.3314	0.00847992	rs113186635	0.000261
5	CCNB1	30	100000	68462836	68474070	10.3988	0.00853991	rs390169	0.001261
3	PFKFB4	32	100000	48555116	48594227	11.9279	0.00857991	rs62261468	0.000553
3	LINC00692	21	100000	25900022	25915186	10.1297	0.00860991	rs71313314	0.001459
12	ASB8	21	100000	48541571	48551377	11.0104	0.00864991	rs12297470	0.000906
9	LINC00950	7	100000	35860270	35865515	9.93574	0.00870991	rs4879932	0.001621
3	CACNA1D	671	100000	53529075	53846492	17.098	0.00877991	rs9311507	3.55e-05
9	BRD3	100	100000	136895445	136933141	12.6982	0.00878991	rs75704112	0.000366
3	PLOD2	257	100000	145787227	145879282	13.3604	0.00880991	rs7639115	0.000257
1	DHCR24	116	10000	55315299	55352921	12.7344	0.00889911	rs12122351	0.000359
3	OXSM	4	10000	25831562	25836025	7.97912	0.00889911	rs2932014	0.004732
5	CCDC125	100	10000	68576518	68616410	12.9148	0.00889911	rs34591347	0.000326
7	COG5	641	10000	106842188	107204959	14.9568	0.00889911	rs181660009	0.00011
7	PLEKHA8	185	10000	30067976	30157961	12.5463	0.00889911	rs143562170	0.000397
1	CD101	83	100000	117544371	117579173	13.3972	0.00890991	rs10494192	0.000252
3	PRKCI	260	100000	169940219	170023770	13.2748	0.00890991	rs111677673	0.000269
13	TFDP1	56	10000	114239002	114295788	11.5026	0.0089991	rs4150813	0.000695
1	ADIPOR1	50	10000	202909952	202927700	12.2035	0.0089991	rs59551689	0.000477
2	PPP1R1C	354	10000	182818967	182996109	15.1367	0.0089991	rs181694121	0.0001
11	LOC100652768	23	10000	117066328	117072630	11.1954	0.00909909	rs494356	0.00082
2	ZEB2	164	100000	145141941	145277958	14.5568	0.00911991	rs6740731	0.000136
1	VPS45	72	10000	150039349	150117505	9.33515	0.00919908	rs56397877	0.002248
7	LEP	28	10000	127881330	127897682	11.5514	0.00919908	rs4236625	0.000677
17	FAM64A	22	100000	6347734	6354385	11.3316	0.00922991	rs7218283	0.000762
11	BSX	8	10000	122848356	122852379	8.94323	0.00929907	rs1870761	0.002785
1	CTSK	10	10000	150768683	150780917	10.0947	0.00929907	rs4970976	0.001487
1	WRAP73	23	10000	3547330	3566671	10.3842	0.00929907	rs2244942	0.001271
10	WDR37	210	100000	1102775	1178237	14.436	0.00930991	rs11250278	0.000145
7	ZNF862	42	100000	149535508	149564568	11.6941	0.00930991	rs73168071	0.000627
11	CELF1	80	10000	47487488	47574792	13.0456	0.00939906	rs11039281	0.000304
4	C4orf46	2	10000	159587826	159593407	7.74203	0.00939906	rs11544037	0.005395
22	MORC2	44	100000	31322599	31364187	11.7605	0.00944991	rs737927	0.000605
15	SMAD3	346	10000	67358194	67487533	15.8244	0.00949905	rs12593904	6.95e-05
8	NRG1-IT3	5	100000	32298261	32300241	9.56891	0.00949991	rs16879394	0.001979
9	DOCK8	1205	100000	214864	465259	17.4627	0.0095199	rs67283074	2.93e-05
12	ALDH1L2	258	100000	105413561	105478341	14.1366	0.0095399	rs12372293	0.00017
16	CES5A	288	10000	55880065	55989943	14.2507	0.00959904	rs78439071	0.00016
1	SH3BGRL3	4	10000	26606212	26608013	9.06113	0.00959904	rs12759434	0.002611
21	NDUFV3	67	10000	44313377	44329773	12.2631	0.00959904	rs8131547	0.000462
15	VPS33B	67	100000	91541645	91565851	11.8978	0.0096699	rs79253100	0.000562
10	CAMK1D	1669	10000	12391582	12871733	18.6385	0.00979902	rs10795984	1.58e-05
11	HBG2	4	10000	5274420	5276011	8.01272	0.00979902	rs11036474	0.004645
4	REST	69	10000	57774041	57802010	12.6231	0.00979902	rs6853156	0.000381
5	LARS	226	10000	145492588	145562294	10.3798	0.00979902	rs116041061	0.001274
7	C7orf62	6	10000	88423419	88425031	8.95573	0.00979902	rs59185678	0.002766
6	ULBP3	17	100000	150385742	150390202	10.5419	0.0097999	rs7775383	0.001167
11	RAB30-AS1	3	10000	82783107	82784754	8.63813	0.00989901	rs59426273	0.003292
13	COL4A2	825	10000	110959630	111165373	17.4692	0.00989901	rs35466678	2.92e-05
1	MTF1	55	10000	38275238	38325292	11.0984	0.00989901	rs9729719	0.000864
1	TMEM51	330	10000	15479027	15546974	14.9397	0.00989901	rs742669	0.000111
3	DHX36	73	10000	153993456	154042286	12.1996	0.00989901	rs73160598	0.000478
7	FKBP14	26	10000	30050198	30066417	10.7945	0.00989901	rs17150692	0.001018
13	GAS6-AS1	10	10000	114518582	114545814	9.50601	0.009999	rs12868614	0.002048
17	NKIRAS2	7	10000	40169593	40177656	9.15972	0.009999	rs11079029	0.002474
17	SLFN14	35	10000	33875143	33885110	11.4317	0.009999	rs9904644	0.000722
4	POLR2B	155	10000	57845108	57897334	12.6036	0.009999	rs62310295	0.000385
5	FBN2	606	10000	127593600	127873735	15.6628	0.009999	rs34171917	7.57e-05
6	LOC153910	318	10000	142847591	142959026	13.3677	0.009999	rs263185	0.000256
10	ASCC1	175	10000	73855789	73976892	12.875	0.010099	rs7073342	0.000333
11	SIDT2	49	10000	117049938	117068161	10.9501	0.010099	rs499713	0.000936
12	IFFO1	38	10000	6648693	6665249	10.9881	0.010099	rs59436997	0.000917
1	FAM20B	160	10000	178995073	179045702	13.2403	0.010199	rs116234027	0.000274
4	CCDC149	489	10000	24807738	24981826	15.2717	0.010199	rs2695225	9.31e-05
4	MMRN1	122	10000	90816051	90875780	12.4455	0.010199	rs1442138	0.000419
4	NOA1	41	10000	57829515	57843826	11.8552	0.010199	rs72606404	0.000575
16	GLIS2	9	10000	4382224	4389598	9.78857	0.010299	rs9938257	0.001756
17	MAPT-AS1	33	10000	43920721	43972879	11.2366	0.010299	rs116339787	0.000802
19	TECR	95	10000	14640378	14676792	12.9263	0.010299	rs35394596	0.000324
22	L3MBTL2	81	10000	41601312	41627275	11.2954	0.010299	rs5758265	0.000777
10	REEP3	209	10000	65281122	65384883	13.1146	0.010399	rs9919429	0.000293
1	LOC440700	40	10000	165667986	165679199	11.366	0.010499	rs11579160	0.000748
5	ITGA1	528	10000	52084135	52249485	15.7602	0.010499	rs16876244	7.19e-05
9	C9orf41	87	10000	77597872	77643310	12.1008	0.0105989	rs10465192	0.000504
11	PHRF1	84	10000	576445	612222	12.2631	0.0106989	rs72841255	0.000462
12	IFT81	88	10000	110562139	110656600	12.3415	0.0106989	rs17619763	0.000443
12	VPS29	9	10000	110929327	110939945	9.35564	0.0106989	rs55864430	0.002223
17	NSF	53	10000	44668034	44834828	10.1284	0.0106989	rs145226569	0.00146
1	IRF2BP2	9	10000	234740014	234745271	10.0984	0.0106989	rs7543281	0.001484
6	LINC00581	41	10000	21486291	21512123	9.5477	0.0106989	rs6924399	0.002002
7	LOC100128885	108	10000	64035072	64078967	12.5939	0.0106989	rs10264743	0.000387
11	PSMC3	15	100000	47440319	47448024	10.1835	0.0107599	rs71475912	0.001417
14	RABGGTA	18	10000	24734743	24740833	9.43658	0.0107989	rs11626191	0.002127
16	PRMT7	111	10000	68344876	68391169	12.0934	0.0107989	rs79543001	0.000506
18	SLC14A2	1358	10000	42792946	43263060	17.2892	0.0107989	rs7235910	3.21e-05
4	GYPE	56	10000	144792018	144826716	10.6328	0.0107989	rs7677044	0.001111
5	PRLR	501	10000	35048860	35230691	14.9061	0.0107989	rs249541	0.000113
10	CDNF	32	10000	14861250	14879983	11.5762	0.0108989	rs35258303	0.000668
3	ZNF621	11	10000	40566368	40581285	9.35564	0.0108989	rs10222477	0.002223
7	NXPH1	1092	10000	8473584	8792593	16.5374	0.0108989	rs2189900	4.77e-05
8	IKBKB	86	10000	42128819	42190171	11.709	0.0108989	rs7816867	0.000622
2	KLHL29	1029	10000	23608297	23931483	17.4305	0.0109989	rs7582844	2.98e-05
17	NF1	290	10000	29421944	29704695	12.1763	0.0110989	rs7502029	0.000484
2	LOC151484	75	10000	231751260	231769232	12.2311	0.0110989	rs62195299	0.00047
1	C1orf64	10	10000	16330730	16333184	9.59884	0.0111989	rs1739833	0.001947
9	XPA	23	10000	100437190	100459691	11.1266	0.0111989	rs3176743	0.000851
10	PCGF6	44	10000	105062552	105110891	11.7452	0.0113989	rs7093667	0.00061
13	FGF14-AS2	3	10000	103046927	103048055	6.61629	0.0113989	rs3168724	0.010105
16	TMEM219	14	10000	29973350	29984373	9.46438	0.0113989	rs56357065	0.002095
19	EHD2	69	10000	48216600	48246391	12.247	0.0113989	rs73051728	0.000466
3	DRD3	183	10000	113847498	113918254	13.2471	0.0113989	rs112115712	0.000273
7	PPIA	15	10000	44836240	44842716	10.2797	0.0113989	rs12702088	0.001345
8	DCTN6	48	10000	30013812	30041155	11.2022	0.0113989	rs16876596	0.000817
10	CASC10	3	10000	21783420	21786213	7.99719	0.0114989	rs12770228	0.004685
16	ZDHHC1	25	10000	67428321	67450339	10.4164	0.0114989	rs77568300	0.001249
17	KLHL10	25	10000	39994042	40004599	10.0146	0.0114989	rs8068544	0.001553
17	SNF8	45	10000	47007458	47022154	11.4164	0.0114989	rs55724082	0.000728
1	C1orf87	170	10000	60456065	60539442	14.2744	0.0114989	rs642294	0.000158
4	TIGD2	4	10000	90033967	90036052	7.70199	0.0114989	rs2280099	0.005516
8	CHMP4C	62	10000	82644687	82671748	12.3247	0.0114989	rs17706460	0.000447
11	LOC100128494	9	10000	71725336	71731956	8.6074	0.0115988	rs3750913	0.003348
12	LYRM5	18	10000	25348149	25357949	10.5136	0.0115988	rs7979296	0.001185
14	ARHGEF40	49	10000	21538418	21558406	11.2045	0.0115988	rs1958395	0.000816
15	HCN4	114	10000	73612199	73661605	12.8694	0.0115988	rs60512978	0.000334
3	SST	5	10000	187386693	187388201	8.31265	0.0115988	rs73886434	0.003937
3	TUSC7	26	10000	116428634	116435887	9.89643	0.0115988	rs9866437	0.001656
5	GDNF-AS1	120	10000	37840539	37875900	12.6931	0.0115988	rs1423448	0.000367
9	TRAF2	75	10000	139780964	139821067	10.3171	0.0115988	rs17250281	0.001318
17	MYOCD	242	10000	12569206	12672265	14.3848	0.0116988	rs139910819	0.000149
1	ADAM15	20	10000	155023747	155035252	11.0581	0.0116988	rs12023499	0.000883
3	PRSS42	7	10000	46871893	46875585	8.66657	0.0116988	rs80075339	0.003241
11	BAD	16	10000	64037299	64052176	10.7041	0.0117988	rs11606014	0.001069
11	OR52E8	2	10000	5877978	5878932	7.69187	0.0117988	rs12419602	0.005547
11	PAFAH1B2	93	10000	117014999	117048889	11.8682	0.0117988	rs7116454	0.000571
17	LRRC3C	7	10000	38097726	38100987	9.11588	0.0117988	rs8065126	0.002534
4	SLIT2	827	10000	20255186	20622184	16.5939	0.0117988	rs60472094	4.63e-05
8	SNTG1	2349	10000	50822348	51706678	16.0682	0.0117988	rs7840544	6.11e-05
11	PITPNM1	3	10000	67259238	67272843	8.28927	0.0118988	rs2276120	0.003988
15	MFGE8	51	10000	89441913	89456663	11.9346	0.0118988	rs2015495	0.000551
5	PPARGC1B	391	10000	149109814	149234585	14.8244	0.0118988	rs62383787	0.000118
15	NPTN-IT1	6	10000	73859278	73861884	8.61722	0.0119988	rs80137767	0.00333
9	WDR38	10	10000	127615695	127620170	8.74766	0.0119988	rs10819000	0.0031
12	HECTD4	177	10000	112597991	112819896	12.8976	0.0120988	rs7311681	0.000329
15	ABHD17C	199	10000	80987651	81047962	13.3029	0.0120988	rs7167767	0.000265
17	PDE6G	28	10000	79617488	79623607	10.5884	0.0120988	rs62080191	0.001138
19	DPRX	6	10000	54135309	54140263	8.12164	0.0120988	rs7256933	0.004374
3	NUP210	299	10000	13357729	13461819	12.724	0.0120988	rs113945613	0.000361
4	THAP9-AS1	9	10000	83814604	83822069	8.54013	0.0120988	rs7082	0.003474
12	TRAFD1	19	10000	112563348	112591408	9.66707	0.0121988	rs10850003	0.001876
1	NRD1	119	10000	52254865	52344609	12.2551	0.0121988	rs80179376	0.000464
21	LINC00161	3	10000	29911639	29912677	8.24076	0.0121988	rs62224076	0.004096
22	LOC388849	10	10000	20136108	20137431	9.32134	0.0121988	rs4819867	0.002265
4	MTHFD2L	188	10000	75023828	75168814	12.4998	0.0121988	rs11731340	0.000407
5	FNIP1	181	10000	130977406	131132756	12.2793	0.0121988	rs4492104	0.000458
5	LHFPL2	319	10000	77781037	77944648	13.6015	0.0121988	rs10061226	0.000226
5	RBM27	112	10000	145583162	145668784	9.97245	0.0121988	rs72806127	0.001589
6	EEF1E1	81	10000	8073592	8102828	11.6911	0.0121988	rs12529901	0.000628
6	HCP5	12	10000	31430956	31433586	9.59507	0.0121988	rs116258614	0.001951
12	ASUN	65	10000	27058111	27091254	11.1685	0.0122988	rs11048776	0.000832
18	C18orf54	81	10000	51884286	51908405	11.056	0.0122988	rs12970263	0.000884
20	CSTF1	16	10000	54967426	54979582	10.0433	0.0122988	rs6064391	0.001529
3	NLGN1	2045	10000	173116237	174001139	17.5763	0.0122988	rs35198830	2.76e-05
3	SHISA5	40	10000	48509196	48542259	10.6113	0.0122988	rs6764415	0.001124
5	NKX2-5	3	10000	172659106	172662315	7.59163	0.0122988	rs2277923	0.005864
13	SLC7A1	201	10000	30083550	30169825	13.3171	0.0123988	rs7997827	0.000263
17	ZNF385C	5	10000	40177593	40190044	8.91912	0.0123988	rs9903304	0.002822
1	PIK3R3	155	10000	46505811	46598708	12.2074	0.0123988	rs785518	0.000476
2	ICA1L	177	10000	203637872	203736708	13.0642	0.0123988	rs1971819	0.000301
6	HIST1H2AC	3	10000	26124372	26124918	8.29474	0.0123988	rs116440410	0.003976
22	ST13	33	10000	41220538	41253012	10.5949	0.0124988	rs138342	0.001134
14	IL25	10	10000	23842017	23845612	9.86776	0.0125987	rs4982755	0.001682
17	DNAJC7	46	10000	40128438	40169715	11.2366	0.0125987	rs12948970	0.000802
5	FNDC9	15	10000	156768606	156772729	9.90088	0.0125987	rs10037386	0.001652
7	MOXD2P	44	10000	141940555	141946886	9.55597	0.0125987	rs4301366	0.001993
12	ITGA7	43	10000	56078353	56106089	10.262	0.0126987	rs74867235	0.001358
14	PNN	17	10000	39644386	39652422	9.56891	0.0126987	rs68193573	0.001979
19	SMG9	36	10000	44235300	44259142	9.97013	0.0126987	rs11665973	0.001591
1	MAP3K6	16	10000	27681669	27693337	10.0337	0.0126987	rs45616532	0.001537
5	LOC729506	314	10000	8333595	8457677	14.1928	0.0126987	rs72733862	0.000165
10	RNU6-53P	222	10000	110930414	110999490	12.6628	0.0127987	rs116859987	0.000373
11	CTR9	40	10000	10772810	10801290	11.5596	0.0127987	rs6699	0.000674
10	TAF3	504	10000	7860466	8057016	14.7309	0.0128987	rs407644	0.000124
11	DDI1	5	10000	103907307	103909922	7.95291	0.0128987	rs260808	0.004801
11	ST14	131	10000	130029681	130080257	13.1082	0.0128987	rs17667603	0.000294
16	LOC101927334	29	10000	51051668	51069688	11.4138	0.0128987	rs11640877	0.000729
1	CRCT1	5	10000	152486977	152488481	7.52259	0.0128987	rs2297760	0.006093
5	ATOX1	12	10000	151122382	151138210	9.09079	0.0128987	rs2915823	0.002569
11	HBBP1	3	10000	5263184	5264822	7.41284	0.0129987	rs2071348	0.006476
12	CDK17	247	10000	96672038	96794366	13.45	0.0129987	rs12316006	0.000245
12	LOC101928002	59	10000	70107412	70132348	11.627	0.0129987	rs75079677	0.00065
17	C17orf75	9	10000	30655459	30669228	8.81784	0.0129987	rs9904964	0.002983
19	CHMP2A	4	10000	59062932	59066491	8.18707	0.0129987	rs873104	0.004219
1	VAMP3	34	10000	7831328	7841492	11.6501	0.0129987	rs707460	0.000642
22	HDAC10	14	10000	50683612	50689834	9.77293	0.0129987	rs5771271	0.001771
15	SNX33	10	10000	75941347	75950968	9.39481	0.0130987	rs111488993	0.002176
15	TIPIN	39	10000	66629007	66649054	11.0623	0.0130987	rs9806474	0.000881
1	MYCL	11	10000	40361095	40367687	10.3482	0.0130987	rs11207097	0.001296
1	PTGFRN	217	10000	117452688	117532972	13.0704	0.0130987	rs4659327	0.0003
14	AREL1	47	10000	75127954	75179807	10.0445	0.0131987	rs6574190	0.001528
16	PLA2G15	25	10000	68279246	68294961	9.38138	0.0131987	rs3743739	0.002192
17	CCDC182	3	10000	55821841	55822690	6.60575	0.0131987	rs12451753	0.010165
11	LOC100129216	10	10000	71589498	71595607	8.51516	0.0132987	rs113079271	0.003522
11	TRPT1	3	10000	63991270	63993726	7.74203	0.0132987	rs1059440	0.005395
2	RBM44	85	10000	238707387	238751451	11.9414	0.0132987	rs62196144	0.000549
6	SUMO4	2	10000	149721494	149722182	6.18827	0.0132987	rs237024	0.01286
12	DHX37	212	10000	125431369	125473667	12.6678	0.0133987	rs6488965	0.000372
14	ARF6	2	10000	50359735	50363772	7.19198	0.0133987	rs112017635	0.007323
20	LOC101929698	20	10000	31097761	31108088	9.6159	0.0133987	rs293570	0.001929
16	WFIKKN1	10	10000	681011	684116	8.81295	0.0134987	rs147204774	0.002991
19	SF3A2	38	10000	2236815	2248678	10.9861	0.0134987	rs79099718	0.000918
3	NMD3	62	10000	160939098	160969795	10.4417	0.0134987	rs35310734	0.001232
22	EMID1	163	10000	29601900	29655586	13.3314	0.0135986	rs11912918	0.000261
2	PAX8-AS1	119	10000	113993103	114024600	12.7136	0.0135986	rs11903972	0.000363
11	LOC100507384	5	10000	45743857	45746106	8.02367	0.0136986	rs76627112	0.004617
11	TEX40	5	10000	64067862	64072239	8.02602	0.0136986	rs66968227	0.004611
14	REC8	17	10000	24641233	24649463	10.0361	0.0136986	rs8009671	0.001535
19	ZNF329	68	10000	58637694	58662148	12.2672	0.0136986	rs142677013	0.000461
1	OSBPL9	91	10000	52082545	52254891	11.5818	0.0136986	rs111560165	0.000666
4	MAPK10	1045	10000	86936275	87374283	15.1806	0.0136986	rs56200719	9.77e-05
6	NEU1	2	10000	31826828	31830709	6.9665	0.0136986	rs41267082	0.008305
10	ZNF25	57	10000	38238794	38265453	10.6613	0.0137986	rs74594607	0.001094
11	SSSCA1	2	10000	65337942	65339239	7.28146	0.0137986	rs2236684	0.006967
18	RAX	14	10000	56934266	56940625	8.66714	0.0137986	rs1517033	0.00324
3	CSPG5	18	10000	47603727	47621730	9.53036	0.0137986	rs62260751	0.002021
7	GTF2IRD1	168	10000	73868119	74016920	12.724	0.0137986	rs37635	0.000361
10	ADD3-AS1	100	10000	111705316	111768139	11.1441	0.0138986	rs2419313	0.000843
14	POLE2	76	10000	50110269	50155098	10.1347	0.0139986	rs11625706	0.001455
17	DUSP14	53	10000	35849950	35873588	11.1071	0.0139986	rs11263751	0.00086
2	OLA1	461	10000	174937174	175113365	13.1599	0.0139986	rs12474881	0.000286
3	SMC4	60	10000	160117091	160152749	11.1266	0.0139986	rs73154582	0.000851
12	MAPKAPK5	90	10000	112280031	112331228	10.5998	0.0140986	rs60661425	0.001131
15	UNC45A	70	10000	91473409	91497323	11.1685	0.0140986	rs11073960	0.000832
1	LOC100505666	25	10000	155017667	155036467	11.0581	0.0140986	rs12023499	0.000883
2	PAX8	210	10000	113973573	114036498	13.0766	0.0140986	rs17043176	0.000299
19	TRPM4	144	10000	49661015	49715098	12.2957	0.0141986	rs144589904	0.000454
1	BMP8B	36	10000	40223902	40254533	10.5012	0.0141986	rs914961	0.001193
20	LOC102723590	3	10000	55788751	55790922	7.33619	0.0141986	rs74968922	0.006758
22	AP1B1	106	10000	29723668	29784572	11.724	0.0141986	rs4611747	0.000617
16	ESRP2	3	10000	68262449	68270136	7.324	0.0142986	rs11043	0.006804
2	THSD7B	2135	10000	137748461	138435287	16.7653	0.0142986	rs6731428	4.23e-05
6	TMEM151B	21	10000	44238479	44247182	9.84602	0.0142986	rs1044690	0.001702
12	PFKM	91	10000	48499655	48540187	11.6185	0.0143986	rs12306290	0.000653
1	CCT3	68	10000	156278751	156308206	11.1662	0.0143986	rs3795730	0.000833
1	CLCNKA	61	10000	16348485	16360545	11.1331	0.0143986	rs10927892	0.000848
7	SND1	559	10000	127292201	127732659	14.5568	0.0143986	rs118162968	0.000136
10	ANAPC16	37	10000	73975757	73995618	10.3214	0.0144986	rs3206257	0.001315
12	SPSB2	6	10000	6980099	6982521	8.60468	0.0144986	rs143802088	0.003353
15	RLBP1	23	10000	89753097	89764922	10.0123	0.0144986	rs2283433	0.001555
12	MMAB	84	10000	109991520	110011358	10.7891	0.0145985	rs67432283	0.001021
4	PITX2	33	10000	111538579	111563279	10.3284	0.0145985	rs2739200	0.00131
12	LPAR5	20	10000	6728000	6745297	10.6462	0.0146985	rs2886271	0.001103
12	NANOG	48	10000	7941994	7948655	9.92104	0.0146985	rs4438116	0.001634
6	ATAT1	20	10000	30594612	30614598	10.1513	0.0146985	rs149915948	0.001442
12	HNF1A	87	10000	121416548	121440314	12.0678	0.0147985	rs1169295	0.000513
12	NCOR2	600	10000	124808956	125052010	16.2744	0.0147985	rs138759859	5.48e-05
14	NEK9	53	10000	75548817	75593778	9.83847	0.0147985	rs175463	0.001709
1	SV2A	13	10000	149874871	149889434	8.60251	0.0147985	rs16835135	0.003357
22	XPNPEP3	37	10000	41253084	41328823	10.8518	0.0147985	rs9611435	0.000987
7	PURB	6	10000	44915891	44924984	8.32329	0.0147985	rs56066170	0.003914
10	FAM175B	46	10000	126490353	126525239	10.1616	0.0148985	rs2277263	0.001434
12	TMEM116	123	10000	112369086	112451023	11.0686	0.0148985	rs10735077	0.000878
17	FNDC8	12	10000	33448630	33457751	9.37971	0.0148985	rs28633099	0.002194
17	RAP1GAP2	629	10000	2699731	2941035	16.1571	0.0148985	rs11657531	5.83e-05
3	COLQ	214	10000	15491639	15563258	12.6478	0.0148985	rs2124493	0.000376
16	LOC100505942	5	10000	67551608	67562648	7.76223	0.0149985	rs34697097	0.005335
2	FAM49A	268	10000	16730729	16847134	14.0929	0.0149985	rs888575	0.000174
17	MRC2	93	10000	60704761	60770962	12.0971	0.0150985	rs12452590	0.000505
20	ZNF217	26	10000	52183609	52199636	9.8931	0.0150985	rs2741372	0.001659
5	SPARC	60	10000	151040656	151066615	11.4447	0.0150985	rs1864964	0.000717
10	CYP2C8	140	10000	96796528	96829254	12.1533	0.0151985	rs11572177	0.00049
5	COL4A3BP	205	10000	74666927	74807806	12.0283	0.0151985	rs12656938	0.000524
7	YWHAEP1	6	10000	63894070	63895895	8.48239	0.0151985	rs73125103	0.003586
17	GNA13	11	10000	63005406	63052920	7.82109	0.0152985	rs12945514	0.005164
5	POLK	105	10000	74807656	74895646	10.7496	0.0152985	rs114984621	0.001043
17	SPATA22	126	10000	3343305	3375142	11.3835	0.0153985	rs149841077	0.000741
19	UBXN6	27	10000	4445002	4457791	9.42283	0.0153985	rs411833	0.002143
5	LOC101929380	216	10000	86415964	86543835	12.8088	0.0153985	rs16902548	0.000345
5	NADK2	76	10000	36192690	36242381	10.4046	0.0153985	rs6865319	0.001257
9	RAPGEF1	370	10000	134452156	134612925	13.7305	0.0153985	rs77232709	0.000211
11	RBM4	22	10000	66406087	66435858	10.6546	0.0154985	rs146935556	0.001098
12	RAD9B	42	10000	110940004	110969891	10.8574	0.0154985	rs55929252	0.000984
13	KLF12	1174	10000	74260148	74708066	16.6819	0.0154985	rs7336992	4.42e-05
19	STK11	38	10000	1205797	1228434	10.0591	0.0154985	rs60977562	0.001516
22	JOSD1	18	10000	39081547	39096459	9.43744	0.0154985	rs78356403	0.002126
5	LOC648987	101	10000	43014830	43067541	11.2436	0.0154985	rs6886261	0.000799
17	UBE2G1	104	10000	4172511	4269969	10.8183	0.0155984	rs75195523	0.001005
3	KAT2B	476	10000	20081523	20195896	14.3349	0.0155984	rs78443473	0.000153
7	LOC100507468	2	10000	69061123	69062481	6.74843	0.0155984	rs2270162	0.009383
10	SFXN2	36	10000	104474297	104498946	10.982	0.0156984	rs2265309	0.00092
12	ALDH2	33	10000	112204690	112247789	10.2257	0.0156984	rs10774638	0.001385
12	ACAD10	58	10000	112123856	112194911	11.056	0.0157984	rs658051	0.000884
14	VTI1B	47	10000	68117866	68141602	10.6411	0.0157984	rs56185554	0.001106
5	CCDC112	50	10000	114602884	114632458	10.8859	0.0157984	rs72813852	0.000969
12	PDZRN4	1193	10000	41582249	41968392	15.1367	0.0158984	rs17573404	0.0001
16	FAM65A	16	10000	67562716	67580691	8.94323	0.0158984	rs150369207	0.002785
17	LOC101928104	194	10000	66624294	66675747	12.3841	0.0158984	rs11868207	0.000433
3	NR1I2	125	10000	119499330	119537332	12.8361	0.0158984	rs2472679	0.00034
5	PJA2	236	10000	108670409	108745675	12.1725	0.0158984	rs437112	0.000485
10	FAM170B-AS1	137	10000	50329883	50359592	11.4266	0.0159984	rs34056748	0.000724
11	ARRB1	177	10000	74971165	75062875	13.6182	0.0159984	rs11602383	0.000224
14	HHIPL1	85	10000	100111479	100143011	11.1507	0.0159984	rs11626111	0.00084
16	LOC283914	6	10000	34597786	34626084	8.268	0.0159984	rs10438601	0.004035
6	TULP1	50	10000	35465650	35480679	11.092	0.0159984	rs7743057	0.000867
11	CREB3L1	67	10000	46299188	46342972	11.5651	0.0160984	rs1044796	0.000672
12	ATP2A2	65	10000	110719031	110788897	11.8136	0.0160984	rs11065631	0.000588
19	PRSS57	75	10000	685545	695461	11.4138	0.0160984	rs7359958	0.000729
1	MAN1A2	386	10000	117910084	118068320	12.3584	0.0160984	rs10801959	0.000439
14	SPTSSA	79	10000	34902143	34931468	10.6295	0.0161984	rs2003043	0.001113
17	NLGN2	19	10000	7311501	7323183	10.5754	0.0161984	rs62061175	0.001146
3	RPP14	43	10000	58291971	58305920	10.4796	0.0161984	rs2292679	0.001207
19	DUS3L	18	10000	5785152	5791249	8.54643	0.0162984	rs2290777	0.003462
3	SSR3	45	10000	156257928	156272973	9.74716	0.0162984	rs3773713	0.001796
6	PACRG-AS1	57	10000	163731016	163745505	10.9109	0.0162984	rs9365552	0.000956
9	IKBKAP	270	10000	111629799	111696608	12.9969	0.0162984	rs11791391	0.000312
10	JMJD1C	522	10000	64926980	65225761	13.0955	0.0163984	rs7075195	0.000296
7	SCRN1	156	10000	29959718	30029905	11.8488	0.0163984	rs78816914	0.000577
15	RPL4	19	10000	66791652	66797193	9.86448	0.0164984	rs111385971	0.001685
1	HTR6	31	10000	19991779	20007459	9.90646	0.0164984	rs115124268	0.001647
20	APCDD1L	116	10000	57034425	57089949	12.3841	0.0164984	rs17448954	0.000433
8	LOC286114	40	10000	20831496	20852630	11.1707	0.0164984	rs1851252	0.000831
6	EYA4-AS1	788	10000	133823389	134210144	15.2596	0.0165983	rs111667655	9.37e-05
14	EDDM3B	21	10000	21236585	21239107	9.47492	0.0167983	rs726935	0.002083
1	MFSD2A	10	10000	40420783	40435640	9.62067	0.0167983	rs1492701	0.001924
3	SPTSSB	94	10000	161062579	161089871	10.6047	0.0168983	rs7610985	0.001128
10	MIR1256_10	260	10000	74119697	74336541	11.3785	0.0169983	rs7071040	0.000743
22	LDOC1L	24	10000	44888449	44894005	8.39962	0.0169983	rs131163	0.003753
3	KBTBD8	15	10000	67048726	67061632	9.45478	0.0169983	rs2364281	0.002106
13	LINC01232	20	10000	100139215	100151560	9.60451	0.0170983	rs9517748	0.001941
16	DDX28	2	10000	68055176	68057770	6.99473	0.0170983	rs13816	0.008175
17	RNF213	323	10000	78234659	78372581	13.85	0.0170983	rs8068939	0.000198
19	PRR22	6	10000	5782970	5784776	7.89579	0.0170983	rs2446211	0.004955
2	EVX2	5	10000	176944834	176948690	8.37317	0.0170983	rs72919088	0.003808
2	HOXD-AS1	30	10000	177037916	177053686	9.5195	0.0170983	rs72916126	0.002033
5	N4BP3	25	10000	177540555	177553107	10.2164	0.0170983	rs3935147	0.001392
8	VCPIP1	41	10000	67542487	67579452	10.0676	0.0170983	rs61753692	0.001509
9	GBA2	8	10000	35736862	35749225	9.2176	0.0170983	rs3750434	0.002397
17	DDX52	37	10000	35969789	36003493	9.84818	0.0171983	rs12947529	0.0017
1	HSPB7	40	10000	16340522	16345285	9.45304	0.0171983	rs1048238	0.002108
3	RASA2	121	10000	141205925	141331197	10.4781	0.0171983	rs80255756	0.001208
16	FLJ26245	3	10000	34980922	34990995	7.34205	0.0172983	rs2405199	0.006736
19	ZNF416	8	10000	58082933	58090243	8.97967	0.0172983	rs73060436	0.00273
5	LINC00992	625	10000	116751207	116915439	14.436	0.0172983	rs62378108	0.000145
9	FAM205B	15	10000	34830263	34838583	8.9088	0.0172983	rs16931814	0.002838
12	ABCB9	24	10000	123405497	123451056	9.81388	0.0173983	rs4148856	0.001732
12	C12orf65	63	10000	123717843	123742506	9.69271	0.0173983	rs10846487	0.00185
19	ZNF57	57	10000	2900895	2918474	10.1411	0.0173983	rs4806887	0.00145
2	IL37	39	10000	113670547	113676458	8.6123	0.0173983	rs2708939	0.003339
6	CYP21A2_2	17	10000	32006092	32009447	10.3032	0.0173983	rs143212198	0.001328
6	LY6G6E	3	10000	31679752	31681842	7.66443	0.0173983	rs116401830	0.005632
2	LOC100505716	5	10000	28530557	28533326	7.95178	0.0174983	rs13031756	0.004804
3	TBL1XR1	384	10000	176738541	176915048	13.2064	0.0174983	rs117844782	0.000279
4	LOC728175	35	10000	185262183	185275130	11.0248	0.0174983	rs2871398	0.000899
4	SEC31A	144	10000	83739813	83812419	9.64662	0.0174983	rs13104805	0.001897
6	UTRN	944	10000	144612872	145174170	15.3954	0.0174983	rs12208679	8.72e-05
11	OR5D13	2	10000	55540913	55541858	6.89784	0.0175982	rs7124871	0.00863
12	ELK3	149	10000	96588206	96661606	13.3898	0.0176982	rs78405390	0.000253
1	GPR137B	141	10000	236305831	236372209	11.6242	0.0176982	rs36087647	0.000651
8	TSNARE1	654	10000	143293440	143484610	14.3227	0.0176982	rs8180995	0.000154
11	MPPED2	474	10000	30406039	30607930	13.9275	0.0178982	rs35695296	0.00019
22	NEFH	27	10000	29876180	29887277	10.4492	0.0178982	rs5763269	0.001227
8	MMP16	587	10000	89049459	89339717	14.6858	0.0178982	rs2664351	0.000127
11	ZDHHC24	11	10000	66306734	66313671	8.51309	0.0179982	rs11604824	0.003526
11	CYB5R2	40	10000	7686325	7694821	10.8499	0.0180982	rs72851388	0.000988
15	MAP2K5	511	10000	67835020	68099455	13.1997	0.0180982	rs938875	0.00028
1	FAM131C	42	10000	16384263	16400127	10.2045	0.0180982	rs9442236	0.001401
5	GM2A	49	10000	150632612	150649953	10.7964	0.0180982	rs2277029	0.001017
8	COX6C	39	10000	100890222	100906242	10.2579	0.0180982	rs1130569	0.001361
10	SH2D4B	419	10000	82297657	82406316	14.1928	0.0181982	rs7097741	0.000165
14	FBXO33	86	10000	39865576	39901704	10.974	0.0181982	rs34785385	0.000924
14	SEC23A	158	10000	39501122	39572437	11.8617	0.0181982	rs56034205	0.000573
17	LOC728392	6	10000	5402746	5404319	8.52604	0.0181982	rs28692633	0.003501
1	FAAH	28	10000	46859938	46879520	10.0603	0.0181982	rs1150067	0.001515
8	PTK2B	389	10000	27168998	27316908	13.4197	0.0181982	rs11782673	0.000249
14	IPO4	14	10000	24649424	24658124	9.46789	0.0182982	rs1543518	0.002091
12	ACSS3	530	10000	81471808	81649582	13.869	0.0183982	rs2574735	0.000196
16	MLKL	60	10000	74705752	74734789	11.3986	0.0183982	rs7197388	0.000735
20	SCRT2	25	10000	642239	656823	10.6613	0.0183982	rs78288000	0.001094
5	HMGXB3	114	10000	149380168	149432706	10.835	0.0183982	rs4705106	0.000996
12	POP5	10	10000	121016847	121019201	8.28791	0.0184982	rs509445	0.003991
2	LOC101927661	73	10000	67440539	67471706	11.9585	0.0184982	rs114518292	0.000544
4	EVC2	467	10000	5564145	5711275	14.7309	0.0184982	rs7696114	0.000124
21	C21orf128	30	10000	43522243	43528644	9.42369	0.0185981	rs11702347	0.002142
5	CTB-113P19.1	19	10000	151056505	151067468	10.4046	0.0185981	rs2881558	0.001257
7	OGDH	180	10000	44646120	44748669	11.8199	0.0185981	rs17133935	0.000586
12	ERBB3	24	10000	56473808	56497291	9.74818	0.0186981	rs773116	0.001795
16	CORO7	109	10000	4404542	4466962	11.6852	0.0186981	rs3747577	0.00063
5	ERBB2IP	122	10000	65222381	65376851	11.8041	0.0186981	rs37235	0.000591
12	CLEC12B	21	10000	10163230	10171399	10.0421	0.0187981	rs1323458	0.00153
14	LINC00221	7	10000	106938444	106951529	7.69252	0.0187981	rs7143373	0.005545
16	CHTF8	20	10000	69151911	69166493	9.49707	0.0187981	rs79051270	0.002058
1	CDKN2C	7	10000	51434366	51440309	7.52555	0.0187981	rs66462949	0.006083
7	TRY2P	28	10000	141968100	141972068	8.22883	0.0187981	rs2001012	0.004123
15	LCMT2	4	10000	43619973	43622820	7.70428	0.0188981	rs3742970	0.005509
14	EIF2B2	7	10000	75469611	75476294	7.00902	0.0189981	rs175043	0.00811
15	REC114	180	10000	73735498	73852353	10.984	0.0189981	rs62015527	0.000919
16	NTAN1	27	10000	15131709	15149936	8.58523	0.0189981	rs62039480	0.003389
19	CACNG6	47	10000	54494402	54515920	10.4149	0.0189981	rs459247	0.00125
12	MVK	62	10000	110011499	110035071	10.7782	0.0190981	rs68024411	0.001027
16	ZNF205-AS1	10	10000	3160460	3165599	8.12828	0.0190981	rs142169352	0.004358
17	ODF4	29	10000	8243187	8249363	9.42369	0.0190981	rs58424138	0.002142
1	C1orf200	4	10000	9712667	9714644	7.39432	0.0190981	rs4240895	0.006543
5	CTB-178M22.2	5	10000	167656587	167659377	7.53178	0.0190981	rs1008746	0.006062
5	GABRA6	39	10000	161112657	161129598	9.82453	0.0190981	rs79802786	0.001722
7	CREB5	1507	10000	28338939	28865511	16.8061	0.0190981	rs4719939	4.14e-05
17	NR1D1	14	10000	38249036	38256978	9.32539	0.0191981	rs883871	0.00226
19	SYDE1	10	10000	15218213	15225789	7.74505	0.0191981	rs12359	0.005386
20	LOC101926889	34	10000	25165307	25177528	9.57821	0.0191981	rs6050421	0.001969
22	MICAL3	856	10000	18270415	18507325	15.2395	0.0191981	rs2542338	9.47e-05
3	IQSEC1	445	10000	12938541	13114617	14.8566	0.0191981	rs115610155	0.000116
11	HTR3B	100	10000	113775517	113817283	11.7636	0.0192981	rs1176756	0.000604
12	BRAP	28	10000	112079949	112123790	9.89976	0.0192981	rs10774634	0.001653
17	GGT6	8	10000	4460221	4463891	8.30115	0.0192981	rs7216474	0.003962
2	BAZ2B_1	755	10000	160175489	160473112	14.6563	0.0192981	rs3755427	0.000129
3	SPINK8	37	10000	48348335	48369831	7.70264	0.0192981	rs115979122	0.005514
4	LINC00682	10	10000	41881538	41884628	8.3085	0.0192981	rs4861149	0.003946
11	BTBD10	171	10000	13409555	13484838	11.2787	0.0193981	rs149771106	0.000784
11	MIR4697HG	6	10000	133766329	133771635	8.48544	0.0193981	rs4936211	0.00358
19	OR7D2	5	10000	9296269	9299493	8.00183	0.0193981	rs56246934	0.004673
1	TMEM56	314	10000	95558072	95663161	13.5605	0.0193981	rs6686139	0.000231
2	CYP26B1	25	10000	72356366	72374991	9.3165	0.0194981	rs10197528	0.002271
2	ZC3H8	30	10000	112973438	113012664	9.43313	0.0194981	rs4849057	0.002131
3	GBE1	401	10000	81538849	81810950	12.8582	0.0194981	rs78452316	0.000336
10	DDIT4	2	10000	74033676	74035797	5.69452	0.019598	rs8316	0.017018
10	IDI2-AS1	57	10000	1068576	1090141	10.1732	0.019598	rs12269003	0.001425
10	PLA2G12B	6	10000	74694937	74714510	7.77412	0.019598	rs12257692	0.0053
11	IL18BP	5	10000	71709957	71713965	7.94389	0.019598	rs55992367	0.004825
18	STARD6	69	10000	51851061	51880943	10.0421	0.019598	rs117741213	0.00153
4	RELL1	308	10000	37592421	37687999	13.8217	0.019598	rs2135559	0.000201
8	TMEM71	149	10000	133722191	133772914	11.3194	0.019598	rs74462621	0.000767
11	IGSF9B	127	10000	133778519	133826649	12.9613	0.019698	rs513582	0.000318
12	KCTD10	118	10000	109886459	109915155	10.976	0.019698	rs66539960	0.000923
13	NALCN	1174	10000	101706129	102068813	15.8685	0.019698	rs560750	6.79e-05
16	CPNE2	200	10000	57126454	57181878	13.1534	0.019698	rs8046191	0.000287
3	B3GALNT1	37	10000	160801670	160823160	9.65244	0.019698	rs13071892	0.001891
19	KLF2	6	10000	16435650	16438339	8.39962	0.019798	rs7248864	0.003753
3	ABCC5	214	10000	183637723	183735727	11.7544	0.019798	rs35621685	0.000607
13	MCF2L	427	10000	113623534	113754053	14.0396	0.019898	rs2993291	0.000179
19	ZNF776	15	10000	58258163	58269527	9.23294	0.019898	rs60751243	0.002377
22	VPREB1	5	10000	22599199	22599926	7.70789	0.019898	rs1320	0.005498
5	CREBRF	177	10000	172483354	172566291	11.6443	0.019898	rs3131914	0.000644
7	NME8	252	10000	37888198	37940002	12.5939	0.019998	rs10226308	0.000387
9	CDC37L1	63	10000	4679565	4706594	9.58475	0.019998	rs10114246	0.001962
17	SHBG	35	10000	7517381	7536701	10.4032	0.020098	rs72829408	0.001258
3	ITGB5	361	10000	124481794	124606144	12.5988	0.020098	rs3772840	0.000386
6	KHDC3L	5	10000	74072399	74073898	7.63678	0.020098	rs2295761	0.005719
9	CACFD1	27	10000	136325086	136335909	9.38055	0.020198	rs4962051	0.002193
20	ROMO1	3	10000	34287231	34288902	6.48481	0.020298	rs6060567	0.01088
1	SH3D21	10	10000	36771993	36786948	8.63757	0.020398	rs10908297	0.003293
2	LINC00299	580	10000	8147900	8468549	14.3597	0.020398	rs367023	0.000151
6	KIAA0408	34	10000	127759550	127780535	9.21454	0.020398	rs6934679	0.002401
11	TALDO1	22	10000	747431	765024	9.86667	0.020498	rs113298336	0.001683
12	CASC1	277	10000	25261222	25348094	11.7605	0.020498	rs4441109	0.000605
16	CTCF	63	10000	67596309	67673088	9.52311	0.020498	rs143837268	0.002029
2	CMPK2	9	10000	6980683	7006766	7.86503	0.020498	rs6758745	0.00504
9	LINC00583	58	10000	13927969	13945606	10.2511	0.020498	rs2382427	0.001366
19	ZNF772	29	10000	57980953	57988938	8.17379	0.0205979	rs2360765	0.00425
1	NRAS	11	10000	115247084	115259515	8.12081	0.0205979	rs148827219	0.004376
22	UQCR10	5	10000	30163357	30166402	7.79849	0.0205979	rs140135	0.005229
4	RNF212	152	10000	1065265	1107352	10.7675	0.0205979	rs184018748	0.001033
6	BRPF3	35	10000	36164549	36200567	10.0087	0.0205979	rs9470233	0.001558
17	MRPL12	15	10000	79670399	79674556	9.00325	0.0206979	rs10560	0.002695
19	CD320	35	10000	8367010	8373240	8.54486	0.0206979	rs250512	0.003465
2	WDR12	64	10000	203745322	203776949	10.7982	0.0206979	rs72936852	0.001016
11	PTPRJ	302	10000	48002109	48192394	12.5843	0.0207979	rs11039482	0.000389
19	KCTD15	34	10000	34287750	34306666	10.5998	0.0207979	rs73039061	0.001131
20	MC3R	2	10000	54823787	54824871	5.54477	0.0207979	rs3746619	0.018536
2	CDK15	169	10000	202671151	202760273	12.8863	0.0207979	rs113141681	0.000331
3	AADAC	78	10000	151531860	151546276	10.1796	0.0207979	rs13070603	0.00142
17	EFCAB3	53	10000	60447578	60493839	10.2825	0.0209979	rs9913294	0.001343
19	DOT1L	171	10000	2164147	2232577	12.3971	0.0209979	rs2301797	0.00043
20	SEC23B	155	10000	18488187	18542059	11.5596	0.0209979	rs116883772	0.000674
20	AURKA	31	10000	54944444	54967351	10.4105	0.0211979	rs6099126	0.001253
4	IGFBP7	414	10000	57897236	57976551	14.0187	0.0211979	rs11133472	0.000181
11	SPTBN2	22	10000	66452719	66488870	10.4432	0.0212979	rs118014573	0.001231
19	DOHH	14	10000	3490818	3500938	7.62671	0.0212979	rs2286440	0.005751
22	BCR	345	10000	23522551	23660224	13.0272	0.0212979	rs75677085	0.000307
11	HBG1	3	10000	5269501	5271087	7.02699	0.0213979	rs2187608	0.008029
17	PCTP	78	10000	53828339	53854748	9.33352	0.0213979	rs75645350	0.00225
5	ZBED3-AS1	150	10000	76382622	76444176	12.7085	0.0213979	rs28589776	0.000364
14	HOMEZ	16	10000	23742843	23755309	8.72196	0.0214979	rs10133795	0.003144
19	BRSK1	71	10000	55795533	55823903	11.0002	0.0214979	rs117215305	0.000911
10	IDI2	28	10000	1064846	1071799	9.37054	0.0215978	rs1044261	0.002205
11	OR5D18	2	10000	55587105	55588047	6.49267	0.0215978	rs7948629	0.010832
12	PTPN6	13	10000	7055739	7070479	8.89981	0.0215978	rs759052	0.002852
17	C17orf74	3	10000	7328934	7330886	7.16717	0.0215978	rs72842820	0.007425
6	HIST1H3C	3	10000	26045638	26046097	7.23489	0.0215978	rs3752418	0.00715
9	PAX5	678	10000	36833271	37034476	14.671	0.0215978	rs874411	0.000128
12	SBNO1	176	10000	123773655	123834988	10.4903	0.0216978	rs73231956	0.0012
7	PRSS58	33	10000	141951957	141957878	8.42155	0.0216978	rs1547388	0.003708
9	PRRC2B	119	10000	134305476	134375575	11.2068	0.0216978	rs2994066	0.000815
1	LOC644961	5	10000	27650364	27653016	7.56266	0.0217978	rs80088173	0.005959
3	SGOL1-AS1	44	10000	20215735	20227919	9.29404	0.0217978	rs140520229	0.002299
9	OR13J1	2	10000	35869459	35870398	6.41156	0.0217978	rs7044405	0.011338
2	NAGK	28	10000	71295407	71305998	9.79802	0.0219978	rs2241264	0.001747
5	GAPT	4	10000	57787329	57792185	7.07929	0.0219978	rs10051454	0.007798
7	CREB3L2	256	10000	137559724	137686847	12.8919	0.0219978	rs273946	0.00033
7	H2AFV	47	10000	44866487	44887725	9.96436	0.0219978	rs117833461	0.001596
17	HOXB3	49	10000	46626231	46651810	10.334	0.0220978	rs11652860	0.001306
17	PDK2	47	10000	48172100	48188733	9.73492	0.0220978	rs7221362	0.001808
22	DNAJB7	3	10000	41255553	41258130	7.06146	0.0220978	rs103197	0.007876
5	TEX43	12	10000	125967413	125971974	7.51905	0.0220978	rs35726580	0.006105
1	AKIRIN1	46	10000	39456915	39471737	9.53856	0.0221978	rs10888609	0.002012
22	EP300	115	10000	41488613	41576081	11.2459	0.0221978	rs9611510	0.000798
2	SPRED2	315	10000	65537984	65659656	12.6779	0.0221978	rs4371349	0.00037
2	TMEM131	412	10000	98372800	98612354	11.5902	0.0221978	rs141837704	0.000663
9	NPR2	25	10000	35792405	35809728	8.66096	0.0221978	rs7031237	0.003251
11	OR5M9	6	10000	56229944	56230877	5.23075	0.0222978	rs61902869	0.022191
7	CNOT4	204	10000	135046546	135194875	12.2875	0.0222978	rs13309829	0.000456
19	LOC101929144	13	10000	23237624	23244067	8.95639	0.0223978	rs73027682	0.002765
1	FLJ31662	6	10000	95940292	95944912	8.17764	0.0223978	rs7417574	0.004241
3	ROBO1	2237	10000	78646387	79817059	16.0497	0.0223978	rs6548595	6.17e-05
17	EZH1	26	10000	40852292	40897071	8.2087	0.0224978	rs4792952	0.004169
3	NGLY1	92	10000	25760434	25831530	9.01345	0.0224978	rs7431653	0.00268
19	ZNF671	17	10000	58231118	58238995	9.46351	0.0225977	rs113739340	0.002096
3	ZIC1	7	10000	147127180	147134506	8.35371	0.0225977	rs116328717	0.003849
6	OR12D2	8	10000	29364415	29365448	6.65424	0.0225977	rs114787733	0.009892
9	FBXW5	4	10000	139834884	139839206	6.63258	0.0225977	rs7859131	0.010013
2	HNRNPLL	62	10000	38790327	38830178	10.3827	0.0227977	rs7573095	0.001272
8	LRRC6	118	10000	133584200	133687863	11.1573	0.0227977	rs76505047	0.000837
10	METTL10	46	10000	126447405	126480439	9.36971	0.0228977	rs4962700	0.002206
11	OR52E4	7	10000	5905522	5906461	6.80604	0.0228977	rs11823842	0.009085
17	NT5C3B	38	10000	39981333	39992523	8.94454	0.0228977	rs1836879	0.002783
3	RNF7	22	10000	141457050	141465645	8.36413	0.0228977	rs16851720	0.003827
13	LINC01049	153	10000	91145541	91187595	10.2417	0.0229977	rs76545914	0.001373
17	MED24	56	10000	38175349	38210889	9.92104	0.0229977	rs6503533	0.001634
19	HNRNPM	116	10000	8509802	8554002	10.4238	0.0229977	rs142420198	0.001244
9	SH2D3C	79	10000	130500595	130541048	10.3683	0.0229977	rs142611303	0.001282
12	NAA25	62	10000	112464492	112546635	10.1411	0.0230977	rs2339941	0.00145
12	UBE3B	142	10000	109915427	109974510	10.9422	0.0230977	rs73196264	0.00094
12	USP44	97	10000	95910335	95945263	11.8073	0.0230977	rs7310029	0.00059
13	KIAA0226L	105	10000	46916134	46964177	9.40072	0.0230977	rs727487	0.002169
16	FOXF1	12	10000	86544132	86548070	9.15013	0.0230977	rs77694119	0.002487
20	MMP24	77	10000	33814538	33864804	10.7873	0.0230977	rs2425038	0.001022
8	PPP1R3B	41	10000	8993763	9009152	9.72883	0.0230977	rs330925	0.001814
7	ZNRF2P2	6	10000	29724387	29725437	7.30195	0.0231977	rs71528579	0.006888
12	MYO1H	280	10000	109826523	109886176	11.878	0.0232977	rs73194230	0.000568
16	TVP23A	47	10000	10860532	10912621	10.8018	0.0232977	rs8051032	0.001014
18	NARS	64	10000	55267893	55289177	10.3553	0.0232977	rs17753056	0.001291
19	FAM187B	12	10000	35715703	35719628	8.76956	0.0232977	rs55877896	0.003063
20	TGM6	179	10000	2361553	2413399	11.5187	0.0232977	rs2422771	0.000689
4	NUDT6	96	10000	123813798	123844159	9.82026	0.0232977	rs62323500	0.001726
10	ACSL5	86	10000	114133915	114188138	10.0959	0.0233977	rs4439448	0.001486
16	TFAP4	19	10000	4307186	4323001	8.69834	0.0233977	rs251738	0.003185
17	SLC25A10	33	10000	79679265	79688046	9.44176	0.0233977	rs12452231	0.002121
17	THRA	42	10000	38218445	38250120	10.1835	0.0233977	rs3744805	0.001417
12	C12orf43	53	10000	121440224	121454305	10.231	0.0234977	rs3751152	0.001381
16	CLUAP1	64	10000	3550944	3589051	10.5803	0.0234977	rs17794023	0.001143
7	LRRC72	180	10000	16566504	16621114	12.3081	0.0236976	rs6969347	0.000451
11	GAL	9	10000	68451982	68458643	8.35041	0.0237976	rs3136539	0.003856
1	FAM177B	9	10000	222910557	222924002	8.10884	0.0237976	rs2378607	0.004405
8	ZNF596	40	10000	182136	197340	9.93688	0.0237976	rs17744517	0.00162
11	LOC100133315	247	10000	71576554	71639493	10.0713	0.0238976	rs189758387	0.001506
11	SYTL2	246	10000	85405264	85522202	12.2998	0.0238976	rs17744227	0.000453
12	KRAS	141	10000	25357722	25403865	11.0899	0.0238976	rs10842508	0.000868
18	TRAPPC8	243	10000	29409135	29523091	11.366	0.0238976	rs112450192	0.000748
22	LOC284933	22	10000	48934711	48943199	8.75532	0.0238976	rs73173405	0.003087
1	TMEM240	5	10000	1470157	1475740	6.18031	0.0239976	rs1571150	0.012918
10	ADK	704	10000	75910942	76469061	12.3122	0.0240976	rs10762631	0.00045
12	PTPN11	57	10000	112856535	112947717	10.4076	0.0240976	rs3741983	0.001255
12	SP7	5	10000	53720359	53730004	6.5342	0.0240976	rs2016266	0.010582
16	ZNF205	14	10000	3162562	3170518	8.06735	0.0240976	rs146087418	0.004507
19	CD3EAP	16	10000	45909466	45914024	8.39816	0.0240976	rs2336219	0.003756
3	COL6A6	169	10000	130279177	130395888	11.4395	0.0240976	rs7614116	0.000719
4	IL2	6	10000	123372625	123377650	7.74136	0.0240976	rs56239914	0.005397
12	LIN7A	379	10000	81191170	81331694	12.5275	0.0241976	rs11114635	0.000401
17	HS3ST3A1	382	10000	13399005	13505244	13.7394	0.0241976	rs12450600	0.00021
2	WDR43	163	10000	29117532	29171080	11.2482	0.0241976	rs6745598	0.000797
19	ZNF256	8	10000	58452200	58459077	7.38829	0.0242976	rs257653	0.006565
4	THAP9	28	10000	83821836	83841284	7.2704	0.0242976	rs11731547	0.00701
7	SGCE	85	10000	94214535	94285521	10.1297	0.0242976	rs9641141	0.001459
12	GLIPR1L1	59	10000	75728462	75764169	9.20997	0.0243976	rs4491265	0.002407
13	COL4A1	650	10000	110801309	110959496	14.8404	0.0243976	rs13260	0.000117
1	IPP	97	10000	46159997	46216485	10.4583	0.0243976	rs28719889	0.001221
21	DSCAM	2749	10000	41384342	42219039	16.999	0.0243976	rs2222998	3.74e-05
5	PPWD1	68	10000	64859062	64883376	10.1706	0.0243976	rs113057113	0.001427
12	LOC102724663	73	10000	81672967	81706201	10.7162	0.0244976	rs7962530	0.001062
16	SNTB2	207	10000	69221049	69342955	11.6588	0.0244976	rs117028630	0.000639
5	PGGT1B	98	10000	114546526	114598569	10.3668	0.0244976	rs72813817	0.001283
7	SBDS	9	10000	66452689	66460588	7.94764	0.0244976	rs6971508	0.004815
17	TTC25	42	10000	40086875	40117668	9.52583	0.0245975	rs8078141	0.002026
20	MCTS2P	2	10000	30135184	30136019	6.3269	0.0245975	rs1115713	0.011892
21	WDR4	173	10000	44263189	44299699	11.5295	0.0245975	rs458878	0.000685
3	PIK3R4	101	10000	130397777	130465696	9.30523	0.0245975	rs1719071	0.002285
6	BYSL	19	10000	41888964	41900784	9.06815	0.0245975	rs10947996	0.002601
7	GPR22	7	10000	107110501	107116125	7.72239	0.0245975	rs17481621	0.005454
12	CDK2AP1	26	10000	123745516	123756863	8.93342	0.0246975	rs4759416	0.0028
11	PRDX5	3	10000	64085559	64089295	7.0747	0.0247975	rs1047206	0.007818
11	SPATA19	20	10000	133710516	133715433	8.23899	0.0247975	rs2723605	0.0041
12	FAM216A	29	10000	110906231	110928192	9.41089	0.0247975	rs7963504	0.002157
11	PTPRCAP	2	10000	67202980	67205153	5.84245	0.0248975	rs67501657	0.015644
17	IGF2BP1	90	10000	47074773	47133507	10.8878	0.0248975	rs9906944	0.000968
22	ZMAT5	111	10000	30126944	30162969	10.4283	0.0248975	rs196735	0.001241
1	LOC101929099	114	10000	117568103	117602112	11.4447	0.0249975	rs3820495	0.000717
22	CSF2RB	110	10000	37309674	37336479	10.9441	0.0249975	rs1801117	0.000939
8	RAD21-AS1	5	10000	117886662	117889107	7.7646	0.0249975	rs17426060	0.005328
12	ESPL1	38	10000	53662082	53687427	9.77397	0.0250975	rs35969387	0.00177
14	FKBP3	11	10000	45584801	45603732	7.06624	0.0250975	rs3783700	0.007855
19	ZNF600	12	10000	53268747	53290034	8.153	0.0250975	rs1559239	0.004299
2	LOC101929512	32	10000	162079768	162111154	10.1551	0.0250975	rs35662329	0.001439
12	LOC101928530	3	10000	133464427	133465157	6.36718	0.0251975	rs28372675	0.011625
12	PPFIBP1	525	10000	27677044	27848497	14.0821	0.0251975	rs117902081	0.000175
17	ADAP2	13	10000	29248753	29286211	8.67108	0.0253975	rs11868576	0.003233
1	ARNT	63	10000	150782180	150849244	9.76671	0.0253975	rs11204735	0.001777
1	SMIM12	18	10000	35315962	35325417	8.99648	0.0253975	rs4652864	0.002705
2	LOC101927482	9	10000	197124747	197128928	7.7714	0.0253975	rs11894150	0.005308
19	ZNF135	25	10000	58570606	58581110	9.14426	0.0254975	rs7256947	0.002495
7	CFTR	267	10000	117120016	117308718	11.6213	0.0254975	rs77540407	0.000652
1	CD58	38	10000	117057155	117113715	8.96833	0.0255974	rs7534533	0.002747
22	SGSM3	44	10000	40766594	40806293	9.31488	0.0255974	rs76075068	0.002273
14	GPR132	18	10000	105515725	105531887	7.82109	0.0256974	rs3803322	0.005164
11	LOC441601	33	10000	50238998	50257633	8.96833	0.0257974	rs4881690	0.002747
3	SACM1L	189	10000	45730753	45786900	10.5012	0.0257974	rs145316545	0.001193
6	FBXL4	115	10000	99321600	99395882	10.3539	0.0257974	rs2604068	0.001292
17	MPO	13	10000	56347216	56358296	9.15529	0.0258974	rs34704261	0.00248
4	FBXW7_1	325	10000	153242409	153456185	10.3726	0.0258974	rs75940252	0.001279
15	SPTBN5	139	10000	42140343	42186275	11.9653	0.0259974	rs890503	0.000542
17	ACLY	89	10000	40023178	40075272	10.0885	0.0259974	rs4796727	0.001492
17	TANC2	520	10000	61086897	61505067	12.3247	0.0259974	rs239362	0.000447
19	CILP2	15	10000	19649073	19657468	7.09429	0.0259974	rs8102502	0.007733
11	BACE1-AS	3	10000	117162061	117162857	6.5499	0.0261974	rs45619137	0.010489
13	FARP1	1046	10000	98794815	99102027	15.6013	0.0261974	rs285098	7.82e-05
3	LIMD1	299	10000	45636322	45722755	11.9653	0.0261974	rs115065137	0.000542
3	LSMEM2	4	10000	50316517	50325545	6.87991	0.0261974	rs112911401	0.008717
8	PTDSS1	112	10000	97274113	97346779	10.7443	0.0261974	rs10955071	0.001046
5	IRX2	3	10000	2746278	2751769	6.826	0.0262974	rs11432	0.008984
15	SNRPA1	34	10000	101821714	101835460	8.45621	0.0263974	rs34314457	0.003638
16	XYLT1	1030	10000	17196180	17564738	15.6062	0.0264974	rs12596741	7.8e-05
9	FAM102A	78	10000	130702860	130742812	9.01072	0.0264974	rs1571140	0.002684
13	EDNRB	185	10000	78469615	78549664	10.8707	0.0265973	rs141078626	0.000977
14	FAM71D	96	10000	67656109	67695267	10.0087	0.0265973	rs11158653	0.001558
17	NPLOC4	302	10000	79523912	79604138	10.978	0.0265973	rs12453042	0.000922
1	DLGAP3	40	10000	35331036	35370984	10.3755	0.0265973	rs61776348	0.001277
2	IL1B	12	10000	113587336	113594356	8.25187	0.0265973	rs1143642	0.004071
8	ANGPT1	776	10000	108261709	108510254	13.898	0.0265973	rs34397043	0.000193
10	CTBP2	618	10000	126676417	126849624	14.3473	0.0266973	rs12246653	0.000152
19	ZIK1	12	10000	58095627	58103758	7.69285	0.0266973	rs2074205	0.005544
3	CSRNP1	26	10000	39183341	39195102	9.50691	0.0266973	rs13084580	0.002047
3	LINC01205	149	10000	109128836	109214014	10.6715	0.0266973	rs1483528	0.001088
11	UBQLNL	8	10000	5535622	5537956	6.29718	0.0267973	rs2047456	0.012093
14	ACYP1	13	10000	75519927	75530736	7.18465	0.0267973	rs175510	0.007353
2	FSIP2	197	10000	186603354	186698016	10.3755	0.0267973	rs12999160	0.001277
5	FAM105A	35	10000	14581890	14616287	9.20011	0.0267973	rs42411	0.00242
14	DACT1	23	10000	59100785	59115038	8.79595	0.0268973	rs464582	0.003019
5	LOC100133050	5	10000	99715208	99723958	7.28999	0.0268973	rs2617333	0.006934
7	RNF216P1	100	10000	5013615	5037800	11.1006	0.0268973	rs56223615	0.000863
1	PTPN7	20	10000	202116140	202130716	9.68776	0.0269973	rs79109068	0.001855
8	PVT1	672	10000	128902873	129113499	14.436	0.0269973	rs72720891	0.000145
17	SPOP	70	10000	47676245	47755525	10.96	0.0270973	rs7221354	0.000931
4	GABRA4	220	10000	46920916	46996424	11.6071	0.0270973	rs17641660	0.000657
4	SPARCL1	178	10000	88394481	88450655	11.1485	0.0270973	rs35092607	0.000841
18	PMAIP1	7	10000	57567191	57571538	8.26036	0.0271973	rs7240884	0.004052
19	OR7G1	6	10000	9225503	9226439	7.33645	0.0271973	rs7246980	0.006757
19	PNMAL1	29	10000	46969747	46974820	9.26951	0.0271973	rs150105159	0.00233
1	DAB1-AS1	4	10000	58326214	58328786	5.89685	0.0271973	rs17519798	0.015168
20	GNAS	154	10000	57414794	57486250	12.2631	0.0271973	rs146689440	0.000462
20	NOL4L	180	10000	31030861	31172875	11.0248	0.0271973	rs6119267	0.000899
5	ADAMTS6	671	10000	64444562	64777704	13.7847	0.0271973	rs187021581	0.000205
15	NPTN	109	10000	73852343	73925753	9.93121	0.0272973	rs7169976	0.001625
6	EEF1E1-BLOC1S5	299	10000	8013799	8102828	11.6911	0.0272973	rs12529901	0.000628
4	TLR1	30	10000	38797875	38806412	8.64645	0.0273973	rs5743586	0.003277
9	KIAA2026	194	10000	5919007	6008003	11.4866	0.0273973	rs73389003	0.000701
10	C10orf32	23	10000	104613966	104624718	9.40072	0.0274973	rs10786715	0.002169
10	CYP2C19	233	10000	96522462	96612671	10.8783	0.0274973	rs12768009	0.000973
16	LOC100131303	2	10000	68047338	68049814	5.95627	0.0274973	rs8047119	0.014665
19	LILRB1	125	10000	55128383	55148981	10.5965	0.0274973	rs1061684	0.001133
3	C3orf83	13	10000	12581279	12586963	8.2541	0.0274973	rs12496109	0.004066
11	LRTOMT	49	10000	71791376	71821828	7.90604	0.0275972	rs77510445	0.004927
13	BIVM	121	10000	103451398	103493888	10.9012	0.0275972	rs61966043	0.000961
13	FRY-AS1	7	10000	32598195	32605776	7.05941	0.0275972	rs77420175	0.007885
16	CMTM1	22	10000	66600293	66613038	7.97797	0.0275972	rs896086	0.004735
16	DPEP2	12	10000	68021292	68033421	7.75311	0.0275972	rs113731015	0.005362
19	ZNF8	52	10000	58790317	58807254	9.416	0.0275972	rs11672773	0.002151
20	LOC101927770	106	10000	52169308	52191847	10.7373	0.0275972	rs2741401	0.00105
15	ZWILCH	126	10000	66797420	66841822	10.4613	0.0276972	rs74894249	0.001219
22	CABP7	31	10000	30116343	30127820	9.71068	0.0276972	rs140092	0.001832
12	RASSF8	471	10000	26111963	26232825	12.4058	0.0277972	rs28660588	0.000428
14	PRPF39	35	10000	45553301	45584804	7.35679	0.0278972	rs117107185	0.006681
3	KPNA4	110	10000	160212782	160283376	10.0627	0.0278972	rs62272804	0.001513
8	PSD3	2301	10000	18384812	18871196	16.4595	0.0278972	rs59239262	4.97e-05
4	DSPP	21	10000	88529680	88538025	9.02852	0.0279972	rs2736980	0.002658
5	PSD2	67	10000	139175405	139224048	9.99695	0.0279972	rs7700395	0.001568
12	MRPL51	8	10000	6601315	6602471	6.79292	0.0280972	rs1001127	0.009152
15	CAPN3	64	10000	42651697	42704515	9.88094	0.0280972	rs1801449	0.00167
1	BCAS2	24	10000	115110180	115124265	9.26951	0.0280972	rs6671190	0.00233
3	TRPC1	140	10000	142443265	142526729	10.3242	0.0280972	rs62278494	0.001313
5	MTRR	159	10000	7869216	7901235	10.9245	0.0280972	rs138990687	0.000949
12	GALNT4	10	10000	89913189	89918583	7.51521	0.0281972	rs10858894	0.006118
1	TSPAN1	10	10000	46640748	46651634	8.05533	0.0281972	rs12030928	0.004537
1	VPS13D	216	10000	12290112	12572098	11.4087	0.0281972	rs71647039	0.000731
11	CLCF1	16	10000	67131638	67141648	8.22707	0.0282972	rs12788752	0.004127
11	ESRRA	7	10000	64072999	64084212	7.42679	0.0282972	rs11600990	0.006426
12	NR2C1	111	10000	95414004	95467404	10.6749	0.0282972	rs11107868	0.001086
19	NDUFS7	27	10000	1383882	1395588	8.44425	0.0282972	rs809359	0.003662
8	FLJ42969	28	10000	102064281	102088479	9.11588	0.0282972	rs3019259	0.002534
10	ZDHHC6	24	10000	114190057	114206672	8.60903	0.0283972	rs12355831	0.003345
16	PDZD9	10	10000	21995185	22012431	7.91598	0.0283972	rs9934359	0.0049
5	FLJ32255	21	10000	42985500	42993435	8.68125	0.0283972	rs10064089	0.003215
1	FMO1	93	10000	171217609	171255117	10.966	0.0284972	rs12141555	0.000928
5	BTNL3	23	10000	180415844	180433727	8.72196	0.0284972	rs55823201	0.003144
6	ARMC2	285	10000	109169618	109295675	12.039	0.0284972	rs12194690	0.000521
7	CDHR3	192	10000	105603656	105676877	12.509	0.0284972	rs6960586	0.000405
8	R3HCC1	40	10000	23145611	23153792	9.24375	0.0284972	rs117005408	0.002363
9	ZNF510	20	10000	99518146	99540328	6.80427	0.0284972	rs73552429	0.009094
10	TNKS2-AS1	19	10000	93542595	93558048	8.09694	0.0285971	rs7911346	0.004434
1	LGR6	277	10000	202163117	202288889	12.6578	0.0285971	rs2924103	0.000374
2	TPO	501	10000	1417232	1546499	13.2131	0.0286971	rs115781609	0.000278
7	LRGUK	322	10000	133812104	133948933	11.4472	0.0286971	rs2544172	0.000716
16	CHST6	39	10000	75507021	75528926	9.94828	0.0287971	rs3115960	0.00161
19	C19orf47	58	10000	40826966	40854434	9.68875	0.0287971	rs62107628	0.001854
12	HRK	19	10000	117298224	117319232	8.38707	0.0288971	rs4767465	0.003779
15	CT62	8	10000	71402582	71407839	5.9043	0.0288971	rs7178344	0.015104
16	C16orf96	66	10000	4606490	4650318	9.35317	0.0288971	rs7205141	0.002226
3	PSMD6	30	10000	63996224	64009686	9.51139	0.0288971	rs66473811	0.002042
12	KIF5A	37	10000	57943846	57978554	9.62258	0.0289971	rs775245	0.001922
2	ANKRD44-IT1	145	10000	198115581	198167243	10.8294	0.0289971	rs6727480	0.000999
6	PHF3	88	10000	64345706	64425418	9.54495	0.0289971	rs79846048	0.002005
10	SKIDA1	6	10000	21802408	21814611	6.91136	0.0290971	rs946711	0.008565
19	MBOAT7	35	10000	54677105	54693733	9.64275	0.0290971	rs7259361	0.001901
3	MASP1	198	10000	186933872	187009810	12.688	0.0290971	rs73191724	0.000368
4	DCAF4L1	8	10000	41983712	41988484	7.43774	0.0290971	rs2581439	0.006387
19	C19orf26	10	10000	1229946	1237990	7.04786	0.0291971	rs2890122	0.007936
20	LINC00028	3	10000	30073580	30075377	6.33347	0.0291971	rs80080420	0.011848
22	DRICH1	41	10000	23950638	23974508	9.91093	0.0292971	rs12484556	0.001643
2	EFHD1	204	10000	233470766	233547491	11.5624	0.0292971	rs113460456	0.000673
14	TRAPPC6B	61	10000	39617014	39639634	9.44695	0.0293971	rs2038359	0.002115
2	MIR7515HG	3	10000	6789238	6790651	6.7716	0.0293971	rs10192411	0.009262
6	HIST1H2AB	2	10000	26033319	26033796	5.74805	0.0293971	rs2230654	0.016507
6	MED20	19	10000	41873091	41888877	9.02714	0.0293971	rs6920559	0.00266
16	NFATC3	181	10000	68119268	68263162	9.97129	0.0294971	rs9939821	0.00159
1	FLVCR1-AS1	12	10000	213029945	213031480	6.66345	0.0294971	rs41296674	0.009841
1	KCNJ10	57	10000	160007256	160040051	10.6886	0.0294971	rs28548577	0.001078
1	SYTL1	22	10000	27668482	27680423	8.05453	0.0294971	rs145411679	0.004539
5	CANX	58	10000	179125929	179158639	9.47933	0.0294971	rs112123775	0.002078
4	CEP170P1	81	10000	119437494	119475359	9.97825	0.029597	rs62326203	0.001584
4	CPLX1	164	10000	778744	819945	12.3712	0.029697	rs116578450	0.000436
16	TMEM159	39	10000	21169911	21191937	9.56428	0.029797	rs12920126	0.001984
11	RCOR2	5	10000	63678692	63684316	6.27881	0.029897	rs320109	0.012219
12	GPN3	20	10000	110890290	110906526	8.83752	0.029897	rs78446569	0.002951
12	KCNC2	414	10000	75433857	75603528	12.1763	0.029897	rs56803992	0.000484
17	MMD	54	10000	53469973	53499341	9.21454	0.029897	rs2286806	0.002401
1	CHI3L1	30	10000	203148058	203155922	8.7179	0.029897	rs7542294	0.003151
2	NBEAL1	247	10000	203879601	204082717	11.7729	0.029897	rs72934556	0.000601
19	AP2A1	89	10000	50270179	50310369	10.1732	0.029997	rs12610882	0.001425
6	TRMT11	39	10000	126307575	126360420	8.525	0.029997	rs116913944	0.003503
10	RUFY2	111	10000	70100863	70167051	9.67492	0.030097	rs61857322	0.001868
11	OSBPL5	347	10000	3108345	3186582	13.3242	0.030097	rs118148180	0.000262
11	PPFIBP2	539	10000	7534995	7674996	14.0084	0.030097	rs10839832	0.000182
12	CEP83-AS1	3	10000	94853778	94856344	6.4403	0.030097	rs73218279	0.011156
14	C14orf132	199	10000	96505660	96560308	11.2882	0.030097	rs8021910	0.00078
19	TPGS1	10	10000	507496	519654	7.6686	0.030097	rs8106333	0.005619
20	CD93	10	10000	23059992	23066977	8.08553	0.030097	rs7492	0.004462
2	MALL	13	10000	110841446	110874143	7.20601	0.030097	rs12477779	0.007266
10	CDK1	51	10000	62538088	62554610	9.1873	0.030197	rs2448347	0.002437
14	EMC9	4	10000	24608173	24610797	6.63152	0.030197	rs8010715	0.010019
15	MYO9A	361	10000	72118360	72410440	10.9148	0.030197	rs12908659	0.000954
11	DCUN1D5	58	10000	102921412	102962944	10.2674	0.030297	rs117311757	0.001354
13	GPC6-AS2	90	10000	94470676	94510726	9.4126	0.030297	rs9301913	0.002155
10	ADD3	129	10000	111765725	111895323	10.7408	0.030397	rs12261598	0.001048
10	C10orf128	121	10000	50362768	50396445	11.4189	0.030397	rs2804930	0.000727
17	CNP	14	10000	40118758	40129754	8.4147	0.030397	rs4796751	0.003722
1	RAB3B	134	10000	52373627	52456436	10.6261	0.030397	rs75682658	0.001115
1	UBXN10	6	10000	20512577	20519942	7.48602	0.030397	rs45488303	0.006218
7	TECPR1	87	10000	97844754	97881563	9.80013	0.030397	rs2270603	0.001745
7	EPDR1	128	10000	37960162	37991542	11.3735	0.030497	rs10235774	0.000745
1	CACNA1E	689	10000	181452685	181775921	13.7394	0.0305969	rs55950030	0.00021
5	CHD1	133	10000	98190907	98262238	10.5371	0.0305969	rs2617507	0.00117
6	ELOVL4	88	10000	80624528	80657315	9.91766	0.0305969	rs9448857	0.001637
10	LINC00200	22	10000	1205707	1210612	8.87944	0.0306969	rs12570526	0.002884
11	LDHAL6A	47	10000	18477373	18501147	9.9586	0.0306969	rs12791114	0.001601
12	RNFT2	278	10000	117176095	117291436	12.1918	0.0306969	rs10047539	0.00048
3	PDCD10	58	10000	167401694	167452651	8.49512	0.0306969	rs116154329	0.003561
9	HMCN2	432	10000	133028157	133309510	13.869	0.0306969	rs1006615	0.000196
13	CTAGE10P	18	10000	50464544	50467516	9.09008	0.0307969	rs7316930	0.00257
21	LOC101928107	32	10000	34484009	34496006	9.35729	0.0307969	rs62226075	0.002221
11	OR4A16	4	10000	55110676	55111663	6.24336	0.0308969	rs7121804	0.012466
19	ZNF227	23	10000	44716680	44741421	8.44773	0.0308969	rs79833657	0.003655
3	DYNC1LI1	72	10000	32567462	32612366	9.48907	0.0308969	rs62252804	0.002067
4	FGFRL1	49	10000	1005609	1020686	9.40411	0.0308969	rs11734750	0.002165
8	HNF4G	97	10000	76452202	76479061	9.89754	0.0308969	rs2943611	0.001655
8	LOC100128993	254	10000	19041185	19103032	13.2678	0.0308969	rs148536964	0.00027
17	ETV4	30	10000	41605210	41623800	8.5276	0.0309969	rs75131734	0.003498
17	MAP2K6	250	10000	67410837	67538470	12.3205	0.0309969	rs817541	0.000448
6	SLC25A27	33	10000	46620651	46645927	9.39397	0.0309969	rs10498770	0.002177
8	CDCA2	106	10000	25316512	25365425	9.55045	0.0309969	rs62502024	0.001999
10	CALHM3	8	10000	105232560	105238997	7.29258	0.0310969	rs2860194	0.006924
12	LOC101928420	22	10000	81156932	81164494	8.42646	0.0310969	rs74645896	0.003698
2	MRPS5	10	10000	95752951	95787754	8.28882	0.0310969	rs116675189	0.003989
3	SETD5	114	10000	9439383	9519838	9.89754	0.0310969	rs7631372	0.001655
11	UBQLN3	6	10000	5528529	5531153	7.64976	0.0311969	rs114824484	0.005678
12	POC1B-GALNT4	12	10000	89913189	89920039	7.51521	0.0311969	rs10858894	0.006118
14	EVL	215	10000	100531750	100610573	11.4866	0.0311969	rs941893	0.000701
19	LSR	52	10000	35739558	35758867	9.34578	0.0311969	rs4806125	0.002235
2	BIRC6	259	10000	32582095	32843965	12.2551	0.0311969	rs72798782	0.000464
5	TRIM23	106	10000	64885506	64920187	10.0052	0.0311969	rs143113724	0.001561
7	GRB10	614	10000	50657759	50861159	12.9731	0.0311969	rs2051897	0.000316
7	DPY19L2P3	13	10000	29724769	29727859	7.30195	0.0313969	rs71528579	0.006888
9	LCN1	4	10000	138413283	138418386	5.33278	0.0313969	rs55678722	0.020928
12	LINC00173	2	10000	116971226	116974318	5.96242	0.0314969	rs10850662	0.014614
12	OR10AD1	9	10000	48596121	48597075	6.16096	0.0314969	rs11830378	0.01306
6	SERPINB9P1	134	10000	2854890	2876744	10.8331	0.0315968	rs406572	0.000997
17	DDX42	71	10000	61851548	61896677	8.09858	0.0316968	rs150030396	0.00443
19	MZF1	19	10000	59073283	59084942	7.50875	0.0316968	rs73068327	0.00614
11	FOLR2	7	10000	71927818	71932994	7.26938	0.0317968	rs514933	0.007014
19	ZNF285	63	10000	44889807	44905777	9.10007	0.0317968	rs4255877	0.002556
6	CASC14	30	10000	22134830	22147422	9.01004	0.0317968	rs4712656	0.002685
12	FLJ41278	210	10000	65277553	65371302	11.5874	0.0318968	rs1900087	0.000664
19	HAMP	5	10000	35773409	35776045	7.15849	0.0318968	rs10416533	0.007461
1	ZNF281	2	10000	200374074	200379186	5.65931	0.0318968	rs1128817	0.017363
4	CISD2	41	10000	103790134	103813963	8.71097	0.0318968	rs368629	0.003163
16	SCNN1B	144	10000	23313590	23392620	11.2882	0.0319968	rs250571	0.00078
7	PPP1R3A	34	10000	113516881	113559082	8.80261	0.0319968	rs10250492	0.003008
8	POLB	47	10000	42195972	42229331	7.93044	0.0319968	rs4526344	0.004861
11	OR6X1	2	10000	123624287	123625226	5.83908	0.0320968	rs12364099	0.015674
19	RABAC1	3	10000	42460832	42463528	5.64833	0.0320968	rs11083642	0.017472
17	CAMKK1	67	10000	3763616	3796337	10.6361	0.0321968	rs67918366	0.001109
1	HP1BP3	79	10000	21069170	21113181	9.23602	0.0321968	rs7552264	0.002373
20	HM13-AS1	5	10000	30155509	30161066	4.49702	0.0322968	rs4607	0.033954
21	DSCR4	124	10000	39426312	39493454	10.9187	0.0322968	rs56353350	0.000952
4	PPP3CA	636	10000	101944586	102268628	12.9672	0.0322968	rs74351276	0.000317
5	HSPA4	106	10000	132387661	132440709	9.66707	0.0322968	rs1131809	0.001876
10	TSPAN14	147	10000	82214037	82282391	11.5874	0.0323968	rs1870148	0.000664
19	ZNF586	21	10000	58281019	58291984	7.96768	0.0323968	rs9676435	0.004762
17	MPDU1	7	10000	7486964	7491527	8.00843	0.0324968	rs2302661	0.004656
19	TEX101	70	10000	43892762	43922767	8.85305	0.0324968	rs10853766	0.002926
1	EFNA1	9	10000	155100348	155107386	7.76291	0.0324968	rs4971066	0.005333
1	KLHL12	75	10000	202860229	202896371	9.39061	0.0324968	rs75561647	0.002181
7	CLCN1	84	10000	143013218	143049097	10.4387	0.0324968	rs2367939	0.001234
6	LGSN	22	10000	63985855	64029882	8.54013	0.0325967	rs144603738	0.003474
7	FAM180A	47	10000	135414345	135433594	9.66218	0.0325967	rs4430037	0.001881
10	ECHS1	11	10000	135175986	135186908	7.69318	0.0326967	rs11101717	0.005543
13	METTL21C	47	10000	103338096	103346871	10.5658	0.0327967	rs74619767	0.001152
16	CSNK2A2	118	10000	58191811	58231782	10.2417	0.0327967	rs41422944	0.001373
10	IDI1	20	10000	1085963	1095061	8.66376	0.0328967	rs74675648	0.003246
13	TM9SF2	128	10000	100153627	100216302	10.8331	0.0328967	rs9517769	0.000997
17	ZNF207	30	10000	30677156	30697468	8.60522	0.0328967	rs9894877	0.003352
1	C1orf106	63	10000	200860626	200884864	10.3683	0.0328967	rs374827	0.001282
4	SLC9B1	232	10000	103806204	103940896	10.262	0.0328967	rs4699042	0.001358
7	CHCHD3	448	10000	132469622	132766828	12.1045	0.0328967	rs12673096	0.000503
11	ZFPL1	2	10000	64851693	64855874	5.80661	0.0329967	rs35251366	0.015966
15	JMJD7	34	10000	42120282	42129785	9.05903	0.0329967	rs35476790	0.002614
19	CHAF1A	72	10000	4402659	4443394	9.21226	0.0329967	rs388622	0.002404
12	PRH2	4	10000	11081833	11087444	5.57834	0.0330967	rs11054080	0.018184
12	ATP5G2	17	10000	54058943	54070512	7.67117	0.0331967	rs71455254	0.005611
3	TOMM70A	65	10000	100082302	100120242	9.04649	0.0331967	rs11720172	0.002632
6	PHIP	221	10000	79644135	79788011	10.053	0.0331967	rs77673359	0.001521
11	DPP3	48	10000	66247483	66277130	8.57025	0.0332967	rs11600009	0.003417
12	TCTN1	33	10000	111051831	111086935	9.12892	0.0332967	rs61663407	0.002516
18	SYT4	9	10000	40847856	40857615	7.17977	0.0332967	rs16977446	0.007373
6	RWDD2A	2	10000	83903031	83906256	5.63912	0.0332967	rs1180178	0.017564
16	SLC7A6OS	18	10000	68334517	68344868	8.61449	0.0333967	rs11350	0.003335
1	LOC100131564	76	10000	93775665	93811368	9.39819	0.0333967	rs149845875	0.002172
7	LINC00174	45	10000	65841030	65865395	8.6036	0.0333967	rs61132090	0.003355
7	RBAKDN	5	10000	5111690	5112854	7.02098	0.0333967	rs113241650	0.008056
8	SLC20A2	172	10000	42273979	42397356	10.5982	0.0333967	rs4376487	0.001132
9	ABL1	407	10000	133589267	133763062	12.1008	0.0333967	rs35002229	0.000504
19	TMEM150B	47	10000	55824168	55836708	8.65313	0.0334967	rs12980928	0.003265
1	XPR1	380	10000	180601145	180859415	11.4447	0.0334967	rs10753222	0.000717
2	BOLL	55	10000	198591602	198651036	8.67672	0.0334967	rs113769655	0.003223
4	SLC26A1	29	10000	972860	987228	9.40919	0.0334967	rs73211813	0.002159
6	DEK	62	10000	18224399	18264799	9.95515	0.0334967	rs72840632	0.001604
6	LY6G6F	11	10000	31674683	31678372	8.41959	0.0334967	rs116165171	0.003712
17	SYNRG	105	10000	35874899	35969486	10.2866	0.0335966	rs12602776	0.00134
11	FSHB	12	10000	30252562	30256824	6.60347	0.0336966	rs78946483	0.010178
12	APPL2	190	10000	105567074	105630008	10.7041	0.0336966	rs1196761	0.001069
17	OR3A3	3	10000	3323861	3324827	6.17688	0.0336966	rs146946227	0.012943
1	SLC25A44	25	10000	156163722	156182587	7.71546	0.0337966	rs2540182	0.005475
3	HACL1	57	10000	15602210	15643359	9.94713	0.0337966	rs112181655	0.001611
5	SLC12A2	148	10000	127419482	127525380	10.6113	0.0337966	rs72794379	0.001124
9	MAN1B1	26	10000	139981378	140003639	7.64944	0.0337966	rs7871579	0.005679
10	NKX2-3	8	10000	101292689	101296280	7.31346	0.0338966	rs113459553	0.006844
5	GABRA1	132	10000	161274196	161326965	10.3568	0.0339966	rs10041985	0.00129
19	ZNF431	64	10000	21324839	21368805	8.75532	0.0340966	rs10415009	0.003087
20	SCAND1	2	10000	34541538	34543281	4.63233	0.0340966	rs35448195	0.031375
12	HOXC12	4	10000	54348713	54350350	5.78843	0.0341966	rs10876524	0.016132
3	FBLN2	306	10000	13590624	13679922	12.8361	0.0341966	rs9830334	0.00034
10	VSTM4	322	10000	50222289	50323577	11.1419	0.0342966	rs35285557	0.000844
12	PPTC7	40	10000	110972236	111021064	9.38222	0.0342966	rs140542521	0.002191
18	DSC1	136	10000	28709213	28742819	9.90869	0.0342966	rs1789071	0.001645
2	PDIA6	314	10000	10923516	10978103	10.884	0.0342966	rs56138270	0.00097
5	CENPK	135	10000	64813592	64858995	9.35317	0.0342966	rs12514697	0.002226
5	HMGCS1	36	10000	43287571	43313614	6.98839	0.0342966	rs10069507	0.008204
5	KIAA0825	626	10000	93486555	93954309	14.0821	0.0342966	rs58734583	0.000175
11	OR51L1	6	10000	5020212	5021160	6.78669	0.0343966	rs2445290	0.009184
12	AAAS	14	10000	53701239	53715412	7.32426	0.0343966	rs4759021	0.006803
12	DYNLL1-AS1	14	10000	120928140	120933749	7.43211	0.0343966	rs2168319	0.006407
12	POC1B	262	10000	89813497	89920039	11.0942	0.0343966	rs67661008	0.000866
4	FBXW7_2	232	10000	153332311	153456393	9.30043	0.0343966	rs34813642	0.002291
13	CLYBL	818	10000	100258917	100561713	14.5293	0.0344966	rs145494272	0.000138
14	ATXN3	233	10000	92524895	92572965	10.5151	0.0344966	rs10873415	0.001184
1	CDC7	39	10000	91966403	91991321	8.68978	0.0344966	rs13447478	0.0032
1	HFM1	286	10000	91726322	91870426	11.2045	0.0344966	rs282053	0.000816
17	OVCA2	5	10000	1945276	1946725	6.61612	0.0345965	rs2015866	0.010106
2	OR7E91P	17	10000	71251204	71257060	8.38035	0.0345965	rs390358	0.003793
4	NAA15	152	10000	140222675	140311935	10.2417	0.0345965	rs28572294	0.001373
7	SCIN	283	10000	12610202	12693228	12.45	0.0345965	rs1017405	0.000418
11	SYT8	12	10000	1855539	1858751	8.22576	0.0346965	rs3741230	0.00413
12	PLEKHA5	576	10000	19282625	19529333	12.8033	0.0346965	rs7399293	0.000346
12	ZBTB39	11	10000	57392616	57400297	7.7033	0.0346965	rs117805856	0.005512
19	YJEFN3	14	10000	19639669	19648393	6.93257	0.0346965	rs4808205	0.008464
1	SKINTL	222	10000	48567386	48648100	11.2459	0.0346965	rs115363116	0.000798
2	TANK	129	10000	161993465	162092683	10.6278	0.0346965	rs145062008	0.001114
16	CDIPT	2	10000	29869676	29874609	5.39686	0.0347965	rs35042042	0.020173
17	TLCD2	3	10000	1606083	1613662	5.14622	0.0347965	rs8072875	0.023297
5	BDP1	202	10000	70751441	70863649	8.97633	0.0347965	rs183867112	0.002735
9	EDF1	3	10000	139756565	139760788	5.1804	0.0347965	rs7037205	0.022843
11	RNF121	156	10000	71639767	71708643	8.79716	0.0348965	rs112447973	0.003017
2	WDR33	206	10000	128461807	128568761	10.6749	0.0348965	rs76386830	0.001086
3	ANAPC13	14	10000	134196545	134204865	6.72127	0.0348965	rs9866359	0.009527
11	FERMT3	28	10000	63974151	63991363	8.1287	0.0349965	rs882146	0.004357
17	HGS	72	10000	79650961	79669151	8.71675	0.0349965	rs7406945	0.003153
1	FNBP1L	75	10000	93913687	94020218	9.25698	0.0349965	rs2554842	0.002346
7	PEG10	14	10000	94285636	94299006	8.23457	0.0349965	rs35039803	0.00411
10	C10orf85	7	10000	122357460	122359635	7.38774	0.0350965	rs11199432	0.006567
12	OAS1	17	10000	113344738	113357712	8.282	0.0350965	rs45495393	0.004004
17	CDK5R1	2	10000	30814104	30818271	5.366	0.0350965	rs735555	0.020533
1	TOE1	4	10000	45805341	45809650	6.74634	0.0350965	rs9429157	0.009394
1	XCL2	18	10000	168510002	168513235	8.72254	0.0350965	rs114737056	0.003143
12	TPH2	257	10000	72332625	72426221	10.4598	0.0352965	rs11179056	0.00122
17	MIR548W	819	10000	60798857	61268734	12.8088	0.0352965	rs241075	0.000345
1	ARID4B	314	10000	235330209	235491532	10.3116	0.0352965	rs143080515	0.001322
3	LNP1	64	10000	100120036	100175170	10.1616	0.0352965	rs55817046	0.001434
19	LOC100131691	31	10000	59070552	59086164	7.92932	0.0353965	rs73068321	0.004864
1	MUTYH	13	10000	45794913	45806142	8.12828	0.0353965	rs3219487	0.004358
3	CPNE9	24	10000	9745509	9771592	9.2422	0.0353965	rs6796883	0.002365
3	ZBTB11	40	10000	101368282	101395988	8.14584	0.0353965	rs139969996	0.004316
5	NSD1	320	10000	176560079	176727214	10.7764	0.0353965	rs244709	0.001028
9	GOLGA1	81	10000	127640572	127703386	9.03679	0.0353965	rs646527	0.002646
1	CAPN9	244	10000	230883129	230937749	12.1269	0.0354965	rs2493145	0.000497
7	MUC3A	8	10000	100547051	100611619	7.38227	0.0354965	rs4341099	0.006587
13	ERICH6B	170	10000	46115431	46189874	11.2575	0.0355964	rs3014937	0.000793
3	IFT80	164	10000	159974773	160117320	10.2444	0.0355964	rs57843971	0.001371
11	MTL5	66	10000	68474907	68518988	9.29404	0.0356964	rs4930600	0.002299
12	RILPL2	18	10000	123899935	123921264	7.83903	0.0356964	rs28376121	0.005113
19	SH3GL1	61	10000	4360363	4400565	8.77313	0.0356964	rs8104459	0.003057
20	UBE2V1	58	10000	48697660	48732496	9.42626	0.0356964	rs1049679	0.002139
11	FAM89B	2	10000	65339819	65341669	5.62877	0.0357964	rs10896017	0.017668
16	APRT	6	10000	88875876	88878342	7.2681	0.0357964	rs4695	0.007019
16	FBXL19	23	10000	30934375	30960104	7.28999	0.0357964	rs72799341	0.006934
22	CBY1	66	10000	39052657	39069855	8.24875	0.0357964	rs13054866	0.004078
17	CYB561	14	10000	61509664	61523722	7.53237	0.0358964	rs4968774	0.00606
18	BCL2	413	10000	60790578	60986613	12.8806	0.0358964	rs8089784	0.000332
19	ACTL9	4	10000	8807746	8809180	6.05334	0.0358964	rs62117992	0.01388
19	PTGIR	6	10000	47123724	47128354	5.80584	0.0358964	rs1126510	0.015973
3	MAGI1-AS1	79	10000	65879490	65910972	10.2257	0.0358964	rs264676	0.001385
13	LRCH1	501	10000	47127295	47327175	12.6578	0.0359964	rs7330453	0.000374
15	DUOX2	34	10000	45384851	45406359	7.71118	0.0359964	rs269868	0.005488
19	ZNF418	22	10000	58433251	58446740	7.83409	0.0359964	rs10419185	0.005127
20	STAU1	140	10000	47729875	47804904	9.94942	0.0359964	rs348280	0.001609
4	SLC9B2	31	10000	103946651	103998170	9.00393	0.0359964	rs75617548	0.002694
10	ASAH2B	24	10000	52499687	52514569	8.08716	0.0360964	rs4497350	0.004458
13	LINC00457	397	10000	35009590	35214822	12.6528	0.0360964	rs12584741	0.000375
9	RORB	392	10000	77112251	77302117	12.6231	0.0360964	rs17060387	0.000381
9	S1PR3	27	10000	91606323	91620069	9.30764	0.0360964	rs7853537	0.002282
14	GEMIN2	66	10000	39583487	39606177	9.80118	0.0362964	rs17617289	0.001744
2	WTH3DI	3	10000	132118064	132121731	5.26288	0.0362964	rs6751086	0.021785
13	BIVM-ERCC5	174	10000	103459495	103528351	10.9012	0.0363964	rs61966043	0.000961
1	S100A14	5	10000	153586731	153588808	5.02077	0.0363964	rs9792967	0.025045
21	LINC00308	28	10000	23470935	23488847	8.75709	0.0363964	rs9978962	0.003084
11	OR5D14	6	10000	55563031	55563976	6.71007	0.0364964	rs61896309	0.009587
3	CNTN6	1360	10000	1134341	1445292	15.3211	0.0364964	rs57713752	9.07e-05
4	MIR548AJ2	527	10000	23199716	23464726	12.75	0.0364964	rs7661062	0.000356
15	SCG5	154	10000	32933869	32989298	12.0283	0.0365963	rs28688414	0.000524
16	RRN3	27	10000	15153878	15188158	8.05733	0.0365963	rs3751877	0.004532
6	SENP6	245	10000	76311621	76427994	10.2579	0.0365963	rs7766781	0.001361
18	RAB27B	122	10000	52495707	52562747	10.4283	0.0366963	rs72926846	0.001241
1	CD52	12	10000	26644410	26647014	7.61048	0.0366963	rs112252579	0.005803
1	RABIF	28	10000	202847409	202858385	8.61012	0.0366963	rs10920514	0.003343
11	OR51I2	6	10000	5474637	5475707	7.26019	0.0367963	rs76300102	0.00705
9	ABHD17B	20	10000	74477367	74526148	6.87561	0.0367963	rs7023190	0.008738
17	SLC35B1	7	10000	47778295	47785313	7.23791	0.0368963	rs55817237	0.007138
19	MEF2B	88	10000	19256375	19281098	9.55597	0.0368963	rs28672836	0.001993
11	CABP4	8	10000	67222817	67229245	6.93384	0.0369963	rs17501521	0.008458
12	HVCN1	45	10000	111086490	111127617	8.98101	0.0369963	rs56117211	0.002728
16	EMC8	57	10000	85812230	85833148	8.37556	0.0369963	rs59454283	0.003803
1	GOLPH3L	100	10000	150618700	150669672	9.21378	0.0369963	rs9733	0.002402
6	MAP3K5	310	10000	136878186	137113656	11.6559	0.0369963	rs13203080	0.00064
6	TFB1M	222	10000	155577263	155635617	10.8406	0.0369963	rs950994	0.000993
19	ZNF550	23	10000	58053203	58071231	8.72254	0.0370963	rs56042214	0.003143
22	MTMR3	317	10000	30279157	30426857	11.1463	0.0370963	rs62228019	0.000842
3	CMTM6	44	10000	32522803	32544403	9.16046	0.0370963	rs35574803	0.002473
3	GNB4	85	10000	179113875	179169371	10.0087	0.0370963	rs4855074	0.001558
17	SMG6	576	10000	1963132	2207069	12.4102	0.0372963	rs7213049	0.000427
2	CYP1B1	14	10000	38294745	38303323	7.5449	0.0372963	rs162561	0.006018
3	SOX2-OT	792	10000	180774467	181460013	13.6435	0.0372963	rs13074136	0.000221
11	FEZ1	108	10000	125315640	125366206	10.4827	0.0373963	rs10790736	0.001205
13	LINC00351	361	10000	85937737	86118797	11.776	0.0373963	rs77032757	0.0006
17	PSMD3	59	10000	38137020	38154213	9.06183	0.0373963	rs3785550	0.00261
2	HS1BP3	142	10000	20817563	20850864	11.0476	0.0373963	rs2304423	0.000888
10	ADRA2A	6	10000	112836789	112840662	7.17176	0.0374963	rs3750625	0.007406
14	MLH3	41	10000	75480466	75518235	7.93267	0.0374963	rs398896	0.004855
19	ZNF154	31	10000	58207642	58220579	8.59385	0.0374963	rs61730373	0.003373
1	ADAMTSL4	17	10000	150521844	150533412	8.268	0.0374963	rs12097596	0.004035
1	PTCHD2	136	10000	11539294	11597640	9.97129	0.0374963	rs72635492	0.00159
5	RAD50	93	10000	131892615	131980313	9.67788	0.0374963	rs140251311	0.001865
5	TRAPPC13	122	10000	64920557	64961954	9.40072	0.0375962	rs11741124	0.002169
14	C14orf28	15	10000	45366506	45376460	6.22569	0.0376962	rs74798617	0.012591
17	HIC1	9	10000	1958392	1962981	7.79711	0.0376962	rs9901806	0.005233
8	AGO2	258	10000	141541263	141645646	12.0035	0.0376962	rs3735805	0.000531
17	C1QTNF1-AS1	10	10000	77015290	77023737	7.40674	0.0377962	rs35115846	0.006498
11	COX8A	2	10000	63742078	63744015	4.61173	0.0378962	rs11605797	0.031754
16	TMED6	15	10000	69377148	69385712	8.53281	0.0378962	rs77901129	0.003488
22	COMT	111	10000	19929262	19957498	10.8574	0.0378962	rs9332377	0.000984
2	FANCL	167	10000	58386377	58468515	10.8055	0.0378962	rs143710592	0.001012
1	LOC101927295	52	10000	73771852	73804560	7.92227	0.0379962	rs72676698	0.004883
16	USP31	197	10000	23072727	23160591	10.4674	0.0380962	rs138849194	0.001215
18	ASXL3	324	10000	31158540	31327399	11.5874	0.0380962	rs193165994	0.000664
19	PTBP1	40	10000	797391	812327	8.46824	0.0380962	rs10414379	0.003614
2	REV1	187	10000	100016937	100106480	9.74409	0.0380962	rs149477923	0.001799
2	VRK2	453	10000	58134785	58387055	12.0934	0.0380962	rs140173153	0.000506
3	ROPN1	22	10000	123687878	123710199	7.85074	0.0380962	rs55935332	0.00508
11	NUMA1	128	10000	71713909	71791739	9.04163	0.0381962	rs77660970	0.002639
2	ACKR3	23	10000	237478379	237490994	7.75244	0.0381962	rs10183022	0.005364
5	LINC01184	71	10000	127357243	127418766	10.0064	0.0381962	rs1234527	0.00156
9	TLN1	39	10000	35697333	35732392	9.07308	0.0381962	rs41277065	0.002594
4	BDH2	43	10000	103998781	104021024	8.95507	0.0382962	rs111502946	0.002767
4	EPHA5	1196	10000	66185280	66536213	13.8031	0.0382962	rs57440904	0.000203
12	LRMP	198	10000	25205180	25261269	11.3438	0.0383962	rs11047833	0.000757
11	OR51E2	67	10000	4701400	4719076	10.3004	0.0385961	rs72865877	0.00133
15	FMN1_2	136	10000	33441984	33486934	11.0125	0.0385961	rs11072312	0.000905
1	AIM2	30	10000	159032274	159046647	7.80576	0.0385961	rs78916278	0.005208
3	SGOL1	79	10000	20202084	20227724	9.29404	0.0385961	rs140520229	0.002299
5	PP7080	7	10000	470624	473080	6.69765	0.0385961	rs72698516	0.009654
7	RBAK	77	10000	5085451	5109119	9.38138	0.0385961	rs12667141	0.002192
8	NSMAF	145	10000	59496063	59572404	10.239	0.0385961	rs13438863	0.001375
12	LOC101929549	84	10000	4809582	4829268	9.21683	0.0386961	rs118042710	0.002398
16	KCTD13	25	10000	29917656	29937553	7.69448	0.0386961	rs4548895	0.005539
5	BTNL8	116	10000	180326076	180377906	8.18664	0.0386961	rs138829714	0.00422
8	MFHAS1	446	10000	8641998	8751131	12.5416	0.0386961	rs73201845	0.000398
12	GATC	41	10000	120884240	120901556	9.09792	0.0387961	rs7957424	0.002559
9	MLANA	35	10000	5890908	5909822	9.07449	0.0387961	rs7038109	0.002592
12	PSMD9	66	10000	122326636	122355771	8.89215	0.0388961	rs117327563	0.002864
16	DUS2	61	10000	68056846	68113226	8.60849	0.0388961	rs3785108	0.003346
16	PDXDC1	81	10000	15068591	15233206	9.08439	0.0388961	rs4985155	0.002578
11	OR10AG1	9	10000	55735033	55735939	4.17908	0.0389961	rs78226543	0.040926
17	TTLL6	140	10000	46839592	46894469	10.1979	0.0389961	rs11652858	0.001406
3	CAMK2N2	3	10000	183977002	183979251	5.85396	0.0389961	rs843353	0.015542
6	AGER	10	10000	32148744	32152099	7.73769	0.0389961	rs115963005	0.005408
6	PSORS1C2	19	10000	31105310	31107127	9.27976	0.0389961	rs186562789	0.002317
12	STX2	140	10000	131274144	131323819	9.4126	0.0390961	rs115996333	0.002155
17	DPH1	33	10000	1933430	1946725	9.22909	0.0390961	rs2236375	0.002382
19	TNNT1	19	10000	55644065	55660722	7.96236	0.0390961	rs67795913	0.004776
9	ACTL7B	4	10000	111616868	111618275	6.04395	0.0390961	rs3750467	0.013954
11	CTSD	29	10000	1773981	1785222	8.49921	0.0391961	rs1317356	0.003553
11	RNF169	138	10000	74459912	74553458	9.92442	0.0391961	rs72986700	0.001631
10	STAM	302	10000	17686123	17758821	10.0996	0.0392961	rs79732928	0.001483
2	ZC3H6	98	10000	113033177	113097640	8.63095	0.0392961	rs10167748	0.003305
10	TNKS2	157	10000	93558150	93625232	9.5177	0.0393961	rs7087565	0.002035
1	CCDC18	175	10000	93646272	93744287	9.614	0.0393961	rs145702246	0.001931
6	MAD2L1BP	16	10000	43597278	43608688	6.78494	0.0393961	rs7106	0.009193
19	CEACAM4	36	10000	42125343	42133442	8.42204	0.0394961	rs1041994	0.003707
5	SLC9A3	202	10000	473333	524549	11.5762	0.0394961	rs111730658	0.000668
12	LOC574538	34	10000	246576	258332	9.47756	0.039596	rs79718529	0.00208
17	SAMD14	26	10000	48188672	48207246	9.26167	0.039596	rs2239953	0.00234
19	ZNF333	93	10000	14800869	14831772	8.94585	0.039596	rs8108593	0.002781
22	RANGAP1	73	10000	41640780	41682255	9.10652	0.039596	rs9611540	0.002547
14	GPHN	1882	10000	66974124	67648525	11.8945	0.039696	rs8006677	0.000563
14	LOC101927418	24	10000	45368110	45381120	6.23655	0.039696	rs2295160	0.012514
12	ARPC3	26	10000	110872694	110888216	8.41567	0.039796	rs55741511	0.00372
12	TMEM106C	13	10000	48357329	48362661	7.8827	0.039896	rs7964582	0.004991
21	MX1	192	10000	42792484	42831141	10.475	0.039896	rs462687	0.00121
6	TRIM15	20	10000	30130982	30140473	8.15342	0.039896	rs115303307	0.004298
7	IKZF1	218	10000	50343678	50472798	11.5133	0.039896	rs117963681	0.000691
6	LINC00472	13	10000	72124148	72130448	7.7789	0.039996	rs1727668	0.005286
7	MDH2	42	10000	75677336	75696827	8.32701	0.039996	rs13236824	0.003906
8	NKX3-1	6	10000	23536205	23540450	6.41077	0.039996	rs1567669	0.011343
3	TMEM45A	197	10000	100211462	100296285	10.4873	0.040096	rs6776432	0.001202
7	ATP6V0A4	350	10000	138391038	138482941	12.688	0.040096	rs10429091	0.000368
5	LOC100506639	31	10000	43067124	43093660	8.25678	0.040196	rs2603636	0.00406
19	TLE6	43	10000	2977535	2995182	9.1494	0.040296	rs10423222	0.002488
2	FAM179A	278	10000	29204163	29275096	11.5902	0.040296	rs921098	0.000663
4	ELOVL6	461	10000	110970228	111119820	13.1146	0.040296	rs58201679	0.000293
4	LRBA	1176	10000	151185810	151936649	13.1534	0.040296	rs191758860	0.000287
12	ANAPC7	58	10000	110810704	110841535	8.90302	0.040396	rs73206878	0.002847
15	DIS3L	103	10000	66585632	66626236	10.2511	0.040396	rs16949788	0.001366
19	OR1M1	2	10000	9203920	9204862	5.3544	0.040396	rs7259007	0.02067
5	CTC-436P18.1	186	10000	60458142	60527907	10.5722	0.040396	rs1072667	0.001148
12	USP15	340	10000	62654120	62803501	11.2575	0.040496	rs11174461	0.000793
1	KPNA6	52	10000	32573643	32642168	8.44226	0.040496	rs6673793	0.003666
15	GABRG3	1372	10000	27216428	27778373	14.7007	0.0405959	rs117879646	0.000126
1	FCRL2	51	10000	157715522	157746922	9.20314	0.0405959	rs75903990	0.002416
7	RBAK-RBAKDN	90	10000	5085451	5112854	9.38138	0.0405959	rs12667141	0.002192
11	AP2A2	263	10000	925808	1012245	10.2674	0.0406959	rs10902262	0.001354
11	RIN1	10	10000	66099541	66104000	6.79761	0.0406959	rs3016317	0.009128
1	ABL2	269	10000	179068461	179198819	10.7337	0.0407959	rs114487047	0.001052
4	HS3ST1	77	10000	11399987	11430537	11.0084	0.0407959	rs34741896	0.000907
9	LOC100499484	176	10000	100000707	100059596	9.11877	0.0407959	rs7042820	0.00253
5	FGF1	245	10000	141971742	142077635	11.5762	0.0408959	rs67197778	0.000668
13	KLF5	43	10000	73629113	73651680	9.10508	0.0409959	rs12585710	0.002549
16	CKLF	21	10000	66586465	66600190	7.5503	0.0409959	rs3785087	0.006
22	TRMT2A	16	10000	20099388	20104818	7.94202	0.0409959	rs885980	0.00483
8	TRIM35	44	10000	27142403	27168834	8.95309	0.0409959	rs10102405	0.00277
11	CCDC88B	37	10000	64107689	64125006	8.86557	0.0410959	rs12793347	0.002906
11	GLB1L3	113	10000	134146274	134189458	10.8764	0.0410959	rs140570171	0.000974
11	XRRA1	141	10000	74551954	74660232	10.1796	0.0410959	rs117426756	0.00142
13	TPT1	20	10000	45907605	45915419	7.57937	0.0410959	rs7317581	0.005904
15	FAM189A1	1264	10000	29412454	29862927	14.0821	0.0410959	rs2292630	0.000175
12	PWP1	63	10000	108079589	108106257	9.04649	0.0411959	rs2241218	0.002632
12	LINC00943	29	10000	127221552	127230800	8.07824	0.0412959	rs73234819	0.00448
15	JMJD7-PLA2G4B	66	10000	42120282	42140346	9.05903	0.0412959	rs35476790	0.002614
16	CIRH1A	44	10000	69166498	69202937	8.95904	0.0412959	rs79663314	0.002761
1	GADD45A	7	10000	68150859	68154021	6.79546	0.0412959	rs3783468	0.009139
1	SOAT1	252	10000	179262848	179327814	10.8257	0.0412959	rs6684373	0.001001
12	FGF6	27	10000	4543307	4554780	8.4299	0.0413959	rs2270438	0.003691
19	GRIK5	23	10000	42502467	42569957	7.12421	0.0413959	rs28711705	0.007605
20	BCAS4	260	10000	49411430	49493714	11.5079	0.0413959	rs75761866	0.000693
7	TES	141	10000	115850546	115898837	9.46964	0.0413959	rs80205560	0.002089
1	ZBTB7B	19	10000	154975105	154991001	8.88134	0.0414959	rs56103503	0.002881
13	CHAMP1	17	10000	115079964	115092803	6.44972	0.0415958	rs45583846	0.011097
1	HES3	3	10000	6304251	6305638	5.14369	0.0415958	rs61760837	0.023331
6	PPIL1	56	10000	36822605	36842800	8.85867	0.0415958	rs73418143	0.002917
11	KRTAP5-5	10	10000	1651032	1652159	7.14031	0.0417958	rs10838014	0.007537
19	ZNF417	27	10000	58417141	58427978	8.21262	0.0417958	rs111616082	0.00416
5	GFPT2	230	10000	179727699	179780315	11.627	0.0418958	rs1559113	0.00065
5	LOC100132356	3	10000	43065288	43067073	5.97173	0.0418958	rs316408	0.014537
5	STARD4-AS1	712	10000	110847923	111075423	12.9321	0.0419958	rs4358574	0.000323
11	JRKL	3	10000	96123157	96126727	5.87849	0.0420958	rs11021573	0.015327
19	ZNF415	98	10000	53611131	53636173	10.3046	0.0420958	rs1661928	0.001327
20	BPIFB1	40	10000	31870940	31897684	9.35235	0.0420958	rs2275082	0.002227
12	PTHLH	41	10000	28111016	28124916	8.73301	0.0422958	rs10843045	0.003125
15	KLHL25	123	10000	86302558	86338189	10.976	0.0422958	rs2542594	0.000923
17	RAMP2-AS1	6	10000	40905946	40913275	6.87397	0.0422958	rs74694625	0.008746
1	SERTAD4-AS1	3	10000	210404803	210407466	5.06094	0.0422958	rs2473814	0.024471
6	LOC100507194	9	10000	3183051	3196001	6.94466	0.0422958	rs35033794	0.008407
21	COL6A1	78	10000	47401662	47424963	9.87324	0.0423958	rs11701124	0.001677
13	GRK1	23	10000	114321596	114438637	7.56266	0.0424958	rs147362247	0.005959
14	NFATC4	23	10000	24836116	24848811	8.39092	0.0424958	rs10362	0.003771
19	PSPN	2	10000	6375304	6375860	5.00029	0.0424958	rs2304198	0.025343
1	CTSS	44	10000	150702671	150738433	8.65257	0.0424958	rs12568757	0.003266
6	NUP43	27	10000	150045451	150067708	6.19903	0.0424958	rs12212415	0.012782
6	RNF217	240	10000	125283690	125407484	11.4866	0.0424958	rs73580021	0.000701
16	CKLF-CMTM1	43	10000	66586465	66613038	7.97797	0.0425957	rs896086	0.004735
1	NPR1	13	10000	153651163	153666468	7.27066	0.0425957	rs4310476	0.007009
10	BICC1	535	10000	60272903	60588845	11.3026	0.0426957	rs1649078	0.000774
11	BBS1	41	10000	66278118	66301084	8.5998	0.0426957	rs11608107	0.003362
11	PDDC1	28	10000	767222	777487	8.16783	0.0426957	rs118104171	0.004264
12	INHBC	27	10000	57828467	57845845	7.9323	0.0426957	rs12831733	0.004856
1	S100A13	24	10000	153591275	153606568	6.8995	0.0426957	rs3806233	0.008622
17	CBX4	9	10000	77806954	77813213	6.97275	0.0427957	rs1285249	0.008276
1	CFHR2	24	10000	196912933	196928356	7.44141	0.0427957	rs41310132	0.006374
2	CRIM1	492	10000	36583369	36778278	13.0704	0.0427957	rs711251	0.0003
7	ABCB8	46	10000	150725508	150744869	8.60903	0.0427957	rs76884999	0.003345
9	IL11RA	13	10000	34652181	34661898	7.56841	0.0427957	rs1061758	0.00594
11	TRIM21	32	10000	4406126	4414926	8.7266	0.0428957	rs4144331	0.003136
12	RPLP0	6	10000	120634502	120639014	6.58728	0.0428957	rs6490287	0.010271
14	TRIP11	131	10000	92434242	92506403	9.59507	0.0428957	rs10150636	0.001951
16	RLTPR	13	10000	67679029	67691472	6.55653	0.0428957	rs73597581	0.01045
1	C1orf216	6	10000	36179476	36184790	6.63953	0.0428957	rs41267255	0.009974
2	ERBB4	3860	10000	212240441	213403352	16.3199	0.0428957	rs13409739	5.35e-05
2	MPHOSPH10	57	10000	71357443	71377232	8.29018	0.0428957	rs58980790	0.003986
7	LINC00689	31	10000	158801044	158818929	7.87727	0.0428957	rs77583917	0.005006
12	TUBA1C	20	10000	49658864	49667113	7.63237	0.0429957	rs17849882	0.005733
3	NCEH1	218	10000	172348434	172429008	11.6646	0.0429957	rs55755924	0.000637
13	URAD	22	10000	28552242	28562774	7.52437	0.0430957	rs4463949	0.006087
10	MAT1A	53	10000	82031575	82049434	8.79837	0.0431957	rs4934028	0.003015
12	CD163	56	10000	7623411	7656414	9.4714	0.0431957	rs11054130	0.002087
17	SLC2A4	6	10000	7185053	7191367	6.4853	0.0431957	rs222847	0.010877
1	TBX15	281	10000	119425665	119532179	11.4603	0.0431957	rs6675763	0.000711
3	LOC646168	69	10000	167613735	167641797	9.3466	0.0431957	rs59267528	0.002234
12	PRPF40B	13	10000	50017196	50038452	7.31661	0.0432957	rs7299609	0.006832
12	SETD1B	29	10000	122242637	122270562	7.69807	0.0432957	rs117325937	0.005528
2	DNAJC27-AS1	175	10000	25194980	25262563	10.0554	0.0432957	rs79283404	0.001519
7	FLJ40288	173	10000	132333552	132413528	10.8859	0.0433957	rs600457	0.000969
17	ZNF652	156	10000	47366567	47439835	9.57263	0.0434957	rs8080921	0.001975
1	FH	26	10000	241660856	241683085	7.57571	0.0434957	rs61737760	0.005916
1	RNF187	21	10000	228675067	228683889	8.34947	0.0434957	rs72763970	0.003858
4	SMARCAD1	156	10000	95128758	95212443	9.58944	0.0434957	rs34396188	0.001957
5	ISL1	17	10000	50678957	50690563	7.80195	0.0434957	rs3828580	0.005219
11	OR56B4	2	10000	6129008	6129968	5.3604	0.0435956	rs1462983	0.020599
16	RPGRIP1L	204	10000	53633817	53737771	10.1046	0.0435956	rs146544075	0.001479
2	LOC102724849	26	10000	216318429	216328591	8.84744	0.0435956	rs72946316	0.002935
8	RPL23AP53	54	10000	158344	182318	8.79474	0.0435956	rs61028689	0.003021
8	TSTA3	14	10000	144694787	144699732	7.16065	0.0435956	rs138093039	0.007452
1	AGO4	43	10000	36273827	36323490	7.78815	0.0436956	rs3806291	0.005259
22	MB	49	10000	36002810	36019401	7.82775	0.0437956	rs45576439	0.005145
14	AKAP5	10	10000	64932216	64941221	6.98708	0.0438956	rs1256148	0.00821
16	C16orf80	37	10000	58147496	58163296	7.31294	0.0438956	rs112501575	0.006846
20	TMEM189-UBE2V1	104	10000	48697660	48770335	9.42626	0.0438956	rs1049679	0.002139
3	ZIC4	30	10000	147103834	147124596	8.13287	0.0438956	rs7614043	0.004347
19	ZNRF4	10	10000	5455425	5456867	7.22838	0.0439956	rs17304380	0.007176
2	LOC442028	50	10000	95534429	95613087	8.80504	0.0439956	rs147926614	0.003004
3	DHX30	25	10000	47844398	47891686	7.15489	0.0439956	rs62263577	0.007476
5	CTB-118N6.3	75	10000	115783193	115807369	9.74001	0.0439956	rs6861354	0.001803
8	KCTD9	67	10000	25285363	25315984	7.57419	0.0439956	rs17053711	0.005921
19	MIR7-3HG	11	10000	4769116	4772568	7.40868	0.0440956	rs3760951	0.006491
20	MAPRE1	67	10000	31407698	31438211	9.12747	0.0440956	rs118022747	0.002518
3	SMIM4	5	10000	52570620	52574586	5.59722	0.0441956	rs6445528	0.017989
5	CTD-2270F17.1	123	10000	169816496	169849848	10.8821	0.0441956	rs138732063	0.000971
11	BRMS1	13	10000	66104803	66112582	7.31872	0.0442956	rs2016960	0.006824
16	FBXL19-AS1	4	10000	30930639	30934590	5.26343	0.0442956	rs3813020	0.021778
3	TPRG1-AS2	5	10000	188956474	188958383	6.45356	0.0442956	rs16864145	0.011073
3	IFRD2	2	10000	50325162	50330026	5.2101	0.0443956	rs1076872	0.022456
6	KIAA1919	22	10000	111580481	111590261	8.05453	0.0443956	rs9487605	0.004539
7	HERPUD2	124	10000	35672269	35734772	9.17383	0.0443956	rs140950290	0.002455
14	KTN1-AS1	10	10000	56042874	56046810	6.60978	0.0446955	rs10146870	0.010142
1	UBXN11	123	10000	26608772	26644756	9.33841	0.0446955	rs12754536	0.002244
22	EWSR1	45	10000	29663997	29696515	9.5186	0.0446955	rs28668970	0.002034
2	LOC100271832	45	10000	33152193	33171202	8.802	0.0446955	rs75070020	0.003009
4	PRSS12	147	10000	119201192	119273922	9.96436	0.0446955	rs705838	0.001596
7	CPA5	91	10000	129984629	130008571	9.32377	0.0447955	rs10234851	0.002262
11	WTAPP1	209	10000	102654406	102707497	11.2529	0.0448955	rs72979543	0.000795
12	PRR4	9	10000	10998447	11002075	7.08389	0.0448955	rs12310531	0.007778
14	CTSG	7	10000	25042723	25045466	6.96456	0.0448955	rs11623400	0.008314
12	CLIP1-AS1	6	10000	122880088	122884491	5.86943	0.0449955	rs6488958	0.015406
9	C9orf24	33	10000	34379016	34397849	8.59709	0.0449955	rs3933344	0.003367
14	TRMT5	8	10000	61438166	61447797	5.78321	0.0450955	rs2296926	0.01618
17	KRTAP2-4	2	10000	39221367	39222131	4.48918	0.0450955	rs17569398	0.03411
5	RASGRF2	754	10000	80256507	80525981	14.1928	0.0450955	rs77092265	0.000165
8	TEX15	30	10000	30689059	30706533	7.66315	0.0450955	rs2042506	0.005636
16	FAHD1	120	10000	1877224	1890203	8.23545	0.0451955	rs62038396	0.004108
19	IFNL4	7	10000	39736953	39739496	6.15596	0.0451955	rs4803221	0.013097
1	TRAPPC3	19	10000	36602169	36621654	6.92141	0.0451955	rs63443060	0.008517
12	ERP29	10	10000	112451151	112461024	6.69267	0.0452955	rs79271898	0.009681
19	MAP3K10	24	10000	40697650	40721482	7.826	0.0452955	rs62106659	0.00515
1	CD48	99	10000	160648535	160681641	9.69073	0.0452955	rs3766369	0.001852
1	FCRL3	41	10000	157647977	157670647	8.49461	0.0452955	rs111944842	0.003562
3	ARMC8	59	10000	137906089	138017228	9.63216	0.0452955	rs774802	0.001912
3	MBNL1-AS1	7	10000	151980404	151987415	6.6026	0.0452955	rs383278	0.010183
6	DHX16	16	10000	30620895	30640830	7.11832	0.0452955	rs115667304	0.00763
1	TMEM222	25	10000	27648635	27662891	7.62358	0.0453955	rs6690931	0.005761
6	RANBP9	106	10000	13621729	13711796	10.2431	0.0453955	rs149552570	0.001372
6	SESN1	160	10000	109307639	109415708	8.95838	0.0453955	rs72937014	0.002762
7	POLD2	15	10000	44154278	44163169	7.33699	0.0453955	rs2971686	0.006755
4	HPGDS	79	10000	95219706	95264027	8.17892	0.0454955	rs13132963	0.004238
10	MLLT10	115	10000	21823100	22032559	10.4704	0.0455954	rs10828249	0.001213
12	RPSAP52	170	10000	66151799	66220754	9.80013	0.0455954	rs12300067	0.001745
17	MTRNR2L1	5	10000	22022436	22023991	6.0857	0.0455954	rs79253571	0.013628
19	ZNF773	51	10000	58011308	58019510	8.13245	0.0455954	rs1978114	0.004348
4	CXCL1	5	10000	74735108	74737019	6.39441	0.0455954	rs11547681	0.011448
6	FAM8A1	16	10000	17600517	17611950	7.10452	0.0455954	rs9371004	0.007689
11	DOC2GP	3	10000	67380994	67383135	5.15804	0.0456954	rs35156880	0.023139
11	MUC15	38	10000	26580578	26593815	9.26637	0.0456954	rs1353140	0.002334
12	COQ5	79	10000	120941081	120966964	8.87691	0.0456954	rs12813930	0.002888
19	LENG9	3	10000	54972978	54974894	5.1125	0.0456954	rs10406453	0.023754
1	TOMM20	42	10000	235272657	235292256	7.60831	0.0456954	rs116180808	0.00581
6	XPO5	71	10000	43490067	43543812	9.22065	0.0456954	rs62402421	0.002393
1	CYB5RL	42	10000	54638026	54665746	9.7823	0.0457954	rs4926623	0.001762
1	LOC148709	36	10000	202830881	202844369	7.90861	0.0457954	rs41264011	0.00492
6	HINT3	27	10000	126277860	126301389	7.50582	0.0457954	rs117560632	0.00615
12	KITLG	153	10000	88886569	88974250	8.08594	0.0458954	rs116461660	0.004461
1	PLXNA2	558	10000	208195587	208417665	13.1082	0.0458954	rs17259332	0.000294
12	C12orf10	8	10000	53693469	53700965	6.17333	0.0459954	rs6580945	0.012969
1	DTL	205	10000	212208894	212278348	9.9563	0.0459954	rs67417805	0.001603
1	MAP7D1	18	10000	36621565	36646451	7.02521	0.0459954	rs272834	0.008037
10	PLAC9	62	10000	81892257	81904784	9.09008	0.0460954	rs56196124	0.00257
10	ZNF33A	107	10000	38299577	38348995	8.64867	0.0460954	rs12355396	0.003273
18	LOC100505474	160	10000	53750586	53804767	10.5435	0.0461954	rs72926434	0.001166
6	LOC101927730	47	10000	2884221	2900910	9.34168	0.0461954	rs223041	0.00224
11	MALAT1	4	10000	65265232	65273939	6.06521	0.0462954	rs1056816	0.013787
3	ATP11B	221	10000	182511290	182639421	9.43313	0.0462954	rs80122991	0.002131
19	FAM71E2	19	10000	55866275	55874620	7.95518	0.0463954	rs12976922	0.004795
19	SUGP1	75	10000	19387321	19431321	8.76539	0.0463954	rs8100204	0.00307
9	LCN12	9	10000	139846767	139849949	7.07332	0.0463954	rs4880079	0.007824
11	KRTAP5-9	7	10000	71259465	71260653	6.34158	0.0464954	rs760420	0.011794
11	STIP1	36	10000	63952743	63972020	8.33259	0.0464954	rs11607165	0.003894
12	HOXC13-AS	11	10000	54329111	54333427	6.5173	0.0464954	rs3759162	0.010683
15	DUOXA2	6	10000	45406522	45410301	4.99402	0.0464954	rs955152	0.025435
22	ZDHHC8	45	10000	20119363	20135530	8.42892	0.0464954	rs175178	0.003693
12	BICD1	1087	10000	32260184	32531141	13.5605	0.0465953	rs11051964	0.000231
1	STX6	79	10000	180941849	180992257	9.10007	0.0465953	rs12083896	0.002556
6	TFEB	145	10000	41651715	41703997	10.7621	0.0465953	rs74857400	0.001036
4	UCHL1	39	10000	41258897	41270446	7.99487	0.0466953	rs3775256	0.004691
9	LOC100506710	20	10000	37079892	37090398	7.61017	0.0466953	rs10973194	0.005804
5	FAM174A	95	10000	99871123	99922440	8.84558	0.0467953	rs1993517	0.002938
10	LINC00948	37	10000	61496747	61513203	8.31634	0.0468953	rs79293016	0.003929
19	SEPW1	6	10000	48281841	48287943	6.34806	0.0468953	rs3786777	0.011751
1	CEP85	128	10000	26560643	26605529	9.22525	0.0468953	rs7526545	0.002387
2	ANKRD39	10	10000	97513723	97523756	6.3476	0.0468953	rs4473423	0.011754
1	CD2	27	10000	117297085	117311851	7.92561	0.0469953	rs2236323	0.004874
5	ANKRD33B	298	10000	10564434	10657928	10.7855	0.0469953	rs6885465	0.001023
9	TJP2	434	10000	71736179	71870124	12.0824	0.0469953	rs4745622	0.000509
18	LOC101927698	206	10000	28681550	28742752	9.90869	0.0470953	rs1789071	0.001645
7	LOC101927356	31	10000	81638492	81659271	7.44141	0.0470953	rs77160182	0.006374
9	LOC101927502	278	10000	84304627	84391814	11.371	0.0470953	rs2796439	0.000746
3	DNAJB8	20	10000	128181274	128186091	7.99758	0.0471953	rs13434370	0.004684
3	MAP4	190	10000	47892179	48130769	10.4076	0.0471953	rs62260785	0.001255
4	DTHD1	187	10000	36283236	36346407	10.7267	0.0471953	rs17460427	0.001056
12	RHOF	36	10000	122215659	122231594	7.88125	0.0472953	rs143838180	0.004995
1	LOC646471	10	10000	26146444	26150097	6.4494	0.0472953	rs41284309	0.011099
12	PZP	152	10000	9301435	9360966	10.6495	0.0473953	rs2377744	0.001101
19	POU2F2	14	10000	42590261	42636625	6.45356	0.0473953	rs79871448	0.011073
5	LOC102546229	2	10000	133764741	133770738	5.09731	0.0473953	rs35995223	0.023963
6	GABBR1	89	10000	29570004	29600962	8.02367	0.0473953	rs115889801	0.004617
9	DPP7	7	10000	140004991	140009195	6.26078	0.0473953	rs10870183	0.012344
8	KCNB2	1048	10000	73449625	73850584	13.3242	0.0474953	rs10504543	0.000262
11	LOC646813	39	10000	50368317	50379802	7.25408	0.0475952	rs4963118	0.007074
17	ELAC2	148	10000	12894928	12921381	8.68239	0.0475952	rs112577818	0.003213
20	LOC149950	45	10000	31175280	31196694	8.75355	0.0475952	rs6087941	0.00309
6	NELFE	15	10000	31919863	31926864	7.93827	0.0475952	rs144523521	0.00484
12	EP400NL	84	10000	132568827	132610885	8.60034	0.0476952	rs73482190	0.003361
17	CCDC42	50	10000	8633245	8648154	8.32794	0.0476952	rs7218546	0.003904
3	PIGZ	68	10000	196673213	196695742	10.0971	0.0476952	rs1147240	0.001485
17	PIPOX	24	10000	27369917	27384236	7.84115	0.0477952	rs7217905	0.005107
2	B3GNT2	33	10000	62423261	62451866	8.74003	0.0477952	rs10518939	0.003113
1	XCL1	18	10000	168545710	168551315	7.33539	0.0478952	rs79981832	0.006761
15	ODF3L1	3	10000	76016318	76020027	5.59761	0.0479952	rs55905564	0.017985
16	ERI2	32	10000	20791514	20817795	8.38611	0.0479952	rs116890567	0.003781
5	FGF18	69	10000	170846666	170884630	9.60262	0.0479952	rs62383994	0.001943
2	MAP2	603	10000	210288770	210598834	11.5187	0.0480952	rs3768817	0.000689
9	CDC14B	43	10000	99262394	99382112	8.47076	0.0480952	rs7869758	0.003609
18	MBD2	111	10000	51677970	51751158	9.35977	0.0481952	rs17462765	0.002218
14	TTC7B	819	10000	91006931	91282761	13.1731	0.0482952	rs60528078	0.000284
3	ARHGEF26-AS1	279	10000	153742189	153838999	10.0017	0.0482952	rs11928425	0.001564
17	MYH13	229	10000	10204182	10276322	11.1179	0.0483952	rs12944070	0.000855
19	ACTN4	224	10000	39138266	39221171	9.82346	0.0483952	rs973009	0.001723
19	ERCC1	41	10000	45910590	45927177	8.39816	0.0483952	rs2336219	0.003756
20	LINC01056	28	10000	61669362	61685215	7.90311	0.0483952	rs4809472	0.004935
4	DGKQ	42	10000	952671	967348	8.81539	0.0483952	rs56039006	0.002987
4	SNCA	346	10000	90645249	90759447	10.4032	0.0483952	rs78942105	0.001258
19	CENPBD1P1	21	10000	59086765	59095762	7.4037	0.0484952	rs73068342	0.006509
6	MSH5	54	10000	31707724	31730455	9.22142	0.0484952	rs1802127	0.002392
12	HOXC13	16	10000	54332575	54340328	6.51049	0.0485951	rs1975473	0.010724
14	SIPA1L1	209	10000	71996028	72207946	10.962	0.0486951	rs140390708	0.00093
14	TMED10	57	10000	75598170	75643349	8.04418	0.0486951	rs2359613	0.004565
15	SECISBP2L	99	10000	49280834	49338760	9.14646	0.0486951	rs11854184	0.002492
5	AACSP1	46	10000	178191863	178203277	8.68978	0.0486951	rs60234391	0.0032
11	OR6M1	4	10000	123676115	123677057	6.26523	0.0487951	rs7952150	0.012313
1	HIST3H3	2	10000	228612545	228613026	5.11134	0.0487951	rs56336130	0.02377
6	MDFI	43	10000	41606194	41621982	9.10939	0.0488951	rs28451072	0.002543
15	ULK3	14	10000	75128456	75135687	6.22991	0.0489951	rs2290574	0.012561
13	COL4A2-AS1	21	10000	111154922	111160526	8.37461	0.0490951	rs192007231	0.003805
1	C1orf198	97	10000	230972864	231005335	10.2688	0.0490951	rs1202550	0.001353
3	NISCH	61	10000	52489523	52527088	8.56759	0.0490951	rs11921913	0.003422
11	MUC6	35	10000	1012823	1036706	8.36413	0.0491951	rs12805419	0.003827
14	LOC644919	851	10000	41423915	41610251	11.7575	0.0491951	rs72678529	0.000606
17	DYNLL2	5	10000	56160779	56167618	6.49777	0.0491951	rs58670258	0.010801
1	FAM159A	56	10000	53099065	53122737	9.17309	0.0491951	rs546662	0.002456
5	BNIP1	45	10000	172571444	172591390	8.40593	0.0491951	rs29798	0.00374
11	B3GAT1	115	10000	134248397	134281812	10.0579	0.0492951	rs117400758	0.001517
13	SPG20OS	59	10000	36920567	36943872	8.82396	0.0492951	rs9315414	0.002973
19	ATP1A3	9	10000	42470733	42498428	6.79722	0.0492951	rs75094663	0.00913
3	VGLL4	560	10000	11597540	11762242	12.7765	0.0492951	rs6769370	0.000351
9	LHX6	39	10000	124964855	124991091	9.42883	0.0492951	rs11789619	0.002136
16	ACD	4	10000	67691414	67694718	5.62066	0.0493951	rs67114979	0.01775
16	EDC4	8	10000	67906925	67918417	5.74996	0.0493951	rs8060686	0.016489
17	HAP1	43	10000	39878890	39890898	8.18235	0.0493951	rs7211719	0.00423
2	LANCL1	93	10000	211295972	211341499	9.13038	0.0493951	rs4673528	0.002514
2	MIR149	2	10000	241395417	241395506	5.17623	0.0493951	rs71428439	0.022898
11	PELI3	18	10000	66233797	66244808	7.48457	0.0494951	rs142013351	0.006223
3	TATDN2	87	10000	10290176	10322906	9.78752	0.0494951	rs76461377	0.001757
8	KCNK9	253	10000	140613080	140715299	11.6043	0.0494951	rs7012654	0.000658
2	LOC101927709	4	10000	119357358	119360542	5.28848	0.049595	rs72826346	0.021467
3	AP2M1	19	10000	183892633	183901879	7.89835	0.049595	rs55874609	0.004948
4	LINC00290	352	10000	181985242	182080302	11.8041	0.049595	rs715997	0.000591
1	SHC1	13	10000	154934773	154946959	6.71977	0.049695	rs4845401	0.009535
6	SKIV2L	27	10000	31926580	31937532	8.90815	0.049695	rs116336668	0.002839
1	PPCS	33	10000	42922011	42939049	7.29154	0.049795	rs113261346	0.006928
11	SSH3	9	10000	67070918	67080078	7.36083	0.049895	rs11608094	0.006666
18	DYNAP	13	10000	52258389	52266724	6.90948	0.049895	rs35428499	0.008574
1	UCK2	129	10000	165796731	165880855	10.2525	0.049895	rs12066877	0.001365
3	LINC01279	9	10000	112315640	112320816	5.55994	0.049895	rs2952320	0.018376
5	PRR16	746	10000	119800018	120022964	12.3205	0.049895	rs139523190	0.000448
11	APOA1	7	10000	116706468	116708338	6.48057	0.049995	rs7116797	0.010906
13	ANKRD10	90	10000	111530886	111567454	8.86368	0.049995	rs148087138	0.002909

## Sheet: Supplementary_Table6
Supplementary Table 6: Genome-wide significant genes associated with endometriosis and migraine in gene-based study
S/N	Chr	Gene	Start Position	Stop Position	P-value	Top SNP	Top SNP P-value
Endometriosis
1	11	ARL14EP	30344648	30359165	1e-06	rs4071559	5.6e-08
2	12	VEZT	95611521	95696566	1e-06	rs4762326	2.2e-09
3	1	CDC42	22379119	22419436	1e-06	rs2268179	6.51e-16
4	1	LINC00339	22351683	22357717	1e-06	rs3768579	2.69e-14
5	1	WNT4	22443797	22469519	1e-06	rs12037376	8.87e-17
6	2	GREB1	11674241	11782912	1e-06	rs11674184	2.67e-17
7	2	IL1A	113531491	113542971	1e-06	rs3783525	1.08e-08
8	12	FGD6	95470524	95611240	2e-06	rs6538618	6.68e-09
9	4	KDR	55944425	55991762	2e-06	rs73236104	1.02e-08
Migraine
1	10	PLCE1	95753745	96088148	1e-06	rs2274224	6.86e-09
2	10	PLCE1-AS1*	96039046	96046827	1e-06	rs2274224	6.86e-09
3	11	MRVI1	10594637	10715535	1e-06	rs4910165	1.8e-11
4	12	LRP1	57522281	57607125	1e-06	rs11172113	1.99e-24
5	12	STAT6	57489186	57505196	1e-06	rs324012	5.97e-16
6	1	MEF2D	156433512	156000000	1e-06	rs2274319	1.06e-11
7	1	PRDM16	2985741	3355185	1e-06	rs10218452	1.27e-17
8	2	MROH2A*	234684324	235000000	1e-06	rs13425899	9.47e-09
9	2	TRPM8	234826042	235000000	1e-06	rs10170399	1.61e-15
10	5	POC5*	74970023	75013313	1e-06	rs145639541	1.12e-08
11	6	FHL5	97010423	97064512	1e-06	rs11153082	3.03e-14
12	6	KCNK5	39156746	39197251	1e-06	rs10456100	2.73e-09
13	6	PHACTR1	12717036	13288075	1e-06	rs9349379	1.02e-09
14	6	UFL1	96969701	97003151	1e-06	rs9486467	5.77e-13
15	19	TMEM91*	41869870	41889987	2e-06	rs11670739	4.3e-07
16	2	MSL3P1	234774089	235000000	2e-06	rs213544	4.08e-07
17	5	ANKDD1B*	74907300	74967671	2e-06	rs42854	4.97e-08
		* genes not previously reported for migraine

## Sheet: Supplementary_Table7
Supplementary Table 7: Nominally significant (P < 0.01) overlapping genes between endometriosis and migraine GWAS data following gene-based analysis (VEGAS2 method)
Chr	Genes	Start Position	Stop Position	Endometriosis				Migraine
				Pvalue	TopSNP	TopSNP-pvalue		Pvalue	TopSNP	TopSNP-pvalue	FCP-value
17	SLC35G6	7384720	7386383	0.00158998	rs9891297	0.0003088		9.39999e-05	rs8065577	2.21e-05	2.49838e-06
11	DKFZp779M0652	45792982	45793909	0.00177998	rs78911884	0.0004869		0.000319	rs79229167	7.9e-05	8.73381e-06
17	POLR2A	7387697	7417935	0.00440996	rs9890935	0.0001845		0.0002	rs9906630	7.95e-06	1.31779e-05
17	ZBTB4	7362684	7387568	0.00669993	rs59665520	0.0003019		0.000364	rs8076791	1.43e-05	3.39575e-05
8	NRG1-IT3	32298261	32300241	0.000489	rs2347485	9.263e-05		0.00949991	rs16879394	0.001979	6.16898e-05
17	TNFSF12-TNFSF13	7452374	7464925	0.00415996	rs189650944	0.0002058		0.00125999	rs143094271	6.62e-05	6.89723e-05
9	ABO	136130562	136150630	0.00175998	rs2519093	3.961e-05		0.00346997	rs647800	9.16e-05	7.9429e-05
14	LINC00618	97409915	97411731	0.00108999	rs58881967	0.000238		0.00779992	rs78892879	0.002007	0.000107763
3	SCN11A	38887259	38995142	0.00704993	rs7433733	0.0001484		0.00156998	rs4320030	3.44e-05	0.000137373
19	NCCRP1	39687603	39692522	0.00467995	rs12985483	0.002041		0.00244998	rs12610064	0.001067	0.000141902
17	CHRNB1	7348405	7360932	0.00979902	rs7215056	0.001021		0.00192998	rs111972643	0.000204	0.000224593
14	SERPINA6	94770584	94789688	0.00677993	rs56252611	0.0002351		0.00286997	rs61980636	0.000102	0.000230526
14	OR4E2	22133296	22134238	0.00422996	rs2874103	0.001384		0.00577994	rs970382	0.001915	0.00028407
10	HSPA14	14880158	14913740	0.00770992	rs10906772	0.0005868		0.00593994	rs17268499	0.000437	0.000503363
17	HLF	53342320	53402426	0.00929907	rs2270378	0.0001741		0.00772992	rs11650482	0.00015	0.000757662
15	SMAD3	67358194	67487533	0.00902991	rs7173811	7.607e-05		0.00949905	rs12593904	6.95e-05	0.000888959
15	VPS33B	91541645	91565851	0.00969903	rs182789659	0.0006797		0.0096699	rs79253100	0.000562	0.000963629

## Sheet: Supplementary_Table8
Supplementary Table 8: Nominally significant (P < 0.05) overlapping genes between endometriosis and migraine GWAS data following gene-based analysis (VEGAS2 method)
Chr	Genes	Start Position	Stop Position	Endometriosis				Migraine
				Pvalue	TopSNP	TopSNP-pvalue		Pvalue	TopSNP	TopSNP-pvalue	FCP-value
9	TRIM32	119449580	119463579	0.0275972	rs11793648	0.003143		5e-06	rs76973802	7.15e-07	2.31763e-06
17	SLC35G6	7384720	7386383	0.00158998	rs9891297	0.0003088		9.39999e-05	rs8065577	2.21e-05	2.49838e-06
11	DKFZp779M0652	45792982	45793909	0.00177998	rs78911884	0.0004869		0.000319	rs79229167	7.9e-05	8.73381e-06
17	POLR2A	7387697	7417935	0.00440996	rs9890935	0.0001845		0.0002	rs9906630	7.95e-06	1.31779e-05
20	SEC23B	18488187	18542059	7.19999e-05	rs6075358	1.925e-06		0.0209979	rs116883772	0.000674	2.17739e-05
10	CASC10	21783420	21786213	0.000167	rs12770228	6.315e-05		0.0114989	rs12770228	0.004685	2.71973e-05
17	ZBTB4	7362684	7387568	0.00669993	rs59665520	0.0003019		0.000364	rs8076791	1.43e-05	3.39575e-05
8	NRG1-IT3	32298261	32300241	0.000489	rs2347485	9.263e-05		0.00949991	rs16879394	0.001979	6.16898e-05
17	TNFSF12-TNFSF13	7452374	7464925	0.00415996	rs189650944	0.0002058		0.00125999	rs143094271	6.62e-05	6.89723e-05
10	SKIDA1	21802408	21814611	0.000209	rs946711	5.405e-05		0.0290971	rs946711	0.008565	7.91193e-05
9	ABO	136130562	136150630	0.00175998	rs2519093	3.961e-05		0.00346997	rs647800	9.16e-05	7.9429e-05
13	NALCN	101706129	102068813	0.000339	rs946025	9.417e-07		0.019698	rs560750	6.79e-05	8.62532e-05
8	CLDN23	8559665	8561617	0.0194981	rs12548737	0.003875		0.000426	rs61754959	8e-05	0.000105476
14	LINC00618	97409915	97411731	0.00108999	rs58881967	0.000238		0.00779992	rs78892879	0.002007	0.000107763
10	NRP1	33466418	33623833	0.0194981	rs182093735	0.0001549		0.000510999	rs2506142	3.32e-06	0.000124709
12	MYO1A	57422300	57444549	0.030097	rs138851352	0.002222		0.000361	rs4759272	2.17e-05	0.000135052
3	SCN11A	38887259	38995142	0.00704993	rs7433733	0.0001484		0.00156998	rs4320030	3.44e-05	0.000137373
19	NCCRP1	39687603	39692522	0.00467995	rs12985483	0.002041		0.00244998	rs12610064	0.001067	0.000141902
17	TNFSF13	7461608	7464925	0.0458954	rs11552708	0.01307		0.000262	rs143094271	6.62e-05	0.000148246
11	FSHB	30252562	30256824	0.000486	rs676349	0.0001394		0.0336966	rs78946483	0.010178	0.000196841
8	AGO2	141541263	141645646	0.000452	rs7832054	4.503e-06		0.0376962	rs3735805	0.000531	0.000204124
1	MRPS21	150266261	150281414	0.0179982	rs138496123	0.001416		0.000992999	rs471464	7.87e-05	0.000213256
17	CHRNB1	7348405	7360932	0.00979902	rs7215056	0.001021		0.00192998	rs111972643	0.000204	0.000224593
14	SERPINA6	94770584	94789688	0.00677993	rs56252611	0.0002351		0.00286997	rs61980636	0.000102	0.000230526
8	FAM49B	130851838	131028897	0.010499	rs117046451	9.781e-05		0.00198998	rs76215390	1.72e-05	0.000246035
20	BCAS4	49411430	49493714	0.000529999	rs6096117	6.526e-06		0.0413959	rs75761866	0.000693	0.000257292
14	OR4E2	22133296	22134238	0.00422996	rs2874103	0.001384		0.00577994	rs970382	0.001915	0.00028407
10	MLLT10	21823100	22032559	0.000542999	rs7894565	1.079e-05		0.0455954	rs10828249	0.001213	0.000287353
2	IL36RN	113816214	113822320	0.0141986	rs2278717	0.002536		0.00177998	rs114189538	0.000215	0.00029281
15	NR2F2-AS1	96809615	96870590	0.0339966	rs3743466	0.0009746		0.000746999	rs1437588	1.73e-05	0.000294103
2	IL37	113670547	113676458	0.00147999	rs2723177	0.0002358		0.0173983	rs2708939	0.003339	0.000297843
17	SPDYE4	8656423	8661877	0.0220978	rs76500808	0.004132		0.00122999	rs72848105	0.000245	0.000312924
11	RCOR2	63678692	63684316	0.00123999	rs12292160	0.0004315		0.029897	rs320109	0.012219	0.000415304
17	CYB561	61509664	61523722	0.00114999	rs2286572	0.0001543		0.0358964	rs4968774	0.00606	0.000458012
10	HSPA14	14880158	14913740	0.00770992	rs10906772	0.0005868		0.00593994	rs17268499	0.000437	0.000503363
11	SLC25A22	790474	798269	0.0223978	rs111277421	0.005844		0.00207998	rs112750986	0.000506	0.000511253
16	DDX28	68055176	68057770	0.00274997	rs237831	0.001376		0.0170983	rs13816	0.008175	0.00051557
17	FGF11	7342688	7348251	0.0111989	rs9906416	0.002593		0.00439996	rs9906416	0.000956	0.000537985
3	TMA7	48481685	48485537	0.0469953	rs4858820	0.02026		0.00112999	rs7126	0.000469	0.000575822
5	FAM172A	92953430	93447404	0.0343966	rs115751571	0.0004687		0.00156998	rs10055389	1.43e-05	0.000584653
12	TMEM194A	57449425	57472574	0.0326967	rs7135297	0.002559		0.00177998	rs61937566	0.000117	0.000625741
2	PAX8-AS1	113993103	114024600	0.00465995	rs13405033	0.0001365		0.0135986	rs11903972	0.000363	0.000675928
3	ZBTB11	101368282	101395988	0.00181998	rs61685120	0.0001762		0.0353965	rs139969996	0.004316	0.000686087
2	PAX8	113973573	114036498	0.00473995	rs67802835	8.732e-05		0.0140986	rs17043176	0.000299	0.000709259
8	MYBL1	67474409	67525480	0.0418958	rs117045962	0.004685		0.00159998	rs79752382	0.000142	0.000711238
17	HLF	53342320	53402426	0.00929907	rs2270378	0.0001741		0.00772992	rs11650482	0.00015	0.000757662
6	LOC101928519	19068773	19180711	0.0110989	rs143439730	0.0002107		0.00665993	rs77981680	0.000121	0.000777066
12	RDH16	57345215	57351418	0.0108989	rs746049	0.001378		0.00716993	rs11172074	0.001053	0.000817152
8	KCTD9	25285363	25315984	0.00181998	rs17053711	0.0001776		0.0439956	rs17053711	0.005921	0.00083535
15	SMAD3	67358194	67487533	0.00902991	rs7173811	7.607e-05		0.00949905	rs12593904	6.95e-05	0.000888959
6	HMGA1	34204576	34214008	0.019998	rs73744859	0.004947		0.00450995	rs1011905	0.001185	0.000930184
1	GOLPH3L	150618700	150669672	0.00243998	rs12731712	0.0001366		0.0369963	rs9733	0.002402	0.000930929
8	CDCA2	25316512	25365425	0.00296997	rs55796651	0.0001702		0.0309969	rs62502024	0.001999	0.000947579
7	TMED4	44618761	44621827	0.019998	rs3750098	0.005493		0.00460995	rs3750098	0.001326	0.000948787
1	NDUFS5	39491966	39500308	0.0141986	rs7546089	0.001317		0.00652993	rs6691796	0.000595	0.000953672
15	VPS33B	91541645	91565851	0.00969903	rs182789659	0.0006797		0.0096699	rs79253100	0.000562	0.000963629
7	DDX56	44605015	44614137	0.0116988	rs17725305	0.001777		0.00821992	rs17725305	0.001326	0.000985623
5	NR2F1-AS1	92745061	92917026	0.0371963	rs12652461	0.001975		0.00272997	rs6860632	0.000109	0.00103525
9	GABBR2	101050363	101471479	0.0477952	rs774342	0.000122		0.00218998	rs10986740	4.4e-06	0.00106394
22	CABP7	30116343	30127820	0.00386996	rs9614041	0.0002599		0.0276972	rs140092	0.001832	0.00108698
12	MBD6	57916658	57923931	0.0217978	rs2620679	0.006983		0.00507995	rs61741508	0.001665	0.00111932
16	C16orf70	67143914	67182442	0.0325967	rs9033	0.004451		0.00347997	rs58843677	0.000471	0.00114392
10	ASCC1	73855789	73976892	0.0113989	rs11819693	0.0003753		0.010099	rs7073342	0.000333	0.00115918
10	ADD3	111765725	111895323	0.00395996	rs61881617	0.000113		0.030397	rs12261598	0.001048	0.00120671
10	CDNF	14861250	14879983	0.0120988	rs11259359	0.0008423		0.0108989	rs35258303	0.000668	0.0013099
16	TMEM219	29973350	29984373	0.0115988	rs56357065	0.002238		0.0113989	rs56357065	0.002095	0.00131303
7	SSPO	149473130	149531053	0.049795	rs6960187	0.001563		0.00280997	rs12534509	7.18e-05	0.00138165
17	SMYD4	1682828	1733175	0.0174983	rs9893456	0.0006762		0.00803992	rs72822450	0.000298	0.00138841
11	TALDO1	747431	765024	0.00694993	rs56340568	0.0005755		0.020498	rs113298336	0.001683	0.00140414
6	C6orf1	34214156	34216885	0.0247975	rs77988055	0.004688		0.00576994	rs34410712	0.001	0.00140964
1	NRD1	52254865	52344609	0.0117988	rs1770791	0.0004975		0.0121988	rs80179376	0.000464	0.00141717
8	SNX16	82711817	82754521	0.0482952	rs114323125	0.003151		0.00298997	rs114323125	0.000154	0.00142133
22	ASCC2	30184596	30234293	0.0258974	rs60665668	0.00106		0.00561994	rs5763529	0.000216	0.00143141
17	C17orf74	7328934	7330886	0.00690993	rs72842820	0.002343		0.0215978	rs72842820	0.007425	0.00146403
19	ZNF333	14800869	14831772	0.00381996	rs4808304	0.0002313		0.039596	rs8108593	0.002781	0.00148178
20	LOC101929698	31097761	31108088	0.0116988	rs293566	0.001422		0.0133987	rs293570	0.001929	0.00153
17	TANC2	61086897	61505067	0.00638994	rs3760257	0.000108		0.0259974	rs239362	0.000447	0.00161184
9	LINC00950	35860270	35865515	0.0190981	rs12552435	0.003937		0.00870991	rs4879932	0.001621	0.00161377
17	FXR2	7494547	7518215	0.029997	rs112715785	0.001743		0.00554994	rs34416693	0.000286	0.00161498
22	MB	36002810	36019401	0.00392996	rs5750135	0.0003623		0.0437956	rs45576439	0.005145	0.0016639
5	LOC100505878	86042634	86045589	0.039896	rs1363339	0.008707		0.00438996	rs1422236	0.000908	0.0016901
1	LOC440700	165667986	165679199	0.0166983	rs7537704	0.001035		0.010499	rs11579160	0.000748	0.0016916
10	MICU1	74127083	74385949	0.0393961	rs12356915	0.002124		0.00454995	rs12777811	0.000208	0.00172559
7	MDH2	75677336	75696827	0.00466995	rs144486980	0.0004311		0.039996	rs13236824	0.003906	0.00179039
12	LOC101928002	70107412	70132348	0.0149985	rs76204681	0.0007521		0.0129987	rs75079677	0.00065	0.00186046
1	HTR6	19991779	20007459	0.0118988	rs3790757	0.001078		0.0164984	rs115124268	0.001647	0.00187198
13	KLF5	73629113	73651680	0.00490995	rs9573096	0.0002601		0.0409959	rs12585710	0.002549	0.0019144
11	MPPED2	30406039	30607930	0.0114989	rs10835663	0.0001116		0.0178982	rs35695296	0.00019	0.00195283
3	IFRD2	50325162	50330026	0.00477995	rs138558275	0.002343		0.0443956	rs1076872	0.022456	0.00200706
3	ITGB5	124481794	124606144	0.0106989	rs2333023	0.0002198		0.020098	rs3772840	0.000386	0.00203088
10	ANAPC16	73975757	73995618	0.0154985	rs7092282	0.001462		0.0144986	rs3206257	0.001315	0.00211239
17	MYH13	10204182	10276322	0.00469995	rs62060458	7.258e-05		0.0483952	rs12944070	0.000855	0.00213547
6	EXOC2	485137	693141	0.0307969	rs2073007	0.0002044		0.00743993	rs17135931	4.26e-05	0.00214949
7	SLC35B4	133974089	134001827	0.0472953	rs148035419	0.005132		0.00493995	rs1646702	0.000522	0.00218724
19	PRSS57	685545	695461	0.0146985	rs62131271	0.000831		0.0160984	rs7359958	0.000729	0.0022122
7	ZNF862	149535508	149564568	0.0260974	rs6974897	0.00198		0.00930991	rs73168071	0.000627	0.00226506
1	ARNT	150782180	150849244	0.00979902	rs11204734	0.0005786		0.0253975	rs11204735	0.001777	0.00231414
19	DPRX	54135309	54140263	0.0209979	rs11672792	0.00891		0.0120988	rs7256933	0.004374	0.00235706
11	PLCB3	64018994	64036924	0.0465953	rs589030	0.003304		0.00582994	rs28395876	0.000404	0.00250215
7	CREB5	28338939	28865511	0.0142986	rs71539564	3.086e-05		0.0190981	rs4719939	4.14e-05	0.00251387
8	CHMP4C	82644687	82671748	0.0243976	rs17706460	0.001132		0.0114989	rs17706460	0.000447	0.00257505
10	REEP3	65281122	65384883	0.0272973	rs7075302	0.0009431		0.010399	rs9919429	0.000293	0.00260218
3	LSMEM2	50316517	50325545	0.0108989	rs12635953	0.003553		0.0261974	rs112911401	0.008717	0.00261573
14	FBXO33	39865576	39901704	0.0161984	rs34785385	0.0006649		0.0181982	rs34785385	0.000924	0.00269114
11	CELF1	47487488	47574792	0.0318968	rs74445441	0.001196		0.00939906	rs11039281	0.000304	0.0027319
6	PSORS1C2	31105310	31107127	0.00770992	rs2072108	0.0004647		0.0389961	rs186562789	0.002317	0.00273885
3	PFKFB4	48555116	48594227	0.0352965	rs2267846	0.002487		0.00857991	rs62261468	0.000553	0.00275655
10	ADK	75910942	76469061	0.0126987	rs7918318	0.0002174		0.0240976	rs10762631	0.00045	0.0027822
2	IL1B	113587336	113594356	0.0115988	rs1143634	0.001708		0.0265973	rs1143642	0.004071	0.00280234
16	FLJ26245	34980922	34990995	0.019798	rs34151874	0.007799		0.0172983	rs2405199	0.006736	0.00307516
5	N4BP3	177540555	177553107	0.020198	rs55727122	0.001648		0.0170983	rs3935147	0.001392	0.00309813
10	ARHGAP12	32094325	32217804	0.0448955	rs75468282	0.001307		0.00771992	rs118076480	0.000212	0.003108
1	OSBPL9	52082545	52254891	0.0264974	rs12736315	0.001459		0.0136986	rs111560165	0.000666	0.00323818
1	FAM131C	16384263	16400127	0.020398	rs77818589	0.001708		0.0180982	rs9442236	0.001401	0.00328715
4	FGFRL1	1005609	1020686	0.0122988	rs4647930	0.0008349		0.0308969	rs11734750	0.002165	0.00337258
4	NUDT6	123813798	123844159	0.0182982	rs13134412	0.001285		0.0232977	rs62323500	0.001726	0.00373458
10	LINC00200	1205707	1210612	0.0139986	rs60248962	0.001509		0.0306969	rs12570526	0.002884	0.00376103
1	CTSK	150768683	150780917	0.0481952	rs149447143	0.009132		0.00929907	rs4970976	0.001487	0.00390371
12	SPSB2	6980099	6982521	0.0313969	rs35535772	0.007816		0.0144986	rs143802088	0.003353	0.00395793
6	PACRG-AS1	163731016	163745505	0.0279972	rs12197625	0.00145		0.0162984	rs9365552	0.000956	0.00396639
3	AADAC	151531860	151546276	0.0221978	rs73016413	0.001485		0.0207979	rs13070603	0.00142	0.00400758
2	HNRNPLL	38790327	38830178	0.0207979	rs77480198	0.001197		0.0227977	rs7573095	0.001272	0.00410325
10	IDI2-AS1	1068576	1090141	0.0241976	rs12768746	0.001959		0.019598	rs12269003	0.001425	0.00410386
11	CLCF1	67131638	67141648	0.0171983	rs72932730	0.002203		0.0282972	rs12788752	0.004127	0.0041989
1	SKINTL	48567386	48648100	0.0140986	rs2134477	0.000292		0.0346965	rs115363116	0.000798	0.00421803
11	CTR9	10772810	10801290	0.0388961	rs11042957	0.002418		0.0127987	rs6699	0.000674	0.00428388
3	CNTN6	1134341	1445292	0.0136986	rs58445416	3.784e-05		0.0364964	rs57713752	9.07e-05	0.00430007
3	SSR3	156257928	156272973	0.0306969	rs79341213	0.002774		0.0162984	rs3773713	0.001796	0.00430281
10	DDIT4	74033676	74035797	0.0255974	rs8316	0.02421		0.019598	rs8316	0.017018	0.00431306
12	KCTD10	109886459	109915155	0.0254975	rs61941583	0.001346		0.019698	rs66539960	0.000923	0.00431754
7	OGDH	44646120	44748669	0.0272973	rs757702	0.0008208		0.0185981	rs17133935	0.000586	0.00435876
17	UBE2G1	4172511	4269969	0.0327967	rs9889739	0.002477		0.0155984	rs75195523	0.001005	0.00438832
5	FGF18	170846666	170884630	0.0107989	rs11738946	0.0003695		0.0479952	rs62383994	0.001943	0.00443919
11	TEX40	64067862	64072239	0.0382962	rs2286614	0.01404		0.0136986	rs66968227	0.004611	0.00448688
1	VAMP3	7831328	7841492	0.0412959	rs1776352	0.00227		0.0129987	rs707460	0.000642	0.00457879
12	ELK3	96588206	96661606	0.030397	rs77132416	0.0004878		0.0176982	rs78405390	0.000253	0.00458767
14	SEC23A	39501122	39572437	0.030197	rs34984050	0.0008856		0.0181982	rs56034205	0.000573	0.00467455
5	LHFPL2	77781037	77944648	0.0480952	rs114178254	0.0008259		0.0121988	rs10061226	0.000226	0.00495235
14	TRMT5	61438166	61447797	0.0130987	rs2296927	0.004333		0.0450955	rs2296926	0.01618	0.00498202
10	IDI1	1085963	1095061	0.0179982	rs2472533	0.001563		0.0328967	rs74675648	0.003246	0.00499235
15	SPTBN5	42140343	42186275	0.0229977	rs56198158	0.0004972		0.0259974	rs890503	0.000542	0.00503542
17	MPO	56347216	56358296	0.0230977	rs2071409	0.002278		0.0258974	rs34704261	0.00248	0.00503757
13	CTAGE10P	50464544	50467516	0.0194981	rs61747168	0.001689		0.0307969	rs7316930	0.00257	0.00505471
5	GABRA1	161274196	161326965	0.0188981	rs1457706	0.0006749		0.0339966	rs10041985	0.00129	0.00536476
16	DUS2	68056846	68113226	0.0166983	rs237831	0.001376		0.0388961	rs3785108	0.003346	0.00541638
10	MIR1256_10	74119697	74336541	0.039596	rs12356915	0.002124		0.0169983	rs7071040	0.000743	0.00558891
4	CISD2	103790134	103813963	0.0213979	rs113827356	0.002275		0.0318968	rs368629	0.003163	0.00565792
1	AKIRIN1	39456915	39471737	0.0316968	rs6694920	0.002422		0.0221978	rs10888609	0.002012	0.00581124
13	CLYBL	100258917	100561713	0.0208979	rs6491535	8.408e-05		0.0344966	rs145494272	0.000138	0.00593666
19	PTBP1	797391	812327	0.0192981	rs351995	0.001799		0.0380962	rs10414379	0.003614	0.00603982
15	MAP2K5	67835020	68099455	0.0411959	rs3784688	0.0007022		0.0180982	rs938875	0.00028	0.0061147
11	PTPRJ	48002109	48192394	0.0363964	rs34972471	0.0007732		0.0207979	rs11039482	0.000389	0.00619669
12	LIN7A	81191170	81331694	0.0312969	rs79208386	0.0005365		0.0241976	rs11114635	0.000401	0.00619913
2	LOC101927661	67440539	67471706	0.0417958	rs76208056	0.001285		0.0184982	rs114518292	0.000544	0.00631277
1	UCK2	165796731	165880855	0.0154985	rs7533364	0.000362		0.049895	rs12066877	0.001365	0.00631384
10	JMJD1C	64926980	65225761	0.0471953	rs7895610	0.0008911		0.0163984	rs7075195	0.000296	0.00631835
14	AKAP5	64932216	64941221	0.0176982	rs2230491	0.002873		0.0438956	rs1256148	0.00821	0.00633948
1	LOC100131564	93775665	93811368	0.0250975	rs4847239	0.001809		0.0333967	rs149845875	0.002172	0.00677603
12	LOC101928420	81156932	81164494	0.0269973	rs12425895	0.003337		0.0310969	rs74645896	0.003698	0.00678566
8	VCPIP1	67542487	67579452	0.049995	rs142006084	0.004765		0.0170983	rs61753692	0.001509	0.00689386
8	LOC100128993	19041185	19103032	0.0279972	rs115662107	0.0002823		0.0308969	rs148536964	0.00027	0.00696585
19	ZIK1	58095627	58103758	0.0324968	rs150043908	0.00646		0.0266973	rs2074205	0.005544	0.00698382
10	IDI2	1064846	1071799	0.0409959	rs3750729	0.003974		0.0215978	rs1044261	0.002205	0.00710945
17	MPDU1	7486964	7491527	0.0282972	rs72827584	0.004559		0.0324968	rs2302661	0.004656	0.00734881
22	SGSM3	40766594	40806293	0.0362964	rs11704314	0.003405		0.0255974	rs76075068	0.002273	0.00741538
8	MFHAS1	8641998	8751131	0.0240976	rs11249891	0.0002476		0.0386961	rs73201845	0.000398	0.00743904
11	PDDC1	767222	777487	0.0223978	rs4963161	0.001988		0.0426957	rs118104171	0.004264	0.00760484
1	SERTAD4-AS1	210404803	210407466	0.0235976	rs2473814	0.0124		0.0422958	rs2473814	0.024471	0.00789449
11	PTPRCAP	67202980	67205153	0.040496	rs12787021	0.02469		0.0248975	rs67501657	0.015644	0.0079647
12	MYO1H	109826523	109886176	0.0436956	rs3825393	0.001125		0.0232977	rs73194230	0.000568	0.00803198
20	NOL4L	31030861	31172875	0.0378962	rs293566	0.001422		0.0271973	rs6119267	0.000899	0.00811918
12	NR2C1	95414004	95467404	0.0368963	rs35582	0.001317		0.0282972	rs11107868	0.001086	0.00821116
14	TRAPPC6B	39617014	39639634	0.0356964	rs10483541	0.002904		0.0293971	rs2038359	0.002115	0.00824759
12	OR10AD1	48596121	48597075	0.0358964	rs75531856	0.01531		0.0314969	rs11830378	0.01306	0.00880189
12	ZBTB39	57392616	57400297	0.0331967	rs754398	0.004842		0.0346965	rs117805856	0.005512	0.00894544
11	PRDX5	64085559	64089295	0.0479952	rs1047206	0.01619		0.0247975	rs1047206	0.007818	0.00920431
17	CCDC42	8633245	8648154	0.0250975	rs112414721	0.001895		0.0476952	rs7218546	0.003904	0.00925055
5	SLC12A2	127419482	127525380	0.0373963	rs78797627	0.001101		0.0337966	rs72794379	0.001124	0.00969838
17	SLC2A4	7185053	7191367	0.029697	rs5418	0.007989		0.0431957	rs222847	0.010877	0.00982448
13	BIVM-ERCC5	103459495	103528351	0.0362964	rs4150374	0.0009051		0.0363964	rs61966043	0.000961	0.0100788
8	NSMAF	59496063	59572404	0.0345965	rs117703176	0.001262		0.0385961	rs13438863	0.001375	0.0101731
5	LINC01184	127357243	127418766	0.0350965	rs114537516	0.001359		0.0381962	rs1234527	0.00156	0.0102079
20	LOC149950	31175280	31196694	0.0281972	rs56827178	0.001788		0.0475952	rs6087941	0.00309	0.0102178
11	MUC6	1012823	1036706	0.0274973	rs76600772	0.001926		0.0491951	rs12805419	0.003827	0.0102884
13	METTL21C	103338096	103346871	0.0425957	rs7990562	0.001471		0.0327967	rs74619767	0.001152	0.0105801
7	ABCB8	150725508	150744869	0.0348965	rs6979693	0.002914		0.0427957	rs76884999	0.003345	0.0112106
5	GFPT2	179727699	179780315	0.0357964	rs7725605	0.0005055		0.0418958	rs1559113	0.00065	0.0112516
10	STAM	17686123	17758821	0.0383962	rs116638061	0.001305		0.0392961	rs79732928	0.001483	0.0113107
15	FMN1_2	33441984	33486934	0.039896	rs76540084	0.0009299		0.0385961	rs11072312	0.000905	0.0115119
1	CTSS	150702671	150738433	0.0365963	rs3754212	0.003101		0.0424958	rs12568757	0.003266	0.0116113
19	HAMP	35773409	35776045	0.0493951	rs55863037	0.01237		0.0318968	rs10416533	0.007461	0.0117428
4	SLC9B2	103946651	103998170	0.0476952	rs66819851	0.004027		0.0359964	rs75617548	0.002694	0.0126485
6	NUP43	150045451	150067708	0.0432957	rs12212415	0.01417		0.0424958	rs12212415	0.012782	0.0134276
19	LENG9	54972978	54974894	0.0410959	rs10423424	0.01978		0.0456954	rs10406453	0.023754	0.0136666
10	BICC1	60272903	60588845	0.049795	rs2393455	0.000902		0.0426957	rs1649078	0.000774	0.0152086
1	PPCS	42922011	42939049	0.0463954	rs16829572	0.006573		0.049795	rs113261346	0.006928	0.0163344
											0.05
											20473
											2.44224e-06

## Sheet: Supplementary_Table9
Supplementary Table 9: Nominally significant (P < 0.1) overlapping genes between endometriosis and migraine GWAS data following gene-based analysis (VEGAS2 method)
Chr	Gene	Start Position	Stop Position	Endometriosis				Migraine
				Pvalue	TopSNP	TopSNP-pvalue		Pvalue	TopSNP	TopSNP-pvalue	FCP-value
11	ARL14EP	30344648	30359165	9.99999e-07	rs4071559	5.604e-08		0.0553945	rs4071559	0.005967	9.80968e-07
9	TRIM32	119449580	119463579	0.0275972	rs11793648	0.003143		5e-06	rs76973802	7.15e-07	2.31763e-06
17	SLC35G6	7384720	7386383	0.00158998	rs9891297	0.0003088		9.39999e-05	rs8065577	2.21e-05	2.49838e-06
12	FGD6	95470524	95611240	2e-06	rs6538618	6.676e-09		0.0949051	rs11107912	0.001356	3.12755e-06
11	DKFZp779M0652	45792982	45793909	0.00177998	rs78911884	0.0004869		0.000319	rs79229167	7.9e-05	8.73381e-06
17	POLR2A	7387697	7417935	0.00440996	rs9890935	0.0001845		0.0002	rs9906630	7.95e-06	1.31779e-05
20	SEC23B	18488187	18542059	7.19999e-05	rs6075358	1.925e-06		0.0209979	rs116883772	0.000674	2.17739e-05
10	CASC10	21783420	21786213	0.000167	rs12770228	6.315e-05		0.0114989	rs12770228	0.004685	2.71973e-05
17	ZBTB4	7362684	7387568	0.00669993	rs59665520	0.0003019		0.000364	rs8076791	1.43e-05	3.39575e-05
6	LOC643623	125995498	126041364	0.0819181	rs1739347	0.00431		4.5e-05	rs1268070	2e-06	4.98053e-05
8	NRG1-IT3	32298261	32300241	0.000489	rs2347485	9.263e-05		0.00949991	rs16879394	0.001979	6.16898e-05
17	TNFSF12-TNFSF13	7452374	7464925	0.00415996	rs189650944	0.0002058		0.00125999	rs143094271	6.62e-05	6.89723e-05
10	SKIDA1	21802408	21814611	0.000209	rs946711	5.405e-05		0.0290971	rs946711	0.008565	7.91193e-05
9	ABO	136130562	136150630	0.00175998	rs2519093	3.961e-05		0.00346997	rs647800	9.16e-05	7.9429e-05
13	NALCN	101706129	102068813	0.000339	rs946025	9.417e-07		0.019698	rs560750	6.79e-05	8.62532e-05
8	CLDN23	8559665	8561617	0.0194981	rs12548737	0.003875		0.000426	rs61754959	8e-05	0.000105476
14	LINC00618	97409915	97411731	0.00108999	rs58881967	0.000238		0.00779992	rs78892879	0.002007	0.000107763
10	NRP1	33466418	33623833	0.0194981	rs182093735	0.0001549		0.000510999	rs2506142	3.32e-06	0.000124709
12	MYO1A	57422300	57444549	0.030097	rs138851352	0.002222		0.000361	rs4759272	2.17e-05	0.000135052
3	SCN11A	38887259	38995142	0.00704993	rs7433733	0.0001484		0.00156998	rs4320030	3.44e-05	0.000137373
19	NCCRP1	39687603	39692522	0.00467995	rs12985483	0.002041		0.00244998	rs12610064	0.001067	0.000141902
7	HOXA10	27210209	27219880	0.000191	rs6970537	3.036e-05		0.0628937	rs7806799	0.01072	0.000148111
17	TNFSF13	7461608	7464925	0.0458954	rs11552708	0.01307		0.000262	rs143094271	6.62e-05	0.000148246
6	FOXC1	1610680	1614129	0.000166	rs984253	8.439e-05		0.0749251	rs2745599	0.046027	0.000152917
16	LINC00921	3313767	3317566	0.000159	rs224241	7.497e-05		0.0959041	rs1149487	0.051754	0.000184373
11	FSHB	30252562	30256824	0.000486	rs676349	0.0001394		0.0336966	rs78946483	0.010178	0.000196841
1	RABGAP1L_2	174933904	174964445	0.000236	rs55774740	2.067e-05		0.0719281	rs61828151	0.006145	0.000203425
8	AGO2	141541263	141645646	0.000452	rs7832054	4.503e-06		0.0376962	rs3735805	0.000531	0.000204124
1	MRPS21	150266261	150281414	0.0179982	rs138496123	0.001416		0.000992999	rs471464	7.87e-05	0.000213256
17	CHRNB1	7348405	7360932	0.00979902	rs7215056	0.001021		0.00192998	rs111972643	0.000204	0.000224593
14	SERPINA6	94770584	94789688	0.00677993	rs56252611	0.0002351		0.00286997	rs61980636	0.000102	0.000230526
1	MRPS14	174982093	174992591	0.000258	rs7554767	3.031e-05		0.0779221	rs16847706	0.011862	0.000237519
8	FAM49B	130851838	131028897	0.010499	rs117046451	9.781e-05		0.00198998	rs76215390	1.72e-05	0.000246035
20	BCAS4	49411430	49493714	0.000529999	rs6096117	6.526e-06		0.0413959	rs75761866	0.000693	0.000257292
14	OR4E2	22133296	22134238	0.00422996	rs2874103	0.001384		0.00577994	rs970382	0.001915	0.00028407
1	CACYBP	174968570	174981163	0.000348	rs1034462	4.662e-05		0.0708929	rs41266072	0.010922	0.000286424
10	MLLT10	21823100	22032559	0.000542999	rs7894565	1.079e-05		0.0455954	rs10828249	0.001213	0.000287353
2	IL36RN	113816214	113822320	0.0141986	rs2278717	0.002536		0.00177998	rs114189538	0.000215	0.00029281
15	NR2F2-AS1	96809615	96870590	0.0339966	rs3743466	0.0009746		0.000746999	rs1437588	1.73e-05	0.000294103
2	IL37	113670547	113676458	0.00147999	rs2723177	0.0002358		0.0173983	rs2708939	0.003339	0.000297843
1	HAX1	154245038	154248355	0.000418	rs13796	0.0001444		0.0641936	rs13796	0.024585	0.000309273
17	SPDYE4	8656423	8661877	0.0220978	rs76500808	0.004132		0.00122999	rs72848105	0.000245	0.000312924
12	ATF7	53901639	54020199	0.0699301	rs17763689	0.00239		0.000473	rs11170566	1.25e-05	0.00037432
11	RCOR2	63678692	63684316	0.00123999	rs12292160	0.0004315		0.029897	rs320109	0.012219	0.000415304
3	CCDC51	48473579	48481529	0.0523948	rs4858819	0.02289		0.000715999	rs13069724	0.000288	0.000419818
19	CATSPERD	5720687	5778742	0.000550999	rs34254251	1.164e-05		0.0729271	rs10417703	0.002127	0.000446916
1	LOC101926944	60238466	60254501	0.0565943	rs10489422	0.004186		0.000718999	rs80053041	4.65e-05	0.00045206
17	CYB561	61509664	61523722	0.00114999	rs2286572	0.0001543		0.0358964	rs4968774	0.00606	0.000458012
10	HSPA14	14880158	14913740	0.00770992	rs10906772	0.0005868		0.00593994	rs17268499	0.000437	0.000503363
11	SLC25A22	790474	798269	0.0223978	rs111277421	0.005844		0.00207998	rs112750986	0.000506	0.000511253
16	DDX28	68055176	68057770	0.00274997	rs237831	0.001376		0.0170983	rs13816	0.008175	0.00051557
17	FGF11	7342688	7348251	0.0111989	rs9906416	0.002593		0.00439996	rs9906416	0.000956	0.000537985
10	HELLS	96305523	96361856	0.0522948	rs12220588	0.003467		0.000988999	rs61886179	5.22e-05	0.000562174
3	TMA7	48481685	48485537	0.0469953	rs4858820	0.02026		0.00112999	rs7126	0.000469	0.000575822
5	FAM172A	92953430	93447404	0.0343966	rs115751571	0.0004687		0.00156998	rs10055389	1.43e-05	0.000584653
7	STYXL1	75625654	75677321	0.000590999	rs28634426	2.172e-05		0.0969031	rs34893364	0.005371	0.000616665
12	TMEM194A	57449425	57472574	0.0326967	rs7135297	0.002559		0.00177998	rs61937566	0.000117	0.000625741
22	GAB4	17442826	17489112	0.000724999	rs5748766	2.302e-05		0.0829171	rs5748765	0.003258	0.000644386
2	PAX8-AS1	113993103	114024600	0.00465995	rs13405033	0.0001365		0.0135986	rs11903972	0.000363	0.000675928
3	ZBTB11	101368282	101395988	0.00181998	rs61685120	0.0001762		0.0353965	rs139969996	0.004316	0.000686087
12	TAC3	57403780	57410344	0.0552945	rs2291855	0.01099		0.00118999	rs2122694	0.000246	0.000699379
2	PAX8	113973573	114036498	0.00473995	rs67802835	8.732e-05		0.0140986	rs17043176	0.000299	0.000709259
8	MYBL1	67474409	67525480	0.0418958	rs117045962	0.004685		0.00159998	rs79752382	0.000142	0.000711238
9	PTCH1	98205263	98279247	0.0729271	rs28591501	0.00555		0.00096999	rs145965565	5.08e-05	0.000746753
17	HLF	53342320	53402426	0.00929907	rs2270378	0.0001741		0.00772992	rs11650482	0.00015	0.000757662
6	LOC101928519	19068773	19180711	0.0110989	rs143439730	0.0002107		0.00665993	rs77981680	0.000121	0.000777066
3	NICN1	49459765	49466757	0.000851999	rs1464569	0.0001332		0.0879121	rs114877151	0.020099	0.000786412
12	RDH16	57345215	57351418	0.0108989	rs746049	0.001378		0.00716993	rs11172074	0.001053	0.000817152
10	TBC1D12	96162185	96296089	0.0749251	rs4316436	0.002441		0.00105999	rs11598846	2.65e-05	0.000829203
8	KCTD9	25285363	25315984	0.00181998	rs17053711	0.0001776		0.0439956	rs17053711	0.005921	0.00083535
15	SMAD3	67358194	67487533	0.00902991	rs7173811	7.607e-05		0.00949905	rs12593904	6.95e-05	0.000888959
6	HMGA1	34204576	34214008	0.019998	rs73744859	0.004947		0.00450995	rs1011905	0.001185	0.000930184
1	GOLPH3L	150618700	150669672	0.00243998	rs12731712	0.0001366		0.0369963	rs9733	0.002402	0.000930929
8	CDCA2	25316512	25365425	0.00296997	rs55796651	0.0001702		0.0309969	rs62502024	0.001999	0.000947579
7	TMED4	44618761	44621827	0.019998	rs3750098	0.005493		0.00460995	rs3750098	0.001326	0.000948787
1	NDUFS5	39491966	39500308	0.0141986	rs7546089	0.001317		0.00652993	rs6691796	0.000595	0.000953672
[truncated: 417 more rows]
